# Supplementary material for: MiR-146a wild-type 3′ sequence identity is dispensable for proper innate immune function in vivo
Source: Life Sci Alliance. 2019 Feb 18;2(1):e201800249. doi: 10.26508/lsa.201800249 (PMC6379685; doi:10.26508/lsa.201800249)
Supplement: Supplementary file 1 [file LSA-2018-00249_TableS1.xlsx]

## Sheet: Sheet1
Supplementary Table S1: Raw and normalized RNAseq count reads mapping to indicated miRNAs in BMDMs of indicated genotype. WT = wild-type. KO = miR-146a null. 3F = miR-146a "3'Flip" mutant. A, B = BMDM culture biological replicate identifier. It is important to note that the relative abundance of any short RNA species in a given RNAseq library is a function of both its actual abundance and its spe…
#miRNA	precursor	WTA	WTA(norm)	WTB	WTB(norm)	KOA	KOA(norm)	3FA	3FA(norm)
mmu-let-7a-5p	mmu-let-7a-1	146655	8589.65	131423	11517.3	256409	13433.2	163097	10071.1
mmu-let-7a-1-3p	mmu-let-7a-1	1754	102.73	1231.83	107.95	2588.17	135.59	1555.33	96.04
mmu-let-7a-5p	mmu-let-7a-2	145616	8528.82	130660	11450.4	254796	13348.7	161983	10002.3
mmu-let-7a-2-3p	mmu-let-7a-2	4.5	0.26	1.5	0.13	6	0.31	4.5	0.28
mmu-let-7b-5p	mmu-let-7b	20873	1222.54	16921.4	1482.91	35409.2	1855.09	20600.8	1272.08
mmu-let-7b-3p	mmu-let-7b	249	14.58	239.5	20.99	336.5	17.63	272	16.8
mmu-let-7c-5p	mmu-let-7c-1	55569.1	3254.71	43006.3	3768.86	95195.3	4987.27	58325.9	3601.56
mmu-let-7c-1-3p	mmu-let-7c-1	1069	62.61	933.5	81.81	2113	110.7	1182.5	73.02
mmu-let-7c-5p	mmu-let-7c-2	56291.4	3297.02	43576.3	3818.82	96359.9	5048.29	59091.7	3648.85
mmu-let-7c-2-3p	mmu-let-7c-2	1755	102.79	1232.83	108.04	2592.17	135.8	1556.33	96.1
mmu-let-7d-5p	mmu-let-7d	109418	6408.64	100167	8778.15	177153	9281.01	112148	6925.04
mmu-let-7d-3p	mmu-let-7d	11738	687.5	11133	975.64	16840	882.25	11912	735.55
mmu-let-7e-5p	mmu-let-7e	33212.2	1945.25	21573.3	1890.58	54605.9	2860.8	38251	2361.96
mmu-let-7e-3p	mmu-let-7e	377.5	22.11	256	22.43	793	41.55	471	29.08
mmu-let-7f-5p	mmu-let-7f-1	654138	38313.2	474669	41597.8	851535	44611.9	684449	42264
mmu-let-7f-1-3p	mmu-let-7f-1	446	26.12	347.5	30.45	526.5	27.58	411	25.38
mmu-let-7f-5p	mmu-let-7f-2	696751	40809.1	505332	44284.9	897958	47043.9	727835	44943.1
mmu-let-7f-2-3p	mmu-let-7f-2	213	12.48	142.33	12.47	292.67	15.33	142.33	8.79
mmu-let-7g-5p	mmu-let-7g	547076	32042.5	380629	33356.5	777215	40718.2	579299	35771.2
mmu-let-7g-3p	mmu-let-7g	15	0.88	9	0.79	11	0.58	7	0.43
mmu-let-7i-5p	mmu-let-7i	1.27693e+06	74790.5	873944	76588.2	1.39599e+06	73135.6	1183001	73049.1
mmu-let-7i-3p	mmu-let-7i	170	9.96	88	7.71	184	9.64	119	7.35
mmu-let-7j	mmu-let-7j	50471.5	2956.14	34370	3012.02	59597	3122.28	44172	2727.58
mmu-let-7k	mmu-let-7k	5.25	0.31	5.5	0.48	15.25	0.8	10.5	0.65
mmu-miR-100-5p	mmu-mir-100	775.5	45.42	476.5	41.76	1872.5	98.1	850.5	52.52
mmu-miR-100-3p	mmu-mir-100	0	0	0	0	0	0	0	0
mmu-miR-101a-5p	mmu-mir-101a	5	0.29	2	0.18	5	0.26	1	0.06
mmu-miR-101a-3p	mmu-mir-101a	9496	556.19	5391	472.44	15652	820.01	10083.5	622.65
mmu-miR-101b-5p	mmu-mir-101b	1	0.06	0	0	0	0	0	0
mmu-miR-101b-3p	mmu-mir-101b	21217	1242.69	13131.5	1150.78	23536	1233.05	18034.5	1113.61
mmu-miR-101c	mmu-mir-101c	0.5	0.03	0.5	0.04	0	0	0	0
mmu-miR-103-1-5p	mmu-mir-103-1	0	0	0.5	0.04	0	0	0.5	0.03
mmu-miR-103-3p	mmu-mir-103-1	61846.2	3622.36	39718.5	3480.74	74284.3	3891.75	56125.7	3465.7
mmu-miR-103-3p	mmu-mir-103-2	63750.2	3733.88	40995	3592.6	76016.8	3982.52	57612.2	3557.49
mmu-miR-103-2-5p	mmu-mir-103-2	10	0.59	6.5	0.57	3	0.16	5.5	0.34
mmu-miR-105	mmu-mir-105	0	0	0	0	0	0	0	0
mmu-miR-106a-5p	mmu-mir-106a	50	2.93	40.17	3.52	42.5	2.23	40.17	2.48
mmu-miR-106a-3p	mmu-mir-106a	0	0	0	0	0	0	0	0
mmu-miR-106b-5p	mmu-mir-106b	1815	106.31	978	85.71	1593	83.46	1465.33	90.48
mmu-miR-106b-3p	mmu-mir-106b	13282	777.93	9810	859.7	16271	852.44	13242	817.68
mmu-miR-107-5p	mmu-mir-107	0	0	0	0	1	0.05	0	0
mmu-miR-107-3p	mmu-mir-107	2399.67	140.55	1615.5	141.57	2644.83	138.56	1868.17	115.36
mmu-miR-10a-5p	mmu-mir-10a	66386.5	3888.29	46559	4080.21	89709	4699.85	87480.5	5401.83
mmu-miR-10a-3p	mmu-mir-10a	208	12.18	149	13.06	277	14.51	271	16.73
mmu-miR-10b-5p	mmu-mir-10b	160.5	9.4	119	10.43	203	10.64	188.5	11.64
mmu-miR-10b-3p	mmu-mir-10b	0	0	0	0	0	0	0	0
mmu-miR-1187	mmu-mir-1187	3.32	0.19	7.5	0.66	7.5	0.39	3.32	0.21
mmu-miR-1188-5p	mmu-mir-1188	0	0	0	0	0	0	0	0
mmu-miR-1188-3p	mmu-mir-1188	0	0	0	0	0	0	0	0
mmu-miR-1190	mmu-mir-1190	0	0	2	0.18	0	0	0	0
mmu-miR-1191a	mmu-mir-1191a	562	32.92	476	41.71	625	32.74	475	29.33
mmu-miR-1191b-5p	mmu-mir-1191b	38	2.23	21	1.84	35	1.83	33	2.04
mmu-miR-1191b-3p	mmu-mir-1191b	1	0.06	0	0	3	0.16	0	0
mmu-miR-1192	mmu-mir-1192	0	0	0	0	0	0	0	0
mmu-miR-1193-5p	mmu-mir-1193	0	0	0	0	0	0	0	0
mmu-miR-1193-3p	mmu-mir-1193	0	0	0	0	0	0	0	0
mmu-miR-1194	mmu-mir-1194	97	5.68	60	5.26	87	4.56	82	5.06
mmu-miR-1195	mmu-mir-1195	8	0.47	14	1.23	14	0.73	20	1.23
mmu-miR-1197-5p	mmu-mir-1197	0	0	0	0	0	0	0	0
mmu-miR-1197-3p	mmu-mir-1197	0	0	0	0	0	0	0	0
mmu-miR-1198-5p	mmu-mir-1198	18126	1061.65	15789	1383.67	20707	1084.84	16638	1027.38
mmu-miR-1198-3p	mmu-mir-1198	45	2.64	40	3.51	54	2.83	34	2.1
mmu-miR-1199-5p	mmu-mir-1199	16	0.94	5	0.44	12	0.63	8	0.49
mmu-miR-1199-3p	mmu-mir-1199	0	0	0	0	1	0.05	0	0
mmu-miR-12178-5p	mmu-mir-12178	0	0	0	0	0	0	0	0
mmu-miR-12178-3p	mmu-mir-12178	0	0	0	0	0	0	0	0
mmu-miR-12179-5p	mmu-mir-12179	0	0	0	0	0	0	0	0
mmu-miR-12180-3p	mmu-mir-12180	0	0	0	0	0	0	0	0
mmu-miR-12181-5p	mmu-mir-12181	0	0	0	0	0	0	0	0
mmu-miR-12181-3p	mmu-mir-12181	0	0	0	0	0	0	0	0
mmu-miR-12182-5p	mmu-mir-12182	0	0	0	0	0	0	0	0
mmu-miR-12182-3p	mmu-mir-12182	0	0	0	0	1	0.05	0	0
mmu-miR-12183-5p	mmu-mir-12183	0	0	0	0	0	0	0	0
mmu-miR-12184-5p	mmu-mir-12184	0	0	0	0	0	0	0	0
mmu-miR-12184-3p	mmu-mir-12184	0	0	0	0	1	0.05	0	0
mmu-miR-12185-5p	mmu-mir-12185	0	0	1	0.09	0	0	0	0
mmu-miR-12185-3p	mmu-mir-12185	8	0.47	5	0.44	2	0.1	3	0.19
mmu-miR-12186-5p	mmu-mir-12186	0	0	0	0	0	0	0	0
mmu-miR-12186-3p	mmu-mir-12186	0	0	0	0	0	0	0	0
mmu-miR-12187-5p	mmu-mir-12187	0	0	1	0.09	0	0	0	0
mmu-miR-12187-3p	mmu-mir-12187	2	0.12	2	0.18	3	0.16	4	0.25
mmu-miR-12188-5p	mmu-mir-12188	0	0	0	0	0	0	0	0
mmu-miR-12188-3p	mmu-mir-12188	0	0	0	0	0	0	0	0
mmu-miR-12189-3p	mmu-mir-12189	17	1	12	1.05	28	1.47	18	1.11
mmu-miR-12190-3p	mmu-mir-12190	0	0	0	0	0	0	0	0
mmu-miR-12191-5p	mmu-mir-12191	0	0	0	0	0	0	0	0
mmu-miR-12191-3p	mmu-mir-12191	11	0.64	9	0.79	19	1	14	0.86
mmu-miR-12192-5p	mmu-mir-12192	0	0	0	0	0	0	0	0
mmu-miR-12193-5p	mmu-mir-12193	4	0.23	0	0	2	0.1	1	0.06
mmu-miR-12193-3p	mmu-mir-12193	1	0.06	4	0.35	3	0.16	1	0.06
mmu-miR-12194-3p	mmu-mir-12194	0	0	0	0	0	0	0	0
mmu-miR-12195-5p	mmu-mir-12195	0	0	0	0	0	0	0	0
mmu-miR-12195-3p	mmu-mir-12195	0	0	0	0	0	0	0	0
mmu-miR-12196-5p	mmu-mir-12196	2	0.12	0	0	0	0	0	0
mmu-miR-12196-3p	mmu-mir-12196	0	0	0	0	0	0	0	0
mmu-miR-12197-3p	mmu-mir-12197	0	0	0	0	0	0	0	0
mmu-miR-12198-3p	mmu-mir-12198	0	0	0	0	0	0	0	0
mmu-miR-12199-3p	mmu-mir-12199	0	0	2	0.18	0	0	0	0
mmu-miR-122-5p	mmu-mir-122	21	1.23	21	1.84	29	1.52	18	1.11
mmu-miR-122-3p	mmu-mir-122	0	0	0	0	0	0	0	0
mmu-miR-12200-5p	mmu-mir-12200	0	0	0	0	0	0	0	0
mmu-miR-12200-3p	mmu-mir-12200	0	0	0	0	0	0	0	0
mmu-miR-12201-5p	mmu-mir-12201	11	0.64	12	1.05	4	0.21	8	0.49
mmu-miR-12201-3p	mmu-mir-12201	0	0	0	0	1	0.05	0	0
mmu-miR-12202-5p	mmu-mir-12202	2	0.12	1	0.09	0	0	0	0
mmu-miR-12202-3p	mmu-mir-12202	5	0.29	3	0.26	2	0.1	1	0.06
mmu-miR-12203-5p	mmu-mir-12203	0	0	0	0	0	0	0	0
mmu-miR-12203-3p	mmu-mir-12203	0	0	0	0	0	0	0	0
mmu-miR-12204-5p	mmu-mir-12204	0	0	0	0	0	0	0	0
mmu-miR-12205-5p	mmu-mir-12205	0	0	0	0	0	0	0	0
mmu-miR-12205-3p	mmu-mir-12205	0	0	0	0	0	0	0	0
mmu-miR-12206-5p	mmu-mir-12206	0	0	0	0	0	0	0	0
mmu-miR-1224-5p	mmu-mir-1224	0	0	0	0	0	0	0	0
mmu-miR-1224-3p	mmu-mir-1224	0	0	0	0	0	0	0	0
mmu-miR-122b-5p	mmu-mir-122b	3	0.18	3	0.26	0	0	2	0.12
mmu-miR-122b-3p	mmu-mir-122b	0	0	0	0	0	0	0	0
mmu-miR-1231-5p	mmu-mir-1231	29	1.7	25	2.19	12	0.63	23	1.42
mmu-miR-1231-3p	mmu-mir-1231	15	0.88	9	0.79	21	1.1	17	1.05
mmu-miR-124-5p	mmu-mir-124-1	0	0	0	0	0	0	0	0
mmu-miR-124-3p	mmu-mir-124-1	0	0	0	0	0	0	0	0
mmu-miR-124-5p	mmu-mir-124-2	0	0	0	0	0	0	0	0
mmu-miR-124-3p	mmu-mir-124-2	0	0	0	0	0	0	0	0
mmu-miR-124-5p	mmu-mir-124-3	0	0	0	0	0	0	0	0
mmu-miR-124-3p	mmu-mir-124-3	0	0	0	0	0	0	0	0
mmu-miR-1247-5p	mmu-mir-1247	0	0	0	0	0	0	0	0
mmu-miR-1247-3p	mmu-mir-1247	0	0	0	0	0	0	0	0
mmu-miR-1249-5p	mmu-mir-1249	50	2.93	49	4.29	48	2.51	41	2.53
mmu-miR-1249-3p	mmu-mir-1249	2944	172.43	2691	235.83	2721	142.55	3211	198.28
mmu-miR-124b-3p	mmu-mir-124b	1	0.06	0	0	3	0.16	1	0.06
mmu-miR-1251-5p	mmu-mir-1251	0	0	0	0	0	0	0	0
mmu-miR-1251-3p	mmu-mir-1251	0	0	0	0	0	0	0	0
mmu-miR-1258-5p	mmu-mir-1258	0	0	1	0.09	2	0.1	2	0.12
mmu-miR-1258-3p	mmu-mir-1258	16	0.94	0	0	18	0.94	3	0.19
mmu-miR-125a-5p	mmu-mir-125a	24049	1408.56	18012	1578.49	45411	2379.08	28174	1739.72
mmu-miR-125a-3p	mmu-mir-125a	706	41.35	480	42.06	1312	68.74	837	51.68
mmu-miR-125b-5p	mmu-mir-125b-1	8779.5	514.22	5877.5	515.08	14751	772.8	8900.5	549.6
mmu-miR-125b-1-3p	mmu-mir-125b-1	82	4.8	45	3.94	280	14.67	103	6.36
mmu-miR-125b-5p	mmu-mir-125b-2	8476.5	496.47	5718.5	501.14	14094	738.38	8642.5	533.67
mmu-miR-125b-2-3p	mmu-mir-125b-2	1617	94.71	875	76.68	2322	121.65	1585	97.87
mmu-miR-1264-5p	mmu-mir-1264	0	0	0	0	0	0	0	0
mmu-miR-1264-3p	mmu-mir-1264	0	0	0	0	0	0	0	0
mmu-miR-126a-5p	mmu-mir-126a	7	0.41	4	0.35	16	0.84	12	0.74
mmu-miR-126a-3p	mmu-mir-126a	182	10.66	112	9.82	251	13.15	167	10.31
mmu-miR-126b-5p	mmu-mir-126b	1	0.06	0	0	0	0	0	0
mmu-miR-126b-3p	mmu-mir-126b	1	0.06	3	0.26	0	0	4	0.25
mmu-miR-127-5p	mmu-mir-127	0	0	0	0	0	0	0	0
mmu-miR-127-3p	mmu-mir-127	1	0.06	1	0.09	0	0	1	0.06
mmu-miR-1271-5p	mmu-mir-1271	2	0.12	0	0	2	0.1	3	0.19
mmu-miR-1271-3p	mmu-mir-1271	2	0.12	7	0.61	9	0.47	4	0.25
mmu-miR-128-1-5p	mmu-mir-128-1	174	10.19	153	13.41	171	8.96	196	12.1
mmu-miR-128-3p	mmu-mir-128-1	15378	900.7	13615	1193.15	18277	957.53	16476	1017.38
mmu-miR-128-3p	mmu-mir-128-2	8422	493.28	7668	671.99	10296	539.41	8921	550.86
mmu-miR-128-2-5p	mmu-mir-128-2	0	0	0	0	0	0	0	0
mmu-miR-129-5p	mmu-mir-129-1	30.5	1.79	27	2.37	21	1.1	17	1.05
mmu-miR-129-1-3p	mmu-mir-129-1	0	0	0	0	0	0	0	0
mmu-miR-129-5p	mmu-mir-129-2	30.5	1.79	27	2.37	21	1.1	17	1.05
mmu-miR-129-2-3p	mmu-mir-129-2	10	0.59	5	0.44	9	0.47	9	0.56
mmu-miR-1291	mmu-mir-1291	25	1.46	17	1.49	27	1.41	16	0.99
mmu-miR-1298-5p	mmu-mir-1298	0	0	0	0	0	0	0	0
mmu-miR-1298-3p	mmu-mir-1298	0	0	0	0	0	0	0	0
mmu-miR-129b-5p	mmu-mir-129b	0	0	0	0	0	0	0	0
mmu-miR-129b-3p	mmu-mir-129b	0	0	0	0	1	0.05	0	0
mmu-miR-1306-5p	mmu-mir-1306	388	22.73	336	29.45	402	21.06	378	23.34
mmu-miR-1306-3p	mmu-mir-1306	53	3.1	28	2.45	95	4.98	33	2.04
mmu-miR-130a-5p	mmu-mir-130a	0	0	0	0	0	0	0	0
mmu-miR-130a-3p	mmu-mir-130a	10.5	0.61	8.5	0.74	8.5	0.45	6	0.37
mmu-miR-130b-5p	mmu-mir-130b	5320	311.6	4504	394.71	9136	478.63	5742	354.56
mmu-miR-130b-3p	mmu-mir-130b	357.5	20.94	251.5	22.04	416.5	21.82	298	18.4
mmu-miR-130c	mmu-mir-130c	0	0	0	0	0	0	0	0
mmu-miR-132-5p	mmu-mir-132	110	6.44	65	5.7	84	4.4	86	5.31
mmu-miR-132-3p	mmu-mir-132	507	29.7	344	30.15	359	18.81	524	32.36
mmu-miR-133a-5p	mmu-mir-133a-1	0	0	0	0	0	0	0	0
mmu-miR-133a-3p	mmu-mir-133a-1	0	0	0	0	1	0.05	0	0
mmu-miR-133a-5p	mmu-mir-133a-2	0	0	0	0	0	0	0	0
mmu-miR-133a-3p	mmu-mir-133a-2	0	0	0	0	1	0.05	0	0
mmu-miR-133b-5p	mmu-mir-133b	0	0	0	0	0	0	0	0
mmu-miR-133b-3p	mmu-mir-133b	0	0	0	0	0	0	0	0
mmu-miR-133c	mmu-mir-133c	0	0	0	0	0	0	0	0
mmu-miR-134-5p	mmu-mir-134	0	0	0	0	0	0	0	0
mmu-miR-134-3p	mmu-mir-134	0	0	0	0	0	0	0	0
mmu-miR-135a-5p	mmu-mir-135a-1	1	0.06	1	0.09	1	0.05	0.5	0.03
mmu-miR-135a-1-3p	mmu-mir-135a-1	0	0	1	0.09	0	0	1	0.06
mmu-miR-135a-5p	mmu-mir-135a-2	1	0.06	1	0.09	1	0.05	0.5	0.03
mmu-miR-135a-2-3p	mmu-mir-135a-2	0	0	0	0	0	0	0	0
mmu-miR-135b-5p	mmu-mir-135b	0	0	0	0	0	0	0	0
mmu-miR-135b-3p	mmu-mir-135b	0	0	0	0	0	0	0	0
mmu-miR-136-5p	mmu-mir-136	0	0	0	0	0	0	0	0
mmu-miR-136-3p	mmu-mir-136	0	0	0	0	0	0	0	0
mmu-miR-137-5p	mmu-mir-137	0	0	0	0	0	0	0	0
mmu-miR-137-3p	mmu-mir-137	0	0	0	0	0	0	0	0
mmu-miR-138-5p	mmu-mir-138-1	4	0.23	4.5	0.39	4.5	0.24	3.5	0.22
mmu-miR-138-1-3p	mmu-mir-138-1	2	0.12	0	0	3	0.16	0	0
mmu-miR-138-5p	mmu-mir-138-2	0	0	4.5	0.39	0.5	0.03	2.5	0.15
mmu-miR-138-2-3p	mmu-mir-138-2	4	0.23	0	0	0	0	0	0
mmu-miR-139-5p	mmu-mir-139	3440	201.48	2064	180.88	7545	395.28	3207	198.03
mmu-miR-139-3p	mmu-mir-139	416	24.37	315	27.61	1452	76.07	419	25.87
mmu-miR-140-5p	mmu-mir-140	9776	572.59	6272	549.65	9552	500.43	7471	461.33
mmu-miR-140-3p	mmu-mir-140	153910	9014.59	88001	7711.98	182052	9537.69	149933	9258.21
mmu-miR-141-5p	mmu-mir-141	0	0	2	0.18	3	0.16	1	0.06
mmu-miR-141-3p	mmu-mir-141	7.5	0.44	5.5	0.48	12	0.63	17.5	1.08
mmu-miR-142a-5p	mmu-mir-142a	4577	268.08	1936.5	169.71	4185.5	219.28	3360.5	207.51
mmu-miR-142a-3p	mmu-mir-142a	29378.5	1720.71	12789	1120.77	21275	1114.6	17341.5	1070.82
mmu-miR-142b	mmu-mir-142b	3	0.18	2	0.18	1	0.05	4	0.25
mmu-miR-143-5p	mmu-mir-143	0	0	0	0	1	0.05	0	0
mmu-miR-143-3p	mmu-mir-143	81	4.74	56	4.91	40	2.1	36	2.22
mmu-miR-144-5p	mmu-mir-144	14	0.82	21	1.84	3	0.16	7	0.43
mmu-miR-144-3p	mmu-mir-144	7	0.41	7	0.61	2	0.1	2	0.12
mmu-miR-145a-5p	mmu-mir-145a	3	0.18	2	0.18	0	0	0	0
mmu-miR-145a-3p	mmu-mir-145a	0	0	1	0.09	1	0.05	0	0
mmu-miR-145b	mmu-mir-145b	0	0	0	0	0	0	0	0
mmu-miR-146a-5p	mmu-mir-146a	106754	6252.61	62590	5485.09	256.5	13.44	107.5	6.64
mmu-miR-146a-3p	mmu-mir-146a	8	0.47	3	0.26	0	0	0	0
mmu-miR-146b-5p	mmu-mir-146b	26602.5	1558.12	21864	1916.06	84176.5	4410	26214.5	1618.72
mmu-miR-146b-3p	mmu-mir-146b	41	2.4	38	3.33	171	8.96	52	3.21
mmu-miR-146_3'F-5p	mmu-mir-146_3'F	0	0	0	0	0	0	171	10.56
mmu-miR-147-5p	mmu-mir-147	200	11.71	182	15.95	113	5.92	213	13.15
mmu-miR-147-3p	mmu-mir-147	153	8.96	136	11.92	109	5.71	182	11.24
mmu-miR-148a-5p	mmu-mir-148a	226	13.24	159	13.93	208	10.9	211	13.03
mmu-miR-148a-3p	mmu-mir-148a	80457.5	4712.44	54955	4815.99	87932.3	4606.77	86176.5	5321.31
mmu-miR-148b-5p	mmu-mir-148b	699	40.94	437	38.3	849	44.48	639	39.46
mmu-miR-148b-3p	mmu-mir-148b	77575	4543.61	51746.5	4534.81	104759	5488.33	78914	4872.86
mmu-miR-149-5p	mmu-mir-149	763	44.69	598	52.41	592	31.01	665	41.06
mmu-miR-149-3p	mmu-mir-149	0	0	1	0.09	1	0.05	2	0.12
mmu-miR-150-5p	mmu-mir-150	50	2.93	32	2.8	48	2.51	25	1.54
mmu-miR-150-3p	mmu-mir-150	1	0.06	0	0	0	0	0	0
mmu-miR-151-5p	mmu-mir-151	385	22.55	245	21.47	404.83	21.21	330.33	20.4
mmu-miR-151-3p	mmu-mir-151	24378	1427.83	19471	1706.34	30886	1618.12	24381	1505.5
mmu-miR-152-5p	mmu-mir-152	614	35.96	342	29.97	541	28.34	463	28.59
mmu-miR-152-3p	mmu-mir-152	14667.5	859.08	9452.5	828.37	24838.3	1301.28	14662.5	905.39
mmu-miR-153-5p	mmu-mir-153	0	0	0	0	0	0	0	0
mmu-miR-153-3p	mmu-mir-153	0	0	0	0	0	0	0	0
mmu-miR-154-5p	mmu-mir-154	0	0	0	0	0	0	0	0
mmu-miR-154-3p	mmu-mir-154	0	0	0	0	0	0	0	0
mmu-miR-155-5p	mmu-mir-155	1217	71.28	802	70.28	1054	55.22	1016	62.74
mmu-miR-155-3p	mmu-mir-155	31	1.82	21	1.84	34	1.78	36	2.22
mmu-miR-15a-5p	mmu-mir-15a	732	42.87	426.5	37.38	815.5	42.72	552	34.09
mmu-miR-15a-3p	mmu-mir-15a	102	5.97	48	4.21	106	5.55	63	3.89
mmu-miR-15b-5p	mmu-mir-15b	7406	433.77	5303.5	464.77	7879.5	412.81	6286	388.15
mmu-miR-15b-3p	mmu-mir-15b	2517	147.42	2022	177.2	2628	137.68	1972	121.77
mmu-miR-16-5p	mmu-mir-16-1	11027.8	645.91	7026.83	615.8	11081.2	580.54	9481.5	585.47
mmu-miR-16-1-3p	mmu-mir-16-1	8867	519.34	4968	435.37	9002	471.61	7543	465.77
mmu-miR-16-5p	mmu-mir-16-2	10949.8	641.34	6988.83	612.47	11066.2	579.76	9427.5	582.14
mmu-miR-16-2-3p	mmu-mir-16-2	216	12.65	143	12.53	209	10.95	127	7.84
mmu-miR-1668	mmu-mir-1668	22	1.29	7	0.61	25	1.31	21	1.3
mmu-miR-17-5p	mmu-mir-17	15160.2	887.94	11755.3	1030.18	13619	713.5	10371	640.4
mmu-miR-17-3p	mmu-mir-17	327	19.15	209	18.32	318	16.66	273	16.86
mmu-miR-181a-5p	mmu-mir-181a-1	4175.75	244.58	3129.5	274.25	5774.25	302.51	3950.75	243.95
mmu-miR-181a-1-3p	mmu-mir-181a-1	4039	236.57	2001	175.36	4482.5	234.84	4030	248.85
mmu-miR-181a-5p	mmu-mir-181a-2	4168.75	244.17	3124.5	273.82	5770.25	302.3	3947.75	243.77
mmu-miR-181a-2-3p	mmu-mir-181a-2	414	24.25	364	31.9	615	32.22	488.5	30.16
mmu-miR-181b-5p	mmu-mir-181b-1	3680.08	215.54	2946	258.17	4778.25	250.33	3013.75	186.1
mmu-miR-181b-1-3p	mmu-mir-181b-1	315	18.45	210	18.4	380.5	19.93	290.5	17.94
mmu-miR-181b-5p	mmu-mir-181b-2	4043.08	236.81	3220.5	282.23	5177.25	271.24	3277.75	202.4
mmu-miR-181b-2-3p	mmu-mir-181b-2	16	0.94	11	0.96	10.5	0.55	13.5	0.83
mmu-miR-181c-5p	mmu-mir-181c	23	1.35	2	0.18	18	0.94	7	0.43
mmu-miR-181c-3p	mmu-mir-181c	23	1.35	9	0.79	30.5	1.6	17.5	1.08
mmu-miR-181d-5p	mmu-mir-181d	285.33	16.71	152.5	13.36	286	14.98	220	13.58
mmu-miR-181d-3p	mmu-mir-181d	1	0.06	0	0	2	0.1	1	0.06
mmu-miR-182-5p	mmu-mir-182	6717	393.42	4502	394.53	8292	434.42	7219	445.77
mmu-miR-182-3p	mmu-mir-182	5	0.29	6	0.53	2	0.1	10	0.62
mmu-miR-183-5p	mmu-mir-183	4928	288.64	3771	330.47	6780	355.2	6239	385.25
mmu-miR-183-3p	mmu-mir-183	5	0.29	4	0.35	10	0.52	11	0.68
mmu-miR-1839-5p	mmu-mir-1839	17212	1008.12	12819	1123.4	22720	1190.3	19456	1201.39
mmu-miR-1839-3p	mmu-mir-1839	211	12.36	145	12.71	155	8.12	210	12.97
mmu-miR-184-5p	mmu-mir-184	0	0	0	0	2	0.1	0	0
mmu-miR-184-3p	mmu-mir-184	47	2.75	23	2.02	31	1.62	35	2.16
mmu-miR-1843a-5p	mmu-mir-1843a	1653.5	96.85	1130.5	99.07	2346	122.91	2000.5	123.53
mmu-miR-1843a-3p	mmu-mir-1843a	63.5	3.72	53.5	4.69	88.5	4.64	94	5.8
mmu-miR-1843b-5p	mmu-mir-1843b	646	37.84	380	33.3	944	49.46	749.5	46.28
mmu-miR-1843b-3p	mmu-mir-1843b	7	0.41	3	0.26	11	0.58	5	0.31
mmu-miR-185-5p	mmu-mir-185	22180	1299.09	17502	1533.79	25905	1357.16	21316	1316.24
mmu-miR-185-3p	mmu-mir-185	676	39.59	440	38.56	909	47.62	644	39.77
mmu-miR-186-5p	mmu-mir-186	13330	780.74	8120	711.6	15463	810.11	11325	699.31
mmu-miR-186-3p	mmu-mir-186	24	1.41	13	1.14	23	1.2	12	0.74
mmu-miR-187-5p	mmu-mir-187	0	0	2	0.18	1	0.05	0	0
mmu-miR-187-3p	mmu-mir-187	6	0.35	5	0.44	14	0.73	7	0.43
mmu-miR-188-5p	mmu-mir-188	245	14.35	108	9.46	226	11.84	141	8.71
mmu-miR-188-3p	mmu-mir-188	8	0.47	5	0.44	7	0.37	6	0.37
mmu-miR-1892	mmu-mir-1892	1	0.06	0	0	0	0	0	0
mmu-miR-1893	mmu-mir-1893	0	0	0	0	0	0	0	0
mmu-miR-1894-5p	mmu-mir-1894	0	0	0	0	0	0	0	0
mmu-miR-1894-3p	mmu-mir-1894	0	0	0	0	0	0	0	0
mmu-miR-1895	mmu-mir-1895	3.5	0.2	0	0	5	0.26	2	0.12
mmu-miR-1896	mmu-mir-1896	0	0	0	0	0	0	0	0
mmu-miR-1897-5p	mmu-mir-1897	0	0	0	0	0	0	0	0
mmu-miR-1897-3p	mmu-mir-1897	0	0	0	0	0	0	0	0
mmu-miR-1898	mmu-mir-1898	0	0	0	0	0	0	0	0
mmu-miR-1899	mmu-mir-1899	0	0	0	0	0	0	0	0
mmu-miR-18a-5p	mmu-mir-18a	584.5	34.23	323	28.31	404.5	21.19	316	19.51
mmu-miR-18a-3p	mmu-mir-18a	187	10.95	211	18.49	292	15.3	154	9.51
mmu-miR-18b-5p	mmu-mir-18b	0.5	0.03	0	0	0.5	0.03	0	0
mmu-miR-18b-3p	mmu-mir-18b	0	0	0	0	0	0	0	0
mmu-miR-1900	mmu-mir-1900	0	0	0	0	0	0	0	0
mmu-miR-1901	mmu-mir-1901	0	0	0	0	0	0	0	0
mmu-miR-1902	mmu-mir-1902	0	0	0	0	0	0	0	0
mmu-miR-1903	mmu-mir-1903	0	0	0	0	0	0	0	0
mmu-miR-1904	mmu-mir-1904	0	0	0	0	0	0	0	0
mmu-miR-1905	mmu-mir-1905	0	0	0	0	0	0	0	0
mmu-miR-1906	mmu-mir-1906-1	0	0	0	0	0	0	0	0
mmu-miR-1906	mmu-mir-1906-2	0	0	0	0	0	0	0	0
mmu-miR-1907	mmu-mir-1907	0	0	0	0	0	0	0	0
mmu-miR-190a-5p	mmu-mir-190a	2	0.12	1	0.09	0	0	1	0.06
mmu-miR-190a-3p	mmu-mir-190a	0	0	0	0	0	0	0	0
mmu-miR-190b-5p	mmu-mir-190b	48	2.81	43	3.77	68	3.56	41	2.53
mmu-miR-190b-3p	mmu-mir-190b	0	0	2	0.18	3	0.16	3	0.19
mmu-miR-191-5p	mmu-mir-191	93222	5460.06	70135	6146.29	117645	6163.41	83250	5140.6
mmu-miR-191-3p	mmu-mir-191	185	10.84	132	11.57	277	14.51	219	13.52
mmu-miR-1911-5p	mmu-mir-1911	0	0	0	0	0	0	0	0
mmu-miR-1911-3p	mmu-mir-1911	0	0	0	0	0	0	0	0
mmu-miR-1912-5p	mmu-mir-1912	0	0	0	0	0	0	0	0
mmu-miR-1912-3p	mmu-mir-1912	0	0	0	0	0	0	0	0
mmu-miR-192-5p	mmu-mir-192	4237.5	248.19	2534	222.07	6814	356.98	4403	271.88
mmu-miR-192-3p	mmu-mir-192	0	0	2	0.18	0	0	0	0
mmu-miR-1927	mmu-mir-1927	10	0.59	5	0.44	9	0.47	7	0.43
mmu-miR-1928	mmu-mir-1928	0	0	0	0	0	0	0	0
mmu-miR-1929-5p	mmu-mir-1929	102	5.97	52	4.56	102	5.34	79	4.88
mmu-miR-1929-3p	mmu-mir-1929	1	0.06	1	0.09	0	0	0	0
mmu-miR-1930-5p	mmu-mir-1930	80	4.69	58	5.08	90	4.72	73	4.51
mmu-miR-1930-3p	mmu-mir-1930	2	0.12	2	0.18	5	0.26	3	0.19
mmu-miR-1931	mmu-mir-1931	30	1.76	32.5	2.85	41.75	2.19	35.75	2.21
mmu-miR-1932	mmu-mir-1932	16	0.94	15	1.31	17	0.89	20	1.23
mmu-miR-1933-5p	mmu-mir-1933	23	1.35	20	1.75	40	2.1	33	2.04
mmu-miR-1933-3p	mmu-mir-1933	435	25.48	357	31.29	397	20.8	413	25.5
mmu-miR-1934-5p	mmu-mir-1934	106	6.21	107	9.38	135	7.07	88	5.43
mmu-miR-1934-3p	mmu-mir-1934	48	2.81	30	2.63	31	1.62	22	1.36
mmu-miR-1936	mmu-mir-1936	29	1.7	21	1.84	31	1.62	39	2.41
mmu-miR-1938	mmu-mir-1938	25	1.46	16	1.4	35	1.83	21	1.3
mmu-miR-193a-5p	mmu-mir-193a	17	1	8	0.7	25	1.31	15	0.93
mmu-miR-193a-3p	mmu-mir-193a	0	0	1	0.09	6	0.31	4	0.25
mmu-miR-193b-5p	mmu-mir-193b	1	0.06	0	0	0	0	0	0
mmu-miR-193b-3p	mmu-mir-193b	1	0.06	2	0.18	0	0	0	0
mmu-miR-194-5p	mmu-mir-194-1	226.5	13.27	130	11.39	344.5	18.05	200.5	12.38
mmu-miR-194-1-3p	mmu-mir-194-1	0	0	0	0	2	0.1	1	0.06
mmu-miR-194-5p	mmu-mir-194-2	498.5	29.2	291	25.5	734.5	38.48	411.5	25.41
mmu-miR-194-2-3p	mmu-mir-194-2	51	2.99	31	2.72	43	2.25	46	2.84
mmu-miR-1941-5p	mmu-mir-1941	0	0	0	0	0	0	2	0.12
mmu-miR-1941-3p	mmu-mir-1941	6	0.35	2	0.18	2	0.1	2	0.12
mmu-miR-1942	mmu-mir-1942	0	0	0	0	0	0	0	0
mmu-miR-1943-5p	mmu-mir-1943	196	11.48	196	17.18	304	15.93	202	12.47
mmu-miR-1943-3p	mmu-mir-1943	25	1.46	28	2.45	42	2.2	32	1.98
mmu-miR-1945	mmu-mir-1945	34	1.99	34	2.98	44	2.31	38	2.35
mmu-miR-1946a	mmu-mir-1946a	3.5	0.2	3.5	0.31	5	0.26	5	0.31
mmu-miR-1946b	mmu-mir-1946b	1.5	0.09	5.5	0.48	1	0.05	4	0.25
mmu-miR-1947-5p	mmu-mir-1947	174	10.19	164	14.37	260	13.62	170	10.5
mmu-miR-1947-3p	mmu-mir-1947	0	0	4	0.35	0	0	0	0
mmu-miR-1948-5p	mmu-mir-1948	0	0	19	1.67	105	5.5	0	0
mmu-miR-1948-3p	mmu-mir-1948	0	0	3	0.26	2	0.1	0	0
mmu-miR-1949	mmu-mir-1949	5	0.29	2	0.18	13	0.68	9	0.56
mmu-miR-1950	mmu-mir-1950	18	1.05	18	1.58	15	0.79	17	1.05
mmu-miR-1951	mmu-mir-1951	2	0.12	1	0.09	0	0	1	0.06
mmu-miR-1952	mmu-mir-1952	0	0	0	0	0	0	0	0
mmu-miR-1953	mmu-mir-1953	112	6.56	79	6.92	100	5.24	77	4.75
mmu-miR-1954	mmu-mir-1954	10	0.59	4	0.35	4	0.21	8	0.49
mmu-miR-1955-5p	mmu-mir-1955	19	1.11	17	1.49	31	1.62	15	0.93
mmu-miR-1955-3p	mmu-mir-1955	6	0.35	2	0.18	8	0.42	12	0.74
mmu-miR-1956	mmu-mir-1956	11	0.64	5	0.44	9	0.47	11	0.68
mmu-miR-1958	mmu-mir-1958	18	1.05	14	1.23	23	1.2	27	1.67
mmu-miR-195a-5p	mmu-mir-195a	28.33	1.66	27.33	2.4	41.67	2.18	30	1.85
mmu-miR-195a-3p	mmu-mir-195a	34	1.99	24	2.1	25	1.31	19	1.17
mmu-miR-195b	mmu-mir-195b	0	0	0	0	0	0	0	0
mmu-miR-1960	mmu-mir-1960	18	1.05	13	1.14	14	0.73	11	0.68
mmu-miR-1961	mmu-mir-1961	4.5	0.26	7	0.61	22	1.15	12.5	0.77
mmu-miR-1962	mmu-mir-1962	0	0	0	0	0	0	0	0
mmu-miR-1963	mmu-mir-1963	0	0	0	0	0	0	0	0
mmu-miR-1964-5p	mmu-mir-1964	0	0	3	0.26	0	0	0	0
mmu-miR-1964-3p	mmu-mir-1964	2784	163.06	2174	190.52	1751	91.73	2952	182.28
mmu-miR-1966-5p	mmu-mir-1966	0	0	3	0.26	1	0.05	1	0.06
mmu-miR-1966-3p	mmu-mir-1966	11	0.64	5	0.44	8	0.42	13	0.8
mmu-miR-1967	mmu-mir-1967	0	0	0	0	0	0	0	0
mmu-miR-1968-5p	mmu-mir-1968	8	0.47	12	1.05	20	1.05	7	0.43
mmu-miR-1968-3p	mmu-mir-1968	0	0	0	0	0	0	0	0
mmu-miR-1969	mmu-mir-1969	211	12.36	114	9.99	201	10.53	104	6.42
mmu-miR-196a-5p	mmu-mir-196a-1	1	0.06	1.5	0.13	0	0	0	0
mmu-miR-196a-1-3p	mmu-mir-196a-1	0	0	0	0	0	0	0	0
mmu-miR-196a-5p	mmu-mir-196a-2	0.5	0.03	1.5	0.13	0	0	0	0
mmu-miR-196a-2-3p	mmu-mir-196a-2	0	0	0	0	0	0	0	0
mmu-miR-196b-5p	mmu-mir-196b	23.5	1.38	15	1.31	12	0.63	18	1.11
mmu-miR-196b-3p	mmu-mir-196b	0	0	0	0	0	0	0	0
mmu-miR-1970	mmu-mir-1970	8	0.47	5	0.44	9	0.47	5	0.31
mmu-miR-1970b-5p	mmu-mir-1970b	1	0.06	0	0	0	0	0	0
mmu-miR-1970c-5p	mmu-mir-1970c	8	0.47	3	0.26	8	0.42	4	0.25
mmu-miR-1970c-3p	mmu-mir-1970c	0	0	0	0	0	0	0	0
mmu-miR-1971	mmu-mir-1971	0	0	0	0	0	0	0	0
mmu-miR-1981-5p	mmu-mir-1981	3773	220.99	2339	204.98	2935	153.76	2979	183.95
mmu-miR-1981-3p	mmu-mir-1981	442	25.89	335	29.36	553	28.97	555	34.27
mmu-miR-1982-5p	mmu-mir-1982	2	0.12	0	0	0	0	0	0
mmu-miR-1982-3p	mmu-mir-1982	21	1.23	14	1.23	36	1.89	28	1.73
mmu-miR-1983	mmu-mir-1983	762	44.63	564	49.43	584	30.6	708	43.72
mmu-miR-199a-5p	mmu-mir-199a-1	37	2.17	17	1.49	32	1.68	26.5	1.64
mmu-miR-199a-3p	mmu-mir-199a-1	53.33	3.12	42.33	3.71	69.33	3.63	52	3.21
mmu-miR-199a-5p	mmu-mir-199a-2	37	2.17	17	1.49	32	1.68	26.5	1.64
mmu-miR-199a-3p	mmu-mir-199a-2	54.33	3.18	42.33	3.71	69.33	3.63	52	3.21
mmu-miR-199b-5p	mmu-mir-199b	3	0.18	3	0.26	5	0.26	4	0.25
mmu-miR-199b-3p	mmu-mir-199b	53.33	3.12	42.33	3.71	69.33	3.63	52	3.21
mmu-miR-19a-5p	mmu-mir-19a	1	0.06	1	0.09	0	0	0	0
mmu-miR-19a-3p	mmu-mir-19a	548.5	32.13	411.83	36.09	492	25.78	402.5	24.85
mmu-miR-19b-3p	mmu-mir-19b-1	1049	61.44	707.83	62.03	971.5	50.9	868.5	53.63
mmu-miR-19b-1-5p	mmu-mir-19b-1	9	0.53	6	0.53	9	0.47	3	0.19
mmu-miR-19b-2-5p	mmu-mir-19b-2	0	0	0	0	0	0	0	0
mmu-miR-19b-3p	mmu-mir-19b-2	1073.5	62.88	722.33	63.3	992.5	52	883	54.52
mmu-miR-1a-1-5p	mmu-mir-1a-1	0	0	0	0	0	0	0	0
mmu-miR-1a-3p	mmu-mir-1a-1	7	0.41	8.5	0.74	5	0.26	13	0.8
mmu-miR-1a-3p	mmu-mir-1a-2	7	0.41	8.5	0.74	5	0.26	11	0.68
mmu-miR-1a-2-5p	mmu-mir-1a-2	0	0	0	0	0	0	0	0
mmu-miR-1b-5p	mmu-mir-1b	3	0.18	1	0.09	12	0.63	9	0.56
mmu-miR-1b-3p	mmu-mir-1b	6	0.35	7	0.61	12	0.63	1	0.06
mmu-miR-200a-5p	mmu-mir-200a	248	14.53	183	16.04	140	7.33	219	13.52
mmu-miR-200a-3p	mmu-mir-200a	922.5	54.03	698.5	61.21	784	41.07	777.5	48.01
mmu-miR-200b-5p	mmu-mir-200b	73	4.28	98	8.59	69	3.61	68	4.2
mmu-miR-200b-3p	mmu-mir-200b	8746.5	512.29	8071	707.3	6836.5	358.16	8260.5	510.08
mmu-miR-200c-5p	mmu-mir-200c	0	0	0	0	0	0	0	0
mmu-miR-200c-3p	mmu-mir-200c	554.5	32.48	509	44.61	540.5	28.32	501	30.94
mmu-miR-201-5p	mmu-mir-201	0	0	0	0	0	0	0	0
mmu-miR-201-3p	mmu-mir-201	0	0	0	0	0	0	0	0
mmu-miR-202-5p	mmu-mir-202	2	0.12	0	0	3	0.16	1	0.06
mmu-miR-202-3p	mmu-mir-202	0	0	0	0	0	0	0	0
mmu-miR-203-5p	mmu-mir-203	0	0	0	0	0	0	0	0
mmu-miR-203-3p	mmu-mir-203	30	1.76	14	1.23	40	2.1	23	1.42
mmu-miR-203b-5p	mmu-mir-203b	0	0	0	0	0	0	0	0
mmu-miR-203b-3p	mmu-mir-203b	0	0	0	0	0	0	0	0
mmu-miR-204-5p	mmu-mir-204	0	0	0	0	0	0	0	0
mmu-miR-204-3p	mmu-mir-204	0	0	0	0	0	0	0	0
mmu-miR-205-5p	mmu-mir-205	3	0.18	0	0	0	0	1	0.06
mmu-miR-205-3p	mmu-mir-205	0	0	0	0	0	0	0	0
mmu-miR-206-5p	mmu-mir-206	0	0	0	0	0	0	0	0
mmu-miR-206-3p	mmu-mir-206	2	0.12	0	0	0	0	0	0
mmu-miR-207	mmu-mir-207	0	0	0	0	0	0	0	0
mmu-miR-208a-5p	mmu-mir-208a	0	0	0	0	0	0	0	0
mmu-miR-208a-3p	mmu-mir-208a	0	0	0	0	0	0	0	0
mmu-miR-208b-5p	mmu-mir-208b	0	0	0	0	0	0	0	0
mmu-miR-208b-3p	mmu-mir-208b	0	0	0	0	0	0	0	0
mmu-miR-20a-5p	mmu-mir-20a	20941.7	1226.56	15771.2	1382.11	21824.5	1143.38	15041.8	928.82
mmu-miR-20a-3p	mmu-mir-20a	18	1.05	10	0.88	10	0.52	12	0.74
mmu-miR-20b-5p	mmu-mir-20b	29.17	1.71	27.33	2.4	33	1.73	20.67	1.28
mmu-miR-20b-3p	mmu-mir-20b	0	0	0	0	0	0	0	0
mmu-miR-210-5p	mmu-mir-210	253	14.82	174	15.25	201	10.53	220	13.58
mmu-miR-210-3p	mmu-mir-210	5717	334.85	3273	286.83	6091	319.11	5090	314.3
mmu-miR-211-5p	mmu-mir-211	4	0.23	0	0	0	0	0	0
mmu-miR-211-3p	mmu-mir-211	0	0	0	0	0	0	0	0
mmu-miR-212-5p	mmu-mir-212	426	24.95	321	28.13	261	13.67	470	29.02
mmu-miR-212-3p	mmu-mir-212	42	2.46	33	2.89	43	2.25	56	3.46
mmu-miR-2136	mmu-mir-2136	0	0	0	0	0	0	0	0
mmu-miR-2137	mmu-mir-2137	6	0.35	1	0.09	5	0.26	6	0.37
mmu-miR-2139	mmu-mir-2139	0	0	0	0	0	0	0	0
mmu-miR-214-5p	mmu-mir-214	1	0.06	0	0	3	0.16	1	0.06
mmu-miR-214-3p	mmu-mir-214	3	0.18	5	0.44	2	0.1	2	0.12
mmu-miR-215-5p	mmu-mir-215	60.5	3.54	33	2.89	34	1.78	43	2.66
mmu-miR-215-3p	mmu-mir-215	0	0	0	0	0	0	0	0
mmu-miR-216a-5p	mmu-mir-216a	0	0	0	0	0	0	0	0
mmu-miR-216a-3p	mmu-mir-216a	0	0	0	0	0	0	0	0
mmu-miR-216b-5p	mmu-mir-216b	0	0	0	0	0	0	0	0
mmu-miR-216b-3p	mmu-mir-216b	0	0	0	0	0	0	0	0
mmu-miR-216c-5p	mmu-mir-216c	0	0	0	0	0	0	0	0
mmu-miR-216c-3p	mmu-mir-216c	0	0	0	0	0	0	0	0
mmu-miR-217-5p	mmu-mir-217	0	0	1	0.09	0	0	0	0
mmu-miR-217-3p	mmu-mir-217	0	0	0	0	0	0	0	0
mmu-miR-218-5p	mmu-mir-218-1	0.5	0.03	0.5	0.04	0.5	0.03	3	0.19
mmu-miR-218-1-3p	mmu-mir-218-1	0	0	0	0	0	0	0	0
mmu-miR-218-5p	mmu-mir-218-2	0.5	0.03	0.5	0.04	0.5	0.03	3	0.19
mmu-miR-218-2-3p	mmu-mir-218-2	0	0	0	0	0	0	0	0
mmu-miR-2183	mmu-mir-2183	0	0	0	0	0	0	0	0
mmu-miR-219a-5p	mmu-mir-219a-1	8	0.47	3	0.26	6	0.31	3	0.19
mmu-miR-219a-1-3p	mmu-mir-219a-1	68	3.98	42	3.68	79	4.14	68	4.2
mmu-miR-219a-5p	mmu-mir-219a-2	1	0.06	0	0	0	0	0	0
mmu-miR-219a-2-3p	mmu-mir-219a-2	0	0	0	0	0	0	0	0
mmu-miR-219b-5p	mmu-mir-219b	3	0.18	0	0	6	0.31	2	0.12
mmu-miR-219b-3p	mmu-mir-219b	0	0	2	0.18	2	0.1	0	0
mmu-miR-219c-5p	mmu-mir-219c	4	0.23	0	0	7	0.37	2	0.12
mmu-miR-219c-3p	mmu-mir-219c	0	0	0	0	0	0	0	0
mmu-miR-21a-5p	mmu-mir-21a	6.4713e+06	379027	3.89552e+06	341385	6.36863e+06	333652	5.73906e+06	354381
mmu-miR-21a-3p	mmu-mir-21a	675	39.54	312	27.34	742	38.87	421	26
mmu-miR-21b	mmu-mir-21b	39.67	2.32	30.33	2.66	77.83	4.08	63.83	3.94
mmu-miR-21c	mmu-mir-21c	35.17	2.06	27.33	2.4	74.83	3.92	56.33	3.48
mmu-miR-22-5p	mmu-mir-22	3523	206.34	2279	199.72	3159	165.5	3213	198.4
mmu-miR-22-3p	mmu-mir-22	61306	3590.72	41353	3623.98	63797	3342.32	60973	3765.02
mmu-miR-221-5p	mmu-mir-221	41478	2429.39	31598	2769.1	41123	2154.43	43892	2710.29
mmu-miR-221-3p	mmu-mir-221	467935	27407.2	383252	33586.4	473540	24808.7	461535	28499.3
mmu-miR-222-5p	mmu-mir-222	5894	345.21	4351	381.3	6913	362.17	8482	523.75
mmu-miR-222-3p	mmu-mir-222	249612	14619.9	256050	22439	286244	14996.3	273468	16886.4
mmu-miR-223-5p	mmu-mir-223	9420	551.73	7648	670.23	15514	812.78	9455	583.84
mmu-miR-223-3p	mmu-mir-223	26868	1573.67	16731	1466.22	31228	1636.03	24344	1503.22
mmu-miR-224-5p	mmu-mir-224	0	0	2	0.18	0	0	0	0
mmu-miR-224-3p	mmu-mir-224	0	0	0	0	0	0	0	0
mmu-miR-23a-5p	mmu-mir-23a	158	9.25	126	11.04	221	11.58	132	8.15
mmu-miR-23a-3p	mmu-mir-23a	152711	8944.36	100670	8822.19	149673	7841.36	144248	8907.17
mmu-miR-23b-5p	mmu-mir-23b	711	41.64	705	61.78	1108	58.05	893	55.14
mmu-miR-23b-3p	mmu-mir-23b	116037	6796.35	78018.5	6837.17	96994	5081.51	105534	6516.62
mmu-miR-24-1-5p	mmu-mir-24-1	511.5	29.96	302	26.47	502	26.3	499	30.81
mmu-miR-24-3p	mmu-mir-24-1	141682	8298.41	98412	8624.35	161938	8483.95	142496	8798.98
mmu-miR-24-3p	mmu-mir-24-2	141702	8299.59	98421	8625.14	161950	8484.57	142507	8799.66
mmu-miR-24-2-5p	mmu-mir-24-2	23367.5	1368.65	14471	1268.17	25307	1325.83	22519	1390.53
mmu-miR-25-5p	mmu-mir-25	346	20.27	261	22.87	361	18.91	236	14.57
mmu-miR-25-3p	mmu-mir-25	86648	5075.02	78158.5	6849.44	113152	5928.02	83287.5	5142.92
mmu-miR-26a-5p	mmu-mir-26a-1	91446.7	5356.08	68358.2	5990.58	131974	6914.12	90842.7	5609.44
mmu-miR-26a-1-3p	mmu-mir-26a-1	13	0.76	11	0.96	14	0.73	9	0.56
mmu-miR-26a-5p	mmu-mir-26a-2	91468.7	5357.37	68368.2	5991.46	131995	6915.22	90865.7	5610.86
mmu-miR-26a-2-3p	mmu-mir-26a-2	842	49.32	562	49.25	762	39.92	559	34.52
mmu-miR-26b-5p	mmu-mir-26b	40396.7	2366.05	29934.7	2623.33	47579.7	2492.7	36468.7	2251.9
mmu-miR-26b-3p	mmu-mir-26b	112	6.56	76	6.66	147	7.7	79	4.88
mmu-miR-27a-5p	mmu-mir-27a	25748	1508.07	15956	1398.31	28825	1510.14	26536	1638.57
mmu-miR-27a-3p	mmu-mir-27a	94700.5	5546.66	64433.5	5646.64	124632	6529.49	100376	6198.12
mmu-miR-27b-5p	mmu-mir-27b	6941	406.54	5608	491.46	6558	343.57	7069	436.5
mmu-miR-27b-3p	mmu-mir-27b	1.77596e+06	104019	1.13193e+06	99197.2	2.01693e+06	105667	1880470	116117
mmu-miR-2861	mmu-mir-2861	0	0	0	0	0	0	0	0
mmu-miR-28a-5p	mmu-mir-28a	801.5	46.94	450.5	39.48	963	50.45	682.5	42.14
mmu-miR-28a-3p	mmu-mir-28a	2030	118.9	1579	138.38	2765	144.86	2195	135.54
mmu-miR-28b	mmu-mir-28b	0	0	0	0	0	0	0	0
mmu-miR-28c	mmu-mir-28c	0	0	0	0	0	0	0	0
mmu-miR-290a-5p	mmu-mir-290a	0	0	0	0	0	0	0	0
mmu-miR-290a-3p	mmu-mir-290a	0	0	0	0	0	0	0	0
mmu-miR-290b-5p	mmu-mir-290b	0	0	0	0	0	0	0	0
mmu-miR-290b-3p	mmu-mir-290b	0	0	0	0	0	0	0	0
mmu-miR-291a-5p	mmu-mir-291a	0	0	0	0	0	0	0	0
mmu-miR-291a-3p	mmu-mir-291a	0	0	0	0	0	0	0	0
mmu-miR-291b-5p	mmu-mir-291b	0	0	0	0	0	0	0	0
mmu-miR-291b-3p	mmu-mir-291b	0	0	0	0	0	0	0	0
mmu-miR-292a-5p	mmu-mir-292a	0	0	0	0	1	0.05	0	0
mmu-miR-292a-3p	mmu-mir-292a	0	0	0	0	0	0	0	0
mmu-miR-292b-5p	mmu-mir-292b	0	0	0	0	0	0	0	0
mmu-miR-292b-3p	mmu-mir-292b	0	0	0	0	0	0	0	0
mmu-miR-293-5p	mmu-mir-293	0	0	0	0	0	0	0	0
mmu-miR-293-3p	mmu-mir-293	0	0	0	0	0	0	0	0
mmu-miR-294-5p	mmu-mir-294	0	0	0	0	0	0	0	0
mmu-miR-294-3p	mmu-mir-294	0	0	0	0	0	0	0	0
mmu-miR-295-5p	mmu-mir-295	0	0	0	0	0	0	0	0
mmu-miR-295-3p	mmu-mir-295	0	0	0	0	0	0	0	0
mmu-miR-296-5p	mmu-mir-296	15	0.88	15	1.31	101	5.29	23	1.42
mmu-miR-296-3p	mmu-mir-296	57	3.34	58	5.08	157	8.23	110	6.79
mmu-miR-297a-5p	mmu-mir-297a-1	2.5	0.15	0.5	0.04	0.5	0.03	1	0.06
mmu-miR-297a-5p	mmu-mir-297a-2	2.59	0.15	0.5	0.04	0.5	0.03	1	0.06
mmu-miR-297a-5p	mmu-mir-297a-3	2.59	0.15	0.5	0.04	0.5	0.03	1	0.06
mmu-miR-297a-3p	mmu-mir-297a-3	2	0.12	2	0.18	1.95	0.1	2.95	0.18
mmu-miR-297a-5p	mmu-mir-297a-4	2.59	0.15	0.5	0.04	0.5	0.03	1	0.06
mmu-miR-297a-3p	mmu-mir-297a-4	2	0.12	2	0.18	1.95	0.1	2.95	0.18
mmu-miR-297b-5p	mmu-mir-297b	10	0.59	13	1.14	19	1	7	0.43
mmu-miR-297b-3p	mmu-mir-297b	2	0.12	2	0.18	1.95	0.1	2.95	0.18
mmu-miR-297c-5p	mmu-mir-297c	1	0.06	0	0	0	0	0	0
mmu-miR-297c-3p	mmu-mir-297c	2	0.12	2	0.18	1.95	0.1	2.95	0.18
mmu-miR-298-5p	mmu-mir-298	164	9.61	106	9.29	798	41.81	236	14.57
mmu-miR-298-3p	mmu-mir-298	0	0	0	0	0	0	0	0
mmu-miR-299a-5p	mmu-mir-299a	0	0	0	0	0	0	0	0
mmu-miR-299a-3p	mmu-mir-299a	0	0	0	0	0	0	0	0
mmu-miR-299b-5p	mmu-mir-299b	0	0	0	0	0	0	0	0
mmu-miR-299b-3p	mmu-mir-299b	0	0	0	0	0	0	0	0
mmu-miR-29a-5p	mmu-mir-29a	110	6.44	51	4.47	50	2.62	73	4.51
mmu-miR-29a-3p	mmu-mir-29a	21992.7	1288.12	15753	1380.52	26313.2	1378.54	19772.7	1220.94
mmu-miR-29b-1-5p	mmu-mir-29b-1	108	6.33	95	8.33	130.5	6.84	107	6.61
mmu-miR-29b-3p	mmu-mir-29b-1	681.17	39.9	360.83	31.62	481.83	25.24	398.33	24.6
mmu-miR-29b-3p	mmu-mir-29b-2	684.17	40.07	361.83	31.71	483.83	25.35	398.33	24.6
mmu-miR-29b-2-5p	mmu-mir-29b-2	67	3.92	51	4.47	89	4.66	59	3.64
mmu-miR-29c-5p	mmu-mir-29c	223	13.06	165	14.46	183	9.59	225	13.89
mmu-miR-29c-3p	mmu-mir-29c	167	9.78	112.33	9.84	192.17	10.07	139.67	8.62
mmu-miR-300-5p	mmu-mir-300	0	0	0	0	0	0	0	0
mmu-miR-300-3p	mmu-mir-300	0	0	0	0	0	0	0	0
mmu-miR-301a-5p	mmu-mir-301a	936	54.82	628	55.03	842	44.11	789	48.72
mmu-miR-301a-3p	mmu-mir-301a	158	9.25	97	8.5	104	5.45	102	6.3
mmu-miR-301b-5p	mmu-mir-301b	69	4.04	47	4.12	45	2.36	70	4.32
mmu-miR-301b-3p	mmu-mir-301b	84	4.92	60	5.26	87	4.56	61	3.77
mmu-miR-302a-5p	mmu-mir-302a	0	0	0	0	0	0	0	0
mmu-miR-302a-3p	mmu-mir-302a	0	0	0	0	0	0	0	0
mmu-miR-302b-5p	mmu-mir-302b	0	0	0	0	0	0	0	0
mmu-miR-302b-3p	mmu-mir-302b	0	0	0	0	0	0	0	0
mmu-miR-302c-5p	mmu-mir-302c	0	0	0	0	0	0	0	0
mmu-miR-302c-3p	mmu-mir-302c	0	0	0	0	0	0	0	0
mmu-miR-302d-5p	mmu-mir-302d	0	0	0	0	0	0	0	0
mmu-miR-302d-3p	mmu-mir-302d	0	0	0	0	0	0	0	0
mmu-miR-3057-5p	mmu-mir-3057	223	13.06	164	14.37	252	13.2	186	11.49
mmu-miR-3057-3p	mmu-mir-3057	3	0.18	6	0.53	3	0.16	5	0.31
mmu-miR-3058-5p	mmu-mir-3058	0	0	0	0	6	0.31	0	0
mmu-miR-3058-3p	mmu-mir-3058	3	0.18	3	0.26	5	0.26	0	0
mmu-miR-3059-5p	mmu-mir-3059	0	0	0	0	0	0	0	0
mmu-miR-3059-3p	mmu-mir-3059	0	0	0	0	0	0	0	0
mmu-miR-3060-5p	mmu-mir-3060	0	0	0	0	0	0	0	0
mmu-miR-3060-3p	mmu-mir-3060	35	2.05	47	4.12	54	2.83	38	2.35
mmu-miR-3061-5p	mmu-mir-3061	49	2.87	25	2.19	23	1.2	38	2.35
mmu-miR-3061-3p	mmu-mir-3061	25	1.46	31	2.72	44	2.31	28	1.73
mmu-miR-3062-5p	mmu-mir-3062	22	1.29	21	1.84	12	0.63	13	0.8
mmu-miR-3062-3p	mmu-mir-3062	0	0	0	0	0	0	0	0
mmu-miR-3063-5p	mmu-mir-3063	0	0	0	0	0	0	0	0
mmu-miR-3063-3p	mmu-mir-3063	0	0	0	0	0	0	0	0
mmu-miR-3064-5p	mmu-mir-3064	81	4.74	60	5.26	125	6.55	109	6.73
mmu-miR-3064-3p	mmu-mir-3064	3	0.18	1	0.09	0	0	1	0.06
mmu-miR-3065-5p	mmu-mir-3065	8	0.47	2	0.18	16	0.84	6	0.37
mmu-miR-3065-3p	mmu-mir-3065	2	0.12	0	0	1	0.05	0	0
mmu-miR-3066-5p	mmu-mir-3066	199	11.66	174	15.25	271	14.2	225	13.89
mmu-miR-3066-3p	mmu-mir-3066	27	1.58	21	1.84	31	1.62	26	1.61
mmu-miR-3067-5p	mmu-mir-3067	0	0	0	0	0	0	0	0
mmu-miR-3067-3p	mmu-mir-3067	0	0	0	0	0	0	0	0
mmu-miR-3068-5p	mmu-mir-3068	686	40.18	372	32.6	768	40.24	598	36.93
mmu-miR-3068-3p	mmu-mir-3068	1024	59.98	629	55.12	1325	69.42	991	61.19
mmu-miR-3069-5p	mmu-mir-3069	0	0	0	0	0	0	1	0.06
mmu-miR-3069-3p	mmu-mir-3069	20	1.17	15	1.31	20	1.05	15	0.93
mmu-miR-3070-5p	mmu-mir-3070-1	0	0	0	0	0	0	0	0
mmu-miR-3070-3p	mmu-mir-3070-1	0	0	0	0	0	0	0	0
mmu-miR-3070-5p	mmu-mir-3070-2	0	0	0	0	0	0	0	0
mmu-miR-3070-2-3p	mmu-mir-3070-2	0	0	0	0	0	0	0	0
mmu-miR-3071-5p	mmu-mir-3071	0	0	0	0	0	0	0	0
mmu-miR-3071-3p	mmu-mir-3071	0	0	0	0	0	0	0	0
mmu-miR-3072-5p	mmu-mir-3072	0	0	0	0	0	0	0	0
mmu-miR-3072-3p	mmu-mir-3072	0	0	0	0	0	0	0	0
mmu-miR-3073a-5p	mmu-mir-3073a	0	0	0	0	0	0	0	0
mmu-miR-3073a-3p	mmu-mir-3073a	0	0	0	0	0	0	0	0
mmu-miR-3073b-5p	mmu-mir-3073b	0	0	0	0	0	0	0	0
mmu-miR-3073b-3p	mmu-mir-3073b	0	0	0	0	0	0	0	0
mmu-miR-3074-5p	mmu-mir-3074-1	61.5	3.6	42	3.68	85	4.45	62.5	3.86
mmu-miR-3074-1-3p	mmu-mir-3074-1	8	0.47	4	0.35	19	1	5	0.31
mmu-miR-3074-5p	mmu-mir-3074-2	61.5	3.6	41	3.59	83	4.35	58.5	3.61
mmu-miR-3074-2-3p	mmu-mir-3074-2	1	0.06	0	0	0	0	0	0
mmu-miR-3075-5p	mmu-mir-3075	10	0.59	5	0.44	19	1	10	0.62
mmu-miR-3075-3p	mmu-mir-3075	0	0	0	0	0	0	0	0
mmu-miR-3076-5p	mmu-mir-3076	3	0.18	5	0.44	6	0.31	7	0.43
mmu-miR-3076-3p	mmu-mir-3076	13	0.76	10	0.88	7	0.37	6	0.37
mmu-miR-3077-5p	mmu-mir-3077	0	0	0	0	2	0.1	4	0.25
mmu-miR-3077-3p	mmu-mir-3077	1	0.06	1	0.09	3	0.16	7	0.43
mmu-miR-3078-5p	mmu-mir-3078	0	0	0	0	0	0	0	0
mmu-miR-3078-3p	mmu-mir-3078	0	0	0	0	0	0	0	0
mmu-miR-3079-5p	mmu-mir-3079	45	2.64	41	3.59	43	2.25	50	3.09
mmu-miR-3079-3p	mmu-mir-3079	0	0	0	0	1	0.05	0	0
mmu-miR-3080-5p	mmu-mir-3080	0	0	0	0	0	0	0	0
mmu-miR-3080-3p	mmu-mir-3080	0	0	0	0	0	0	0	0
mmu-miR-3081-5p	mmu-mir-3081	0	0	0	0	0	0	0	0
mmu-miR-3081-3p	mmu-mir-3081	3	0.18	1	0.09	2	0.1	5	0.31
mmu-miR-3082-5p	mmu-mir-3082	1.07	0.06	0	0	6.08	0.32	4.07	0.25
mmu-miR-3082-3p	mmu-mir-3082	58	3.4	46	4.03	80	4.19	83	5.13
mmu-miR-3083-5p	mmu-mir-3083	0	0	0	0	0	0	0	0
mmu-miR-3083-3p	mmu-mir-3083	0	0	0	0	0	0	0	0
mmu-miR-3083b-5p	mmu-mir-3083b	0	0	0	0	0	0	0	0
mmu-miR-3083b-3p	mmu-mir-3083b	0	0	0	0	0	0	0	0
mmu-miR-3084-5p	mmu-mir-3084-1	21.5	1.26	7.5	0.66	17	0.89	21.5	1.33
mmu-miR-3084-3p	mmu-mir-3084-1	12	0.7	2	0.18	8	0.42	12.5	0.77
mmu-miR-3084-5p	mmu-mir-3084-2	21.5	1.26	7.5	0.66	17	0.89	21.5	1.33
mmu-miR-3084-3p	mmu-mir-3084-2	12	0.7	2	0.18	8	0.42	12.5	0.77
mmu-miR-3085-5p	mmu-mir-3085	0	0	0	0	0	0	0	0
mmu-miR-3085-3p	mmu-mir-3085	0	0	0	0	0	0	0	0
mmu-miR-3086-5p	mmu-mir-3086	8	0.47	4	0.35	8	0.42	3	0.19
mmu-miR-3086-3p	mmu-mir-3086	0	0	0	0	0	0	0	0
mmu-miR-3087-5p	mmu-mir-3087	0	0	2	0.18	1	0.05	0	0
mmu-miR-3087-3p	mmu-mir-3087	6	0.35	6	0.53	11	0.58	2	0.12
mmu-miR-3088-5p	mmu-mir-3088	0	0	0	0	0	0	3	0.19
mmu-miR-3088-3p	mmu-mir-3088	2	0.12	2	0.18	4	0.21	3	0.19
mmu-miR-3089-5p	mmu-mir-3089	0	0	0	0	0	0	0	0
mmu-miR-3089-3p	mmu-mir-3089	47	2.75	35	3.07	36	1.89	45	2.78
mmu-miR-3090-5p	mmu-mir-3090	0	0	0	0	0	0	0	0
mmu-miR-3090-3p	mmu-mir-3090	0	0	0	0	0	0	0	0
mmu-miR-3091-5p	mmu-mir-3091	0	0	0	0	0	0	0	0
mmu-miR-3091-3p	mmu-mir-3091	16	0.94	1	0.09	5	0.26	8	0.49
mmu-miR-3092-5p	mmu-mir-3092	0	0	0	0	0	0	0	0
mmu-miR-3092-3p	mmu-mir-3092	0	0	3	0.26	1	0.05	0	0
mmu-miR-3093-5p	mmu-mir-3093	0	0	0	0	0	0	0	0
mmu-miR-3093-3p	mmu-mir-3093	0	0	0	0	0	0	0	0
mmu-miR-3094-5p	mmu-mir-3094	7	0.41	9	0.79	8	0.42	5	0.31
mmu-miR-3094-3p	mmu-mir-3094	2	0.12	1	0.09	0	0	0	0
mmu-miR-3095-5p	mmu-mir-3095	9	0.53	10	0.88	6	0.31	9	0.56
mmu-miR-3095-3p	mmu-mir-3095	79	4.63	57	5	113	5.92	67	4.14
mmu-miR-3097-5p	mmu-mir-3097	2	0.12	2	0.18	3	0.16	3	0.19
mmu-miR-3097-3p	mmu-mir-3097	1	0.06	1	0.09	6	0.31	3	0.19
mmu-miR-3098-5p	mmu-mir-3098	10	0.59	3	0.26	4	0.21	5	0.31
mmu-miR-3098-3p	mmu-mir-3098	31	1.82	30	2.63	48	2.51	25	1.54
mmu-miR-3099-5p	mmu-mir-3099	0	0	0	0	0	0	0	0
mmu-miR-3099-3p	mmu-mir-3099	0	0	0	0	0	0	0	0
mmu-miR-30a-5p	mmu-mir-30a	9755.5	571.38	7532.5	660.11	14816.3	776.23	9274.5	572.69
mmu-miR-30a-3p	mmu-mir-30a	1304.5	76.41	1182	103.58	2420	126.78	1478	91.27
mmu-miR-30b-5p	mmu-mir-30b	10364	607.02	5727.33	501.92	9519.67	498.73	9097	561.73
mmu-miR-30b-3p	mmu-mir-30b	3234	189.42	2117	185.52	3099	162.36	2843	175.55
mmu-miR-30c-5p	mmu-mir-30c-1	23825	1395.44	18304.3	1604.1	32212.2	1687.59	22943.5	1416.74
mmu-miR-30c-1-3p	mmu-mir-30c-1	360	21.09	189	16.56	370	19.38	329	20.32
mmu-miR-30c-5p	mmu-mir-30c-2	23825	1395.44	18304.3	1604.1	32212.2	1687.59	22943.5	1416.74
mmu-miR-30c-2-3p	mmu-mir-30c-2	110	6.44	74	6.49	221	11.58	128	7.9
mmu-miR-30d-5p	mmu-mir-30d	513842	30096	370868	32501.1	573138	30026.7	523688	32337.2
mmu-miR-30d-3p	mmu-mir-30d	1890	110.7	892.5	78.21	1663	87.12	1382	85.34
mmu-miR-30e-5p	mmu-mir-30e	17607.5	1031.28	12560.5	1100.74	16666.8	873.17	12595	777.73
mmu-miR-30e-3p	mmu-mir-30e	15179.5	889.07	15858.5	1389.76	20108	1053.46	15919	982.98
mmu-miR-30f	mmu-mir-30f	0	0	0	0	0	0	0	0
mmu-miR-31-5p	mmu-mir-31	4	0.23	9	0.79	21	1.1	17	1.05
mmu-miR-31-3p	mmu-mir-31	0	0	0	0	0	0	0	0
mmu-miR-3100-5p	mmu-mir-3100	0	0	2	0.18	0	0	3	0.19
mmu-miR-3100-3p	mmu-mir-3100	0	0	0	0	0	0	0	0
mmu-miR-3101-5p	mmu-mir-3101	9	0.53	2	0.18	7	0.37	9	0.56
mmu-miR-3101-3p	mmu-mir-3101	1	0.06	4	0.35	7	0.37	4	0.25
mmu-miR-3102-5p	mmu-mir-3102	0	0	0	0	0	0	0	0
mmu-miR-3102-5p.2-5p	mmu-mir-3102	1	0.06	0	0	1	0.05	0	0
mmu-miR-3102-3p.2-3p	mmu-mir-3102	0	0	0	0	0	0	0	0
mmu-miR-3102-3p	mmu-mir-3102	1	0.06	0	0	0	0	1	0.06
mmu-miR-3103-5p	mmu-mir-3103	1	0.06	0	0	0	0	1	0.06
mmu-miR-3103-3p	mmu-mir-3103	18	1.05	4	0.35	1	0.05	10	0.62
mmu-miR-3104-5p	mmu-mir-3104	0	0	0	0	0	0	0	0
mmu-miR-3104-3p	mmu-mir-3104	0	0	0	0	0	0	0	0
mmu-miR-3105-5p	mmu-mir-3105	0	0	0	0	0	0	0	0
mmu-miR-3105-3p	mmu-mir-3105	0	0	0	0	0	0	0	0
mmu-miR-3106-5p	mmu-mir-3106	0	0	0	0	0	0	0	0
mmu-miR-3106-3p	mmu-mir-3106	0	0	0	0	0	0	0	0
mmu-miR-3108-5p	mmu-mir-3108	2	0.12	0	0	0	0	0	0
mmu-miR-3108-3p	mmu-mir-3108	0	0	0	0	0	0	0	0
mmu-miR-3109-5p	mmu-mir-3109	13	0.76	9	0.79	5	0.26	10	0.62
mmu-miR-3109-3p	mmu-mir-3109	39	2.28	25	2.19	62	3.25	34	2.1
mmu-miR-3110-5p	mmu-mir-3110	24	1.41	12	1.05	28	1.47	17	1.05
mmu-miR-3110-3p	mmu-mir-3110	0	0	0	0	1	0.05	0	0
mmu-miR-3112-5p	mmu-mir-3112	5	0.29	2	0.18	3	0.16	4	0.25
mmu-miR-3112-3p	mmu-mir-3112	13	0.76	2	0.18	11	0.58	8	0.49
mmu-miR-3113-5p	mmu-mir-3113	0	0	0	0	1	0.05	3	0.19
mmu-miR-3113-3p	mmu-mir-3113	0	0	0	0	0	0	0	0
mmu-miR-3154	mmu-mir-3154	0	0	0	0	0	0	0	0
mmu-miR-32-5p	mmu-mir-32	1628	95.35	766	67.13	1194	62.55	840	51.87
mmu-miR-32-3p	mmu-mir-32	119	6.97	78	6.84	97	5.08	82	5.06
mmu-miR-320-5p	mmu-mir-320	1	0.06	1	0.09	0	0	4	0.25
mmu-miR-320-3p	mmu-mir-320	9121	534.22	7866	689.34	12058	631.72	8680	535.98
mmu-miR-322-5p	mmu-mir-322	1214	71.1	717	62.83	1312	68.74	963	59.46
mmu-miR-322-3p	mmu-mir-322	4347	254.61	3214	281.66	5891	308.63	4712	290.96
mmu-miR-323-5p	mmu-mir-323	0	0	0	0	0	0	0	0
mmu-miR-323-3p	mmu-mir-323	0	0	0	0	0	0	0	0
mmu-miR-324-5p	mmu-mir-324	226	13.24	158	13.85	179	9.38	193	11.92
mmu-miR-324-3p	mmu-mir-324	392	22.96	259	22.7	501	26.25	295	18.22
mmu-miR-325-5p	mmu-mir-325	0	0	0	0	0	0	0	0
mmu-miR-325-3p	mmu-mir-325	0	0	0	0	0	0	0	0
mmu-miR-326-5p	mmu-mir-326	0	0	0	0	0	0	0	0
mmu-miR-326-3p	mmu-mir-326	3035	177.76	1882	164.93	3217	168.54	3534	218.22
mmu-miR-327	mmu-mir-327	0	0	0	0	0	0	0	0
mmu-miR-328-5p	mmu-mir-328	0	0	0	0	0	0	0	0
mmu-miR-328-3p	mmu-mir-328	14409.5	843.97	13024.5	1141.4	20261.5	1061.5	16095	993.85
mmu-miR-329-5p	mmu-mir-329	0	0	0	0	0	0	0	0
mmu-miR-329-3p	mmu-mir-329	0	0	0	0	0	0	0	0
mmu-miR-33-5p	mmu-mir-33	49	2.87	22	1.93	31	1.62	32	1.98
mmu-miR-33-3p	mmu-mir-33	71	4.16	29	2.54	80	4.19	42	2.59
mmu-miR-330-5p	mmu-mir-330	1143	66.95	907	79.49	1258	65.91	1123	69.34
mmu-miR-330-3p	mmu-mir-330	976	57.16	846	74.14	1077	56.42	833	51.44
mmu-miR-331-5p	mmu-mir-331	148	8.67	103	9.03	133	6.97	116	7.16
mmu-miR-331-3p	mmu-mir-331	667	39.07	375	32.86	589	30.86	606	37.42
mmu-miR-335-5p	mmu-mir-335	0	0	1	0.09	0	0	2	0.12
mmu-miR-335-3p	mmu-mir-335	0	0	2	0.18	1	0.05	0	0
mmu-miR-337-5p	mmu-mir-337	0	0	0	0	0	0	0	0
mmu-miR-337-3p	mmu-mir-337	0	0	0	0	0	0	0	0
mmu-miR-338-5p	mmu-mir-338	1572	92.07	1176	103.06	1975	103.47	1651	101.95
mmu-miR-338-3p	mmu-mir-338	71	4.16	40	3.51	65	3.41	63	3.89
mmu-miR-339-5p	mmu-mir-339	4514	264.39	3081	270	6611	346.35	3834	236.75
mmu-miR-339-3p	mmu-mir-339	748	43.81	381	33.39	992	51.97	691	42.67
mmu-miR-340-5p	mmu-mir-340	77240	4523.99	48644	4262.93	95209	4987.99	62325	3848.51
mmu-miR-340-3p	mmu-mir-340	4924	288.4	3756	329.16	5458	285.94	4660	287.75
mmu-miR-341-5p	mmu-mir-341	0	0	0	0	0	0	0	0
mmu-miR-341-3p	mmu-mir-341	1	0.06	0	0	0	0	0	0
mmu-miR-342-5p	mmu-mir-342	1013	59.33	926	81.15	1011	52.97	952	58.79
mmu-miR-342-3p	mmu-mir-342	12782	748.65	8357	732.37	8849	463.6	12210	753.96
mmu-miR-343	mmu-mir-343	0	0	0	0	0	0	0	0
mmu-miR-344-5p	mmu-mir-344-1	0	0	0	0	0	0	0	0
mmu-miR-344-3p	mmu-mir-344-1	0	0	0	0	0	0	0	0
mmu-miR-344-5p	mmu-mir-344-2	0	0	0	0	0	0	0	0
mmu-miR-344-3p	mmu-mir-344-2	0	0	0	0	0	0	0	0
mmu-miR-344b-5p	mmu-mir-344b	0	0	0	0	0	0	0	0
mmu-miR-344b-3p	mmu-mir-344b	0	0	0	0	0	0	0	0
mmu-miR-344c-5p	mmu-mir-344c	0	0	0	0	0	0	0	0
mmu-miR-344c-3p	mmu-mir-344c	0	0	0	0	0	0	0	0
mmu-miR-344d-3p	mmu-mir-344d-1	0	0	1	0.09	0	0	0.67	0.04
mmu-miR-344d-1-5p	mmu-mir-344d-1	0	0	0	0	0	0	0	0
mmu-miR-344d-3p	mmu-mir-344d-2	0	0	1	0.09	0	0	0.67	0.04
mmu-miR-344d-2-5p	mmu-mir-344d-2	0	0	0	0	0	0	0	0
mmu-miR-344d-3-5p	mmu-mir-344d-3	0	0	0	0	0	0	0	0
mmu-miR-344d-3p	mmu-mir-344d-3	0	0	1	0.09	0	0	0.67	0.04
mmu-miR-344e-5p	mmu-mir-344e	0	0	0	0	0	0	0	0
mmu-miR-344e-3p	mmu-mir-344e	0	0	0	0	0	0	0	0
mmu-miR-344f-5p	mmu-mir-344f	0	0	0	0	0	0	0	0
mmu-miR-344f-3p	mmu-mir-344f	0	0	0	0	0	0	0	0
mmu-miR-344g-5p	mmu-mir-344g	0	0	0	0	0	0	0	0
mmu-miR-344g-3p	mmu-mir-344g	0	0	0	0	0	0	0	0
mmu-miR-344h-5p	mmu-mir-344h-1	0	0	0	0	0	0	0	0
mmu-miR-344h-3p	mmu-mir-344h-1	0	0	0	0	0	0	0	0
mmu-miR-344h-5p	mmu-mir-344h-2	0	0	0	0	0	0	0	0
mmu-miR-344h-3p	mmu-mir-344h-2	0	0	0	0	0	0	0	0
mmu-miR-344i	mmu-mir-344i	0	0	0	0	0	0	0	0
mmu-miR-345-5p	mmu-mir-345	53	3.1	23	2.02	26	1.36	39	2.41
mmu-miR-345-3p	mmu-mir-345	241	14.12	205	17.97	256	13.41	286	17.66
mmu-miR-346-5p	mmu-mir-346	0	0	0	0	0	0	0	0
mmu-miR-346-3p	mmu-mir-346	0	0	0	0	0	0	0	0
mmu-miR-3470a	mmu-mir-3470a	13.5	0.79	10	0.88	19	1	15	0.93
mmu-miR-3470b	mmu-mir-3470b	31.5	1.84	19	1.67	53	2.78	63	3.89
mmu-miR-3471	mmu-mir-3471-1	0.5	0.03	0	0	0	0	0	0
mmu-miR-3471	mmu-mir-3471-2	0.5	0.03	0	0	0	0	0	0
mmu-miR-3472	mmu-mir-3472	0	0	0	0	0	0	0	0
mmu-miR-3473a	mmu-mir-3473a	4	0.23	1.33	0.12	2.33	0.12	3.33	0.21
mmu-miR-3473b	mmu-mir-3473b	9.17	0.54	7	0.61	12.17	0.64	12	0.74
mmu-miR-3473c	mmu-mir-3473c	1	0.06	0	0	0	0	0	0
mmu-miR-3473d	mmu-mir-3473d	82	4.8	53	4.64	46	2.41	55	3.4
mmu-miR-3473e	mmu-mir-3473e	7.67	0.45	2.33	0.2	9.33	0.49	7	0.43
mmu-miR-3473f	mmu-mir-3473f	4.5	0.26	6	0.53	7	0.37	6.5	0.4
mmu-miR-3473g	mmu-mir-3473g	22	1.29	18	1.58	18	0.94	22	1.36
mmu-miR-3473h-5p	mmu-mir-3473h	246	14.41	168	14.72	243	12.73	222	13.71
mmu-miR-3474	mmu-mir-3474	49	2.87	38	3.33	60	3.14	60	3.7
mmu-miR-3475-5p	mmu-mir-3475	0	0	0	0	0	0	0	0
mmu-miR-3475-3p	mmu-mir-3475	0	0	0	0	0	0	0	0
mmu-miR-34a-5p	mmu-mir-34a	2782	162.94	1584	138.81	2776	145.43	2079	128.38
mmu-miR-34a-3p	mmu-mir-34a	11	0.64	5	0.44	10	0.52	8	0.49
mmu-miR-34b-5p	mmu-mir-34b	149.5	8.76	99.5	8.72	38.5	2.02	126.5	7.81
mmu-miR-34b-3p	mmu-mir-34b	180	10.54	141	12.36	29	1.52	141	8.71
mmu-miR-34c-5p	mmu-mir-34c	3300.5	193.31	2054.5	180.05	657.5	34.45	2377.5	146.81
mmu-miR-34c-3p	mmu-mir-34c	51	2.99	47	4.12	4	0.21	62	3.83
mmu-miR-350-5p	mmu-mir-350	767	44.92	676	59.24	915	47.94	757	46.74
mmu-miR-350-3p	mmu-mir-350	3765	220.52	1962	171.94	2341	122.64	2505	154.68
mmu-miR-351-5p	mmu-mir-351	11940	699.33	11209	982.3	17508	917.24	11514	710.98
mmu-miR-351-3p	mmu-mir-351	75	4.39	57	5	92	4.82	86	5.31
mmu-miR-3535	mmu-mir-3535	701	41.06	594	52.06	685	35.89	663	40.94
mmu-miR-3544-5p	mmu-mir-3544	0	0	0	0	0	0	0	0
mmu-miR-3544-3p	mmu-mir-3544	0	0	0	0	0	0	0	0
mmu-miR-3547-5p	mmu-mir-3547	0	0	0	0	0	0	0	0
mmu-miR-3547-3p	mmu-mir-3547	0	0	0	0	0	0	0	0
mmu-miR-3552	mmu-mir-3552	0	0	0	0	0	0	0	0
mmu-miR-3569-5p	mmu-mir-3569	0	0	0	0	1	0.05	2	0.12
mmu-miR-3569-3p	mmu-mir-3569	8	0.47	2	0.18	4	0.21	2	0.12
mmu-miR-3572-5p	mmu-mir-3572	0	0	1	0.09	2	0.1	0	0
mmu-miR-3572-3p	mmu-mir-3572	4	0.23	1	0.09	5	0.26	4	0.25
mmu-miR-361-5p	mmu-mir-361	1932	113.16	1553	136.1	2239	117.3	1676	103.49
mmu-miR-361-3p	mmu-mir-361	10020	586.88	6762	592.59	11469	600.86	9400	580.44
mmu-miR-3618-5p	mmu-mir-3618	0	0	1	0.09	0	0	2	0.12
mmu-miR-3618-3p	mmu-mir-3618	0	0	0	0	0	0	0	0
mmu-miR-362-5p	mmu-mir-362	4172	244.36	2984	261.5	4122	215.95	2741	169.25
mmu-miR-362-3p	mmu-mir-362	1392	81.53	774	67.83	2035	106.61	990	61.13
mmu-miR-3620-5p	mmu-mir-3620	0	0	0	0	0	0	0	0
mmu-miR-3620-3p	mmu-mir-3620	0	0	0	0	0	0	0	0
mmu-miR-363-5p	mmu-mir-363	4	0.23	1	0.09	7	0.37	1	0.06
mmu-miR-363-3p	mmu-mir-363	8	0.47	8	0.7	10	0.52	18	1.11
mmu-miR-365-1-5p	mmu-mir-365-1	0	0	2	0.18	0	0	0	0
mmu-miR-365-3p	mmu-mir-365-1	282	16.52	259.5	22.74	271.5	14.22	259	15.99
mmu-miR-365-3p	mmu-mir-365-2	282	16.52	259.5	22.74	270.5	14.17	261	16.12
mmu-miR-365-2-5p	mmu-mir-365-2	23	1.35	26	2.28	25	1.31	21	1.3
mmu-miR-367-5p	mmu-mir-367	0	0	0	0	0	0	0	0
mmu-miR-367-3p	mmu-mir-367	0	0	0	0	0	0	0	0
mmu-miR-369-5p	mmu-mir-369	0	0	0	0	0	0	0	0
mmu-miR-369-3p	mmu-mir-369	0	0	0	0	0	0	0	0
mmu-miR-370-5p	mmu-mir-370	0	0	0	0	0	0	0	0
mmu-miR-370-3p	mmu-mir-370	0	0	0	0	0	0	0	0
mmu-miR-374b-5p	mmu-mir-374b	9400.5	550.59	5307	465.08	12200	639.16	7851.5	484.82
mmu-miR-374b-3p	mmu-mir-374b	0	0	0	0	0	0	0	0
mmu-miR-374c-5p	mmu-mir-374c	2.5	0.15	2	0.18	9	0.47	1.5	0.09
mmu-miR-374c-3p	mmu-mir-374c	0	0	0.5	0.04	2	0.1	0	0
mmu-miR-375-5p	mmu-mir-375	0	0	0	0	0	0	0	0
mmu-miR-375-3p	mmu-mir-375	1	0.06	0	0	6	0.31	5	0.31
mmu-miR-376a-5p	mmu-mir-376a	0	0	0	0	0	0	0	0
mmu-miR-376a-3p	mmu-mir-376a	0	0	0	0	0	0	0	0
mmu-miR-376b-5p	mmu-mir-376b	0	0	0	0	0	0	0	0
mmu-miR-376b-3p	mmu-mir-376b	0	0	0	0	0	0	0	0
mmu-miR-376c-5p	mmu-mir-376c	0	0	0	0	0	0	0	0
mmu-miR-376c-3p	mmu-mir-376c	0	0	0	0	0	0	0	0
mmu-miR-377-5p	mmu-mir-377	0	0	0	0	0	0	0	0
mmu-miR-377-3p	mmu-mir-377	0	0	0	0	0	0	0	0
mmu-miR-378a-5p	mmu-mir-378a	313	18.33	222	19.46	437	22.89	300	18.52
mmu-miR-378a-3p	mmu-mir-378a	83779.3	4907	59238.2	5191.35	102541	5372.12	75103.8	4637.59
mmu-miR-378b	mmu-mir-378b	63.5	3.72	54.83	4.81	125.5	6.57	82.17	5.07
mmu-miR-378c	mmu-mir-378c	4748.33	278.11	3180.67	278.74	6937	363.43	4846.83	299.29
mmu-miR-378d	mmu-mir-378d	3160.17	185.09	2378.17	208.41	4659.83	244.13	3686.67	227.65
mmu-miR-379-5p	mmu-mir-379	0	0	0	0	0	0	2	0.12
mmu-miR-379-3p	mmu-mir-379	0	0	0	0	0	0	0	0
mmu-miR-380-5p	mmu-mir-380	0	0	0	0	0	0	0	0
mmu-miR-380-3p	mmu-mir-380	0	0	0	0	0	0	0	0
mmu-miR-381-5p	mmu-mir-381	0	0	0	0	0	0	0	0
mmu-miR-381-3p	mmu-mir-381	0	0	1	0.09	0	0	0	0
mmu-miR-382-5p	mmu-mir-382	0	0	0	0	0	0	0	0
mmu-miR-382-3p	mmu-mir-382	0	0	0	0	0	0	0	0
mmu-miR-383-5p	mmu-mir-383	0	0	0	0	0	0	0	0
mmu-miR-383-3p	mmu-mir-383	0	0	0	0	0	0	0	0
mmu-miR-384-5p	mmu-mir-384	0	0	0	0	0	0	0	0
mmu-miR-384-3p	mmu-mir-384	0	0	0	0	0	0	0	0
mmu-miR-3960	mmu-mir-3960	0	0	0	0	2	0.1	0	0
mmu-miR-3961	mmu-mir-3961	0	0	0	0	0	0	0	0
mmu-miR-3962	mmu-mir-3962	0	0	0	0	0	0	0	0
mmu-miR-3963	mmu-mir-3963	324	18.98	432	37.86	1283	67.22	675	41.68
mmu-miR-3964	mmu-mir-3964	1	0.06	1	0.09	2.5	0.13	0.5	0.03
mmu-miR-3965	mmu-mir-3965	0	0	0	0	0	0	0	0
mmu-miR-3966	mmu-mir-3966	0	0	0	0	0	0	0	0
mmu-miR-3967	mmu-mir-3967	0	0	0	0	0	0	0	0
mmu-miR-3968	mmu-mir-3968	3921	229.65	4352	381.39	8978	470.36	5951	367.47
mmu-miR-3969	mmu-mir-3969	0	0	0	0	1	0.05	0.5	0.03
mmu-miR-3970	mmu-mir-3970	0	0	0	0	0	0	0	0
mmu-miR-3971	mmu-mir-3971	0	0	0	0	0	0	0	0
mmu-miR-409-5p	mmu-mir-409	0	0	0	0	0	0	0	0
mmu-miR-409-3p	mmu-mir-409	0	0	1	0.09	0	0	0	0
mmu-miR-410-5p	mmu-mir-410	0	0	0	0	0	0	0	0
mmu-miR-410-3p	mmu-mir-410	0	0	0	0	0	0	0	0
mmu-miR-411-5p	mmu-mir-411	0	0	0	0	0	0	0	0
mmu-miR-411-3p	mmu-mir-411	1	0.06	0	0	0	0	0	0
mmu-miR-412-5p	mmu-mir-412	0	0	0	0	0	0	0	0
mmu-miR-412-3p	mmu-mir-412	0	0	0	0	0	0	0	0
mmu-miR-421-5p	mmu-mir-421	2	0.12	0	0	2	0.1	1	0.06
mmu-miR-421-3p	mmu-mir-421	1011	59.21	674	59.07	1294	67.79	801	49.46
mmu-miR-423-5p	mmu-mir-423	12226	716.08	9833	861.72	17456	914.52	11458	707.52
mmu-miR-423-3p	mmu-mir-423	28081	1644.72	21365	1872.33	34714	1818.66	24008	1482.47
mmu-miR-425-5p	mmu-mir-425	4239	248.28	2697	236.35	3378	176.97	3535	218.28
mmu-miR-425-3p	mmu-mir-425	306	17.92	208	18.23	276	14.46	254	15.68
mmu-miR-429-5p	mmu-mir-429	0	0	0	0	0	0	0	0
mmu-miR-429-3p	mmu-mir-429	352	20.62	331	29.01	254	13.31	329.5	20.35
mmu-miR-431-5p	mmu-mir-431	0	0	0	0	0	0	0	0
mmu-miR-431-3p	mmu-mir-431	0	0	0	0	0	0	0	0
mmu-miR-432	mmu-mir-432	0	0	0	0	0	0	0	0
mmu-miR-433-5p	mmu-mir-433	0	0	0	0	0	0	0	0
mmu-miR-433-3p	mmu-mir-433	0	0	0	0	0	0	0	0
mmu-miR-434-5p	mmu-mir-434	0	0	0	0	0	0	0	0
mmu-miR-434-3p	mmu-mir-434	0	0	0	0	0	0	0	0
mmu-miR-448-5p	mmu-mir-448	0	0	0	0	0	0	0	0
mmu-miR-448-3p	mmu-mir-448	0	0	0	0	0	0	0	0
mmu-miR-449a-5p	mmu-mir-449a	17	1	20	1.75	17	0.89	11	0.68
mmu-miR-449a-3p	mmu-mir-449a	6	0.35	0	0	0	0	0	0
mmu-miR-449b	mmu-mir-449b	0	0	0	0	0	0	0	0
mmu-miR-449c-5p	mmu-mir-449c	1	0.06	1	0.09	0	0	2	0.12
mmu-miR-449c-3p	mmu-mir-449c	0	0	0	0	0	0	0	0
mmu-miR-450a-5p	mmu-mir-450a-1	415.5	24.34	256.5	22.48	579	30.33	398.5	24.61
mmu-miR-450a-1-3p	mmu-mir-450a-1	27	1.58	22.5	1.97	24	1.26	15	0.93
mmu-miR-450a-5p	mmu-mir-450a-2	416.5	24.39	256.5	22.48	578	30.28	398.5	24.61
mmu-miR-450a-2-3p	mmu-mir-450a-2	1	0.06	1	0.09	1	0.05	1	0.06
mmu-miR-450b-5p	mmu-mir-450b	589	34.5	352	30.85	528	27.66	474	29.27
mmu-miR-450b-3p	mmu-mir-450b	214	12.53	124.5	10.91	244	12.78	122	7.53
mmu-miR-451a	mmu-mir-451a	319	18.68	342	29.97	78	4.09	130	8.03
mmu-miR-451b	mmu-mir-451b	0	0	0	0	0	0	0	0
mmu-miR-452-5p	mmu-mir-452	0	0	0	0	0	0	0	0
mmu-miR-452-3p	mmu-mir-452	0	0	0	0	0	0	0	0
mmu-miR-453	mmu-mir-453	0	0	0	0	0	0	0	0
mmu-miR-455-5p	mmu-mir-455	15	0.88	15	1.31	35	1.83	17	1.05
mmu-miR-455-3p	mmu-mir-455	1	0.06	3	0.26	8	0.42	0	0
mmu-miR-463-5p	mmu-mir-463	0	0	0	0	0	0	0	0
mmu-miR-463-3p	mmu-mir-463	0	0	0	0	0	0	0	0
mmu-miR-465a-5p	mmu-mir-465a	0	0	0	0	0	0	0	0
mmu-miR-465a-3p	mmu-mir-465a	0	0	0	0	0	0	0	0
mmu-miR-465b-5p	mmu-mir-465b-1	2	0.12	0	0	0.5	0.03	0	0
mmu-miR-465b-3p	mmu-mir-465b-1	0	0	0	0	0	0	0	0
mmu-miR-465b-5p	mmu-mir-465b-2	2	0.12	0	0	0.5	0.03	0	0
mmu-miR-465b-3p	mmu-mir-465b-2	0	0	0	0	0	0	0	0
mmu-miR-465c-5p	mmu-mir-465c-1	0.5	0.03	0	0	0	0	0	0
mmu-miR-465c-3p	mmu-mir-465c-1	0	0	0	0	0	0	0	0
mmu-miR-465c-5p	mmu-mir-465c-2	0.5	0.03	0	0	0	0	0	0
mmu-miR-465c-3p	mmu-mir-465c-2	0	0	0	0	0	0	0	0
mmu-miR-465d-5p	mmu-mir-465d	0	0	0	0	0	0	0	0
mmu-miR-465d-3p	mmu-mir-465d	0	0	0	0	0	0	0	0
mmu-miR-466a-5p	mmu-mir-466a	0	0	0	0	0.5	0.03	0	0
mmu-miR-466a-3p	mmu-mir-466a	7.43	0.44	4.89	0.43	5.43	0.28	8.22	0.51
mmu-miR-466b-5p	mmu-mir-466b-1	2.28	0.13	1.35	0.12	1.54	0.08	2.07	0.13
mmu-miR-466b-3p	mmu-mir-466b-1	4.16	0.24	3.46	0.3	2.09	0.11	4.95	0.31
mmu-miR-466b-5p	mmu-mir-466b-2	1.7	0.1	1.23	0.11	1.29	0.07	1.48	0.09
mmu-miR-466b-3p	mmu-mir-466b-2	4.16	0.24	3.46	0.3	2.09	0.11	4.95	0.31
mmu-miR-466b-5p	mmu-mir-466b-3	2.28	0.13	1.35	0.12	1.54	0.08	2.07	0.13
mmu-miR-466b-3p	mmu-mir-466b-3	4.16	0.24	3.46	0.3	2.09	0.11	4.95	0.31
mmu-miR-466b-5p	mmu-mir-466b-4	2.28	0.13	1.35	0.12	1.54	0.08	2.07	0.13
mmu-miR-466b-3p	mmu-mir-466b-4	4.16	0.24	3.46	0.3	2.09	0.11	4.95	0.31
mmu-miR-466b-5p	mmu-mir-466b-5	2.28	0.13	1.35	0.12	1.54	0.08	2.07	0.13
mmu-miR-466b-3p	mmu-mir-466b-5	4.16	0.24	3.46	0.3	2.09	0.11	4.95	0.31
mmu-miR-466b-5p	mmu-mir-466b-6	2.28	0.13	1.35	0.12	1.54	0.08	2.07	0.13
mmu-miR-466b-3p	mmu-mir-466b-6	4.16	0.24	3.46	0.3	2.09	0.11	4.95	0.31
mmu-miR-466b-5p	mmu-mir-466b-7	2.28	0.13	1.35	0.12	1.54	0.08	2.07	0.13
mmu-miR-466b-3p	mmu-mir-466b-7	4.16	0.24	3.46	0.3	2.09	0.11	4.95	0.31
mmu-miR-466b-5p	mmu-mir-466b-8	0.8	0.05	1.1	0.1	0.8	0.04	1	0.06
mmu-miR-466b-3p	mmu-mir-466b-8	4.16	0.24	3.46	0.3	2.09	0.11	4.95	0.31
mmu-miR-466c-5p	mmu-mir-466c-1	4	0.23	5	0.44	4.33	0.23	6.33	0.39
mmu-miR-466c-3p	mmu-mir-466c-1	4.16	0.24	3.46	0.3	2.09	0.11	4.95	0.31
mmu-miR-466c-5p	mmu-mir-466c-2	4	0.23	5	0.44	4.33	0.23	6.33	0.39
mmu-miR-466c-3p	mmu-mir-466c-2	4.16	0.24	3.46	0.3	2.09	0.11	4.95	0.31
mmu-miR-466c-5p	mmu-mir-466c-3	4	0.23	5	0.44	4.33	0.23	6.33	0.39
mmu-miR-466c-3p	mmu-mir-466c-3	4.16	0.24	3.46	0.3	2.09	0.11	4.95	0.31
mmu-miR-466d-5p	mmu-mir-466d	0.5	0.03	1	0.09	1	0.05	0	0
mmu-miR-466d-3p	mmu-mir-466d	24.19	1.42	23.62	2.07	31.5	1.65	33.97	2.1
mmu-miR-466e-5p	mmu-mir-466e	0	0	0.2	0.02	0.1	0.01	0.1	0.01
mmu-miR-466e-3p	mmu-mir-466e	8.05	0.47	5.83	0.51	5.75	0.3	8.99	0.55
mmu-miR-466f-5p	mmu-mir-466f-1	0.75	0.04	0.25	0.02	0.25	0.01	0.25	0.02
mmu-miR-466f-3p	mmu-mir-466f-1	1.67	0.1	2.67	0.23	1.92	0.1	7.25	0.45
mmu-miR-466f	mmu-mir-466f-1	0.84	0.05	0.25	0.02	0.25	0.01	0.25	0.02
mmu-miR-466f-5p	mmu-mir-466f-2	0.75	0.04	0.25	0.02	0.25	0.01	0.25	0.02
mmu-miR-466f-3p	mmu-mir-466f-2	40.5	2.37	56	4.91	44.75	2.34	52.83	3.26
mmu-miR-466f	mmu-mir-466f-2	0.84	0.05	0.25	0.02	0.25	0.01	0.25	0.02
mmu-miR-466f-5p	mmu-mir-466f-3	0.75	0.04	0.25	0.02	0.25	0.01	0.25	0.02
mmu-miR-466f-3p	mmu-mir-466f-3	32.5	1.9	24.5	2.15	22.25	1.17	21.83	1.35
mmu-miR-466f	mmu-mir-466f-3	0.84	0.05	0.25	0.02	0.25	0.01	0.25	0.02
mmu-miR-466f-5p	mmu-mir-466f-4	0.75	0.04	0.25	0.02	0.25	0.01	0.25	0.02
mmu-miR-466f	mmu-mir-466f-4	0.75	0.04	0.25	0.02	0.25	0.01	0.25	0.02
mmu-miR-466g	mmu-mir-466g	24	1.41	25	2.19	30	1.57	21	1.3
mmu-miR-466h-5p	mmu-mir-466h	12.09	0.71	11.09	0.97	9	0.47	10.27	0.63
mmu-miR-466h-3p	mmu-mir-466h	18.5	1.08	14.5	1.27	10	0.52	13	0.8
mmu-miR-466i-5p	mmu-mir-466i	7.69	0.45	4.65	0.41	20.38	1.07	12.02	0.74
mmu-miR-466i-5p	mmu-mir-466i	13.35	0.78	9.32	0.82	28.29	1.48	18.47	1.14
mmu-miR-466i-3p	mmu-mir-466i	8.5	0.5	9	0.79	10.75	0.56	13	0.8
mmu-miR-466j	mmu-mir-466j	0.09	0.01	0	0	0	0	0	0
mmu-miR-466k	mmu-mir-466k	0.63	0.04	0	0	0	0	1.32	0.08
mmu-miR-466l-5p	mmu-mir-466l	0	0	0	0	1	0.05	0	0
mmu-miR-466l-3p	mmu-mir-466l	2	0.12	0	0	3	0.16	0	0
mmu-miR-466m-5p	mmu-mir-466m	0.38	0.02	0.19	0.02	0	0	0.27	0.02
mmu-miR-466m-3p	mmu-mir-466m	2	0.12	3	0.26	4	0.21	2	0.12
mmu-miR-466n-5p	mmu-mir-466n	0.5	0.03	1	0.09	1	0.05	0	0
mmu-miR-466n-3p	mmu-mir-466n	2	0.12	1	0.09	5	0.26	6	0.37
mmu-miR-466o-5p	mmu-mir-466o	2.28	0.13	1.35	0.12	1.54	0.08	2.07	0.13
mmu-miR-466o-3p	mmu-mir-466o	0	0	0	0	0	0	0	0
mmu-miR-466p-5p	mmu-mir-466p	1.11	0.06	0.12	0.01	0.86	0.05	0.7	0.04
mmu-miR-466p-3p	mmu-mir-466p	4.16	0.24	3.46	0.3	2.09	0.11	4.95	0.31
mmu-miR-466q	mmu-mir-466q	0	0	0	0	0	0	0	0
mmu-miR-467a-5p	mmu-mir-467a-1	64	3.75	40.55	3.55	62.03	3.25	78.68	4.86
mmu-miR-467a-3p	mmu-mir-467a-1	19.96	1.17	13.6	1.19	16.7	0.87	23.09	1.43
mmu-miR-467a-5p	mmu-mir-467a-10	64	3.75	40.55	3.55	62.03	3.25	78.68	4.86
mmu-miR-467a-3p	mmu-mir-467a-10	19.96	1.17	13.6	1.19	16.7	0.87	23.09	1.43
mmu-miR-467a-5p	mmu-mir-467a-2	64	3.75	40.55	3.55	62.03	3.25	78.68	4.86
mmu-miR-467a-3p	mmu-mir-467a-2	19.96	1.17	13.6	1.19	16.7	0.87	23.09	1.43
mmu-miR-467a-5p	mmu-mir-467a-3	64	3.75	40.55	3.55	62.03	3.25	78.68	4.86
mmu-miR-467a-3p	mmu-mir-467a-3	19.96	1.17	13.6	1.19	16.7	0.87	23.09	1.43
mmu-miR-467a-5p	mmu-mir-467a-4	64	3.75	40.55	3.55	62.03	3.25	78.68	4.86
mmu-miR-467a-3p	mmu-mir-467a-4	19.96	1.17	13.6	1.19	16.7	0.87	23.09	1.43
mmu-miR-467a-5p	mmu-mir-467a-5	64	3.75	40.55	3.55	62.03	3.25	78.68	4.86
mmu-miR-467a-3p	mmu-mir-467a-5	19.96	1.17	13.6	1.19	16.7	0.87	23.09	1.43
mmu-miR-467a-5p	mmu-mir-467a-6	64	3.75	40.55	3.55	62.03	3.25	78.68	4.86
mmu-miR-467a-3p	mmu-mir-467a-6	19.96	1.17	13.6	1.19	16.7	0.87	23.09	1.43
mmu-miR-467a-5p	mmu-mir-467a-7	64	3.75	40.55	3.55	62.03	3.25	78.68	4.86
mmu-miR-467a-3p	mmu-mir-467a-7	19.96	1.17	13.6	1.19	16.7	0.87	23.09	1.43
mmu-miR-467a-5p	mmu-mir-467a-8	64	3.75	40.55	3.55	62.03	3.25	78.68	4.86
mmu-miR-467a-3p	mmu-mir-467a-8	19.96	1.17	13.6	1.19	16.7	0.87	23.09	1.43
mmu-miR-467a-5p	mmu-mir-467a-9	64	3.75	40.55	3.55	62.03	3.25	78.68	4.86
mmu-miR-467a-3p	mmu-mir-467a-9	19.96	1.17	13.6	1.19	16.7	0.87	23.09	1.43
mmu-miR-467b-5p	mmu-mir-467b	74.91	4.39	47.73	4.18	70.94	3.72	90.76	5.6
mmu-miR-467b-3p	mmu-mir-467b	1.08	0.06	0	0	1	0.05	0	0
mmu-miR-467c-5p	mmu-mir-467c	102.33	5.99	88.83	7.78	95.4	5	95.15	5.88
mmu-miR-467c-3p	mmu-mir-467c	0.58	0.03	0.15	0.01	0.08	0	0.58	0.04
mmu-miR-467d-5p	mmu-mir-467d	22.16	1.3	10.08	0.88	15.73	0.82	23.4	1.45
mmu-miR-467d-3p	mmu-mir-467d	19.05	1.12	12.93	1.13	16.61	0.87	22.36	1.38
mmu-miR-467e-5p	mmu-mir-467e	61.5	3.6	50	4.38	77	4.03	55.5	3.43
mmu-miR-467e-3p	mmu-mir-467e	0.74	0.04	0.57	0.05	0.24	0.01	1.42	0.09
mmu-miR-467f	mmu-mir-467f	0.08	0	1	0.09	0	0	1	0.06
mmu-miR-467g	mmu-mir-467g	0	0	0	0	0.5	0.03	0.2	0.01
mmu-miR-467h	mmu-mir-467h	0	0	0	0	0.5	0.03	0.5	0.03
mmu-miR-468-5p	mmu-mir-468	0	0	0	0	0	0	0	0
mmu-miR-468-3p	mmu-mir-468	0	0	0	0	0	0	0	0
mmu-miR-470-5p	mmu-mir-470	0	0	0	0	0	0	0	0
mmu-miR-470-3p	mmu-mir-470	0	0	0	0	0	0	0	0
mmu-miR-471-5p	mmu-mir-471	0	0	0	0	0	0	0	0
mmu-miR-471-3p	mmu-mir-471	0	0	0	0	0	0	0	0
mmu-miR-483-5p	mmu-mir-483	0	0	0	0	0	0	0	0
mmu-miR-483-3p	mmu-mir-483	0	0	0	0	0	0	0	0
mmu-miR-484	mmu-mir-484	17270	1011.51	13975	1224.7	21505	1126.65	14961	923.83
mmu-miR-485-5p	mmu-mir-485	0	0	0	0	0	0	0	0
mmu-miR-485-3p	mmu-mir-485	0	0	0	0	0	0	0	0
mmu-miR-486a-5p	mmu-mir-486a	1265	74.09	724.5	63.49	617	32.32	569.5	35.17
mmu-miR-486a-3p	mmu-mir-486a	68	3.98	10	0.88	59.5	3.12	55.5	3.43
mmu-miR-486b-5p	mmu-mir-486b	1307	76.55	736.5	64.54	646	33.84	598.5	36.96
mmu-miR-486b-3p	mmu-mir-486b	4	0.23	0	0	3.5	0.18	3.5	0.22
mmu-miR-487b-5p	mmu-mir-487b	0	0	0	0	0	0	0	0
mmu-miR-487b-3p	mmu-mir-487b	0	0	0	0	0	0	0	0
mmu-miR-488-5p	mmu-mir-488	0	0	0	0	0	0	0	0
mmu-miR-488-3p	mmu-mir-488	0	0	0	0	0	0	0	0
mmu-miR-489-5p	mmu-mir-489	0	0	0	0	0	0	0	0
mmu-miR-489-3p	mmu-mir-489	0	0	0	0	0	0	0	0
mmu-miR-490-5p	mmu-mir-490	0	0	0	0	0	0	0	0
mmu-miR-490-3p	mmu-mir-490	0	0	0	0	0	0	0	0
mmu-miR-491-5p	mmu-mir-491	32	1.87	24	2.1	25	1.31	34	2.1
mmu-miR-491-3p	mmu-mir-491	5	0.29	4	0.35	2	0.1	10	0.62
mmu-miR-493-5p	mmu-mir-493	1	0.06	0	0	0	0	0	0
mmu-miR-493-3p	mmu-mir-493	0	0	0	0	0	0	0	0
mmu-miR-494-5p	mmu-mir-494	0	0	0	0	0	0	0	0
mmu-miR-494-3p	mmu-mir-494	1	0.06	0	0	0	0	1	0.06
mmu-miR-495-5p	mmu-mir-495	0	0	0	0	0	0	0	0
mmu-miR-495-3p	mmu-mir-495	0	0	0	0	0	0	0	0
mmu-miR-496a-5p	mmu-mir-496a	0	0	0	0	0	0	0	0
mmu-miR-496a-3p	mmu-mir-496a	0	0	0	0	0	0	0	0
mmu-miR-496b	mmu-mir-496b	0	0	0	0	0	0	0	0
mmu-miR-497a-5p	mmu-mir-497a	12	0.7	11	0.96	19	1	8	0.49
mmu-miR-497a-3p	mmu-mir-497a	0	0	0	0	0	0	0	0
mmu-miR-497b	mmu-mir-497b	24	1.41	18	1.58	19	1	26	1.61
mmu-miR-499-5p	mmu-mir-499	8	0.47	1	0.09	1	0.05	0	0
mmu-miR-499-3p	mmu-mir-499	0	0	0	0	0	0	0	0
mmu-miR-500-5p	mmu-mir-500	21	1.23	12	1.05	21	1.1	17	1.05
mmu-miR-500-3p	mmu-mir-500	153	8.96	93	8.15	176	9.22	137.5	8.49
mmu-miR-501-5p	mmu-mir-501	251	14.7	161	14.11	181	9.48	197	12.16
mmu-miR-501-3p	mmu-mir-501	25581	1498.29	23178	2031.21	32466	1700.89	25957.5	1602.85
mmu-miR-503-5p	mmu-mir-503	1510	88.44	1027	90	1998	104.68	1425	87.99
mmu-miR-503-3p	mmu-mir-503	185	10.84	144	12.62	243	12.73	159	9.82
mmu-miR-504-5p	mmu-mir-504	1354	79.3	1080	94.65	736	38.56	1390	85.83
mmu-miR-504-3p	mmu-mir-504	3	0.18	13	1.14	1	0.05	7	0.43
mmu-miR-5046	mmu-mir-5046	0	0	0	0	0	0	0	0
mmu-miR-505-5p	mmu-mir-505	66	3.87	89	7.8	58	3.04	53	3.27
mmu-miR-505-3p	mmu-mir-505	196	11.48	106	9.29	203	10.64	149	9.2
mmu-miR-509-5p	mmu-mir-509	0	0	0	0	0	0	0	0
mmu-miR-509-3p	mmu-mir-509	0	0	0	0	0	0	0	0
mmu-miR-5098	mmu-mir-5098	0	0	0	0	0	0	0	0
mmu-miR-5099	mmu-mir-5099	3980	233.11	3135	274.74	5376	281.65	4972	307.02
mmu-miR-5100	mmu-mir-5100	19	1.11	26	2.28	39	2.04	34	2.1
mmu-miR-5101	mmu-mir-5101	0	0	0	0	1	0.05	0	0
mmu-miR-5103	mmu-mir-5103	16	0.94	11	0.96	2	0.1	8	0.49
mmu-miR-5104	mmu-mir-5104	80	4.69	48	4.21	51	2.67	64	3.95
mmu-miR-5104b-5p	mmu-mir-5104b	0	0	0	0	0	0	2	0.12
mmu-miR-5106	mmu-mir-5106	1	0.06	0	0	0	0	0	0
mmu-miR-5107-5p	mmu-mir-5107	1	0.06	1	0.09	8	0.42	2	0.12
mmu-miR-5107-3p	mmu-mir-5107	2	0.12	3	0.26	14	0.73	13	0.8
mmu-miR-5108	mmu-mir-5108	0	0	0	0	0	0	0	0
mmu-miR-511-5p	mmu-mir-511	37	2.17	18	1.58	53	2.78	19	1.17
mmu-miR-511-3p	mmu-mir-511	1311	76.79	749	65.64	1543	80.84	1075	66.38
mmu-miR-5110	mmu-mir-5110	0	0	0	0	0	0	0	0
mmu-miR-5112	mmu-mir-5112	0	0	0	0	0	0	0	0
mmu-miR-5113	mmu-mir-5113	2	0.12	2	0.18	4	0.21	4	0.25
mmu-miR-5114	mmu-mir-5114	31	1.82	13	1.14	43	2.25	46	2.84
mmu-miR-5116	mmu-mir-5116	2	0.12	0	0	2	0.1	2	0.12
mmu-miR-5118	mmu-mir-5118	0	0	0	0	0	0	0	0
mmu-miR-5119	mmu-mir-5119	0	0	0	0	1	0.05	1	0.06
mmu-miR-5120	mmu-mir-5120	0	0	0	0	0	0	0	0
mmu-miR-5121	mmu-mir-5121	25	1.46	21	1.84	28	1.47	19	1.17
mmu-miR-5122	mmu-mir-5122	0	0	0	0	3	0.16	3	0.19
mmu-miR-5123	mmu-mir-5123	5.5	0.32	8	0.7	7	0.37	6	0.37
mmu-miR-5123	mmu-mir-5123	5.5	0.32	8	0.7	7	0.37	6	0.37
mmu-miR-5124a	mmu-mir-5124a	0	0	0	0	0	0	0	0
mmu-miR-5124b	mmu-mir-5124b	0	0	0	0	0	0	0	0
mmu-miR-5125	mmu-mir-5125	0	0	0	0	0	0	0	0
mmu-miR-5126	mmu-mir-5126	1	0.06	0	0	0	0	0	0
mmu-miR-5127	mmu-mir-5127	0	0	0	0	0	0	0	0
mmu-miR-5128	mmu-mir-5128	28.75	1.68	21	1.84	31.5	1.65	25.58	1.58
mmu-miR-5129-5p	mmu-mir-5129	22	1.29	36	3.15	97	5.08	20	1.23
mmu-miR-5129-3p	mmu-mir-5129	223	13.06	178	15.6	395	20.69	253	15.62
mmu-miR-5130	mmu-mir-5130	2	0.12	5	0.44	11	0.58	2	0.12
mmu-miR-5131	mmu-mir-5131	0	0	0	0	0	0	0	0
mmu-miR-5132-5p	mmu-mir-5132	42	2.46	31	2.72	40	2.1	43	2.66
mmu-miR-5132-3p	mmu-mir-5132	2	0.12	2	0.18	4	0.21	3	0.19
mmu-miR-5133	mmu-mir-5133	0	0	0	0	0	0	0	0
mmu-miR-5134-5p	mmu-mir-5134	12	0.7	15	1.31	11	0.58	8	0.49
mmu-miR-5134-3p	mmu-mir-5134	20	1.17	18	1.58	14	0.73	12	0.74
mmu-miR-5135	mmu-mir-5135	0	0	0	0	0	0	0	0
mmu-miR-5136	mmu-mir-5136	0	0	0	0	0	0	0	0
mmu-miR-532-5p	mmu-mir-532	70054	4103.1	46615	4085.11	96884	5075.75	71118	4391.47
mmu-miR-532-3p	mmu-mir-532	1629	95.41	1159	101.57	1916	100.38	1593	98.37
mmu-miR-539-5p	mmu-mir-539	0	0	0	0	0	0	0	0
mmu-miR-539-3p	mmu-mir-539	0	0	0	0	0	0	0	0
mmu-miR-540-5p	mmu-mir-540	0	0	0	0	0	0	0	0
mmu-miR-540-3p	mmu-mir-540	0	0	0	0	0	0	0	0
mmu-miR-541-5p	mmu-mir-541	0	0	0	0	0	0	0	0
mmu-miR-541-3p	mmu-mir-541	0	0	0	0	0	0	0	0
mmu-miR-542-5p	mmu-mir-542	5	0.29	0	0	8	0.42	2	0.12
mmu-miR-542-3p	mmu-mir-542	1741	101.97	1318	115.5	1998	104.68	1758	108.55
mmu-miR-543-5p	mmu-mir-543	0	0	0	0	0	0	0	0
mmu-miR-543-3p	mmu-mir-543	0	0	0	0	0	0	0	0
mmu-miR-544-5p	mmu-mir-544	0	0	0	0	0	0	0	0
mmu-miR-544-3p	mmu-mir-544	0	0	0	0	0	0	0	0
mmu-miR-546	mmu-mir-546	0	0	0	0	0	0	0	0
mmu-miR-547-5p	mmu-mir-547	0	0	0	0	0	0	0	0
mmu-miR-547-3p	mmu-mir-547	0	0	0	0	0	0	0	0
mmu-miR-551b-5p	mmu-mir-551b	0	0	0	0	0	0	0	0
mmu-miR-551b-3p	mmu-mir-551b	0	0	0	0	0	0	0	0
mmu-miR-5615-5p	mmu-mir-5615-1	7.5	0.44	3	0.26	13	0.68	9.5	0.59
mmu-miR-5615-3p	mmu-mir-5615-1	0	0	0	0	0	0	0	0
mmu-miR-5615-5p	mmu-mir-5615-2	7.5	0.44	3	0.26	13	0.68	9.5	0.59
mmu-miR-5615-3p	mmu-mir-5615-2	0	0	0	0	0	0	0	0
mmu-miR-5616-5p	mmu-mir-5616	2	0.12	0	0	0	0	0	0
mmu-miR-5616-3p	mmu-mir-5616	3	0.18	1	0.09	1	0.05	5	0.31
mmu-miR-5617-5p	mmu-mir-5617	0	0	0	0	4	0.21	2	0.12
mmu-miR-5617-3p	mmu-mir-5617	0	0	0	0	0	0	0	0
mmu-miR-5618-5p	mmu-mir-5618	0	0	0	0	0	0	1	0.06
mmu-miR-5618-3p	mmu-mir-5618	0	0	0	0	0	0	0	0
mmu-miR-5619-5p	mmu-mir-5619	0	0	0	0	0	0	0	0
mmu-miR-5619-3p	mmu-mir-5619	0	0	0	0	0	0	0	0
mmu-miR-5620-5p	mmu-mir-5620	42	2.46	42	3.68	59	3.09	41	2.53
mmu-miR-5620-3p	mmu-mir-5620	6	0.35	2	0.18	1	0.05	4	0.25
mmu-miR-5621-5p	mmu-mir-5621	0	0	0	0	5	0.26	3	0.19
mmu-miR-5621-3p	mmu-mir-5621	9	0.53	6	0.53	17	0.89	11	0.68
mmu-miR-5622-5p	mmu-mir-5622	3	0.18	4	0.35	2	0.1	0	0
mmu-miR-5622-3p	mmu-mir-5622	1	0.06	0	0	1	0.05	0	0
mmu-miR-5623-5p	mmu-mir-5623	0	0	2	0.18	0	0	0	0
mmu-miR-5623-3p	mmu-mir-5623	0	0	0	0	0	0	0	0
mmu-miR-5624-5p	mmu-mir-5624	12	0.7	13	1.14	12	0.63	17	1.05
mmu-miR-5624-3p	mmu-mir-5624	1	0.06	0	0	5	0.26	3	0.19
mmu-miR-5625-5p	mmu-mir-5625	0	0	0	0	0	0	0	0
mmu-miR-5625-3p	mmu-mir-5625	1	0.06	2	0.18	0	0	1	0.06
mmu-miR-5626-5p	mmu-mir-5626	3	0.18	1	0.09	0	0	0	0
mmu-miR-5626-3p	mmu-mir-5626	0	0	1	0.09	2	0.1	0	0
mmu-miR-5627-5p	mmu-mir-5627	1	0.06	1	0.09	3	0.16	2	0.12
mmu-miR-5627-3p	mmu-mir-5627	0	0	0	0	0	0	0	0
mmu-miR-568	mmu-mir-568	0	0	0	0	0	0	0	0
mmu-miR-5709-5p	mmu-mir-5709	0	0	0	0	0	0	0	0
mmu-miR-5709-3p	mmu-mir-5709	0	0	0	0	0	0	0	0
mmu-miR-5710	mmu-mir-5710	0	0	0	0	0	0	0	0
mmu-miR-574-5p	mmu-mir-574	2498.31	146.33	1799.22	157.68	2333.64	122.26	2044.44	126.24
mmu-miR-574-3p	mmu-mir-574	1305	76.43	827.5	72.52	1268	66.43	1272.5	78.58
mmu-miR-582-5p	mmu-mir-582	34	1.99	19	1.67	84	4.4	35	2.16
mmu-miR-582-3p	mmu-mir-582	491	28.76	380	33.3	1425	74.66	450	27.79
mmu-miR-590-5p	mmu-mir-590	0	0	0	0	0	0	0	0
mmu-miR-590-3p	mmu-mir-590	0	0	0	0	0	0	0	0
mmu-miR-592-5p	mmu-mir-592	0	0	1	0.09	0	0	0	0
mmu-miR-592-3p	mmu-mir-592	0	0	0	0	0	0	0	0
mmu-miR-598-5p	mmu-mir-598	0	0	0	0	0	0	0	0
mmu-miR-598-3p	mmu-mir-598	9	0.53	1	0.09	9	0.47	7	0.43
mmu-miR-599	mmu-mir-599	0	0	0	0	0	0	0	0
mmu-miR-615-5p	mmu-mir-615	0	0	0	0	0	0	0	0
mmu-miR-615-3p	mmu-mir-615	2	0.12	1	0.09	5	0.26	3	0.19
mmu-miR-6236	mmu-mir-6236	0	0	0	0	0	0	0	0
mmu-miR-6237	mmu-mir-6237	0	0	0	0	0	0	0	0
mmu-miR-6238	mmu-mir-6238	76	4.45	65	5.7	156	8.17	171	10.56
mmu-miR-6239	mmu-mir-6239	18	1.05	8	0.7	41	2.15	33	2.04
mmu-miR-6240	mmu-mir-6240	12	0.7	14	1.23	10	0.52	11	0.68
mmu-miR-6241	mmu-mir-6241	0	0	0	0	0	0	0	0
mmu-miR-6244	mmu-mir-6244	0	0	0	0	0	0	0	0
mmu-miR-6335	mmu-mir-6335	0	0	0	0	0	0	0	0
mmu-miR-6336	mmu-mir-6336	0	0	0	0	0	0	0	0
mmu-miR-6337	mmu-mir-6337	0	0	0	0	0	0	0	0
mmu-miR-6338	mmu-mir-6338	0	0	0	0	0	0	0	0
mmu-miR-6339	mmu-mir-6339	0	0	0	0	0	0	0	0
mmu-miR-6340	mmu-mir-6340	0	0	0	0	0	0	0	0
mmu-miR-6341	mmu-mir-6341	0	0	0	0	0	0	0	0
mmu-miR-6342	mmu-mir-6342	0	0	0	0	0	0	0	0
mmu-miR-6343	mmu-mir-6343	0	0	0	0	0	0	0	0
mmu-miR-6344	mmu-mir-6344	0	0	0	0	0	0	0	0
mmu-miR-6345	mmu-mir-6345	0	0	0	0	0	0	0	0
mmu-miR-6346	mmu-mir-6346	0	0	0	0	0	0	0	0
mmu-miR-6347	mmu-mir-6347	0	0	0	0	0	0	0	0
mmu-miR-6348	mmu-mir-6348	0	0	0	0	0	0	0	0
mmu-miR-6349	mmu-mir-6349	0	0	0	0	0	0	0	0
mmu-miR-6350	mmu-mir-6350	0	0	0	0	0	0	0	0
mmu-miR-6351	mmu-mir-6351	0	0	0	0	0	0	0	0
mmu-miR-6352	mmu-mir-6352	0	0	0	0	0	0	0	0
mmu-miR-6353	mmu-mir-6353	0	0	0	0	0	0	0	0
mmu-miR-6354	mmu-mir-6354	0	0	0	0	0	0	0	0
mmu-miR-6355	mmu-mir-6355	0	0	0	0	0	0	0	0
mmu-miR-6356	mmu-mir-6356	0	0	0	0	0	0	0	0
mmu-miR-6357	mmu-mir-6357	0	0	0	0	0	0	0	0
mmu-miR-6358	mmu-mir-6358	0	0	0	0	0	0	0	0
mmu-miR-6359	mmu-mir-6359	0	0	0	0	0	0	0	0
mmu-miR-6360	mmu-mir-6360	0	0	0	0	0	0	0	0
mmu-miR-6361	mmu-mir-6361	0	0	0	0	0	0	0	0
mmu-miR-6362	mmu-mir-6362	0	0	0	0	0	0	0	0
mmu-miR-6363	mmu-mir-6363	0	0	0	0	0	0	0	0
mmu-miR-6364	mmu-mir-6364	0	0	0	0	0	0	0	0
mmu-miR-6365	mmu-mir-6365	0	0	0	0	0	0	0	0
mmu-miR-6366	mmu-mir-6366	0	0	0	0	0	0	0	0
mmu-miR-6367	mmu-mir-6367	0	0	0	0	0	0	0	0
mmu-miR-6368	mmu-mir-6368	0	0	0	0	0	0	0	0
mmu-miR-6369	mmu-mir-6369	0	0	0	0	0	0	0	0
mmu-miR-6370	mmu-mir-6370	0	0	0	0	0	0	0	0
mmu-miR-6371	mmu-mir-6371	0	0	0	0	0	0	0	0
mmu-miR-6372	mmu-mir-6372	0	0	0	0	0	0	0	0
mmu-miR-6373	mmu-mir-6373	0	0	0	0	0	0	0	0
mmu-miR-6374	mmu-mir-6374	0	0	0	0	0	0	0	0
mmu-miR-6375	mmu-mir-6375	0	0	0	0	0	0	0	0
mmu-miR-6376	mmu-mir-6376	0	0	0	0	0	0	0	0
mmu-miR-6377	mmu-mir-6377	0	0	0	0	0	0	0	0
mmu-miR-6378	mmu-mir-6378	0	0	0	0	0	0	0	0
mmu-miR-6379	mmu-mir-6379	0	0	0	0	0	0	0	0
mmu-miR-6380	mmu-mir-6380	0	0	0	0	0	0	0	0
mmu-miR-6381	mmu-mir-6381	0	0	0	0	0	0	0	0
mmu-miR-6382	mmu-mir-6382	0	0	0	0	0	0	0	0
mmu-miR-6383	mmu-mir-6383	0	0	0	0	0	0	0	0
mmu-miR-6384	mmu-mir-6384	0	0	0	0	0	0	0	0
mmu-miR-6385	mmu-mir-6385	0	0	0	0	0	0	0	0
mmu-miR-6386	mmu-mir-6386	0	0	0	0	0	0	0	0
mmu-miR-6387	mmu-mir-6387	0	0	0	0	0	0	0	0
mmu-miR-6388	mmu-mir-6388	0	0	0	0	0	0	0	0
mmu-miR-6389	mmu-mir-6389	0	0	0	0	0	0	0	0
mmu-miR-6390	mmu-mir-6390	0	0	1	0.09	0	0	0	0
mmu-miR-6391	mmu-mir-6391	0	0	0	0	0	0	0	0
mmu-miR-6392-5p	mmu-mir-6392	0	0	0	0	0	0	0	0
mmu-miR-6392-3p	mmu-mir-6392	0	0	0	0	0	0	0	0
mmu-miR-6393	mmu-mir-6393	0	0	0	0	0	0	0	0
mmu-miR-6394	mmu-mir-6394	0	0	0	0	0	0	0	0
mmu-miR-6395	mmu-mir-6395	2.5	0.15	3.5	0.31	6.5	0.34	3	0.19
mmu-miR-6396	mmu-mir-6396	0	0	0	0	0	0	0	0
mmu-miR-6397	mmu-mir-6397	0	0	0	0	0	0	0	0
mmu-miR-6398	mmu-mir-6398	0	0	0	0	0	0	0	0
mmu-miR-6399	mmu-mir-6399	22	1.29	9	0.79	7	0.37	7	0.43
mmu-miR-6400	mmu-mir-6400	0	0	0	0	0	0	0	0
mmu-miR-6401	mmu-mir-6401	0	0	0	0	0	0	0	0
mmu-miR-6402	mmu-mir-6402	0	0	0	0	0	0	0	0
mmu-miR-6403	mmu-mir-6403	0	0	0	0	0	0	0	0
mmu-miR-6404	mmu-mir-6404	0	0	0	0	0	0	0	0
mmu-miR-6405	mmu-mir-6405	0	0	0	0	0	0	0	0
mmu-miR-6406	mmu-mir-6406	0	0	0	0	0	0	1	0.06
mmu-miR-6407	mmu-mir-6407	0	0	0	0	0	0	0	0
mmu-miR-6408	mmu-mir-6408	0	0	0	0	0	0	0	0
mmu-miR-6409	mmu-mir-6409	0	0	0	0	0	0	0	0
mmu-miR-6410	mmu-mir-6410	0	0	0	0	0	0	0	0
mmu-miR-6411	mmu-mir-6411	0	0	0	0	0	0	0	0
mmu-miR-6412	mmu-mir-6412	14	0.82	11	0.96	38	1.99	28	1.73
mmu-miR-6413	mmu-mir-6413	0	0	0	0	0	0	0	0
mmu-miR-6414	mmu-mir-6414	0	0	0	0	0	0	0	0
mmu-miR-6415	mmu-mir-6415	0	0	0	0	0	0	0	0
mmu-miR-6416-5p	mmu-mir-6416	0	0	0	0	0	0	0	0
mmu-miR-6416-3p	mmu-mir-6416	0	0	0	0	0	0	0	0
mmu-miR-6417	mmu-mir-6417	0	0	0	0	0	0	0	0
mmu-miR-6418-5p	mmu-mir-6418	0	0	0	0	0	0	0	0
mmu-miR-6418-3p	mmu-mir-6418	40	2.34	24	2.1	52	2.72	30	1.85
mmu-miR-6419	mmu-mir-6419	0	0	0	0	0	0	0	0
mmu-miR-6420	mmu-mir-6420	0	0	0	0	0	0	0	0
mmu-miR-6481	mmu-mir-6481	0	0	0	0	0	0	0	0
mmu-miR-6516-5p	mmu-mir-6516	39	2.28	26	2.28	60	3.14	40	2.47
mmu-miR-6516-3p	mmu-mir-6516	3	0.18	0	0	7	0.37	1	0.06
mmu-miR-652-5p	mmu-mir-652	239	14	119	10.43	147	7.7	153	9.45
mmu-miR-652-3p	mmu-mir-652	10524	616.4	7171	628.43	11922	624.59	10243	632.49
mmu-miR-653-5p	mmu-mir-653	3	0.18	4	0.35	3	0.16	2	0.12
mmu-miR-653-3p	mmu-mir-653	0	0	0	0	0	0	0	0
mmu-miR-6537-5p	mmu-mir-6537	0	0	0	0	0	0	0	0
mmu-miR-6537-3p	mmu-mir-6537	12	0.7	10	0.88	14	0.73	16	0.99
mmu-miR-6538	mmu-mir-6538	1	0.06	2	0.18	3	0.16	4	0.25
mmu-miR-6539	mmu-mir-6539	79	4.63	67	5.87	38	1.99	56	3.46
mmu-miR-654-5p	mmu-mir-654	0	0	0	0	0	0	0	0
mmu-miR-654-3p	mmu-mir-654	0	0	0	0	0	0	0	0
mmu-miR-6540-5p	mmu-mir-6540	0	0	0	0	0	0	0	0
mmu-miR-6540-3p	mmu-mir-6540	0	0	0	0	0	0	0	0
mmu-miR-6541	mmu-mir-6541	9	0.53	16	1.4	19	1	22	1.36
mmu-miR-6546-5p	mmu-mir-6546	16	0.94	11	0.96	19	1	11	0.68
mmu-miR-6546-3p	mmu-mir-6546	1	0.06	0	0	0	0	0	0
mmu-miR-664-5p	mmu-mir-664	814	47.68	770	67.48	1332	69.78	954	58.91
mmu-miR-664-3p	mmu-mir-664	420	24.6	351	30.76	473	24.78	436	26.92
mmu-miR-665-5p	mmu-mir-665	0	0	0	0	0	0	0	0
mmu-miR-665-3p	mmu-mir-665	0	0	0	0	0	0	0	0
mmu-miR-666-5p	mmu-mir-666	0	0	0	0	0	0	0	0
mmu-miR-666-3p	mmu-mir-666	0	0	0	0	0	0	0	0
mmu-miR-667-5p	mmu-mir-667	0	0	0	0	0	0	0	0
mmu-miR-667-3p	mmu-mir-667	0	0	0	0	0	0	0	0
mmu-miR-668-5p	mmu-mir-668	0	0	0	0	0	0	0	0
mmu-miR-668-3p	mmu-mir-668	0	0	0	0	0	0	0	0
mmu-miR-669a-5p	mmu-mir-669a-1	12.86	0.75	10.71	0.94	10.36	0.54	11.78	0.73
mmu-miR-669a-3p	mmu-mir-669a-1	5.91	0.35	6.04	0.53	7.62	0.4	10.43	0.64
mmu-miR-669a-5p	mmu-mir-669a-10	12.86	0.75	10.71	0.94	10.36	0.54	11.78	0.73
mmu-miR-669a-3p	mmu-mir-669a-10	5.91	0.35	6.04	0.53	7.62	0.4	10.43	0.64
mmu-miR-669a-5p	mmu-mir-669a-11	12.86	0.75	10.71	0.94	10.36	0.54	11.78	0.73
mmu-miR-669a-3p	mmu-mir-669a-11	5.91	0.35	6.04	0.53	7.62	0.4	10.43	0.64
mmu-miR-669a-5p	mmu-mir-669a-12	12.86	0.75	10.71	0.94	10.36	0.54	11.78	0.73
mmu-miR-669a-3p	mmu-mir-669a-12	5.91	0.35	6.04	0.53	7.62	0.4	10.43	0.64
mmu-miR-669a-5p	mmu-mir-669a-2	12.86	0.75	10.71	0.94	10.36	0.54	11.78	0.73
mmu-miR-669a-3p	mmu-mir-669a-2	5.91	0.35	6.04	0.53	7.62	0.4	10.43	0.64
mmu-miR-669a-5p	mmu-mir-669a-3	12.86	0.75	10.71	0.94	10.36	0.54	11.78	0.73
mmu-miR-669a-3-3p	mmu-mir-669a-3	3.08	0.18	0	0	0	0	1.3	0.08
mmu-miR-669a-5p	mmu-mir-669a-4	12.86	0.75	10.71	0.94	10.36	0.54	11.78	0.73
mmu-miR-669a-3p	mmu-mir-669a-4	5.91	0.35	6.04	0.53	7.62	0.4	10.43	0.64
mmu-miR-669a-5p	mmu-mir-669a-5	12.86	0.75	10.71	0.94	10.36	0.54	11.78	0.73
mmu-miR-669a-3p	mmu-mir-669a-5	5.91	0.35	6.04	0.53	7.62	0.4	10.43	0.64
mmu-miR-669a-5p	mmu-mir-669a-6	12.86	0.75	10.71	0.94	10.36	0.54	11.78	0.73
mmu-miR-669a-3p	mmu-mir-669a-6	5.91	0.35	6.04	0.53	7.62	0.4	10.43	0.64
mmu-miR-669a-5p	mmu-mir-669a-7	12.86	0.75	10.71	0.94	10.36	0.54	11.78	0.73
mmu-miR-669a-3p	mmu-mir-669a-7	5.91	0.35	6.04	0.53	7.62	0.4	10.43	0.64
mmu-miR-669a-5p	mmu-mir-669a-8	12.86	0.75	10.71	0.94	10.36	0.54	11.78	0.73
mmu-miR-669a-3p	mmu-mir-669a-8	5.91	0.35	6.04	0.53	7.62	0.4	10.43	0.64
mmu-miR-669a-5p	mmu-mir-669a-9	12.86	0.75	10.71	0.94	10.36	0.54	11.78	0.73
mmu-miR-669a-3p	mmu-mir-669a-9	5.91	0.35	6.04	0.53	7.62	0.4	10.43	0.64
mmu-miR-669b-5p	mmu-mir-669b	3.67	0.21	4.33	0.38	13.33	0.7	5.33	0.33
mmu-miR-669b-3p	mmu-mir-669b	2	0.12	2.5	0.22	2	0.1	1.2	0.07
mmu-miR-669c-5p	mmu-mir-669c	735	43.05	569	49.86	869	45.53	710.5	43.87
mmu-miR-669c-3p	mmu-mir-669c	0	0	0	0	0	0	0	0
mmu-miR-669d-5p	mmu-mir-669d	7.5	0.44	4.5	0.39	3	0.16	5.33	0.33
mmu-miR-669d-3p	mmu-mir-669d	0	0	0	0	0	0	0	0
mmu-miR-669d-2-3p	mmu-mir-669d	0	0	0	0	0	0	0	0
mmu-miR-669d-5p	mmu-mir-669d-2	7.5	0.44	4.5	0.39	3	0.16	6.33	0.39
mmu-miR-669d-3p	mmu-mir-669d-2	0	0	0	0	0	0	0	0
mmu-miR-669d-2-3p	mmu-mir-669d-2	0	0	0	0	0	0	0	0
mmu-miR-669e-5p	mmu-mir-669e	23	1.35	11	0.96	7	0.37	8	0.49
mmu-miR-669e-3p	mmu-mir-669e	0	0	0.5	0.04	0	0	1.5	0.09
mmu-miR-669f-5p	mmu-mir-669f	20.72	1.21	12.19	1.07	10.33	0.54	9.15	0.57
mmu-miR-669f-3p	mmu-mir-669f	14	0.82	4.07	0.36	10	0.52	24.2	1.49
mmu-miR-669g	mmu-mir-669g	0	0	0	0	0	0	0	0
mmu-miR-669h-5p	mmu-mir-669h	1	0.06	0	0	0.33	0.02	0	0
mmu-miR-669h-3p	mmu-mir-669h	0	0	0	0	0	0	0	0
mmu-miR-669i	mmu-mir-669i	0	0	0	0	0	0	0	0
mmu-miR-669j	mmu-mir-669j	0	0	0	0	0	0	0	0
mmu-miR-669k-5p	mmu-mir-669k	0	0	0	0	0.33	0.02	0	0
mmu-miR-669k-3p	mmu-mir-669k	0	0	0	0	0	0	0	0
mmu-miR-669l-5p	mmu-mir-669l	14.33	0.84	18	1.58	21.33	1.12	26.4	1.63
mmu-miR-669l-3p	mmu-mir-669l	0	0	0	0	0	0	0	0
mmu-miR-669m-5p	mmu-mir-669m-1	0.38	0.02	0.19	0.02	0	0	0.27	0.02
mmu-miR-669m-3p	mmu-mir-669m-1	0	0	0	0	0	0	0	0
mmu-miR-669m-5p	mmu-mir-669m-2	0.38	0.02	0.19	0.02	0	0	0.27	0.02
mmu-miR-669m-3p	mmu-mir-669m-2	0	0	0	0	0	0	0	0
mmu-miR-669n	mmu-mir-669n	0	0	0	0	0	0	0	0
mmu-miR-669o-5p	mmu-mir-669o	36.33	2.13	37	3.24	30.33	1.59	50.07	3.09
mmu-miR-669o-3p	mmu-mir-669o	5.91	0.35	6.04	0.53	7.62	0.4	10.43	0.64
mmu-miR-669p-5p	mmu-mir-669p-1	12.86	0.75	10.71	0.94	10.36	0.54	11.78	0.73
mmu-miR-669p-3p	mmu-mir-669p-1	0	0	2	0.18	0.5	0.03	1	0.06
mmu-miR-669p-5p	mmu-mir-669p-2	12.86	0.75	10.71	0.94	10.36	0.54	11.78	0.73
mmu-miR-669p-3p	mmu-mir-669p-2	0	0	2	0.18	0.5	0.03	1	0.06
mmu-miR-670-5p	mmu-mir-670	0	0	0	0	0	0	0	0
mmu-miR-670-3p	mmu-mir-670	0	0	0	0	0	0	0	0
mmu-miR-671-5p	mmu-mir-671	146	8.55	106	9.29	149	7.81	102	6.3
mmu-miR-671-3p	mmu-mir-671	612	35.85	563	49.34	983	51.5	766	47.3
mmu-miR-6715-5p	mmu-mir-6715	0	0	0	0	0	0	0	0
mmu-miR-6715-3p	mmu-mir-6715	0	0	0	0	0	0	0	0
mmu-miR-672-5p	mmu-mir-672	0	0	2	0.18	6	0.31	0	0
mmu-miR-672-3p	mmu-mir-672	0	0	0	0	0	0	0	0
mmu-miR-673-5p	mmu-mir-673	0	0	0	0	0	0	0	0
mmu-miR-673-3p	mmu-mir-673	0	0	0	0	0	0	0	0
mmu-miR-674-5p	mmu-mir-674	1028	60.21	764	66.95	1061	55.59	841	51.93
mmu-miR-674-3p	mmu-mir-674	11018	645.33	9442	827.45	16606	869.99	12986	801.87
mmu-miR-675-5p	mmu-mir-675	0	0	0	0	0	0	0	0
mmu-miR-675-3p	mmu-mir-675	0	0	0	0	0	0	0	0
mmu-miR-676-5p	mmu-mir-676	12	0.7	6	0.53	6	0.31	10	0.62
mmu-miR-676-3p	mmu-mir-676	20	1.17	9	0.79	12	0.63	24	1.48
mmu-miR-6769b-5p	mmu-mir-6769b	0	0	0	0	0	0	0	0
mmu-miR-6769b-3p	mmu-mir-6769b	0	0	0	0	1	0.05	0	0
mmu-miR-677-5p	mmu-mir-677	64	3.75	41	3.59	83	4.35	51	3.15
mmu-miR-677-3p	mmu-mir-677	3	0.18	2	0.18	4	0.21	0	0
mmu-miR-678	mmu-mir-678	0	0	0	0	0	0	0	0
mmu-miR-679-5p	mmu-mir-679	0	0	0	0	0	0	0	0
mmu-miR-679-3p	mmu-mir-679	0	0	0	0	0	0	0	0
mmu-miR-680	mmu-mir-680-1	0	0	0	0	0	0	0	0
mmu-miR-680	mmu-mir-680-2	0	0	0	0	0	0	0	0
mmu-miR-680	mmu-mir-680-3	0	0	0	0	0	0	0	0
mmu-miR-681	mmu-mir-681	0	0	0	0	0	0	0	0
mmu-miR-682	mmu-mir-682	0	0	0	0	0	0	0	0
mmu-miR-683	mmu-mir-683-1	0	0	0	0	0	0	0	0
mmu-miR-683	mmu-mir-683-2	0	0	0	0	0	0	0	0
mmu-miR-684	mmu-mir-684-1	0	0	0	0	0	0	0	0
mmu-miR-684	mmu-mir-684-2	0	0	0	0	0	0	0	0
mmu-miR-686	mmu-mir-686	0	0	0	0	0	0	0	0
mmu-miR-687	mmu-mir-687	0	0	0	0	0	0	0	0
mmu-miR-688	mmu-mir-688	0	0	1	0.09	0	0	0	0
mmu-miR-6896-5p	mmu-mir-6896	1	0.06	0	0	1	0.05	1	0.06
mmu-miR-6896-3p	mmu-mir-6896	0	0	0	0	0	0	0	0
mmu-miR-6897-5p	mmu-mir-6897	1	0.06	1	0.09	0	0	0	0
mmu-miR-6897-3p	mmu-mir-6897	0	0	0	0	0	0	1	0.06
mmu-miR-6898-5p	mmu-mir-6898	2	0.12	5	0.44	0	0	2	0.12
mmu-miR-6898-3p	mmu-mir-6898	1	0.06	4	0.35	1	0.05	0	0
mmu-miR-6899-5p	mmu-mir-6899	0	0	0	0	0	0	1	0.06
mmu-miR-6899-3p	mmu-mir-6899	14	0.82	11	0.96	14	0.73	16	0.99
mmu-miR-690	mmu-mir-690	28	1.64	21	1.84	36	1.89	31	1.91
mmu-miR-6900-5p	mmu-mir-6900	5	0.29	1	0.09	3	0.16	4	0.25
mmu-miR-6900-3p	mmu-mir-6900	17	1	20	1.75	14	0.73	18	1.11
mmu-miR-6901-5p	mmu-mir-6901	0	0	0	0	0	0	0	0
mmu-miR-6901-3p	mmu-mir-6901	0	0	0	0	0	0	0	0
mmu-miR-6902-5p	mmu-mir-6902	1	0.06	0	0	1	0.05	0	0
mmu-miR-6902-3p	mmu-mir-6902	0	0	0	0	0	0	1	0.06
mmu-miR-6903-5p	mmu-mir-6903	0	0	0	0	0	0	0	0
mmu-miR-6903-3p	mmu-mir-6903	2	0.12	2	0.18	1	0.05	1	0.06
mmu-miR-6904-5p	mmu-mir-6904	0	0	2	0.18	3	0.16	1	0.06
mmu-miR-6904-3p	mmu-mir-6904	1	0.06	0	0	0	0	1	0.06
mmu-miR-6905-5p	mmu-mir-6905	0	0	0	0	0	0	1	0.06
mmu-miR-6905-3p	mmu-mir-6905	0	0	0	0	0	0	0	0
mmu-miR-6906-5p	mmu-mir-6906	0	0	0	0	0	0	0	0
mmu-miR-6906-3p	mmu-mir-6906	0	0	0	0	0	0	0	0
mmu-miR-6907-5p	mmu-mir-6907	1	0.06	0	0	0	0	2	0.12
mmu-miR-6907-3p	mmu-mir-6907	0	0	0	0	0	0	1	0.06
mmu-miR-6908-5p	mmu-mir-6908	0	0	1	0.09	0	0	0	0
mmu-miR-6908-3p	mmu-mir-6908	1	0.06	0	0	0	0	1	0.06
mmu-miR-6909-5p	mmu-mir-6909	10	0.59	9	0.79	19	1	8	0.49
mmu-miR-6909-3p	mmu-mir-6909	3	0.18	0	0	2	0.1	0	0
mmu-miR-691	mmu-mir-691	0	0	0	0	0	0	0	0
mmu-miR-6910-5p	mmu-mir-6910	0	0	0	0	0	0	1	0.06
mmu-miR-6910-3p	mmu-mir-6910	5	0.29	1	0.09	0	0	2	0.12
mmu-miR-6911-5p	mmu-mir-6911	7	0.41	9	0.79	19	1	11	0.68
mmu-miR-6911-3p	mmu-mir-6911	18	1.05	11	0.96	16	0.84	14	0.86
mmu-miR-6912-5p	mmu-mir-6912	3	0.18	7	0.61	9	0.47	3	0.19
mmu-miR-6912-3p	mmu-mir-6912	1	0.06	1	0.09	0	0	1	0.06
mmu-miR-6913-5p	mmu-mir-6913	2	0.12	0	0	0	0	1	0.06
mmu-miR-6913-3p	mmu-mir-6913	2	0.12	0	0	3	0.16	4	0.25
mmu-miR-6914-5p	mmu-mir-6914	1	0.06	0	0	0	0	0	0
mmu-miR-6914-3p	mmu-mir-6914	11	0.64	5	0.44	7	0.37	9	0.56
mmu-miR-6915-5p	mmu-mir-6915	0	0	0	0	0	0	0	0
mmu-miR-6915-3p	mmu-mir-6915	0	0	3	0.26	1	0.05	1	0.06
mmu-miR-6916-5p	mmu-mir-6916	18	1.05	7	0.61	12	0.63	9	0.56
mmu-miR-6916-3p	mmu-mir-6916	3	0.18	1	0.09	4	0.21	6	0.37
mmu-miR-6917-5p	mmu-mir-6917	0	0	0	0	0	0	0	0
mmu-miR-6917-3p	mmu-mir-6917	0	0	0	0	0	0	0	0
mmu-miR-6918-5p	mmu-mir-6918	3	0.18	0	0	0	0	0	0
mmu-miR-6918-3p	mmu-mir-6918	0	0	0	0	0	0	1	0.06
mmu-miR-6919-5p	mmu-mir-6919	1	0.06	4	0.35	3	0.16	3	0.19
mmu-miR-6919-3p	mmu-mir-6919	0	0	1	0.09	0	0	0	0
mmu-miR-692	mmu-mir-692-1	0	0	0	0	0.33	0.02	0	0
mmu-miR-692	mmu-mir-692-2	0	0	0	0	0.33	0.02	0	0
mmu-miR-692	mmu-mir-692-3	0	0	0	0	0.33	0.02	0	0
mmu-miR-6920-5p	mmu-mir-6920	1	0.06	0	0	2	0.1	1	0.06
mmu-miR-6920-3p	mmu-mir-6920	2	0.12	1	0.09	1	0.05	0	0
mmu-miR-6921-5p	mmu-mir-6921	0	0	0	0	0	0	0	0
mmu-miR-6921-3p	mmu-mir-6921	0	0	0	0	0	0	0	0
mmu-miR-6922-5p	mmu-mir-6922	8	0.47	1	0.09	7	0.37	2	0.12
mmu-miR-6922-3p	mmu-mir-6922	1	0.06	0	0	0	0	1	0.06
mmu-miR-6923-5p	mmu-mir-6923	0	0	0	0	0	0	0	0
mmu-miR-6923-3p	mmu-mir-6923	0	0	0	0	0	0	0	0
mmu-miR-6924-5p	mmu-mir-6924	0	0	0	0	0	0	0	0
mmu-miR-6924-3p	mmu-mir-6924	0	0	0	0	0	0	0	0
mmu-miR-6925-5p	mmu-mir-6925	0	0	2	0.18	2	0.1	2	0.12
mmu-miR-6925-3p	mmu-mir-6925	0	0	0	0	0	0	0	0
mmu-miR-6926-5p	mmu-mir-6926	0	0	0	0	1	0.05	0	0
mmu-miR-6926-3p	mmu-mir-6926	0	0	0	0	0	0	0	0
mmu-miR-6927-5p	mmu-mir-6927	0	0	0	0	1	0.05	0	0
mmu-miR-6927-3p	mmu-mir-6927	0	0	2	0.18	1	0.05	2	0.12
mmu-miR-6928-5p	mmu-mir-6928	2	0.12	3	0.26	8	0.42	10	0.62
mmu-miR-6928-3p	mmu-mir-6928	13	0.76	13	1.14	26	1.36	27	1.67
mmu-miR-6929-5p	mmu-mir-6929	0	0	0	0	0	0	0	0
mmu-miR-6929-3p	mmu-mir-6929	2	0.12	4	0.35	4	0.21	7	0.43
mmu-miR-693-5p	mmu-mir-693	0	0	0	0	0	0	0	0
mmu-miR-693-3p	mmu-mir-693	2	0.12	0	0	0	0	2	0.12
mmu-miR-6930-5p	mmu-mir-6930	0	0	1	0.09	0	0	0	0
mmu-miR-6930-3p	mmu-mir-6930	0	0	0	0	0	0	0	0
mmu-miR-6931-5p	mmu-mir-6931	0	0	0	0	0	0	0	0
mmu-miR-6931-3p	mmu-mir-6931	0	0	0	0	0	0	0	0
mmu-miR-6932-5p	mmu-mir-6932	1	0.06	1	0.09	5	0.26	3	0.19
mmu-miR-6932-3p	mmu-mir-6932	0	0	1	0.09	2	0.1	1	0.06
mmu-miR-6933-5p	mmu-mir-6933	48	2.81	36	3.15	92	4.82	57	3.52
mmu-miR-6933-3p	mmu-mir-6933	3	0.18	0	0	3	0.16	0	0
mmu-miR-6934-5p	mmu-mir-6934	3	0.18	0	0	2	0.1	2	0.12
mmu-miR-6934-3p	mmu-mir-6934	0	0	0	0	0	0	0	0
mmu-miR-6935-5p	mmu-mir-6935	0	0	0	0	1	0.05	0	0
mmu-miR-6935-3p	mmu-mir-6935	0	0	0	0	0	0	2	0.12
mmu-miR-6936-5p	mmu-mir-6936	0	0	0	0	0	0	0	0
mmu-miR-6936-3p	mmu-mir-6936	2	0.12	0	0	0	0	1	0.06
mmu-miR-6937-5p	mmu-mir-6937	3	0.18	1	0.09	2	0.1	2	0.12
mmu-miR-6937-3p	mmu-mir-6937	0	0	0	0	0	0	0	0
mmu-miR-6938-5p	mmu-mir-6938	0	0	0	0	0	0	0	0
mmu-miR-6938-3p	mmu-mir-6938	6	0.35	0	0	2	0.1	1	0.06
mmu-miR-6939-5p	mmu-mir-6939	0	0	0	0	0	0	1	0.06
mmu-miR-6939-3p	mmu-mir-6939	3	0.18	1	0.09	3	0.16	3	0.19
mmu-miR-694	mmu-mir-694	0	0	0	0	0	0	0	0
mmu-miR-6940-5p	mmu-mir-6940	0	0	0	0	0	0	0	0
mmu-miR-6940-3p	mmu-mir-6940	3	0.18	1	0.09	0	0	3	0.19
mmu-miR-6941-5p	mmu-mir-6941	0	0	0	0	0	0	0	0
mmu-miR-6941-3p	mmu-mir-6941	0	0	1	0.09	0	0	0	0
mmu-miR-6942-5p	mmu-mir-6942	9	0.53	15	1.31	13	0.68	12	0.74
mmu-miR-6942-3p	mmu-mir-6942	1	0.06	0	0	0	0	4	0.25
mmu-miR-6943-5p	mmu-mir-6943	0	0	1	0.09	1	0.05	1	0.06
mmu-miR-6943-3p	mmu-mir-6943	0	0	0	0	1	0.05	1	0.06
mmu-miR-6944-5p	mmu-mir-6944	0	0	0	0	0	0	0	0
mmu-miR-6944-3p	mmu-mir-6944	0	0	0	0	1	0.05	1	0.06
mmu-miR-6945-5p	mmu-mir-6945	0	0	0	0	0	0	0	0
mmu-miR-6945-3p	mmu-mir-6945	25	1.46	21	1.84	39	2.04	22	1.36
mmu-miR-6946-5p	mmu-mir-6946	4	0.23	3	0.26	4	0.21	1	0.06
mmu-miR-6946-3p	mmu-mir-6946	3	0.18	2	0.18	2	0.1	3	0.19
mmu-miR-6947-5p	mmu-mir-6947	5	0.29	2	0.18	11	0.58	3	0.19
mmu-miR-6947-3p	mmu-mir-6947	0	0	0	0	0	0	0	0
mmu-miR-6948-5p	mmu-mir-6948	14	0.82	3	0.26	16	0.84	4	0.25
mmu-miR-6948-3p	mmu-mir-6948	7	0.41	4	0.35	7	0.37	5	0.31
mmu-miR-6949-5p	mmu-mir-6949	0	0	0	0	0	0	0	0
mmu-miR-6949-3p	mmu-mir-6949	0	0	0	0	0	0	0	0
mmu-miR-695	mmu-mir-695	0	0	0	0	0	0	0	0
mmu-miR-6950-5p	mmu-mir-6950	0	0	0	0	0	0	0	0
mmu-miR-6950-3p	mmu-mir-6950	0	0	0	0	0	0	0	0
mmu-miR-6951-5p	mmu-mir-6951	15	0.88	14	1.23	14	0.73	9	0.56
mmu-miR-6951-3p	mmu-mir-6951	0	0	0	0	0	0	0	0
mmu-miR-6952-5p	mmu-mir-6952	2	0.12	2	0.18	4	0.21	5	0.31
mmu-miR-6952-3p	mmu-mir-6952	13	0.76	6	0.53	13	0.68	25	1.54
mmu-miR-6953-5p	mmu-mir-6953	0	0	0	0	0	0	0	0
mmu-miR-6953-3p	mmu-mir-6953	0	0	0	0	1	0.05	0	0
mmu-miR-6954-5p	mmu-mir-6954	2	0.12	1	0.09	2	0.1	1	0.06
mmu-miR-6954-3p	mmu-mir-6954	4	0.23	4	0.35	2	0.1	7	0.43
mmu-miR-6955-5p	mmu-mir-6955	22	1.29	10	0.88	19	1	21	1.3
mmu-miR-6955-3p	mmu-mir-6955	6	0.35	9	0.79	7	0.37	10	0.62
mmu-miR-6956-5p	mmu-mir-6956	0	0	1	0.09	1	0.05	0	0
mmu-miR-6956-3p	mmu-mir-6956	2	0.12	0	0	3	0.16	2	0.12
mmu-miR-6957-5p	mmu-mir-6957	0	0	0	0	0	0	0	0
mmu-miR-6957-3p	mmu-mir-6957	0	0	0	0	0	0	0	0
mmu-miR-6958-5p	mmu-mir-6958	0	0	0	0	0	0	0	0
mmu-miR-6958-3p	mmu-mir-6958	1	0.06	0	0	2	0.1	4	0.25
mmu-miR-6959-5p	mmu-mir-6959	14	0.82	7	0.61	7	0.37	7	0.43
mmu-miR-6959-3p	mmu-mir-6959	0	0	1	0.09	1	0.05	2	0.12
mmu-miR-696	mmu-mir-696	0	0	0	0	0	0	0	0
mmu-miR-6960-5p	mmu-mir-6960	28	1.64	29	2.54	43	2.25	44	2.72
mmu-miR-6960-3p	mmu-mir-6960	0	0	0	0	0	0	0	0
mmu-miR-6961-5p	mmu-mir-6961	1	0.06	1	0.09	0	0	3	0.19
mmu-miR-6961-3p	mmu-mir-6961	0	0	1	0.09	1	0.05	0	0
mmu-miR-6962-5p	mmu-mir-6962	1	0.06	0	0	1	0.05	1	0.06
mmu-miR-6962-3p	mmu-mir-6962	0	0	0	0	1	0.05	0	0
mmu-miR-6963-5p	mmu-mir-6963	5	0.29	1	0.09	4	0.21	4	0.25
mmu-miR-6963-3p	mmu-mir-6963	7	0.41	5	0.44	2	0.1	4	0.25
mmu-miR-6964-5p	mmu-mir-6964	1	0.06	1	0.09	0	0	0	0
mmu-miR-6964-3p	mmu-mir-6964	0	0	2	0.18	3	0.16	0	0
mmu-miR-6965-5p	mmu-mir-6965	0	0	0	0	0	0	0	0
mmu-miR-6965-3p	mmu-mir-6965	9	0.53	6	0.53	13	0.68	14	0.86
mmu-miR-6966-5p	mmu-mir-6966	3	0.18	1	0.09	6	0.31	2	0.12
mmu-miR-6966-3p	mmu-mir-6966	25	1.46	10	0.88	5	0.26	29	1.79
mmu-miR-6967-5p	mmu-mir-6967-1	4.5	0.26	4	0.35	4	0.21	3.5	0.22
mmu-miR-6967-3p	mmu-mir-6967-1	0.5	0.03	0	0	0	0	1.5	0.09
mmu-miR-6967-5p	mmu-mir-6967-2	4.5	0.26	4	0.35	4	0.21	3.5	0.22
mmu-miR-6967-3p	mmu-mir-6967-2	0.5	0.03	0	0	0	0	1.5	0.09
mmu-miR-6968-5p	mmu-mir-6968	0	0	0	0	0	0	1	0.06
mmu-miR-6968-3p	mmu-mir-6968	3	0.18	4	0.35	3	0.16	7	0.43
mmu-miR-6969-5p	mmu-mir-6969	0	0	0	0	0	0	0	0
mmu-miR-6969-3p	mmu-mir-6969	0	0	0	0	0	0	0	0
mmu-miR-697	mmu-mir-697	0	0	0	0	0	0	0	0
mmu-miR-6970-5p	mmu-mir-6970	7	0.41	2	0.18	8	0.42	11	0.68
mmu-miR-6970-3p	mmu-mir-6970	12	0.7	5	0.44	12	0.63	2	0.12
mmu-miR-6971-5p	mmu-mir-6971	0	0	1	0.09	0	0	2	0.12
mmu-miR-6971-3p	mmu-mir-6971	0	0	1	0.09	1	0.05	1	0.06
mmu-miR-6972-5p	mmu-mir-6972	0	0	0	0	0	0	0	0
mmu-miR-6972-3p	mmu-mir-6972	0	0	0	0	0	0	0	0
mmu-miR-6973a-5p	mmu-mir-6973a	0	0	0	0	0	0	0	0
mmu-miR-6973a-3p	mmu-mir-6973a	0	0	0	0	0	0	0	0
mmu-miR-6973b-5p	mmu-mir-6973b	0	0	0	0	0	0	0	0
mmu-miR-6973b-3p	mmu-mir-6973b	0	0	0	0	0	0	0	0
mmu-miR-6974-5p	mmu-mir-6974	0	0	0	0	0	0	0	0
mmu-miR-6974-3p	mmu-mir-6974	0	0	0	0	0	0	0	0
mmu-miR-6975-5p	mmu-mir-6975	0	0	0	0	0	0	1	0.06
mmu-miR-6975-3p	mmu-mir-6975	1	0.06	3	0.26	8	0.42	8	0.49
mmu-miR-6976-5p	mmu-mir-6976	1	0.06	0	0	0	0	1	0.06
mmu-miR-6976-3p	mmu-mir-6976	0	0	0	0	1	0.05	0	0
mmu-miR-6977-5p	mmu-mir-6977	1	0.06	0	0	0	0	0	0
mmu-miR-6977-3p	mmu-mir-6977	4	0.23	6	0.53	4	0.21	2	0.12
mmu-miR-6978-5p	mmu-mir-6978	0	0	0	0	0	0	0	0
mmu-miR-6978-3p	mmu-mir-6978	1	0.06	0	0	7	0.37	0	0
mmu-miR-6979-5p	mmu-mir-6979	0	0	0	0	0	0	0	0
mmu-miR-6979-3p	mmu-mir-6979	2	0.12	0	0	6	0.31	6	0.37
mmu-miR-698-5p	mmu-mir-698	1	0.06	0	0	0	0	4	0.25
mmu-miR-698-3p	mmu-mir-698	1	0.06	0	0	0	0	0	0
mmu-miR-6980-5p	mmu-mir-6980	2	0.12	2	0.18	1	0.05	0	0
mmu-miR-6980-3p	mmu-mir-6980	2	0.12	0	0	2	0.1	1	0.06
mmu-miR-6981-5p	mmu-mir-6981	0	0	0	0	0	0	0	0
mmu-miR-6981-3p	mmu-mir-6981	0	0	0	0	0	0	0	0
mmu-miR-6982-5p	mmu-mir-6982	0	0	0	0	0	0	0	0
mmu-miR-6982-3p	mmu-mir-6982	0	0	0	0	0	0	0	0
mmu-miR-6983-5p	mmu-mir-6983	3	0.18	2	0.18	8	0.42	2	0.12
mmu-miR-6983-3p	mmu-mir-6983	7	0.41	4	0.35	5	0.26	1	0.06
mmu-miR-6984-5p	mmu-mir-6984	3	0.18	9	0.79	5	0.26	1	0.06
mmu-miR-6984-3p	mmu-mir-6984	2	0.12	0	0	0	0	0	0
mmu-miR-6985-5p	mmu-mir-6985	3	0.18	2	0.18	5	0.26	3	0.19
mmu-miR-6985-3p	mmu-mir-6985	0	0	0	0	0	0	0	0
mmu-miR-6986-5p	mmu-mir-6986	3	0.18	5	0.44	3	0.16	4	0.25
mmu-miR-6986-3p	mmu-mir-6986	0	0	0	0	0	0	0	0
mmu-miR-6987-5p	mmu-mir-6987	1	0.06	0	0	2	0.1	5	0.31
mmu-miR-6987-3p	mmu-mir-6987	0	0	0	0	0	0	0	0
mmu-miR-6988-5p	mmu-mir-6988	0	0	0	0	0	0	0	0
mmu-miR-6988-3p	mmu-mir-6988	13	0.76	13	1.14	17	0.89	9	0.56
mmu-miR-6989-5p	mmu-mir-6989	0	0	0	0	1	0.05	0	0
mmu-miR-6989-3p	mmu-mir-6989	5	0.29	3	0.26	6	0.31	5	0.31
mmu-miR-6990-5p	mmu-mir-6990	5	0.29	9	0.79	7	0.37	5	0.31
mmu-miR-6990-3p	mmu-mir-6990	0	0	0	0	0	0	0	0
mmu-miR-6991-5p	mmu-mir-6991	0	0	0	0	0	0	0	0
mmu-miR-6991-3p	mmu-mir-6991	0	0	0	0	0	0	0	0
mmu-miR-6992-5p	mmu-mir-6992	2	0.12	4	0.35	1	0.05	5	0.31
mmu-miR-6992-3p	mmu-mir-6992	0	0	0	0	0	0	0	0
mmu-miR-6993-5p	mmu-mir-6993	1	0.06	3	0.26	4	0.21	3	0.19
mmu-miR-6993-3p	mmu-mir-6993	0	0	0	0	2	0.1	0	0
mmu-miR-6994-5p	mmu-mir-6994	1	0.06	0	0	1	0.05	0	0
mmu-miR-6994-3p	mmu-mir-6994	18	1.05	10	0.88	26	1.36	27	1.67
mmu-miR-6995-5p	mmu-mir-6995	0	0	0	0	2	0.1	0	0
mmu-miR-6995-3p	mmu-mir-6995	0	0	0	0	0	0	0	0
mmu-miR-6996-5p	mmu-mir-6996	1	0.06	1	0.09	0	0	0	0
mmu-miR-6996-3p	mmu-mir-6996	1	0.06	1	0.09	6	0.31	2	0.12
mmu-miR-6997-5p	mmu-mir-6997	22	1.29	19	1.67	21	1.1	29	1.79
mmu-miR-6997-3p	mmu-mir-6997	5	0.29	8	0.7	1	0.05	4	0.25
mmu-miR-6998-5p	mmu-mir-6998	1	0.06	2	0.18	2	0.1	2	0.12
mmu-miR-6998-3p	mmu-mir-6998	2	0.12	2	0.18	2	0.1	3	0.19
mmu-miR-6999-5p	mmu-mir-6999	1	0.06	0	0	0	0	0	0
mmu-miR-6999-3p	mmu-mir-6999	0	0	3	0.26	1	0.05	3	0.19
mmu-miR-700-5p	mmu-mir-700	744	43.58	468	41.01	648	33.95	574	35.44
mmu-miR-700-3p	mmu-mir-700	1440	84.34	1308	114.63	1951	102.21	1392	85.95
mmu-miR-7000-5p	mmu-mir-7000	0	0	0	0	0	0	0	0
mmu-miR-7000-3p	mmu-mir-7000	0	0	0	0	0	0	0	0
mmu-miR-7001-5p	mmu-mir-7001	1	0.06	2	0.18	0	0	2	0.12
mmu-miR-7001-3p	mmu-mir-7001	0	0	0	0	0	0	1	0.06
mmu-miR-7002-5p	mmu-mir-7002	1	0.06	1	0.09	2	0.1	1	0.06
mmu-miR-7002-3p	mmu-mir-7002	0	0	0	0	0	0	0	0
mmu-miR-7003-5p	mmu-mir-7003	0	0	4	0.35	0	0	0	0
mmu-miR-7003-3p	mmu-mir-7003	0	0	0	0	0	0	0	0
mmu-miR-7004-5p	mmu-mir-7004	0	0	2	0.18	0	0	0	0
mmu-miR-7004-3p	mmu-mir-7004	0	0	0	0	0	0	0	0
mmu-miR-7005-5p	mmu-mir-7005	0	0	0	0	0	0	0	0
mmu-miR-7005-3p	mmu-mir-7005	0	0	0	0	0	0	0	0
mmu-miR-7006-5p	mmu-mir-7006	0	0	0	0	0	0	0	0
mmu-miR-7006-3p	mmu-mir-7006	0	0	0	0	1	0.05	2	0.12
mmu-miR-7007-5p	mmu-mir-7007	0	0	0	0	0	0	0	0
mmu-miR-7007-3p	mmu-mir-7007	0	0	0	0	0	0	0	0
mmu-miR-7008-5p	mmu-mir-7008	0	0	0	0	0	0	1	0.06
mmu-miR-7008-3p	mmu-mir-7008	0	0	0	0	1	0.05	0	0
mmu-miR-7009-5p	mmu-mir-7009	18	1.05	16	1.4	13	0.68	23	1.42
mmu-miR-7009-3p	mmu-mir-7009	1	0.06	0	0	1	0.05	0	0
mmu-miR-701-5p	mmu-mir-701	4	0.23	2	0.18	3	0.16	3	0.19
mmu-miR-701-3p	mmu-mir-701	0	0	1	0.09	0	0	0	0
mmu-miR-7010-5p	mmu-mir-7010	0	0	0	0	0	0	0	0
mmu-miR-7010-3p	mmu-mir-7010	0	0	0	0	0	0	0	0
mmu-miR-7011-5p	mmu-mir-7011	0	0	0	0	0	0	0	0
mmu-miR-7011-3p	mmu-mir-7011	1	0.06	0	0	1	0.05	0	0
mmu-miR-7012-5p	mmu-mir-7012	5	0.29	7	0.61	19	1	22	1.36
mmu-miR-7012-3p	mmu-mir-7012	11	0.64	6	0.53	8	0.42	6	0.37
mmu-miR-7013-5p	mmu-mir-7013	1	0.06	1	0.09	6	0.31	4	0.25
mmu-miR-7013-3p	mmu-mir-7013	4	0.23	6	0.53	4	0.21	1	0.06
mmu-miR-7014-5p	mmu-mir-7014	3	0.18	6	0.53	1	0.05	0	0
mmu-miR-7014-3p	mmu-mir-7014	0	0	0	0	0	0	0	0
mmu-miR-7015-5p	mmu-mir-7015	7	0.41	2	0.18	5	0.26	7	0.43
mmu-miR-7015-3p	mmu-mir-7015	14	0.82	15	1.31	38	1.99	20	1.23
mmu-miR-7016-5p	mmu-mir-7016	0	0	5	0.44	0	0	1	0.06
mmu-miR-7016-3p	mmu-mir-7016	0	0	0	0	0	0	0	0
mmu-miR-7017-5p	mmu-mir-7017	2	0.12	6	0.53	1	0.05	6	0.37
mmu-miR-7017-3p	mmu-mir-7017	0	0	1	0.09	0	0	1	0.06
mmu-miR-7018-5p	mmu-mir-7018	0	0	0	0	0	0	0	0
mmu-miR-7018-3p	mmu-mir-7018	0	0	0	0	0	0	0	0
mmu-miR-7019-5p	mmu-mir-7019	1	0.06	0	0	2	0.1	0	0
mmu-miR-7019-3p	mmu-mir-7019	7	0.41	11	0.96	11	0.58	9	0.56
mmu-miR-702-5p	mmu-mir-702	13	0.76	2	0.18	10	0.52	6	0.37
mmu-miR-702-3p	mmu-mir-702	7	0.41	7	0.61	7	0.37	6	0.37
mmu-miR-7020-5p	mmu-mir-7020	1	0.06	1	0.09	1	0.05	1	0.06
mmu-miR-7020-3p	mmu-mir-7020	0	0	0	0	0	0	0	0
mmu-miR-7021-5p	mmu-mir-7021	19	1.11	13	1.14	33	1.73	15	0.93
mmu-miR-7021-3p	mmu-mir-7021	0	0	0	0	2	0.1	1	0.06
mmu-miR-7022-5p	mmu-mir-7022	7	0.41	6	0.53	16	0.84	2	0.12
mmu-miR-7022-3p	mmu-mir-7022	1	0.06	0	0	0	0	0	0
mmu-miR-7023-5p	mmu-mir-7023	0	0	1	0.09	0	0	0	0
mmu-miR-7023-3p	mmu-mir-7023	0	0	1	0.09	1	0.05	0	0
mmu-miR-7024-5p	mmu-mir-7024	4	0.23	1	0.09	3	0.16	4	0.25
mmu-miR-7024-3p	mmu-mir-7024	0	0	0	0	0	0	0	0
mmu-miR-7025-5p	mmu-mir-7025	0	0	0	0	0	0	0	0
mmu-miR-7025-3p	mmu-mir-7025	0	0	0	0	0	0	0	0
mmu-miR-7026-5p	mmu-mir-7026	8	0.47	9	0.79	5	0.26	1	0.06
mmu-miR-7026-3p	mmu-mir-7026	3	0.18	1	0.09	3	0.16	1	0.06
mmu-miR-7027-5p	mmu-mir-7027	0	0	0	0	0	0	0	0
mmu-miR-7027-3p	mmu-mir-7027	0	0	0	0	1	0.05	0	0
mmu-miR-7028-5p	mmu-mir-7028	2	0.12	0	0	1	0.05	2	0.12
mmu-miR-7028-3p	mmu-mir-7028	0	0	0	0	0	0	0	0
mmu-miR-7029-5p	mmu-mir-7029	0	0	0	0	0	0	0	0
mmu-miR-7029-3p	mmu-mir-7029	4	0.23	3	0.26	8	0.42	3	0.19
mmu-miR-703	mmu-mir-703	0	0	0	0	0	0	0	0
mmu-miR-7030-5p	mmu-mir-7030	5	0.29	1	0.09	1	0.05	3	0.19
mmu-miR-7030-3p	mmu-mir-7030	14	0.82	7	0.61	12	0.63	10	0.62
mmu-miR-7031-5p	mmu-mir-7031	34	1.99	12	1.05	19	1	16	0.99
mmu-miR-7031-3p	mmu-mir-7031	1	0.06	2	0.18	0	0	0	0
mmu-miR-7032-5p	mmu-mir-7032	0	0	0	0	0	0	0	0
mmu-miR-7032-3p	mmu-mir-7032	0	0	0	0	0	0	0	0
mmu-miR-7033-5p	mmu-mir-7033	3	0.18	3	0.26	9	0.47	4	0.25
mmu-miR-7033-3p	mmu-mir-7033	0	0	0	0	0	0	0	0
mmu-miR-7034-5p	mmu-mir-7034	8	0.47	2	0.18	7	0.37	1	0.06
mmu-miR-7034-3p	mmu-mir-7034	2	0.12	0	0	2	0.1	3	0.19
mmu-miR-7035-5p	mmu-mir-7035	4	0.23	0	0	1	0.05	1	0.06
mmu-miR-7035-3p	mmu-mir-7035	1	0.06	1	0.09	1	0.05	9	0.56
mmu-miR-7036a-5p	mmu-mir-7036a	0	0	0	0	0	0	0	0
mmu-miR-7036a-3p	mmu-mir-7036a	5	0.29	3	0.26	1	0.05	4	0.25
mmu-miR-7036b-5p	mmu-mir-7036b	10	0.59	9	0.79	12	0.63	6	0.37
mmu-miR-7036b-3p	mmu-mir-7036b	2	0.12	0	0	0	0	1	0.06
mmu-miR-7037-5p	mmu-mir-7037	0	0	1	0.09	0	0	0	0
mmu-miR-7037-3p	mmu-mir-7037	0	0	0	0	0	0	0	0
mmu-miR-7038-5p	mmu-mir-7038	7	0.41	5	0.44	3	0.16	2	0.12
mmu-miR-7038-3p	mmu-mir-7038	0	0	0	0	0	0	0	0
mmu-miR-7039-5p	mmu-mir-7039	2	0.12	0	0	0	0	0	0
mmu-miR-7039-3p	mmu-mir-7039	0	0	0	0	0	0	0	0
mmu-miR-704	mmu-mir-704	292	17.1	163	14.28	249	13.05	283	17.47
mmu-miR-7040-5p	mmu-mir-7040	5	0.29	1	0.09	1	0.05	0	0
mmu-miR-7040-3p	mmu-mir-7040	0	0	0	0	0	0	0	0
mmu-miR-7041-5p	mmu-mir-7041	0	0	0	0	0	0	0	0
mmu-miR-7041-3p	mmu-mir-7041	0	0	0	0	0	0	0	0
mmu-miR-7042-5p	mmu-mir-7042	4	0.23	4	0.35	2	0.1	4	0.25
mmu-miR-7042-3p	mmu-mir-7042	9	0.53	10	0.88	6	0.31	4	0.25
mmu-miR-7043-5p	mmu-mir-7043	4	0.23	0	0	4	0.21	2	0.12
mmu-miR-7043-3p	mmu-mir-7043	132	7.73	88	7.71	259	13.57	201	12.41
mmu-miR-7044-5p	mmu-mir-7044	0	0	0	0	0	0	0	0
mmu-miR-7044-3p	mmu-mir-7044	0	0	0	0	1	0.05	0	0
mmu-miR-7045-5p	mmu-mir-7045	0	0	0	0	0	0	0	0
mmu-miR-7045-3p	mmu-mir-7045	0	0	0	0	0	0	0	0
mmu-miR-7046-5p	mmu-mir-7046	2	0.12	1	0.09	6	0.31	2	0.12
mmu-miR-7046-3p	mmu-mir-7046	1	0.06	0	0	2	0.1	0	0
mmu-miR-7047-5p	mmu-mir-7047	1	0.06	0	0	1	0.05	2	0.12
mmu-miR-7047-3p	mmu-mir-7047	1	0.06	5	0.44	3	0.16	3	0.19
mmu-miR-7048-5p	mmu-mir-7048	0	0	0	0	0	0	0	0
mmu-miR-7048-3p	mmu-mir-7048	0	0	0	0	0	0	0	0
mmu-miR-7049-5p	mmu-mir-7049	1	0.06	1	0.09	1	0.05	0	0
mmu-miR-7049-3p	mmu-mir-7049	0	0	0	0	0	0	0	0
mmu-miR-705	mmu-mir-705	0	0	0	0	0	0	0	0
mmu-miR-7050-5p	mmu-mir-7050	5	0.29	3	0.26	5	0.26	4	0.25
mmu-miR-7050-3p	mmu-mir-7050	1	0.06	0	0	0	0	0	0
mmu-miR-7051-5p	mmu-mir-7051	0	0	0	0	1	0.05	0	0
mmu-miR-7051-3p	mmu-mir-7051	0	0	0	0	0	0	0	0
mmu-miR-7052-5p	mmu-mir-7052	0	0	0	0	0	0	2	0.12
mmu-miR-7052-3p	mmu-mir-7052	0	0	0	0	0	0	0	0
mmu-miR-7053-5p	mmu-mir-7053	0	0	0	0	0	0	0	0
mmu-miR-7053-3p	mmu-mir-7053	0	0	2	0.18	1	0.05	0	0
mmu-miR-7054-5p	mmu-mir-7054	13	0.76	6	0.53	15	0.79	13	0.8
mmu-miR-7054-3p	mmu-mir-7054	1	0.06	2	0.18	0	0	1	0.06
mmu-miR-7055-5p	mmu-mir-7055	0	0	0	0	0	0	0	0
mmu-miR-7055-3p	mmu-mir-7055	0	0	0	0	0	0	0	0
mmu-miR-7056-5p	mmu-mir-7056	0	0	0	0	0	0	0	0
mmu-miR-7056-3p	mmu-mir-7056	0	0	0	0	0	0	0	0
mmu-miR-7057-5p	mmu-mir-7057	0	0	0	0	2	0.1	0	0
mmu-miR-7057-3p	mmu-mir-7057	2	0.12	1	0.09	6	0.31	0	0
mmu-miR-7058-5p	mmu-mir-7058	0	0	0	0	0	0	1	0.06
mmu-miR-7058-3p	mmu-mir-7058	0	0	0	0	0	0	0	0
mmu-miR-7059-5p	mmu-mir-7059	185	10.84	128	11.22	202	10.58	185	11.42
mmu-miR-7059-3p	mmu-mir-7059	4	0.23	4	0.35	6	0.31	5	0.31
mmu-miR-706	mmu-mir-706	0	0	0	0	0	0	0	0
mmu-miR-7060-5p	mmu-mir-7060	0	0	0	0	0	0	0	0
mmu-miR-7060-3p	mmu-mir-7060	0	0	0	0	0	0	0	0
mmu-miR-7061-5p	mmu-mir-7061	5	0.29	8	0.7	8	0.42	7	0.43
mmu-miR-7061-3p	mmu-mir-7061	0	0	0	0	0	0	0	0
mmu-miR-7062-5p	mmu-mir-7062	85	4.98	94	8.24	81	4.24	74	4.57
mmu-miR-7062-3p	mmu-mir-7062	6	0.35	9	0.79	5	0.26	6	0.37
mmu-miR-7063-5p	mmu-mir-7063	24	1.41	10	0.88	28	1.47	13	0.8
mmu-miR-7063-3p	mmu-mir-7063	2	0.12	0	0	1	0.05	0	0
mmu-miR-7064-5p	mmu-mir-7064	1	0.06	0	0	0	0	0	0
mmu-miR-7064-3p	mmu-mir-7064	0	0	0	0	0	0	0	0
mmu-miR-7065-5p	mmu-mir-7065	1	0.06	2	0.18	0	0	0	0
mmu-miR-7065-3p	mmu-mir-7065	1	0.06	0	0	0	0	1	0.06
mmu-miR-7066-5p	mmu-mir-7066	0	0	0	0	0	0	0	0
mmu-miR-7066-3p	mmu-mir-7066	0	0	0	0	0	0	0	0
mmu-miR-7067-5p	mmu-mir-7067	0	0	1	0.09	0	0	0	0
mmu-miR-7067-3p	mmu-mir-7067	1	0.06	4	0.35	1	0.05	3	0.19
mmu-miR-7068-5p	mmu-mir-7068	0	0	0	0	0	0	0	0
mmu-miR-7068-3p	mmu-mir-7068	9	0.53	4	0.35	6	0.31	8	0.49
mmu-miR-7069-5p	mmu-mir-7069	3	0.18	1	0.09	3	0.16	2	0.12
mmu-miR-7069-3p	mmu-mir-7069	1	0.06	1	0.09	1	0.05	3	0.19
mmu-miR-707	mmu-mir-707	0	0	0	0	0	0	0	0
mmu-miR-7070-5p	mmu-mir-7070	7	0.41	1	0.09	3	0.16	1	0.06
mmu-miR-7070-3p	mmu-mir-7070	1	0.06	0	0	4	0.21	6	0.37
mmu-miR-7071-5p	mmu-mir-7071	1	0.06	4	0.35	2	0.1	1	0.06
mmu-miR-7071-3p	mmu-mir-7071	0	0	0	0	0	0	0	0
mmu-miR-7072-5p	mmu-mir-7072	1	0.06	1	0.09	0	0	2	0.12
mmu-miR-7072-3p	mmu-mir-7072	0	0	0	0	1	0.05	0	0
mmu-miR-7073-5p	mmu-mir-7073	4	0.23	7	0.61	6	0.31	5	0.31
mmu-miR-7073-3p	mmu-mir-7073	0	0	0	0	0	0	0	0
mmu-miR-7074-5p	mmu-mir-7074	0	0	0	0	0	0	0	0
mmu-miR-7074-3p	mmu-mir-7074	5	0.29	0	0	7	0.37	2	0.12
mmu-miR-7075-5p	mmu-mir-7075	1	0.06	0	0	0	0	0	0
mmu-miR-7075-3p	mmu-mir-7075	3	0.18	3	0.26	0	0	3	0.19
mmu-miR-7076-5p	mmu-mir-7076	0	0	0	0	0	0	0	0
mmu-miR-7076-3p	mmu-mir-7076	0	0	0	0	0	0	0	0
mmu-miR-7077-5p	mmu-mir-7077	0	0	0	0	0	0	1	0.06
mmu-miR-7077-3p	mmu-mir-7077	0	0	0	0	1	0.05	0	0
mmu-miR-7078-5p	mmu-mir-7078	1	0.06	0	0	0	0	0	0
mmu-miR-7078-3p	mmu-mir-7078	0	0	0	0	0	0	0	0
mmu-miR-7079-5p	mmu-mir-7079	0	0	0	0	0	0	0	0
mmu-miR-7079-3p	mmu-mir-7079	9	0.53	14	1.23	10	0.52	14	0.86
mmu-miR-708-5p	mmu-mir-708	4	0.23	2	0.18	7	0.37	2	0.12
mmu-miR-708-3p	mmu-mir-708	1	0.06	1	0.09	0	0	2	0.12
mmu-miR-7080-5p	mmu-mir-7080	0	0	0	0	0	0	0	0
mmu-miR-7080-3p	mmu-mir-7080	0	0	0	0	0	0	0	0
mmu-miR-7081-5p	mmu-mir-7081	0	0	0	0	0	0	0	0
mmu-miR-7081-3p	mmu-mir-7081	16	0.94	7	0.61	6	0.31	17	1.05
mmu-miR-7082-5p	mmu-mir-7082	0	0	0	0	0	0	0	0
mmu-miR-7082-3p	mmu-mir-7082	3	0.18	3	0.26	2	0.1	0	0
mmu-miR-7083-5p	mmu-mir-7083	4	0.23	5	0.44	5	0.26	5	0.31
mmu-miR-7083-3p	mmu-mir-7083	0	0	0	0	0	0	0	0
mmu-miR-7084-5p	mmu-mir-7084	4	0.23	2	0.18	3	0.16	5	0.31
mmu-miR-7084-3p	mmu-mir-7084	0	0	1	0.09	0	0	0	0
mmu-miR-7085-5p	mmu-mir-7085	2	0.12	3	0.26	1	0.05	0	0
mmu-miR-7085-3p	mmu-mir-7085	3	0.18	0	0	0	0	2	0.12
mmu-miR-7086-5p	mmu-mir-7086	2	0.12	1	0.09	5	0.26	1	0.06
mmu-miR-7086-3p	mmu-mir-7086	9	0.53	3	0.26	0	0	7	0.43
mmu-miR-7087-5p	mmu-mir-7087	0	0	1	0.09	5	0.26	0	0
mmu-miR-7087-3p	mmu-mir-7087	0	0	0	0	0	0	0	0
mmu-miR-7088-5p	mmu-mir-7088	0	0	0	0	0	0	0	0
mmu-miR-7088-3p	mmu-mir-7088	0	0	2	0.18	0	0	2	0.12
mmu-miR-7089-5p	mmu-mir-7089	0	0	0	0	1	0.05	2	0.12
mmu-miR-7089-3p	mmu-mir-7089	4	0.23	0	0	3	0.16	0	0
mmu-miR-709	mmu-mir-709	2	0.12	3.5	0.31	5	0.26	3.5	0.22
mmu-miR-7090-5p	mmu-mir-7090	1	0.06	1	0.09	0	0	4	0.25
mmu-miR-7090-3p	mmu-mir-7090	0	0	1	0.09	3	0.16	1	0.06
mmu-miR-7091-5p	mmu-mir-7091	340	19.91	291	25.5	339	17.76	278	17.17
mmu-miR-7091-3p	mmu-mir-7091	64	3.75	45	3.94	73	3.82	95	5.87
mmu-miR-7092-5p	mmu-mir-7092	6	0.35	11	0.96	13	0.68	6	0.37
mmu-miR-7092-3p	mmu-mir-7092	1	0.06	0	0	0	0	1	0.06
mmu-miR-7093-5p	mmu-mir-7093	0	0	0	0	0	0	0	0
mmu-miR-7093-3p	mmu-mir-7093	6	0.35	4	0.35	3	0.16	7	0.43
mmu-miR-7094-1-5p	mmu-mir-7094-1	0	0	0	0	0	0	0	0
mmu-miR-7094-3p	mmu-mir-7094-1	0	0	0	0	0	0	0	0
mmu-miR-7094-3p	mmu-mir-7094-2	0	0	0	0	0	0	0	0
mmu-miR-7094b-2-5p	mmu-mir-7094-2	0	0	0	0	0	0	0	0
mmu-miR-710	mmu-mir-710	0	0	0	0	0	0	0	0
mmu-miR-711	mmu-mir-711	0	0	0	0	0	0	0	0
mmu-miR-7115-5p	mmu-mir-7115	91	5.33	96	8.41	150	7.86	117	7.22
mmu-miR-7115-3p	mmu-mir-7115	0	0	1	0.09	1	0.05	0	0
mmu-miR-7116-5p	mmu-mir-7116	0	0	0	0	0	0	0	0
mmu-miR-7116-3p	mmu-mir-7116	1	0.06	1	0.09	0	0	1	0.06
mmu-miR-7117-5p	mmu-mir-7117	2	0.12	0	0	2	0.1	1	0.06
mmu-miR-7117-3p	mmu-mir-7117	0	0	0	0	0	0	0	0
mmu-miR-7118-5p	mmu-mir-7118	2	0.12	2	0.18	1	0.05	0	0
mmu-miR-7118-3p	mmu-mir-7118	41	2.4	27	2.37	30	1.57	22	1.36
mmu-miR-7119-5p	mmu-mir-7119	0	0	0	0	0	0	0	0
mmu-miR-7119-3p	mmu-mir-7119	0	0	0	0	0	0	0	0
mmu-miR-712-5p	mmu-mir-712	3	0.18	2	0.18	1	0.05	2	0.12
mmu-miR-712-3p	mmu-mir-712	2	0.12	1	0.09	0	0	0	0
mmu-miR-713	mmu-mir-713	0	0	0	0	0	0	0	0
mmu-miR-714	mmu-mir-714	0	0	0	0	0	0	0	0
mmu-miR-717	mmu-mir-717	0	0	0	0	0	0	0	0
mmu-miR-718	mmu-mir-718	0	0	0	0	0	0	0	0
mmu-miR-719	mmu-mir-719	0	0	0	0	0	0	0	0
mmu-miR-721	mmu-mir-721	0	0	0	0	0	0	0	0
mmu-miR-7210-5p	mmu-mir-7210	0	0	0	0	0	0	0	0
mmu-miR-7210-3p	mmu-mir-7210	0	0	0	0	0	0	0	0
mmu-miR-7211-5p	mmu-mir-7211	4	0.23	4	0.35	3	0.16	1	0.06
mmu-miR-7211-3p	mmu-mir-7211	3	0.18	0	0	3	0.16	3	0.19
mmu-miR-7212-5p	mmu-mir-7212	5	0.29	1	0.09	3	0.16	6	0.37
mmu-miR-7212-3p	mmu-mir-7212	0	0	0	0	0	0	0	0
mmu-miR-7213-5p	mmu-mir-7213	0	0	0	0	7	0.37	0	0
mmu-miR-7213-3p	mmu-mir-7213	0	0	0	0	0	0	0	0
mmu-miR-7214-5p	mmu-mir-7214	0	0	0	0	0	0	0	0
mmu-miR-7214-3p	mmu-mir-7214	0	0	0	0	0	0	0	0
mmu-miR-7215-5p	mmu-mir-7215	0	0	0	0	0	0	0	0
mmu-miR-7215-3p	mmu-mir-7215	0	0	0	0	0	0	0	0
mmu-miR-7216-5p	mmu-mir-7216	0	0	0	0	0	0	0	0
mmu-miR-7216-3p	mmu-mir-7216	0	0	0	0	0	0	0	0
mmu-miR-7217-5p	mmu-mir-7217	0	0	0	0	0	0	0	0
mmu-miR-7217-3p	mmu-mir-7217	0	0	0	0	0	0	0	0
mmu-miR-7218-5p	mmu-mir-7218	0	0	0	0	0	0	0	0
mmu-miR-7218-3p	mmu-mir-7218	0	0	0	0	0	0	0	0
mmu-miR-7219-5p	mmu-mir-7219	5	0.29	3	0.26	5	0.26	1	0.06
mmu-miR-7219-3p	mmu-mir-7219	13	0.76	19	1.67	26	1.36	32	1.98
mmu-miR-7220-5p	mmu-mir-7220	0	0	0	0	0	0	0	0
mmu-miR-7220-3p	mmu-mir-7220	0	0	0	0	0	0	0	0
mmu-miR-7221-5p	mmu-mir-7221	0	0	0	0	0	0	0	0
mmu-miR-7221-3p	mmu-mir-7221	0	0	0	0	0	0	0	0
mmu-miR-7222-5p	mmu-mir-7222	1	0.06	0	0	0	0	0	0
mmu-miR-7222-3p	mmu-mir-7222	0	0	0	0	0	0	0	0
mmu-miR-7223-5p	mmu-mir-7223	0	0	0	0	0	0	0	0
mmu-miR-7223-3p	mmu-mir-7223	0	0	0	0	0	0	0	0
mmu-miR-7224-5p	mmu-mir-7224	0	0	0	0	0	0	0	0
mmu-miR-7224-3p	mmu-mir-7224	0	0	0	0	0	0	0	0
mmu-miR-7225-5p	mmu-mir-7225	0	0	0	0	0	0	0	0
mmu-miR-7225-3p	mmu-mir-7225	0	0	0	0	0	0	0	0
mmu-miR-7226-5p	mmu-mir-7226	0	0	0	0	0	0	0	0
mmu-miR-7226-3p	mmu-mir-7226	0	0	0	0	0	0	0	0
mmu-miR-7227-5p	mmu-mir-7227	0	0	0	0	0	0	0	0
mmu-miR-7227-3p	mmu-mir-7227	3	0.18	1	0.09	3	0.16	1	0.06
mmu-miR-7228-5p	mmu-mir-7228	0	0	0	0	0	0	0	0
mmu-miR-7228-3p	mmu-mir-7228	0	0	0	0	0	0	0	0
mmu-miR-7229-5p	mmu-mir-7229	0	0	0	0	0	0	0	0
mmu-miR-7229-3p	mmu-mir-7229	0	0	0	0	0	0	0	0
mmu-miR-7230-5p	mmu-mir-7230	0	0	0	0	0	0	0	0
mmu-miR-7230-3p	mmu-mir-7230	0	0	0	0	0	0	0	0
mmu-miR-7231-5p	mmu-mir-7231	4	0.23	4	0.35	4	0.21	5	0.31
mmu-miR-7231-3p	mmu-mir-7231	0	0	0	0	0	0	0	0
mmu-miR-7232-5p	mmu-mir-7232	0	0	0	0	0	0	0	0
mmu-miR-7232-3p	mmu-mir-7232	0	0	0	0	0	0	0	0
mmu-miR-7233-5p	mmu-mir-7233	0	0	0	0	0	0	0	0
mmu-miR-7233-3p	mmu-mir-7233	0	0	0	0	0	0	0	0
mmu-miR-7234-5p	mmu-mir-7234	0	0	0	0	0	0	0	0
mmu-miR-7234-3p	mmu-mir-7234	0	0	0	0	0	0	0	0
mmu-miR-7235-5p	mmu-mir-7235	0	0	0	0	0	0	0	0
mmu-miR-7235-3p	mmu-mir-7235	0	0	1	0.09	4	0.21	6	0.37
mmu-miR-7236-5p	mmu-mir-7236	0	0	0	0	1	0.05	0	0
mmu-miR-7236-3p	mmu-mir-7236	2	0.12	2	0.18	2	0.1	1	0.06
mmu-miR-7237-5p	mmu-mir-7237	0	0	0	0	2	0.1	2	0.12
mmu-miR-7237-3p	mmu-mir-7237	6	0.35	0	0	4	0.21	3	0.19
mmu-miR-7238-5p	mmu-mir-7238	0	0	0	0	0	0	0	0
mmu-miR-7238-3p	mmu-mir-7238	0	0	0	0	0	0	0	0
mmu-miR-7239-5p	mmu-mir-7239	0	0	0	0	0	0	0	0
mmu-miR-7239-3p	mmu-mir-7239	0	0	0	0	0	0	0	0
mmu-miR-7240-5p	mmu-mir-7240	4	0.23	0	0	0	0	0	0
mmu-miR-7240-3p	mmu-mir-7240	0	0	0	0	0	0	0	0
mmu-miR-7241-5p	mmu-mir-7241	0	0	0	0	0	0	0	0
mmu-miR-7241-3p	mmu-mir-7241	0	0	0	0	0	0	0	0
mmu-miR-7242-5p	mmu-mir-7242	0	0	0	0	0	0	0	0
mmu-miR-7242-3p	mmu-mir-7242	0	0	0	0	0	0	0	0
mmu-miR-7243-5p	mmu-mir-7243	0	0	0	0	0	0	0	0
mmu-miR-7243-3p	mmu-mir-7243	0	0	0	0	0	0	0	0
mmu-miR-741-5p	mmu-mir-741	0	0	0	0	0	0	0	0
mmu-miR-741-3p	mmu-mir-741	0	0	0	0	0	0	0	0
mmu-miR-742-5p	mmu-mir-742	0	0	0	0	0	0	0	0
mmu-miR-742-3p	mmu-mir-742	0	0	0	0	0	0	0	0
mmu-miR-743a-5p	mmu-mir-743a	0	0	0	0	0	0	0	0
mmu-miR-743a-3p	mmu-mir-743a	0	0	0	0	0	0	0	0
mmu-miR-743b-5p	mmu-mir-743b	0	0	0	0	0	0	0	0
mmu-miR-743b-3p	mmu-mir-743b	0	0	0	0	0	0	0	0
mmu-miR-744-5p	mmu-mir-744	27954	1637.28	20316	1780.4	31909	1671.71	27475	1696.55
mmu-miR-744-3p	mmu-mir-744	87	5.1	35	3.07	72	3.77	58	3.58
mmu-miR-7578	mmu-mir-7578	0	0	0	0	0	0	0	0
mmu-miR-758-5p	mmu-mir-758	0	0	0	0	0	0	0	0
mmu-miR-758-3p	mmu-mir-758	0	0	0	0	0	0	0	0
mmu-miR-759	mmu-mir-759	0	0	0	0	0	0	0	0
mmu-miR-760-5p	mmu-mir-760	0	0	1	0.09	0	0	0	0
mmu-miR-760-3p	mmu-mir-760	137	8.02	132	11.57	148	7.75	126	7.78
mmu-miR-761	mmu-mir-761	0	0	0	0	0	0	0	0
mmu-miR-762	mmu-mir-762	0	0	0	0	0	0	0	0
mmu-miR-763	mmu-mir-763	0	0	0	0	0	0	0	0
mmu-miR-764-5p	mmu-mir-764	0	0	0	0	0	0	0	0
mmu-miR-764-3p	mmu-mir-764	0	0	0	0	0	0	0	0
mmu-miR-7646-5p	mmu-mir-7646	1	0.06	3	0.26	4	0.21	2	0.12
mmu-miR-7646-3p	mmu-mir-7646	0	0	1	0.09	3	0.16	0	0
mmu-miR-7647-5p	mmu-mir-7647	2	0.12	1	0.09	1	0.05	1	0.06
mmu-miR-7647-3p	mmu-mir-7647	0	0	1	0.09	0	0	5	0.31
mmu-miR-7648-5p	mmu-mir-7648	1	0.06	0	0	0	0	1	0.06
mmu-miR-7648-3p	mmu-mir-7648	5	0.29	4	0.35	10	0.52	7	0.43
mmu-miR-7649-5p	mmu-mir-7649	2	0.12	0	0	1	0.05	0	0
mmu-miR-7649-3p	mmu-mir-7649	3	0.18	2	0.18	0	0	3	0.19
mmu-miR-7650-5p	mmu-mir-7650	17	1	7	0.61	24	1.26	13	0.8
mmu-miR-7650-3p	mmu-mir-7650	0	0	0	0	0	0	0	0
mmu-miR-7651-5p	mmu-mir-7651	18	1.05	11	0.96	19	1	18	1.11
mmu-miR-7651-3p	mmu-mir-7651	0	0	0	0	0	0	0	0
mmu-miR-7652-5p	mmu-mir-7652	6	0.35	7	0.61	5	0.26	2	0.12
mmu-miR-7652-3p	mmu-mir-7652	15	0.88	9	0.79	18	0.94	6	0.37
mmu-miR-7653-5p	mmu-mir-7653	2	0.12	1	0.09	1	0.05	3	0.19
mmu-miR-7653-3p	mmu-mir-7653	0	0	0	0	0	0	0	0
mmu-miR-7654-5p	mmu-mir-7654	1	0.06	0	0	0	0	0	0
mmu-miR-7654-3p	mmu-mir-7654	0	0	0	0	0	0	1	0.06
mmu-miR-7655-5p	mmu-mir-7655	7	0.41	6	0.53	8	0.42	2	0.12
mmu-miR-7655-3p	mmu-mir-7655	0	0	0	0	2	0.1	0	0
mmu-miR-7656-5p	mmu-mir-7656	33	1.93	14	1.23	28	1.47	31	1.91
mmu-miR-7656-3p	mmu-mir-7656	3	0.18	4	0.35	0	0	5	0.31
mmu-miR-7657-5p	mmu-mir-7657	6	0.35	1	0.09	6	0.31	5	0.31
mmu-miR-7657-3p	mmu-mir-7657	0	0	0	0	0	0	0	0
mmu-miR-7658-5p	mmu-mir-7658	12	0.7	19	1.67	10	0.52	11	0.68
mmu-miR-7658-3p	mmu-mir-7658	0	0	0	0	0	0	0	0
mmu-miR-7659-5p	mmu-mir-7659	6	0.35	2	0.18	7	0.37	3	0.19
mmu-miR-7659-3p	mmu-mir-7659	0	0	0	0	0	0	0	0
mmu-miR-7660-5p	mmu-mir-7660	0	0	0	0	0	0	0	0
mmu-miR-7660-3p	mmu-mir-7660	0	0	0	0	0	0	0	0
mmu-miR-7661-5p	mmu-mir-7661	0	0	0	0	0	0	0	0
mmu-miR-7661-3p	mmu-mir-7661	6	0.35	3	0.26	8	0.42	2	0.12
mmu-miR-7662-5p	mmu-mir-7662	0	0	0	0	0	0	0	0
mmu-miR-7662-3p	mmu-mir-7662	0	0	0	0	0	0	0	0
mmu-miR-7663-5p	mmu-mir-7663	0	0	0	0	0	0	0	0
mmu-miR-7663-3p	mmu-mir-7663	17	1	30	2.63	40	2.1	24	1.48
mmu-miR-7664-5p	mmu-mir-7664	0	0	0	0	0	0	1	0.06
mmu-miR-7664-3p	mmu-mir-7664	6	0.35	1	0.09	3	0.16	2	0.12
mmu-miR-7665-5p	mmu-mir-7665	0	0	1	0.09	0	0	0	0
mmu-miR-7665-3p	mmu-mir-7665	0	0	0	0	0	0	0	0
mmu-miR-7666-5p	mmu-mir-7666	0	0	0	0	0	0	0	0
mmu-miR-7666-3p	mmu-mir-7666	3	0.18	2	0.18	1	0.05	7	0.43
mmu-miR-7667-5p	mmu-mir-7667	11	0.64	15	1.31	20	1.05	16.5	1.02
mmu-miR-7667-3p	mmu-mir-7667	5	0.29	5	0.44	4	0.21	9	0.56
mmu-miR-7668-5p	mmu-mir-7668	0	0	3	0.26	7	0.37	3	0.19
mmu-miR-7668-3p	mmu-mir-7668	1	0.06	1	0.09	1	0.05	2	0.12
mmu-miR-7669-5p	mmu-mir-7669	22	1.29	15	1.31	6	0.31	10	0.62
mmu-miR-7669-3p	mmu-mir-7669	5	0.29	8	0.7	1	0.05	2	0.12
mmu-miR-767	mmu-mir-767	0	0	0	0	0	0	0	0
mmu-miR-7670-5p	mmu-mir-7670	0	0	0	0	0	0	0	0
mmu-miR-7670-3p	mmu-mir-7670	9	0.53	5	0.44	4	0.21	10	0.62
mmu-miR-7671-5p	mmu-mir-7671	1	0.06	2	0.18	5	0.26	6	0.37
mmu-miR-7671-3p	mmu-mir-7671	5	0.29	2	0.18	4	0.21	6	0.37
mmu-miR-7672-5p	mmu-mir-7672	3	0.18	2	0.18	1	0.05	1	0.06
mmu-miR-7672-3p	mmu-mir-7672	10	0.59	4	0.35	11	0.58	5	0.31
mmu-miR-7673-5p	mmu-mir-7673	0	0	1	0.09	0	0	1	0.06
mmu-miR-7673-3p	mmu-mir-7673	0	0	0	0	0	0	0	0
mmu-miR-7674-5p	mmu-mir-7674	2	0.12	1	0.09	4	0.21	3	0.19
mmu-miR-7674-3p	mmu-mir-7674	0	0	0	0	0	0	0	0
mmu-miR-7675-5p	mmu-mir-7675	9	0.53	3	0.26	7	0.37	4	0.25
mmu-miR-7675-3p	mmu-mir-7675	4	0.23	2	0.18	7	0.37	2	0.12
mmu-miR-7676-5p	mmu-mir-7676-1	2.5	0.15	1.5	0.13	2.5	0.13	1.5	0.09
mmu-miR-7676-3p	mmu-mir-7676-1	131	7.67	103	9.03	182.5	9.56	103.5	6.39
mmu-miR-7676-5p	mmu-mir-7676-2	2.5	0.15	1.5	0.13	2.5	0.13	1.5	0.09
mmu-miR-7676-3p	mmu-mir-7676-2	131	7.67	103	9.03	182.5	9.56	103.5	6.39
[truncated: 131 more rows]
