# Supplementary material for: MiR-146a wild-type 3′ sequence identity is dispensable for proper innate immune function in vivo
Source: Life Sci Alliance. 2019 Feb 18;2(1):e201800249. doi: 10.26508/lsa.201800249 (PMC6379685; doi:10.26508/lsa.201800249)
Supplement: Supplementary file 2 [file LSA-2018-00249_TableS2.xlsx]

## Sheet: Data
Supplementary Table S2: Raw RNAseq count reads mapping to indicated mRNAs in BMDM stimulation profiling (Figure 4A). WT = wild-type. KO = miR-146a null. 3F = miR-146a "3'Flip" mutant. n# = unstimulated sample number x, t# = stimulated sample x.
GeneID	GeneSymbol	Length	WT_t1	WT_t2	WT_t3	WT_n1	WT_n2	WT_n3	KO_t1	KO_t2	KO_t3	KO_n1	KO_n2	KO_n3	3F_t1	3F_t2	3F_t3	3F_n1	3F_n2	3F_n3
ENSMUSG00000000001	Gnai3	3262	3759	4078	3598	3997	3071	2343	3886	3635	3715	3514	2995	2117	3659	5101	1991	4378	4450	1051
ENSMUSG00000000003	Pbsn	902	0	1	0	0	0	0	0	0	0	0	0	0	0	1	0	0	0	0
ENSMUSG00000000028	Cdc45	2252	93	142	146	264	191	167	53	37	39	149	122	100	89	109	90	217	210	79
ENSMUSG00000000037	Scml2	6039	1	3	0	1	1	0	0	0	1	1	2	2	1	3	0	1	2	6
ENSMUSG00000000049	Apoh	1594	1	0	0	0	0	0	0	0	0	0	0	0	0	0	0	0	0	0
ENSMUSG00000000056	Narf	4395	1114	1027	917	604	464	345	1179	1153	1183	698	549	507	973	1459	596	643	625	175
ENSMUSG00000000058	Cav2	3335	2380	2814	2115	3301	2647	2288	1836	1491	1698	3427	3015	1288	2253	2957	1100	3893	3932	984
ENSMUSG00000000078	Klf6	4225	7662	7087	7589	7223	6136	4685	7547	6971	6434	7802	6237	3574	7806	9897	3357	9776	9229	1760
ENSMUSG00000000085	Scmh1	3579	67	53	44	58	90	80	47	35	44	106	82	31	60	65	29	125	115	22
ENSMUSG00000000088	Cox5a	645	1509	1672	1552	1377	1147	904	1657	1538	1657	1323	1014	901	1339	1794	812	1398	1362	377
ENSMUSG00000000093	Tbx2	3626	1	0	3	0	0	0	1	3	0	2	1	0	1	9	0	1	1	0
ENSMUSG00000000094	Tbx4	3401	0	1	0	0	0	0	1	0	0	0	0	0	0	1	0	0	0	5
ENSMUSG00000000103	Zfy2	3107	0	0	0	0	0	0	0	0	0	0	0	0	0	0	0	0	0	0
ENSMUSG00000000120	Ngfr	3446	0	0	0	0	0	0	0	0	0	1	0	0	2	1	0	0	0	1
ENSMUSG00000000125	Wnt3	3076	0	0	0	0	0	1	0	0	0	1	0	0	0	0	0	0	0	4
ENSMUSG00000000126	Wnt9a	3329	5	4	3	4	6	0	1	0	2	5	4	1	1	3	0	3	8	2
ENSMUSG00000000127	Fer	3473	709	726	665	695	516	424	834	699	787	749	650	324	725	847	339	701	680	196
ENSMUSG00000000131	Xpo6	4552	1234	1120	1143	846	1038	761	1203	1263	1113	1180	971	749	1225	1747	633	1303	1214	163
ENSMUSG00000000134	Tfe3	3636	1230	1084	968	795	948	736	1225	1378	1172	1518	1119	595	1194	1603	650	1272	1162	157
ENSMUSG00000000142	Axin2	5033	0	0	0	1	1	0	0	0	0	1	0	1	0	0	0	0	0	0
ENSMUSG00000000148	Brat1	4068	235	207	200	196	226	173	214	207	248	267	181	156	228	277	145	293	278	45
ENSMUSG00000000149	Gna12	3416	1589	1645	1373	2660	3118	2067	1593	1542	1502	4059	3091	1219	1415	1994	849	3349	3492	475
ENSMUSG00000000154	Slc22a18	1663	19	14	5	33	28	12	10	6	14	18	17	9	12	11	6	30	27	2
ENSMUSG00000000157	Itgb2l	2901	1	1	0	2	0	0	0	2	3	0	4	0	1	4	0	2	1	0
ENSMUSG00000000159	Igsf5	2406	0	0	0	0	0	0	0	0	0	0	0	0	2	0	0	0	0	4
ENSMUSG00000000167	Pih1d2	1885	6	10	8	9	4	5	3	2	6	8	7	5	8	4	1	5	9	1
ENSMUSG00000000168	Dlat	4035	811	870	760	731	723	522	792	788	713	862	662	475	689	1001	485	927	847	166
ENSMUSG00000000171	Sdhd	1231	1834	1996	1919	2566	1510	1214	2323	2062	2276	1940	1542	1149	1865	2292	1061	2203	2150	849
ENSMUSG00000000182	Fgf23	1814	0	0	0	0	0	0	0	0	0	0	0	0	0	0	0	0	0	2
ENSMUSG00000000183	Fgf6	4657	1	0	1	0	0	2	2	0	0	0	0	0	0	0	0	1	1	6
ENSMUSG00000000184	Ccnd2	6743	27	16	62	7	11	10	50	55	58	11	8	60	36	56	15	7	13	7
ENSMUSG00000000194	Gpr107	6134	2173	1953	2096	1501	1259	925	2234	2188	2187	1767	1509	1103	1979	3019	1114	1914	1739	362
ENSMUSG00000000197	Nalcn	7115	0	0	0	0	0	0	1	0	0	0	0	0	0	2	0	0	1	2
ENSMUSG00000000202	Btbd17	1717	0	1	1	2	1	2	1	0	0	0	0	0	0	0	0	2	2	0
ENSMUSG00000000204	Slfn4	3964	340	146	1344	20	10	8	742	604	895	38	18	881	698	514	211	25	9	5
ENSMUSG00000000214	Th	2364	0	0	1	0	0	0	1	0	0	1	0	0	0	0	0	1	0	1
ENSMUSG00000000215	Ins2	1312	0	0	0	0	0	0	0	0	1	0	0	0	0	0	0	0	0	0
ENSMUSG00000000216	Scnn1g	2991	0	0	1	0	0	0	0	0	0	0	0	0	0	0	1	0	0	1
ENSMUSG00000000223	Drp2	7437	2	2	2	0	3	1	0	2	0	0	0	1	1	0	0	4	1	1
ENSMUSG00000000244	Tspan32	2006	95	83	83	165	83	63	93	125	177	98	135	84	66	94	54	123	102	55
ENSMUSG00000000247	Lhx2	3486	7	4	27	0	2	1	1	0	3	3	1	1	10	4	5	2	4	0
ENSMUSG00000000248	Clec2g	2664	2	1	1	0	0	0	1	2	2	0	1	1	1	0	0	1	0	6
ENSMUSG00000000253	Gmpr	1655	123	173	181	225	173	178	69	144	143	143	161	119	116	104	61	229	211	63
ENSMUSG00000000263	Glra1	2414	0	0	0	0	1	0	1	0	0	0	0	0	0	0	0	0	0	0
ENSMUSG00000000266	Mid2	6411	1	0	1	0	3	1	0	0	0	2	3	0	0	2	0	2	0	4
ENSMUSG00000000275	Trim25	5754	2448	2275	2970	1635	1606	1358	2729	2670	2581	1909	1527	2161	2352	3145	1233	2127	1860	380
ENSMUSG00000000276	Dgke	8347	346	403	348	425	385	284	409	312	373	381	389	217	384	497	195	467	480	105
ENSMUSG00000000278	Scpep1	2097	5943	5382	5707	6162	5646	3956	4314	4414	5345	5266	3977	3103	5446	7055	2750	6442	6945	1376
ENSMUSG00000000282	Mnt	4590	188	201	144	208	236	210	170	128	160	272	250	123	200	255	107	266	246	54
ENSMUSG00000000290	Itgb2	2970	17026	17261	15994	12703	12499	9845	15067	17247	16005	14565	13149	10273	16613	23757	9993	18425	17379	2764
ENSMUSG00000000295	Hddc2	858	81	121	100	140	103	69	85	113	95	94	87	64	91	137	67	139	122	42
ENSMUSG00000000296	Tpd52l1	1323	0	0	0	0	0	0	0	0	0	0	0	0	0	0	0	0	0	2
ENSMUSG00000000301	Pemt	1218	15	15	25	16	16	17	17	8	14	19	13	24	16	37	16	24	22	5
ENSMUSG00000000303	Cdh1	4430	2	3	2	2	2	5	4	2	6	3	5	17	5	3	2	9	4	9
ENSMUSG00000000305	Cdh4	6797	0	0	1	0	0	2	0	0	4	0	0	0	0	0	0	0	2	1
ENSMUSG00000000308	Ckmt1	1948	0	0	0	0	0	0	1	0	0	0	0	0	1	0	0	0	0	7
ENSMUSG00000000317	Bcl6b	3389	0	1	0	0	2	2	0	2	1	0	0	1	0	0	0	2	1	0
ENSMUSG00000000318	Clec10a	2565	36	41	59	135	110	66	20	31	36	188	175	91	38	44	15	103	112	43
ENSMUSG00000000320	Alox12	4085	1	2	2	0	0	0	1	1	2	0	0	0	4	4	1	5	0	8
ENSMUSG00000000325	Arvcf	5401	10	12	3	18	20	12	12	11	14	22	12	10	13	9	8	29	10	6
ENSMUSG00000000326	Comt	2532	590	641	572	1109	910	674	680	609	646	1045	795	394	583	848	381	1156	1243	315
ENSMUSG00000000339	Rtca	1609	512	582	506	424	406	264	520	515	468	367	286	300	529	634	293	488	512	89
ENSMUSG00000000340	Dbt	3301	412	449	470	330	324	211	527	407	490	322	214	186	408	475	217	401	334	84
ENSMUSG00000000346	Dazap2	1826	5003	4511	4512	4561	4409	2994	5298	5591	4786	5536	4432	3168	4719	6450	2453	5543	5336	850
ENSMUSG00000000355	Mcts1	783	432	409	401	466	339	294	430	458	391	445	406	274	393	556	215	495	537	224
ENSMUSG00000000359	Rem1	1663	0	0	2	1	0	0	0	0	1	0	0	0	0	0	0	0	0	0
ENSMUSG00000000365	Rnf17	5504	19	18	19	24	9	7	26	7	21	24	2	22	18	27	12	38	18	20
ENSMUSG00000000374	Trappc10	5047	1896	1979	1703	1944	1751	1290	2051	2028	1850	2241	1783	1227	1804	2476	1085	2226	2150	387
ENSMUSG00000000378	Ccm2	2087	546	564	552	731	557	431	554	601	608	660	606	458	494	778	320	744	770	191
ENSMUSG00000000381	Wap	551	0	0	0	0	0	0	0	0	0	0	0	0	0	0	0	0	0	0
ENSMUSG00000000384	Tbrg4	2558	386	494	332	329	347	256	443	349	356	418	357	224	408	462	234	478	421	87
ENSMUSG00000000385	Tmprss2	3159	1	0	0	0	1	0	0	0	0	0	0	0	0	2	1	3	0	9
ENSMUSG00000000386	Mx1	3387	5741	2415	15375	31	24	88	14218	19215	13582	400	209	8216	6710	8634	2103	75	46	35
ENSMUSG00000000392	Fap	2788	10	2	9	1	1	2	19	1	11	1	3	5	5	8	0	0	0	7
ENSMUSG00000000394	Gcg	1131	0	0	1	0	0	0	0	0	0	0	0	0	1	1	1	0	0	0
ENSMUSG00000000399	Ndufa9	1513	1423	1618	1531	1732	1148	835	1423	1294	1362	1139	902	930	1393	1766	912	1601	1590	643
ENSMUSG00000000402	Egfl6	2704	0	1	0	0	0	0	0	0	0	0	0	0	0	0	0	0	0	0
ENSMUSG00000000409	Lck	2235	4	6	6	1	2	1	9	10	10	1	2	4	7	11	3	4	2	0
ENSMUSG00000000411	Tssk3	1280	0	2	0	0	0	1	0	0	1	1	1	0	0	0	0	1	1	0
ENSMUSG00000000416	Cttnbp2	5928	2	2	0	1	2	0	1	0	1	2	0	0	0	3	0	0	2	5
ENSMUSG00000000420	Galnt1	4564	1970	1839	2095	2163	1453	1235	2261	2363	2370	2253	1773	1127	1585	2567	909	2142	2264	582
ENSMUSG00000000435	Myf5	2083	0	0	0	0	0	0	1	0	0	0	0	0	0	0	0	0	0	2
ENSMUSG00000000439	Mkrn2	6230	414	468	385	415	387	285	364	348	398	373	289	228	399	544	223	462	470	88
ENSMUSG00000000440	Pparg	2560	87	92	95	428	479	324	46	36	38	430	328	108	77	110	57	644	636	94
ENSMUSG00000000441	Raf1	3406	2486	2596	2595	2260	1569	1412	3000	3448	2903	2645	2199	1675	2593	3425	1405	2201	2390	594
ENSMUSG00000000486	Sept1	1706	4	3	2	3	2	3	4	3	2	6	2	1	1	5	1	3	4	1
ENSMUSG00000000489	Pdgfb	2918	463	359	258	661	444	461	66	80	84	250	266	107	512	396	238	1255	576	109
ENSMUSG00000000530	Acvrl1	4005	1063	994	387	547	435	178	515	457	594	278	223	203	974	1222	386	699	653	109
ENSMUSG00000000531	Grasp	2013	1	2	3	4	3	2	2	3	0	2	5	2	2	1	0	5	1	0
ENSMUSG00000000532	Acvr1b	4173	1152	1077	1037	469	412	395	1413	1602	1353	695	533	356	1256	1705	627	575	582	103
ENSMUSG00000000538	Tom1l2	6311	232	236	240	250	302	243	242	230	223	331	280	169	243	301	157	370	314	54
ENSMUSG00000000544	Gpa33	2515	0	0	0	1	0	2	0	0	0	0	0	0	0	0	0	0	0	3
ENSMUSG00000000552	Zfp385a	2291	211	200	159	137	203	140	201	250	204	205	183	145	186	286	95	187	171	10
ENSMUSG00000000555	Itga5	4301	2408	2365	1974	1070	1179	1005	2009	1813	1628	1326	1132	906	2815	2992	1144	1652	1397	247
ENSMUSG00000000560	Gabra2	5852	0	0	0	0	0	0	0	0	1	0	0	0	1	0	1	0	0	3
ENSMUSG00000000561	Wdr77	3682	410	490	347	528	418	306	368	271	398	502	372	200	372	558	220	642	575	135
ENSMUSG00000000562	Adora3	2370	46	45	82	21	26	12	109	127	104	24	12	39	65	103	42	26	29	2
ENSMUSG00000000563	Atp5f1	1604	3049	3292	3343	3506	2439	1913	3018	2939	2989	2596	2056	1813	2904	3540	1663	3182	3205	1381
ENSMUSG00000000567	Sox9	4135	2	0	0	0	0	0	0	0	1	0	0	0	0	0	0	0	2	1
ENSMUSG00000000568	Hnrnpd	6811	748	905	848	719	501	530	1029	926	873	626	613	425	824	964	417	837	686	163
ENSMUSG00000000579	Dynlt1c	2589	9	6	9	11	3	9	4	6	10	8	2	6	8	7	1	8	7	4
ENSMUSG00000000581	C1d	3301	946	1037	1030	1226	739	578	1164	970	972	951	819	586	855	1208	471	1072	1125	481
ENSMUSG00000000594	Gm2a	4127	3671	3084	3443	2717	3505	2732	3508	3726	3343	4621	3720	1821	3459	5373	1912	4356	4540	669
ENSMUSG00000000600	Krit1	6189	503	450	475	526	416	325	562	516	552	686	546	272	427	696	275	617	571	153
ENSMUSG00000000605	Clcn4	4758	1329	1446	1324	2047	1451	1139	1367	1401	1258	1805	1617	724	1104	1891	668	2001	2514	525
ENSMUSG00000000606	Vmn2r88	3222	0	0	0	0	0	0	0	0	0	0	0	0	0	0	0	0	0	2
ENSMUSG00000000617	Grm6	4475	0	0	0	0	1	1	0	0	0	0	0	0	2	0	0	1	0	0
ENSMUSG00000000627	Sema4f	4086	4	0	0	0	0	0	0	0	0	1	0	0	0	0	0	0	0	0
ENSMUSG00000000628	Hk2	5969	2335	2186	1956	1417	1117	866	3042	3336	3316	2195	1672	1957	2262	3115	1281	1732	1652	313
ENSMUSG00000000631	Myo18a	10492	1127	955	1110	1358	1092	1016	1049	1094	1057	1399	1070	769	1116	1489	581	1622	1587	334
ENSMUSG00000000632	Sez6	4275	0	0	0	0	0	0	0	0	3	3	0	1	0	0	0	1	0	5
ENSMUSG00000000673	Haao	1222	0	1	2	1	2	5	1	0	2	1	2	4	3	5	0	2	1	0
ENSMUSG00000000682	Cd52	514	3770	3188	3741	1422	1855	1480	4164	3191	3541	2543	1858	2141	3525	4636	2210	2476	2335	420
ENSMUSG00000000686	Abhd15	3035	80	81	107	145	110	86	114	158	95	183	169	82	97	151	53	112	152	35
ENSMUSG00000000690	Hoxb6	1964	0	0	0	0	0	0	0	0	0	0	0	0	0	0	0	0	0	0
ENSMUSG00000000693	Loxl3	3854	72	52	82	63	31	49	74	63	99	66	42	38	77	81	33	70	79	50
ENSMUSG00000000701	Tcl1b5	1055	0	0	0	0	0	0	0	0	0	0	0	0	0	0	0	0	0	1
ENSMUSG00000000706	Btn1a1	3933	0	0	0	0	0	0	0	0	0	0	1	0	0	1	0	0	0	6
ENSMUSG00000000708	Kat2b	4707	1704	1304	1974	1007	858	630	2387	2778	2263	1241	946	919	1645	2554	789	1128	1110	231
ENSMUSG00000000711	Rab5b	3180	1720	1635	1575	1456	1405	1078	1790	1747	1768	1972	1500	991	1576	2233	801	1832	1941	314
ENSMUSG00000000724	Cryba1	778	0	0	0	0	0	1	0	0	0	0	0	0	0	0	0	0	0	0
ENSMUSG00000000730	Dnmt3l	2670	45	79	52	16	13	9	40	55	43	21	16	21	52	36	40	19	5	5
ENSMUSG00000000731	Aire	1938	0	0	0	0	0	0	4	1	0	0	0	0	0	0	1	0	0	2
ENSMUSG00000000732	Icosl	3558	210	301	201	141	192	138	394	469	361	402	277	132	284	249	112	190	153	24
ENSMUSG00000000738	Spg7	3214	591	717	649	821	711	518	681	636	658	832	674	488	678	811	363	947	839	235
ENSMUSG00000000739	Sult5a1	3820	0	1	0	1	0	0	1	0	1	0	0	0	3	0	1	0	0	1
ENSMUSG00000000740	Rpl13	579	2487	2662	2445	3330	2185	1734	2449	2670	2303	2881	2536	1524	2401	3009	1415	3314	3540	1556
ENSMUSG00000000743	Chmp1a	2140	2572	2599	2592	2869	1714	1287	2516	2815	2550	2274	1937	1621	2368	3286	1262	2656	2691	836
ENSMUSG00000000751	Rpa1	5020	877	958	912	1510	1279	997	884	773	799	1091	917	932	822	1013	517	1640	1484	428
ENSMUSG00000000753	Serpinf1	2288	3	2	3	4	4	1	2	0	0	5	1	0	0	0	1	1	2	2
ENSMUSG00000000759	Tubgcp3	3797	556	589	569	658	547	428	722	683	593	770	594	402	552	899	308	778	816	201
ENSMUSG00000000766	Oprm1	6770	1	2	0	0	0	0	2	0	0	0	0	0	0	0	0	0	0	5
ENSMUSG00000000776	Polr3d	2156	190	186	150	189	133	102	194	173	203	176	160	79	176	264	108	194	235	52
ENSMUSG00000000782	Tcf7	2625	0	0	0	0	0	1	0	0	1	0	0	0	0	0	0	0	1	0
ENSMUSG00000000787	Ddx3x	4692	7424	8473	6624	12210	8730	6663	8190	7011	7504	11858	10325	3816	6632	8801	3982	12184	12796	3150
ENSMUSG00000000791	Il12rb1	3132	7	13	26	6	9	9	16	18	36	1	3	27	22	10	7	19	5	7
ENSMUSG00000000792	Slc5a5	2928	0	0	0	0	0	0	0	0	0	0	0	0	0	0	0	1	1	0
ENSMUSG00000000794	Kcnn3	2884	0	0	1	0	0	0	1	0	1	0	0	0	0	1	0	0	0	1
ENSMUSG00000000804	Usp32	7131	619	595	650	546	530	485	854	795	818	820	595	502	605	861	348	808	725	141
ENSMUSG00000000805	Car4	1257	0	0	1	0	0	0	0	0	0	0	0	0	0	0	0	0	0	2
ENSMUSG00000000811	Txnrd3	2836	58	113	61	133	110	45	49	45	43	85	104	40	64	114	42	119	125	26
ENSMUSG00000000817	Fasl	1937	0	0	0	0	0	0	1	0	0	0	0	1	0	1	2	0	0	2
ENSMUSG00000000823	Zfp512b	3167	79	82	63	72	93	71	95	61	60	165	85	38	90	80	46	87	129	25
ENSMUSG00000000826	Dnajc5	6878	2519	2380	2238	2498	2355	1695	2408	2491	2323	3159	2709	1556	2418	3364	1242	2979	3099	599
ENSMUSG00000000827	Tpd52l2	3781	893	945	957	1262	803	660	1044	1004	944	1099	925	591	889	1231	481	1202	1204	481
ENSMUSG00000000838	Fmr1	4460	862	687	1014	847	687	501	1047	948	983	876	721	495	764	1154	407	841	836	253
ENSMUSG00000000861	Bcl11a	7601	2	4	0	1	1	2	1	0	0	2	1	1	1	5	1	5	3	2
ENSMUSG00000000869	Il4	983	0	0	0	0	0	0	0	0	0	0	0	0	0	0	0	0	0	0
ENSMUSG00000000876	Pxmp4	3114	176	210	143	208	209	125	179	178	139	215	184	119	168	236	94	210	212	39
ENSMUSG00000000881	Dlg3	5287	66	61	65	43	33	15	47	75	74	23	20	20	55	96	39	38	77	13
ENSMUSG00000000884	Gnb1l	3579	17	32	21	31	22	18	37	32	32	27	33	21	18	24	21	34	47	9
ENSMUSG00000000889	Dbh	2552	0	0	0	0	0	0	0	0	1	0	0	0	0	0	0	1	1	5
ENSMUSG00000000901	Mmp11	2494	2	2	2	1	4	1	1	6	4	3	3	1	2	1	0	5	2	0
ENSMUSG00000000902	Smarcb1	1660	503	507	429	540	415	330	526	550	457	508	387	260	497	689	310	583	566	163
ENSMUSG00000000903	Vpreb3	859	0	0	0	0	0	0	0	0	0	0	0	0	0	0	0	0	0	0
ENSMUSG00000000915	Hip1r	6653	9	26	9	3	3	4	41	28	34	2	4	4	17	15	19	2	4	4
ENSMUSG00000000916	Nsun5	2243	95	139	110	102	92	82	97	85	103	129	116	77	85	176	49	154	131	37
ENSMUSG00000000934	Top1mt	1903	59	66	58	68	63	30	56	66	87	51	43	44	52	69	41	81	57	11
ENSMUSG00000000938	Hoxa10	3142	0	0	0	0	0	1	1	0	0	0	0	0	1	3	1	1	0	4
ENSMUSG00000000942	Hoxa4	1594	0	1	0	4	2	2	2	2	1	4	2	2	1	2	3	4	1	0
ENSMUSG00000000957	Mmp14	4390	5044	4084	5648	117	76	225	8210	10067	6657	588	446	328	5132	7680	2854	220	206	35
ENSMUSG00000000958	Slc7a7	3180	477	391	495	282	207	191	522	606	522	456	361	232	419	635	263	317	345	63
ENSMUSG00000000959	Oxa1l	2538	259	299	223	226	358	227	276	206	251	396	273	177	234	330	186	302	296	47
ENSMUSG00000000976	Heatr6	5614	578	537	451	263	349	249	637	751	693	432	320	242	553	827	343	415	394	60
ENSMUSG00000000982	Ccl3	766	784	581	648	387	579	334	457	1071	695	514	382	123	816	924	308	661	632	97
ENSMUSG00000000983	Wfdc18	521	13	11	12	7	4	3	8	6	5	1	4	1	6	12	11	5	9	2
ENSMUSG00000001014	Icam4	1110	2	12	6	10	5	3	6	14	3	10	5	3	7	11	2	9	8	2
ENSMUSG00000001016	Ilf2	2027	369	500	400	640	466	376	366	320	404	409	386	278	402	490	238	630	621	215
ENSMUSG00000001017	Chtop	3637	1621	1575	1651	1653	1186	911	1778	1883	1687	1607	1257	977	1528	2161	794	1750	1823	462
ENSMUSG00000001018	Snapin	1928	948	905	884	850	953	660	884	925	972	1082	774	502	817	1340	567	1067	1125	179
ENSMUSG00000001020	S100a4	584	17107	21135	14893	28274	17763	12814	13907	11841	11405	16773	14108	14618	16729	18608	9365	23491	23488	20797
ENSMUSG00000001021	S100a3	894	1	0	2	1	0	0	0	0	0	1	0	0	0	0	1	0	0	1
ENSMUSG00000001023	S100a5	432	0	0	0	0	0	0	0	0	0	0	0	0	1	3	0	0	0	2
ENSMUSG00000001025	S100a6	809	7108	7324	6118	8435	6708	5093	5188	5274	5059	6544	5720	6288	6866	8151	3408	9082	8581	3675
ENSMUSG00000001027	Scn4a	6598	1	0	0	1	0	0	0	0	2	2	0	0	4	0	2	0	1	7
ENSMUSG00000001029	Icam2	1505	28	23	38	39	42	26	22	22	18	19	17	46	37	43	10	48	34	17
ENSMUSG00000001034	Mapk7	3383	409	356	320	338	319	252	423	354	400	414	359	187	383	494	189	384	472	80
ENSMUSG00000001036	Epn2	4708	201	267	154	187	187	151	170	166	154	202	185	51	191	317	105	270	272	63
ENSMUSG00000001039	B9d1	847	29	17	28	28	24	18	10	11	17	24	11	22	20	11	8	21	23	11
ENSMUSG00000001052	Sec24b	5254	486	552	526	410	458	425	592	570	558	610	498	246	527	716	315	606	491	109
ENSMUSG00000001053	N4bp3	2728	78	84	48	129	97	58	44	52	59	156	94	36	86	85	38	106	131	19
ENSMUSG00000001054	Rmnd5b	2015	393	455	318	506	502	308	328	261	317	597	386	310	369	462	223	635	554	98
ENSMUSG00000001056	Nhp2	1042	535	746	548	619	581	443	442	480	447	575	520	339	535	650	381	727	755	219
ENSMUSG00000001062	Vps9d1	2955	359	313	315	204	242	169	492	442	418	350	262	194	368	502	156	284	264	48
ENSMUSG00000001065	Zfp276	4071	426	424	382	341	230	160	538	551	500	392	324	264	426	632	189	352	381	107
ENSMUSG00000001076	C1ql4	874	0	0	0	0	0	0	0	0	0	0	0	0	0	0	0	0	0	0
ENSMUSG00000001082	Mfsd10	2056	298	329	205	278	279	184	306	260	214	311	262	203	259	382	159	349	315	51
ENSMUSG00000001089	Luzp1	7845	804	704	792	954	924	765	912	876	840	1210	960	647	714	887	379	1263	1152	173
ENSMUSG00000001095	Slc13a2	2412	2	2	0	0	5	0	2	3	1	5	3	2	4	1	2	0	1	0
ENSMUSG00000001098	Kctd10	3106	1615	1617	1574	1760	1373	987	1620	1822	1639	1631	1274	1022	1620	2169	816	1873	1728	468
ENSMUSG00000001100	Poldip2	2054	473	508	483	571	481	373	500	489	439	485	439	296	498	574	293	608	595	154
ENSMUSG00000001103	Sebox	1359	0	0	1	0	0	0	0	0	0	2	0	0	0	0	0	0	0	0
ENSMUSG00000001105	Ift20	1163	492	575	510	629	436	332	491	432	454	480	415	239	454	654	290	612	616	316
ENSMUSG00000001119	Col6a1	4100	2	1	7	4	2	0	2	4	2	0	0	1	1	6	2	0	2	3
ENSMUSG00000001120	Pcbp3	2550	6	15	2	13	19	14	10	11	14	42	15	12	17	21	7	14	27	5
ENSMUSG00000001123	Lgals9	1613	2499	1693	2843	276	574	355	3188	3295	3064	792	496	2478	2504	3438	1317	507	435	73
ENSMUSG00000001127	Araf	4541	743	717	714	745	617	465	758	738	726	740	670	447	665	1024	407	865	920	249
ENSMUSG00000001128	Cfp	1636	6987	6918	7378	6410	5058	4242	7887	8048	7928	6415	4960	1596	6325	9532	3987	6643	7633	2033
ENSMUSG00000001131	Timp1	888	469	140	587	13	8	12	1064	1088	786	12	11	24	405	871	204	15	27	0
ENSMUSG00000001134	Uxt	875	181	172	153	165	118	115	170	160	169	161	124	111	162	191	86	165	156	72
ENSMUSG00000001138	Cnnm3	5292	146	145	123	169	213	156	178	159	171	271	220	129	113	194	60	219	207	44
ENSMUSG00000001143	Lman2l	3908	146	144	163	212	156	170	145	136	133	247	168	130	139	179	104	195	237	41
ENSMUSG00000001150	Mcm3ap	6427	620	671	593	676	585	503	648	661	653	763	543	498	637	835	327	750	690	171
ENSMUSG00000001151	Pcnt	9395	556	557	492	767	739	634	502	459	478	894	663	465	505	634	322	908	747	166
ENSMUSG00000001155	Ftcd	1933	0	1	0	0	1	0	0	0	0	0	0	0	0	0	1	1	0	0
ENSMUSG00000001156	Mxd1	4671	613	423	1496	199	203	152	925	1173	766	369	275	494	707	925	318	206	219	36
ENSMUSG00000001157	Gmcl1	3260	320	372	414	345	279	229	328	318	375	358	252	190	315	408	198	367	369	118
ENSMUSG00000001158	Snrnp27	1435	463	491	485	381	273	247	526	461	464	320	247	268	429	516	268	416	397	142
ENSMUSG00000001166	Oas1c	2401	230	177	236	67	55	60	244	286	220	77	38	147	252	285	112	84	52	26
ENSMUSG00000001168	Oas1h	1703	0	0	0	0	0	0	1	0	0	0	0	1	1	0	0	0	0	1
ENSMUSG00000001173	Ocrl	6423	613	641	569	430	507	397	809	710	743	710	539	325	572	875	329	662	604	103
ENSMUSG00000001175	Calm1	4277	20885	25173	24473	17789	14189	11496	25832	24169	26002	15534	12558	12681	22033	27722	13380	19895	19375	6050
ENSMUSG00000001211	Agpat3	7226	948	927	951	725	542	457	1278	1136	1116	877	640	467	910	1253	502	843	777	134
ENSMUSG00000001225	Slc26a3	3054	0	0	1	0	0	0	0	0	1	0	0	0	0	0	0	0	1	0
ENSMUSG00000001227	Sema6b	3977	193	189	159	198	214	130	217	154	165	127	102	70	167	230	100	180	203	54
ENSMUSG00000001228	Uhrf1	3744	378	625	414	798	839	636	149	88	234	555	522	292	359	434	333	1114	949	294
ENSMUSG00000001229	Dpp9	3374	325	350	255	278	375	249	336	314	286	422	351	233	305	463	200	393	399	60
ENSMUSG00000001240	Ramp2	1547	0	0	0	0	0	0	0	0	0	0	0	0	0	1	0	0	0	1
ENSMUSG00000001247	Lsr	2172	14	17	18	26	32	35	13	7	19	55	36	43	18	14	9	42	44	11
ENSMUSG00000001248	Gramd1a	3301	435	428	372	503	509	371	505	471	417	627	499	201	428	494	221	546	562	99
ENSMUSG00000001249	Hpn	2983	27	15	28	13	9	7	48	80	41	47	31	23	23	37	10	17	15	7
ENSMUSG00000001260	Gabrg1	4771	0	0	0	0	0	0	0	0	0	0	0	0	0	0	0	0	0	8
ENSMUSG00000001270	Ckb	1472	2741	2837	2622	3449	2893	2400	2089	1729	1997	2155	1950	1553	2806	3728	1628	4604	4526	1312
ENSMUSG00000001280	Sp1	8267	1590	1471	1609	1610	1759	1512	1792	1650	1690	2440	1938	1036	1542	2082	886	2226	2053	276
ENSMUSG00000001281	Itgb7	2743	837	1149	1024	1186	1123	691	571	685	663	587	651	964	1156	1252	490	1378	1279	367
ENSMUSG00000001285	Myg1	1235	227	276	265	302	224	186	235	217	237	253	180	186	223	287	136	304	285	105
ENSMUSG00000001288	Rarg	3394	219	253	199	142	173	142	328	300	304	293	198	141	278	354	132	166	148	27
ENSMUSG00000001289	Pfdn5	793	954	926	1078	1325	786	708	1169	1246	1145	1281	1023	519	1017	1216	577	1175	1360	897
ENSMUSG00000001300	Efnb2	4793	3	14	5	2	7	7	11	9	6	3	3	4	7	7	4	7	6	1
ENSMUSG00000001305	Rrp15	1321	221	247	187	256	196	170	253	238	215	257	199	121	180	239	140	339	307	139
ENSMUSG00000001313	Rnd2	1394	73	79	59	96	81	58	45	55	54	66	40	55	66	89	30	106	93	20
ENSMUSG00000001323	Srr	3884	153	166	171	144	179	106	169	150	176	196	136	95	162	222	100	181	180	35
ENSMUSG00000001333	Sync	2042	1	0	2	0	0	0	0	0	0	1	0	0	0	0	0	1	1	1
ENSMUSG00000001334	Fndc5	2763	1	1	0	0	1	0	0	0	0	0	1	0	0	0	1	1	0	0
ENSMUSG00000001348	Acp5	1710	634	403	611	56	51	60	929	1353	907	86	107	90	554	952	308	99	72	16
ENSMUSG00000001349	Cnn1	2638	0	0	0	0	0	1	1	0	0	0	0	0	0	0	0	0	0	1
ENSMUSG00000001366	Fbxo9	2574	348	411	402	459	290	245	425	436	395	413	341	261	324	511	189	459	398	140
ENSMUSG00000001376	Vps50	5873	1097	1147	1184	1549	1071	911	1273	1153	1265	1464	1173	729	996	1464	662	1570	1615	595
ENSMUSG00000001380	Hars	1987	1158	1374	1141	1171	974	703	1275	1243	1224	1058	868	702	1129	1540	671	1349	1190	276
ENSMUSG00000001383	Zmat2	2257	1131	1191	1245	1331	933	620	1217	1194	1114	1079	902	874	1156	1360	633	1339	1363	394
ENSMUSG00000001403	Ube2c	2600	109	202	153	143	390	187	75	28	69	75	59	19	165	129	95	251	132	52
ENSMUSG00000001415	Smg5	4448	691	760	670	544	440	329	848	785	700	669	553	315	672	933	427	643	657	136
ENSMUSG00000001416	Cct3	2275	3373	4045	3409	3053	1889	1626	3452	3828	3262	2329	1970	1424	3470	4236	1835	2960	2943	1028
ENSMUSG00000001418	Glmp	4246	1624	1732	1511	1489	1762	1188	1641	1377	1474	1805	1430	1093	1493	2075	1046	2001	1997	338
ENSMUSG00000001419	Mef2d	5844	494	438	333	547	610	498	391	348	357	742	695	265	459	636	240	771	702	91
ENSMUSG00000001420	Tmem79	2912	9	15	5	13	6	5	9	10	10	16	10	6	11	7	7	12	9	2
ENSMUSG00000001424	Snd1	5347	3295	3476	3185	2736	2527	1976	3400	3615	3149	3144	2502	1509	3055	4354	1913	3447	3392	641
ENSMUSG00000001435	Col18a1	7021	8355	8086	6389	5411	4311	3887	5939	7937	5461	5427	5484	4566	8184	11351	4207	7376	6414	1349
ENSMUSG00000001436	Slc19a1	4432	77	93	62	84	97	65	108	78	62	101	94	57	77	77	40	109	115	20
ENSMUSG00000001440	Kpnb1	5894	3831	4147	3575	3119	3125	2430	4206	4242	3916	3775	3226	1631	3555	5077	2193	4217	4028	688
ENSMUSG00000001441	Npepps	4217	746	751	761	644	664	531	780	791	810	823	737	551	773	1045	414	847	803	224
ENSMUSG00000001444	Tbx21	2488	0	1	2	0	0	0	0	0	1	0	0	0	0	0	0	0	2	0
ENSMUSG00000001445	Mrpl10	1708	302	316	336	322	353	275	336	346	332	401	312	279	337	477	186	446	402	96
ENSMUSG00000001467	Cyp51	3931	3244	3132	2561	3961	2743	1878	2451	2284	2135	3290	2851	898	2818	3450	1230	3939	4637	1086
ENSMUSG00000001472	Tcf25	5300	4272	3861	3820	3592	2836	2277	4184	4267	4049	4139	3294	2332	3869	5224	2277	4098	3934	895
ENSMUSG00000001473	Tubb6	1757	1498	1560	1685	1580	1508	1255	1058	1546	1173	1220	1278	621	1563	1980	826	2266	2000	444
ENSMUSG00000001482	Def8	4408	942	1140	855	795	665	494	903	1033	946	855	710	757	965	1276	544	889	816	169
ENSMUSG00000001493	Meox1	2228	0	0	0	1	0	0	0	0	2	0	0	0	0	0	0	1	0	5
ENSMUSG00000001494	Sost	2066	0	0	0	0	0	1	0	0	0	0	0	0	0	0	0	0	0	0
ENSMUSG00000001496	Nkx2-1	2842	0	0	0	0	0	0	0	0	0	0	0	0	0	0	1	0	0	0
ENSMUSG00000001497	Pax9	4347	0	0	0	0	0	0	0	0	0	0	0	0	0	0	0	0	0	0
ENSMUSG00000001504	Irx2	2764	1	0	0	0	0	0	0	0	0	0	0	0	0	0	0	0	0	9
ENSMUSG00000001506	Col1a1	5930	0	2	3	0	2	4	0	1	0	1	1	1	1	3	0	2	2	2
ENSMUSG00000001507	Itga3	5254	0	1	1	0	0	1	0	0	0	0	0	0	0	1	0	0	0	4
ENSMUSG00000001508	Sgca	1735	0	0	0	0	0	0	0	0	0	0	0	0	0	0	0	0	0	1
ENSMUSG00000001510	Dlx3	2607	0	0	0	0	0	0	0	0	0	0	0	0	0	0	0	0	0	0
ENSMUSG00000001517	Foxm1	1285	23	46	30	41	96	50	33	16	10	39	31	14	47	24	18	61	36	16
ENSMUSG00000001518	Itfg2	3293	96	108	103	87	82	53	113	130	118	95	82	50	72	125	53	117	81	16
ENSMUSG00000001520	Nrip2	1057	0	0	0	0	0	0	0	0	0	0	0	0	0	0	1	0	0	0
ENSMUSG00000001521	Tulp3	4423	107	103	74	77	85	60	108	109	102	101	77	50	70	116	49	98	85	23
ENSMUSG00000001524	Gtf2h4	1807	126	179	167	200	193	129	156	148	143	199	151	132	163	217	82	215	202	47
ENSMUSG00000001525	Tubb5	2949	7370	9229	7273	7965	9659	6800	7144	7637	6553	6552	6207	2933	7559	9106	4867	10553	9535	2055
ENSMUSG00000001542	Ell2	4382	4968	3779	4388	2034	2173	1914	4702	4063	3545	2896	2369	1308	4882	6270	2265	3583	3184	528
ENSMUSG00000001552	Jup	3220	6	3	7	11	15	9	2	6	4	6	3	7	2	10	2	15	7	0
ENSMUSG00000001555	Fkbp10	2584	1	0	2	0	0	1	0	0	0	0	1	0	0	2	0	0	0	0
ENSMUSG00000001558	Klhl10	2161	0	1	2	3	1	0	2	0	0	1	0	3	3	2	1	3	4	0
ENSMUSG00000001566	Mnx1	2250	0	0	0	0	0	0	0	0	0	1	0	0	0	0	0	0	0	0
ENSMUSG00000001569	Nom1	9219	638	645	572	727	605	412	697	651	629	779	622	458	604	780	311	845	766	228
ENSMUSG00000001576	Ergic1	2881	1109	1101	1040	847	1122	851	945	979	895	849	864	446	1030	1485	653	1517	1329	180
ENSMUSG00000001583	Tnk1	3329	0	0	0	0	0	0	0	0	0	0	0	0	1	0	0	0	0	0
ENSMUSG00000001588	Acap1	2581	5	11	12	34	25	31	8	9	6	71	16	10	9	14	5	28	33	11
ENSMUSG00000001604	Tcea3	1323	22	23	14	10	8	10	24	24	37	16	13	25	17	34	16	18	12	2
ENSMUSG00000001622	Csn3	2561	0	1	0	0	0	0	0	0	0	0	0	0	0	1	0	0	0	8
ENSMUSG00000001627	Ifrd1	3836	1029	1351	1031	989	885	763	1172	1101	1136	1093	851	482	1226	1253	583	1401	1339	397
ENSMUSG00000001630	Stk38l	4880	201	140	220	165	123	101	243	225	256	179	149	113	226	237	103	190	191	63
ENSMUSG00000001632	Brpf1	4899	1316	1224	1213	1033	981	766	1514	1526	1306	1423	1155	858	1334	1791	662	1306	1143	212
ENSMUSG00000001642	Akr1b3	1456	1085	1262	1090	1408	1166	989	1000	1031	1016	1162	867	5929	1039	1294	646	1380	1314	608
ENSMUSG00000001655	Hoxc13	2461	0	2	0	0	0	0	0	0	0	0	0	0	1	1	0	0	0	1
ENSMUSG00000001656	Hoxc11	2021	0	0	0	0	0	0	0	0	0	0	0	0	0	0	0	0	0	0
ENSMUSG00000001657	Hoxc8	1868	0	0	0	0	0	0	1	0	0	0	0	0	0	0	0	0	0	4
ENSMUSG00000001661	Hoxc6	1581	0	0	0	0	0	0	0	0	0	0	0	0	0	0	0	0	0	0
ENSMUSG00000001663	Gstt1	1528	5	7	16	5	2	1	14	9	4	3	0	4	9	15	2	0	2	1
ENSMUSG00000001665	Gstt3	896	19	23	14	34	44	11	3	5	6	20	11	12	10	9	7	36	22	5
ENSMUSG00000001666	Ddt	199	20	25	12	14	9	9	13	12	15	14	12	7	26	10	8	17	12	10
ENSMUSG00000001670	Tat	2405	0	0	0	0	0	0	0	0	1	0	0	0	2	0	0	0	0	0
ENSMUSG00000001672	Marveld3	3196	0	0	0	0	0	0	0	0	0	0	0	0	0	0	1	0	0	0
ENSMUSG00000001674	Ddx18	2258	312	334	278	296	307	215	332	317	306	365	255	179	304	357	186	371	334	101
ENSMUSG00000001687	Ubl3	2664	3424	3834	3331	3894	3210	2387	3474	3784	3501	3877	3444	2191	3377	4678	1809	4265	4471	1203
ENSMUSG00000001700	Gramd3	2605	209	225	233	218	183	151	199	194	219	261	159	106	178	284	99	248	271	77
ENSMUSG00000001707	Eef1e1	2553	316	416	267	365	278	210	336	325	328	307	248	115	335	379	199	464	469	178
ENSMUSG00000001729	Akt1	2944	2720	2917	2337	3172	3051	2133	2786	2838	2612	3397	2890	1571	2473	3570	1522	3786	3758	679
ENSMUSG00000001739	Cldn15	1902	2	3	0	4	0	2	1	6	2	3	0	2	3	1	1	2	1	2
ENSMUSG00000001741	Il16	5836	190	187	152	347	300	210	239	234	295	387	249	256	140	229	125	260	330	111
ENSMUSG00000001750	Tcirg1	3312	9459	7589	8431	5882	5203	3933	9182	10685	9168	7722	6527	6703	8930	12236	4653	7262	7028	1193
ENSMUSG00000001751	Naglu	2560	1771	1540	1584	2897	2029	1511	1337	1311	1330	2314	1860	1023	1635	2244	884	2985	3071	573
ENSMUSG00000001755	Coasy	2446	356	362	261	377	290	241	358	304	304	334	307	214	317	418	198	341	366	89
ENSMUSG00000001761	Smo	3779	4	0	3	2	6	0	0	0	1	2	2	2	5	2	0	2	1	3
ENSMUSG00000001763	Tspan33	1994	4	9	9	5	6	7	8	6	5	7	15	6	7	13	11	8	9	0
ENSMUSG00000001767	Crnkl1	3428	724	777	786	767	623	446	770	797	811	785	636	580	642	918	382	852	781	213
ENSMUSG00000001768	Rin2	4996	3837	2178	5329	3618	2797	2346	4994	5852	4255	4298	3631	3995	3280	5203	1527	4826	4913	872
ENSMUSG00000001773	Folh1	3125	1	0	0	0	0	0	0	0	0	0	0	0	0	0	0	0	0	5
ENSMUSG00000001774	Chordc1	5888	891	1000	942	861	801	617	930	736	929	808	715	490	828	1200	533	1067	1030	242
ENSMUSG00000001783	Rtcb	2009	2003	2206	1803	2361	1661	1321	2072	2413	2004	2225	1785	1131	1853	2431	1127	2363	2514	849
ENSMUSG00000001785	Pwp1	2784	667	818	724	777	536	395	765	747	692	641	535	346	655	901	450	753	841	209
ENSMUSG00000001786	Fbxo7	5530	248	209	244	211	185	139	302	309	324	271	245	228	269	311	107	223	269	48
ENSMUSG00000001794	Capns1	1677	3848	4146	3682	3685	3374	2559	4041	4015	3674	3750	2961	2029	3737	4961	2288	4226	4081	966
ENSMUSG00000001802	Lrp3	4147	0	0	0	0	0	0	2	0	1	0	0	0	0	0	0	0	0	1
ENSMUSG00000001804	Dsg4	3478	0	0	0	0	0	0	0	0	0	0	0	0	0	0	0	0	0	5
ENSMUSG00000001815	Evx2	4191	0	0	0	0	0	0	0	0	0	0	0	0	1	0	0	0	0	1
ENSMUSG00000001819	Hoxd13	2483	0	0	0	0	0	0	0	0	0	0	0	0	0	1	0	0	0	2
ENSMUSG00000001823	Hoxd12	2534	1	0	0	0	0	0	0	0	0	0	0	0	0	0	0	0	0	0
ENSMUSG00000001827	Folr1	2233	16	10	9	16	12	8	2	10	4	6	5	27	5	24	8	16	12	8
ENSMUSG00000001829	Clpb	6822	385	447	350	483	366	300	337	350	416	400	340	265	343	464	239	492	507	180
ENSMUSG00000001833	Sept7	2538	4407	4559	4642	6049	3855	3446	4544	4129	4449	4496	3866	2891	4578	5467	2312	5945	6047	2019
ENSMUSG00000001844	Zdhhc4	1983	314	279	213	266	243	180	289	258	282	265	216	182	242	347	170	305	291	44
ENSMUSG00000001847	Rac1	4216	2949	2877	2611	1851	3079	2109	3222	3144	3042	3279	2609	2028	2709	3837	1565	2962	2666	352
ENSMUSG00000001855	Nup214	8072	554	610	460	440	524	406	512	493	495	641	542	330	498	747	321	685	623	89
ENSMUSG00000001864	Aif1l	3117	0	0	0	0	0	0	0	0	2	0	0	0	0	1	0	1	0	0
ENSMUSG00000001865	Cpa3	1246	0	0	0	0	0	0	0	0	0	0	0	0	0	0	0	1	1	0
ENSMUSG00000001870	Ltbp1	6962	4	10	8	2	0	1	6	4	5	2	1	18	5	4	3	4	3	9
ENSMUSG00000001891	Ugp2	2870	2495	2658	2444	2674	2044	1675	2447	2205	2430	1976	1857	1575	2374	3156	1409	3093	2782	803
ENSMUSG00000001901	Kcnh6	3417	0	1	1	0	0	0	0	2	0	0	0	0	3	0	0	0	0	4
ENSMUSG00000001909	Trmt1	3237	310	375	276	497	384	288	330	328	318	497	365	186	294	384	171	542	527	161
ENSMUSG00000001910	Nacc1	4300	826	799	698	636	849	563	739	848	746	827	608	561	730	1124	439	900	780	147
ENSMUSG00000001911	Nfix	6796	57	32	39	42	32	32	76	75	74	81	54	97	36	50	23	31	60	28
ENSMUSG00000001918	Slc1a5	2764	427	455	296	384	394	248	259	220	141	364	257	88	347	537	197	525	495	69
ENSMUSG00000001924	Uba1	4272	6162	6250	6289	4015	4106	3045	7501	7683	6867	4766	3997	3864	5966	7787	3638	5128	4793	913
ENSMUSG00000001930	Vwf	9782	883	1044	575	1555	1683	1051	530	618	520	1159	1211	682	804	1150	433	1921	1931	309
ENSMUSG00000001942	Siae	6042	677	811	663	995	1016	678	590	495	558	900	674	396	704	793	438	1112	1066	203
ENSMUSG00000001943	Vsig2	1567	1	0	0	0	0	1	0	0	0	0	0	0	0	0	0	0	2	3
ENSMUSG00000001946	Esam	2519	7	20	5	7	10	3	0	6	8	1	7	9	11	9	6	11	5	1
ENSMUSG00000001948	Spa17	992	9	7	5	14	13	10	7	2	4	13	4	7	15	6	6	15	16	5
ENSMUSG00000001962	Fam50a	1306	599	598	623	918	655	527	613	691	641	957	747	404	606	850	426	1033	1004	320
ENSMUSG00000001964	Emd	2362	415	471	402	396	423	287	410	370	392	457	418	197	462	475	214	520	524	153
ENSMUSG00000001983	Taco1	1383	149	137	155	164	130	88	155	157	160	135	121	119	113	178	77	187	155	51
ENSMUSG00000001985	Grik3	8973	3	1	0	1	0	1	0	0	0	2	1	0	1	1	0	1	1	3
ENSMUSG00000001986	Gria3	5250	4	1	3	1	3	0	0	0	2	0	2	0	1	1	0	1	1	7
ENSMUSG00000001988	Npas1	2095	1	0	0	0	0	0	0	0	0	0	1	0	0	0	0	0	0	0
ENSMUSG00000001995	Sipa1l2	6703	779	565	614	632	622	557	726	783	671	913	835	496	565	902	356	882	836	180
ENSMUSG00000001998	Ap4e1	5674	365	399	357	485	395	336	446	397	450	632	405	282	395	544	192	604	590	136
ENSMUSG00000001999	Blvra	1669	1521	1476	1474	2418	1649	1246	1501	1297	1397	2072	1515	1077	1295	1578	733	2182	2386	695
ENSMUSG00000002006	Pdzd4	3970	0	3	0	4	1	0	0	2	1	0	2	1	0	0	0	2	1	0
ENSMUSG00000002007	Srpk3	1981	3	8	4	6	1	4	3	1	1	5	1	0	0	1	0	14	4	10
ENSMUSG00000002010	Idh3g	1331	592	666	559	695	892	564	557	496	523	929	654	455	524	713	415	815	836	112
ENSMUSG00000002012	Pnck	1877	0	1	0	3	5	1	0	0	0	5	0	0	0	1	0	1	1	0
ENSMUSG00000002014	Ssr4	802	1691	1763	1679	2173	1291	1127	1695	1862	1603	1779	1401	907	1584	1968	867	2016	2108	1262
ENSMUSG00000002015	Bcap31	1219	2243	2253	2382	2340	1720	1316	2050	2207	2265	1807	1602	1156	2155	3035	1234	2276	2551	696
ENSMUSG00000002017	Fam98a	2817	358	427	313	379	294	225	380	291	366	285	281	235	316	435	184	460	424	128
ENSMUSG00000002020	Ltbp2	6769	41	23	12	15	12	15	58	25	33	78	45	39	18	24	12	18	11	10
ENSMUSG00000002028	Kmt2a	16569	349	316	286	335	403	422	414	315	362	634	491	204	399	454	200	519	429	77
ENSMUSG00000002031	Ift46	4348	257	260	205	337	290	264	243	239	216	373	256	237	268	279	123	370	367	114
ENSMUSG00000002032	Tmem25	2872	7	3	2	4	5	4	6	1	2	3	3	2	3	5	0	5	4	2
ENSMUSG00000002033	Cd3g	1023	0	0	0	0	0	0	0	0	0	0	0	0	0	0	0	1	0	1
ENSMUSG00000002043	Trappc6a	787	362	408	375	413	324	267	461	457	472	350	334	233	397	505	206	427	458	212
ENSMUSG00000002052	Supt6	6488	1677	1716	1669	1373	1263	1025	1827	1730	1774	1533	1224	960	1659	2066	906	1782	1544	305
ENSMUSG00000002055	Spag5	3887	140	237	203	362	447	309	83	43	97	130	96	66	166	151	143	356	266	133
ENSMUSG00000002057	Foxn1	3214	1	0	0	0	0	0	0	0	0	1	0	0	0	0	0	0	0	0
ENSMUSG00000002058	Unc119	1489	327	414	290	348	365	239	323	276	350	318	246	181	281	451	201	402	419	102
ENSMUSG00000002059	Rab34	1772	141	139	94	174	123	94	212	177	203	239	152	87	161	181	71	227	205	49
ENSMUSG00000002064	Sdf2	1268	882	876	871	1227	770	601	819	916	854	1051	845	517	814	1112	395	1192	1337	606
ENSMUSG00000002068	Ccne1	2079	46	98	66	103	114	94	51	45	58	56	85	33	55	69	42	153	113	39
ENSMUSG00000002076	Hsf2bp	2867	4	4	6	3	5	4	6	2	4	9	5	4	0	0	1	11	9	18
ENSMUSG00000002083	Bbc3	2014	96	82	89	127	118	79	72	100	78	132	91	57	106	81	37	116	123	40
ENSMUSG00000002100	Mybpc3	4163	25	34	34	16	18	12	65	49	44	23	15	16	44	55	17	25	19	6
ENSMUSG00000002102	Psmc3	2044	2876	3388	3011	3263	1972	1573	3093	3179	2886	2309	1874	1727	2852	3440	1806	2795	2758	1403
ENSMUSG00000002103	Acp2	4692	6048	4960	5606	2297	2166	1834	6964	7571	6806	3981	3216	2306	5508	8597	3309	3269	3045	459
ENSMUSG00000002104	Rapsn	1627	18	18	9	59	46	21	19	3	9	33	25	5	17	7	12	39	42	15
ENSMUSG00000002105	Slc39a13	2533	192	192	170	100	124	95	228	221	196	190	140	97	172	271	108	181	132	21
ENSMUSG00000002107	Celf2	10065	1781	1592	1978	1654	2140	1446	1869	1563	1805	2326	1990	1779	1644	2567	945	2582	2458	332
ENSMUSG00000002108	Nr1h3	2149	503	372	566	175	97	133	512	702	544	234	227	348	468	618	248	188	204	96
ENSMUSG00000002109	Ddb2	2325	46	44	59	68	47	29	37	25	49	52	42	31	34	51	21	34	58	7
ENSMUSG00000002111	Spi1	2198	3792	3430	3412	1730	2465	1770	4121	4508	3719	3596	2728	2472	3814	4989	2048	3115	2786	387
ENSMUSG00000002129	Sf3a1	4920	535	544	501	491	651	445	502	471	516	580	489	361	573	756	320	647	606	101
ENSMUSG00000002147	Stat6	3775	3054	3146	2894	3562	3263	2474	3300	3120	3187	4433	3404	2791	2922	4257	1886	4191	4162	799
ENSMUSG00000002190	Clgn	4025	2	0	0	1	0	1	0	0	0	0	1	1	3	0	1	3	0	6
ENSMUSG00000002204	Napsa	1560	1454	1392	1327	1417	1300	853	1902	2099	1695	2040	1709	1235	1543	2049	756	1826	1782	375
ENSMUSG00000002205	Vrk3	2502	372	415	393	366	285	228	445	414	415	411	320	195	317	556	227	374	419	57
ENSMUSG00000002210	Smg9	2389	423	350	357	180	258	161	363	343	242	298	220	133	387	581	219	299	303	49
ENSMUSG00000002221	Paxip1	5850	252	211	199	275	319	261	257	244	228	350	322	195	219	318	137	343	340	53
ENSMUSG00000002222	Rmnd5a	6165	1297	1314	1117	2020	1636	1305	1397	1238	1520	2101	1901	677	1119	1635	606	2102	2094	499
ENSMUSG00000002227	Mov10	3760	418	248	682	60	75	56	693	686	627	141	71	556	421	639	235	96	83	23
ENSMUSG00000002228	Ppm1j	1721	0	4	0	2	1	3	2	0	0	0	0	0	0	1	1	3	0	4
ENSMUSG00000002233	Rhoc	1423	589	498	741	400	318	381	385	458	419	256	313	359	714	870	308	687	685	190
ENSMUSG00000002240	Prr27	1337	0	0	0	0	0	0	0	0	0	1	0	0	0	0	0	0	0	1
ENSMUSG00000002249	Tead3	3005	1	0	0	0	0	0	0	0	0	0	0	1	1	0	0	0	0	5
ENSMUSG00000002250	Ppard	3270	88	80	80	82	92	74	77	67	84	90	88	42	91	96	48	83	102	26
ENSMUSG00000002257	Def6	2277	352	487	313	512	478	325	359	246	343	513	348	298	350	410	243	544	477	195
ENSMUSG00000002265	Peg3	8694	1	2	1	0	0	0	1	0	1	1	0	1	0	1	0	0	0	5
ENSMUSG00000002266	Zim1	7819	1	3	0	1	0	0	0	0	0	1	0	0	1	0	0	1	0	4
ENSMUSG00000002274	Metrn	1434	122	191	167	248	195	113	123	133	176	122	144	148	157	186	79	248	233	94
ENSMUSG00000002279	Lmf1	2457	158	172	155	162	160	114	171	165	161	178	162	126	149	230	119	181	181	32
ENSMUSG00000002280	Narfl	2530	439	431	445	451	384	275	418	456	479	448	360	284	391	618	219	499	520	161
ENSMUSG00000002289	Angptl4	3053	6	7	4	12	9	9	1	1	2	12	6	4	9	4	5	22	13	3
ENSMUSG00000002297	Dbf4	2785	230	336	254	405	555	284	256	187	190	325	245	125	279	300	164	416	413	151
ENSMUSG00000002307	Daxx	2872	2145	1297	3021	522	445	401	3074	3985	3111	912	650	2614	2104	2923	952	615	597	132
ENSMUSG00000002308	Cd320	2415	72	92	80	141	70	70	63	61	52	96	93	117	57	82	52	120	131	50
ENSMUSG00000002319	Ipo4	3846	312	390	296	414	383	312	285	334	338	464	343	246	296	411	205	500	414	83
ENSMUSG00000002320	Tm9sf1	2979	1122	1139	1096	1200	990	714	1138	1065	1038	1216	1018	714	1120	1493	606	1401	1352	276
ENSMUSG00000002324	Rec8	2184	1	0	2	0	0	0	0	0	0	0	0	2	0	0	1	1	0	0
ENSMUSG00000002325	Irf9	2429	1300	1186	1330	451	459	412	1587	1560	1488	1011	739	1031	1318	1862	683	700	590	166
ENSMUSG00000002326	Gmpr2	1543	805	873	714	835	548	479	885	841	870	769	629	477	767	959	448	854	857	401
ENSMUSG00000002329	Mdp1	1733	405	442	351	520	289	243	394	377	396	459	305	235	357	545	217	488	490	189
ENSMUSG00000002332	Dhrs1	1475	831	765	788	701	711	477	796	736	825	766	543	481	724	947	382	848	847	200
ENSMUSG00000002341	Ncan	7081	1	0	1	0	0	1	0	0	1	0	0	0	0	0	1	1	0	6
ENSMUSG00000002342	Tmem161a	3018	260	344	270	332	246	162	295	305	296	281	231	167	306	342	160	350	326	85
ENSMUSG00000002343	Armc6	2427	72	188	125	116	148	134	76	49	132	106	81	76	142	99	45	216	106	31
ENSMUSG00000002345	Borcs8	953	167	218	210	220	207	173	139	145	183	219	142	122	200	226	103	246	218	72
ENSMUSG00000002346	Slc25a42	3196	15	22	12	10	19	11	12	4	12	17	7	10	16	16	5	26	15	11
ENSMUSG00000002365	Snx9	2411	1045	1005	829	1135	1344	994	997	1079	1016	1614	1262	748	890	1355	565	1597	1548	312
ENSMUSG00000002372	Ranbp3	2511	698	707	691	744	636	497	837	718	699	810	581	467	688	939	427	832	800	226
ENSMUSG00000002379	Ndufa11	2661	534	536	484	484	387	278	539	508	466	398	376	321	537	657	296	515	507	158
ENSMUSG00000002384	Bmp8b	2940	0	0	1	0	0	0	0	0	0	0	0	0	1	0	1	0	1	0
ENSMUSG00000002393	Nr2f6	2291	298	287	241	395	287	243	281	304	279	467	350	171	252	368	138	408	360	109
ENSMUSG00000002395	Use1	1223	1368	1150	1142	1463	899	858	1634	1661	1213	1513	1297	549	1121	1667	717	1335	1801	901
ENSMUSG00000002396	Ocel1	6990	319	399	396	294	308	240	315	304	421	305	243	310	336	395	144	424	293	106
ENSMUSG00000002409	Dyrk1b	2695	43	27	34	60	74	43	28	17	37	69	69	44	45	43	24	88	57	19
ENSMUSG00000002413	Braf	9847	964	814	884	697	769	755	1027	822	971	981	921	334	932	1320	500	1079	995	138
ENSMUSG00000002416	Ndufb2	4375	396	456	394	610	352	288	396	376	358	447	365	226	385	486	186	534	605	687
ENSMUSG00000002428	Hltf	4955	916	980	1078	1068	743	645	1164	1045	1179	1106	844	663	917	1192	526	1110	1130	326
ENSMUSG00000002455	Prpf6	3148	1140	1246	1226	1393	948	828	1228	1230	1258	1368	898	753	1014	1394	618	1306	1198	264
ENSMUSG00000002458	Rgs19	2140	858	925	754	572	754	470	866	848	797	891	686	463	830	1226	461	945	836	127
ENSMUSG00000002459	Rgs20	2514	0	0	0	0	0	0	0	0	0	0	0	0	0	1	0	0	0	1
ENSMUSG00000002475	Abhd3	1962	229	174	259	169	87	93	50	44	46	30	28	28	182	159	126	197	139	60
ENSMUSG00000002477	Snrpd1	837	488	557	532	661	427	344	535	507	470	465	405	297	487	593	330	671	629	419
ENSMUSG00000002486	Tchp	2696	62	62	82	82	68	59	72	69	61	95	52	58	69	100	37	89	95	28
ENSMUSG00000002489	Tiam1	9141	1457	1309	1275	1030	1176	850	1345	1338	1283	1301	1011	1593	1342	2004	764	1488	1234	205
ENSMUSG00000002496	Tsc2	6018	597	541	484	569	618	525	503	397	458	665	520	384	490	679	271	800	700	93
ENSMUSG00000002500	Rpl3l	1643	1	1	0	1	1	1	9	4	8	4	4	3	1	0	3	1	2	4
ENSMUSG00000002504	Slc9a3r2	2257	0	2	2	2	3	0	2	1	0	8	6	3	0	4	1	2	2	3
ENSMUSG00000002524	Puf60	1912	1251	1317	1277	1357	1095	848	1330	1388	1305	1352	1133	806	1149	1649	786	1502	1482	441
ENSMUSG00000002546	Golga2	4659	1334	1265	1207	1384	1124	821	1354	1336	1324	1329	1071	858	1233	1562	719	1405	1364	353
ENSMUSG00000002550	Uck1	2354	317	291	256	372	219	186	297	295	262	338	261	159	353	372	157	348	378	126
ENSMUSG00000002565	Scin	2999	0	0	2	0	0	3	0	1	0	0	0	0	1	0	1	4	0	1
ENSMUSG00000002578	Ikzf4	5830	0	0	0	0	0	0	3	0	2	1	0	0	0	0	0	1	0	1
ENSMUSG00000002580	Mien1	747	489	509	525	664	399	301	572	561	477	500	388	364	474	612	291	589	593	278
ENSMUSG00000002588	Pon1	1513	0	1	0	0	0	0	0	0	0	0	0	0	1	0	0	0	0	4
ENSMUSG00000002602	Axl	4283	260	153	368	110	143	127	348	398	381	347	247	436	295	286	99	156	191	48
ENSMUSG00000002603	Tgfb1	2175	545	545	428	432	565	500	575	556	536	745	595	355	545	847	338	690	558	123
ENSMUSG00000002608	Ccdc97	3178	218	197	191	194	189	142	211	215	213	216	144	154	227	237	132	194	221	38
ENSMUSG00000002617	Zfp40	4482	127	160	131	157	132	112	112	85	83	144	71	50	133	162	85	146	180	38
ENSMUSG00000002625	Akap8l	2075	296	321	233	468	328	266	288	256	305	512	352	177	293	367	168	453	389	160
ENSMUSG00000002633	Shh	2847	0	0	0	0	0	0	0	0	0	1	0	0	0	0	0	0	0	0
ENSMUSG00000002635	Pdcd2l	1295	313	373	326	465	254	246	316	299	293	326	245	198	290	411	176	422	466	211
ENSMUSG00000002658	Gtf2f1	1717	1200	1199	1370	1005	845	632	1464	1376	1272	1069	771	1115	1202	1570	684	1257	1081	286
ENSMUSG00000002660	Clpp	1207	183	209	204	224	180	126	160	154	164	187	168	100	168	217	88	281	237	84
ENSMUSG00000002661	Alkbh7	921	89	129	128	145	121	85	127	104	118	139	112	95	103	152	53	143	159	48
ENSMUSG00000002664	Pspn	474	0	0	0	0	0	1	2	0	0	0	0	0	0	0	0	0	1	0
ENSMUSG00000002668	Dennd1c	2520	215	150	187	173	226	150	246	239	229	307	247	154	238	273	115	240	217	41
ENSMUSG00000002679	Med6	1128	348	291	320	274	215	200	414	376	330	308	226	231	287	360	168	301	315	109
ENSMUSG00000002688	Prkd1	3653	0	0	0	0	0	0	2	0	0	0	0	0	1	2	0	2	1	0
ENSMUSG00000002699	Lcp2	4188	1755	1486	1743	489	639	510	3038	3163	2374	1219	840	778	1768	2446	962	754	694	134
ENSMUSG00000002718	Cse1l	3641	867	992	799	931	976	829	823	742	878	997	882	629	773	1099	504	1336	1347	283
ENSMUSG00000002728	Naa20	3051	904	898	932	1277	869	689	953	949	830	1013	914	544	887	1236	524	1467	1443	414
ENSMUSG00000002731	Prkra	1614	328	334	334	441	334	231	418	337	305	381	260	176	279	448	184	429	410	145
ENSMUSG00000002732	Fkbp7	860	32	39	31	49	41	30	33	26	21	28	18	21	34	23	14	49	43	14
ENSMUSG00000002733	Plekha3	2534	458	478	407	413	381	315	542	552	541	529	443	246	477	683	304	585	527	110
ENSMUSG00000002741	Ykt6	2541	3091	2904	2929	3324	2292	1739	2936	3201	2738	2555	2229	1659	2908	3915	1463	3432	3557	902
ENSMUSG00000002748	Baz1b	6492	2225	2375	2401	1722	1717	1547	2609	2382	2415	2069	1772	1597	2225	2899	1319	2397	2002	521
ENSMUSG00000002763	Pex6	3200	298	318	287	392	267	250	292	332	313	441	362	244	264	416	159	411	373	121
ENSMUSG00000002767	Mrpl2	1038	511	501	465	502	415	288	521	439	514	442	346	358	488	581	277	547	533	155
ENSMUSG00000002768	Mea1	840	464	497	488	497	357	281	477	487	484	485	343	337	497	630	329	517	538	185
ENSMUSG00000002769	Gnmt	1035	7	3	4	4	4	3	2	4	8	7	4	4	3	9	4	4	4	5
ENSMUSG00000002771	Grin2d	6658	5	7	5	10	10	7	4	3	8	5	6	5	8	6	3	10	7	2
ENSMUSG00000002778	Kdelr1	1647	809	865	723	897	853	616	820	753	810	1009	827	559	705	1061	430	1055	1031	194
ENSMUSG00000002781	Tmem143	2630	82	99	103	159	126	98	102	88	91	112	126	74	73	93	50	158	166	25
ENSMUSG00000002797	Ggct	3960	48	73	38	22	20	15	201	225	223	68	47	88	60	59	45	41	27	10
ENSMUSG00000002799	Jag2	4854	9	8	9	43	32	23	1	2	3	25	10	6	4	5	2	46	31	16
ENSMUSG00000002803	Btbd6	2248	97	103	88	97	105	87	80	84	75	105	89	53	94	123	59	146	117	17
ENSMUSG00000002804	Nudt14	1241	177	144	116	245	173	134	117	137	120	178	147	99	147	187	105	222	219	63
ENSMUSG00000002808	Epdr1	2486	1	5	5	8	2	3	1	1	1	2	0	2	2	5	0	6	8	1
ENSMUSG00000002812	Flii	4060	4333	4256	4652	3311	3301	2432	4400	4784	4227	3971	3032	2699	4263	5994	2488	4350	3993	861
ENSMUSG00000002814	Top3a	4286	423	383	476	319	300	231	415	431	373	312	243	276	399	490	196	342	379	88
ENSMUSG00000002820	Atg4d	5951	247	243	286	275	192	145	284	305	263	240	191	244	259	349	165	264	282	106
ENSMUSG00000002825	Qtrt1	1316	55	75	44	88	51	43	57	48	43	72	67	51	36	61	24	90	82	25
ENSMUSG00000002831	Plin4	5777	0	0	0	0	0	0	0	0	0	0	0	0	0	0	0	0	0	1
ENSMUSG00000002833	Hdgfl2	2303	413	364	373	428	337	283	427	431	410	450	318	253	330	440	227	464	439	148
ENSMUSG00000002835	Chaf1a	3308	288	353	314	411	401	316	149	169	171	289	224	173	248	266	154	416	459	144
ENSMUSG00000002844	Adprh	1583	732	718	770	584	536	435	823	918	834	718	680	660	739	978	376	798	766	92
ENSMUSG00000002845	Tmem39a	2936	166	157	158	156	127	80	185	207	177	173	117	96	135	220	87	171	185	37
ENSMUSG00000002846	Timmdc1	1573	207	201	199	255	172	171	191	211	204	212	158	153	204	288	117	312	263	92
ENSMUSG00000002847	Pla1a	1972	4	3	6	0	0	0	6	7	4	3	0	20	2	3	2	0	0	0
ENSMUSG00000002870	Mcm2	3371	323	369	271	546	526	431	133	98	166	445	430	248	246	327	202	768	691	149
ENSMUSG00000002871	Tpra1	3815	585	580	553	847	757	632	549	476	594	1221	1018	580	524	798	354	984	1117	243
ENSMUSG00000002881	Nab1	4022	2725	2506	2584	1714	1533	1227	2910	2594	2866	2367	1852	1352	2586	3382	1288	2192	2071	356
ENSMUSG00000002885	Adgre5	2517	213	244	306	480	554	435	158	321	354	723	641	774	228	314	83	561	552	106
ENSMUSG00000002897	Il17ra	7752	593	540	510	774	765	547	568	674	517	1042	845	678	647	720	311	878	765	144
ENSMUSG00000002900	Lamb1	5843	2	2	0	0	0	1	4	1	1	0	1	0	2	2	0	0	0	2
ENSMUSG00000002908	Kcnn1	4587	9	19	23	13	12	9	12	11	19	11	7	5	15	11	15	19	19	3
ENSMUSG00000002910	Arrdc2	2355	170	129	128	232	151	124	207	210	176	245	196	86	153	205	66	193	180	44
ENSMUSG00000002930	Ppp1r17	1757	1	0	0	0	0	0	0	0	0	0	0	0	0	0	0	0	0	0
ENSMUSG00000002944	Cd36	3590	36359	31845	42137	47992	36812	38075	27677	34449	35345	53182	58042	22579	38416	51654	15951	75573	77943	14897
ENSMUSG00000002948	Map2k7	3771	507	523	450	427	458	364	612	472	479	639	507	287	491	692	298	675	588	85
ENSMUSG00000002949	Timm44	1790	496	504	495	592	480	353	493	476	468	560	472	320	515	634	263	587	613	196
ENSMUSG00000002957	Ap2a2	4637	2265	2251	2230	2511	2435	1894	2687	2358	2528	3321	2410	1414	2034	2797	1200	2966	2790	480
ENSMUSG00000002963	Pnkp	2204	512	564	459	527	441	287	584	576	537	614	475	392	437	593	265	559	543	163
ENSMUSG00000002968	Med25	4877	278	284	232	243	384	218	225	221	184	387	299	184	247	333	168	360	311	41
ENSMUSG00000002980	Bcam	2651	4	10	9	2	1	1	4	5	3	2	2	11	2	8	11	6	1	5
ENSMUSG00000002981	Clptm1	4143	2255	2228	2132	1983	1841	1386	2335	2477	2137	2050	1675	1360	2123	3077	1309	2487	2419	500
ENSMUSG00000002983	Relb	2609	1147	1051	979	454	386	360	1206	1532	963	941	668	281	1099	1542	583	612	565	87
ENSMUSG00000002984	Tomm40	1858	581	739	561	570	496	410	705	683	660	615	455	435	645	768	348	716	738	151
ENSMUSG00000002985	Apoe	2002	20515	11485	32426	27271	17893	23014	23655	39446	2861	46865	40517	1074	13596	37119	8339	29570	49108	10653
ENSMUSG00000002992	Apoc2	162	0	0	0	0	0	0	0	0	0	0	0	0	0	0	1	0	0	1
ENSMUSG00000002996	Hbp1	5278	2920	2646	2801	2298	2129	1637	3620	3742	3566	2979	2483	1570	2773	3696	1383	2451	2584	569
ENSMUSG00000002997	Prkar2b	3652	2001	2864	1870	1037	847	672	2029	1893	2093	941	889	407	1945	2530	1209	1061	1083	261
ENSMUSG00000003031	Cdkn1b	4552	854	739	766	894	805	612	790	684	745	1016	732	503	837	897	413	887	857	239
ENSMUSG00000003032	Klf4	3049	70	94	54	124	213	120	58	47	35	246	161	125	81	69	18	197	161	53
ENSMUSG00000003033	Ap1m1	2470	582	694	624	583	594	417	510	485	632	671	524	398	652	790	317	737	654	104
ENSMUSG00000003037	Rab8a	4550	2773	2572	2766	2435	1640	1245	2944	2988	2669	2294	1745	1659	2613	3672	1605	2381	2487	845
ENSMUSG00000003038	Hmgn2	2073	449	516	414	400	503	347	466	404	278	309	288	149	457	527	295	480	405	158
ENSMUSG00000003039	Fam32a	2564	1375	1756	1860	1452	1039	772	1573	1722	2179	1482	1275	1014	1771	1943	709	1467	1688	432
ENSMUSG00000003051	Elf3	2095	0	1	1	2	1	0	0	0	1	0	0	0	0	2	0	0	0	4
ENSMUSG00000003053	Cyp2c29	2022	0	1	0	0	0	0	0	0	0	0	0	0	0	1	0	0	0	0
ENSMUSG00000003062	Stard3nl	1946	1190	1051	1163	1230	727	540	1021	1203	1268	934	755	679	1077	1520	504	1123	1216	353
ENSMUSG00000003068	Stk11	2792	1226	1296	1204	1319	1046	772	1291	1302	1184	1357	1141	811	1225	1532	666	1356	1274	350
ENSMUSG00000003070	Efna2	2131	1	7	4	0	0	0	7	7	7	3	1	9	6	10	8	3	1	1
ENSMUSG00000003072	Atp5d	1415	707	750	607	543	777	494	739	713	676	907	664	431	672	888	446	807	792	142
ENSMUSG00000003099	Ppp5c	2072	451	495	422	559	504	367	417	356	377	522	445	267	412	564	231	625	588	88
ENSMUSG00000003119	Cdk12	6974	701	741	609	641	743	501	820	708	772	991	761	537	816	1061	410	895	855	124
ENSMUSG00000003123	Lipe	5747	375	353	449	201	204	139	558	561	502	274	220	275	367	564	210	232	221	53
ENSMUSG00000003131	Pafah1b2	7530	2707	2380	2551	2275	1717	1398	2515	2716	2416	1981	1841	1236	2506	3282	1327	2547	2506	626
ENSMUSG00000003134	Tbc1d8	4862	370	321	326	181	199	177	395	418	378	469	312	173	225	488	183	314	301	37
ENSMUSG00000003135	Cnot11	3482	355	373	316	456	364	260	372	376	361	488	333	262	340	378	166	458	446	128
ENSMUSG00000003153	Slc2a3	4369	218	202	184	465	376	219	116	101	98	331	248	247	165	213	113	391	414	115
ENSMUSG00000003154	Foxj2	5271	460	475	365	391	442	362	413	393	393	530	414	296	412	630	253	546	461	71
ENSMUSG00000003161	Sri	2617	1935	2043	1839	1816	1295	895	1954	1907	1879	1474	1163	944	1970	2478	1020	1813	1785	632
ENSMUSG00000003166	Dgcr2	4045	603	620	547	553	634	456	673	658	662	848	705	411	610	889	277	761	747	90
ENSMUSG00000003184	Irf3	2568	395	376	347	363	334	268	446	442	428	476	378	290	383	486	221	433	510	127
ENSMUSG00000003190	Bcl2l12	1364	80	65	57	60	67	31	52	57	66	44	33	43	50	88	36	81	60	17
ENSMUSG00000003198	Zfp959	2158	136	102	107	95	94	71	133	116	139	155	120	59	111	128	53	124	113	71
ENSMUSG00000003199	Mpnd	1877	907	1058	951	1009	688	553	971	983	915	700	563	380	1006	1145	496	920	972	327
ENSMUSG00000003200	Sh3gl1	2072	790	700	687	728	699	501	806	717	729	886	663	521	623	877	402	832	869	146
ENSMUSG00000003206	Ebi3	1170	533	531	570	109	178	149	783	779	740	261	204	203	563	772	360	206	220	23
ENSMUSG00000003208	Ccdc94	1311	167	147	147	101	95	82	195	181	145	192	115	91	155	241	105	156	120	23
ENSMUSG00000003226	Ranbp2	9608	8557	7079	10192	6330	5698	4911	9699	9596	9420	7613	5960	5552	7905	10642	4077	7878	7672	1703
ENSMUSG00000003227	Edar	3637	0	0	0	0	0	0	0	1	0	0	0	2	0	0	0	0	0	4
ENSMUSG00000003228	Grk5	3165	260	298	259	209	193	127	312	348	331	373	248	232	248	373	144	282	253	76
ENSMUSG00000003233	Dvl3	2735	57	66	64	51	56	49	75	58	70	85	68	44	65	78	31	74	69	14
ENSMUSG00000003234	Abcf3	3090	807	835	752	907	630	495	874	826	756	868	742	527	794	942	450	923	943	293
ENSMUSG00000003235	Eif2b5	3209	988	1097	1035	1076	721	621	1062	1151	1066	992	804	684	922	1331	546	1106	1139	289
ENSMUSG00000003269	Cyth2	3415	614	664	617	859	639	493	663	744	621	766	591	353	648	843	364	855	896	288
ENSMUSG00000003271	Sult2b1	2366	2	2	3	3	1	2	0	1	0	0	0	1	0	8	2	5	2	3
ENSMUSG00000003273	Car11	1585	0	1	1	0	0	0	6	2	6	10	4	6	2	0	1	4	1	0
ENSMUSG00000003279	Dlgap1	8279	2	1	0	0	0	0	1	0	0	0	0	0	1	1	0	0	2	12
ENSMUSG00000003282	Plag1	4774	120	100	109	110	95	73	100	73	95	98	113	70	134	169	58	138	136	23
ENSMUSG00000003283	Hck	2092	7250	6501	8044	1605	1082	1144	8726	12403	8458	2370	2047	2722	7338	9877	3802	2105	1904	543
ENSMUSG00000003299	Mrpl4	1418	537	480	487	475	436	329	462	494	452	451	402	414	467	560	268	555	531	121
ENSMUSG00000003308	Keap1	4499	1735	1510	2120	1042	863	708	1995	2272	1986	1133	891	1321	1648	2175	878	1135	1078	289
ENSMUSG00000003309	Ap1m2	2586	0	1	0	0	0	0	1	1	0	0	0	0	1	1	0	0	1	2
ENSMUSG00000003316	Glg1	7090	3071	2769	2809	2929	3452	2941	2996	2531	2992	3988	3283	1815	2816	4088	1699	4548	4061	607
ENSMUSG00000003341	Atp8b3	4713	4	9	2	2	3	3	6	5	1	5	4	5	7	2	3	1	4	27
ENSMUSG00000003344	Btbd2	3044	214	279	248	254	258	180	242	223	262	257	243	178	203	304	147	294	278	44
ENSMUSG00000003345	Csnk1g2	2423	919	945	853	1122	1139	785	1009	973	904	1324	1042	651	887	1232	467	1282	1337	312
ENSMUSG00000003346	Abhd17a	1547	616	690	615	755	625	454	593	578	692	724	618	510	610	869	376	784	922	220
ENSMUSG00000003348	Mob3a	2972	1092	1126	877	1053	1116	814	1013	988	935	1362	1080	616	1018	1340	592	1342	1347	242
ENSMUSG00000003352	Cacnb3	3120	12	7	12	3	2	4	18	7	6	2	1	3	5	32	9	2	4	12
ENSMUSG00000003354	Ccdc65	1890	0	0	0	0	0	1	1	0	0	0	0	0	0	0	0	0	1	11
ENSMUSG00000003355	Fkbp11	731	0	5	6	9	6	3	3	2	3	3	2	3	4	6	4	9	8	1
ENSMUSG00000003360	Ddx23	3232	1469	1514	1413	1634	1325	1011	1763	1773	1638	1812	1427	1073	1447	1879	764	1809	1585	404
ENSMUSG00000003363	Pld3	2477	6227	4687	5395	6499	6023	4368	4937	5821	4986	7922	6525	4014	5263	8219	2948	8125	9110	1153
ENSMUSG00000003378	Grik5	3763	8	7	3	7	9	11	3	3	5	22	12	6	4	7	4	16	5	3
ENSMUSG00000003379	Cd79a	1457	0	1	0	0	1	0	1	3	0	0	1	0	0	0	0	0	0	0
ENSMUSG00000003380	Rabac1	853	1137	1093	1157	1530	912	783	1063	1225	1161	1345	1303	818	1179	1461	590	1435	1726	914
ENSMUSG00000003382	Etv3	7004	3131	2342	3164	1735	1518	1328	3749	3983	3059	2830	2562	1533	2638	4388	1220	2718	2595	386
ENSMUSG00000003402	Prkcsh	2431	1467	1443	1421	1350	1060	848	1364	1535	1360	1280	1006	946	1396	1968	763	1323	1406	343
ENSMUSG00000003410	Elavl3	6890	1	1	0	0	0	1	2	0	0	0	0	0	0	0	0	2	0	3
ENSMUSG00000003411	Rab3b	3372	2	1	0	1	2	0	3	1	1	1	0	1	1	1	0	0	4	1
ENSMUSG00000003418	St8sia6	7618	0	3	2	0	0	5	2	1	1	3	1	0	2	1	1	1	1	6
ENSMUSG00000003420	Fcgrt	1782	755	521	682	1298	662	584	1330	1461	1228	2317	1794	578	643	916	258	1005	1376	329
ENSMUSG00000003421	Nosip	1922	447	530	446	428	400	281	613	553	518	476	365	283	447	611	321	488	473	109
ENSMUSG00000003423	Pih1d1	1790	372	411	369	582	381	291	363	419	406	485	415	285	390	535	256	545	558	275
ENSMUSG00000003429	Rps11	661	3432	3560	3272	4482	3508	2639	3554	3751	3330	4830	3783	2017	3204	4365	2028	4576	5050	2173
ENSMUSG00000003435	Supt5	3772	1840	1870	1714	1774	1817	1271	1832	1924	1813	2131	1616	1267	1795	2315	1075	2314	2096	444
ENSMUSG00000003436	Dll3	2618	0	0	0	0	0	0	3	0	0	0	0	1	3	1	0	2	0	1
ENSMUSG00000003437	Paf1	2003	794	860	799	791	602	499	857	889	745	781	646	515	821	959	425	870	879	267
ENSMUSG00000003438	Timm50	1515	458	550	443	565	451	382	441	443	417	394	338	314	471	575	299	561	569	212
ENSMUSG00000003444	Med29	1281	70	86	76	59	59	46	72	61	60	61	64	62	64	66	41	92	64	17
ENSMUSG00000003452	Bicd1	9971	4	2	1	1	3	1	1	0	1	0	3	1	5	2	2	9	7	8
ENSMUSG00000003458	Ncstn	2901	2223	2105	2185	1554	1632	1232	2377	2511	2254	2065	1645	1282	2110	3188	1342	2154	1978	321
ENSMUSG00000003464	Pex19	3127	1122	1178	1095	1124	813	606	1113	1057	1067	965	797	723	1101	1367	550	1172	1097	248
ENSMUSG00000003469	Phyhip	2910	2	3	0	0	0	0	1	0	0	0	0	0	0	0	0	0	4	0
ENSMUSG00000003476	Crhr2	3051	0	0	0	0	0	0	0	0	0	1	0	0	0	0	0	0	0	1
ENSMUSG00000003477	Inmt	1077	0	0	0	0	0	0	0	0	0	0	0	0	0	0	0	0	1	0
ENSMUSG00000003484	Cyp4f18	1702	93	32	43	124	43	41	87	70	44	137	139	81	46	139	50	83	103	42
ENSMUSG00000003500	Impdh1	2849	958	1031	843	869	932	691	739	804	740	892	630	535	861	1209	525	1191	1091	226
ENSMUSG00000003505	Psg18	2917	0	0	1	1	0	0	0	1	0	0	0	0	0	0	0	0	0	0
ENSMUSG00000003518	Dusp3	4682	3687	3618	3061	5495	5275	3702	2381	2151	2440	5464	4414	2714	3285	4731	1953	7345	7164	1139
ENSMUSG00000003526	Prodh	3190	33	38	38	34	24	40	40	36	29	46	43	32	36	72	14	50	50	25
ENSMUSG00000003527	Dgcr14	2819	306	254	274	310	269	186	309	285	255	319	265	216	275	452	173	343	356	64
ENSMUSG00000003528	Slc25a1	1678	950	934	849	645	779	470	920	884	806	772	628	492	857	1091	447	840	847	143
ENSMUSG00000003531	Dgcr6	1854	187	163	183	264	184	114	153	190	187	186	148	106	176	253	99	211	222	87
ENSMUSG00000003534	Ddr1	4774	0	0	1	0	2	0	2	0	2	0	0	0	0	0	0	1	0	3
ENSMUSG00000003541	Ier3	1131	940	721	738	422	403	413	1389	1482	1223	1413	907	392	821	1283	453	492	634	142
ENSMUSG00000003545	Fosb	3782	1	2	3	126	92	57	0	0	2	194	101	27	0	0	1	158	125	32
ENSMUSG00000003546	Klc4	2322	1672	1754	1371	2565	1422	1126	1427	1321	1408	1887	1551	1210	1490	2130	840	2164	2219	841
ENSMUSG00000003549	Ercc1	1793	220	223	219	223	178	128	234	224	244	214	168	168	186	282	117	228	230	55
ENSMUSG00000003555	Cyp17a1	1815	0	0	1	0	0	0	0	0	0	0	0	0	0	0	0	0	0	1
ENSMUSG00000003559	As3mt	1751	13	15	14	24	5	9	61	23	28	52	36	39	17	24	16	22	7	12
ENSMUSG00000003573	Homer3	2852	438	470	382	781	602	433	326	375	347	762	633	346	342	580	213	825	833	183
ENSMUSG00000003575	Crtc1	5683	54	65	39	59	75	51	58	49	61	79	64	46	57	82	33	67	83	16
ENSMUSG00000003581	Rnf215	1874	160	152	161	206	140	107	239	240	166	286	196	108	187	266	96	213	228	38
ENSMUSG00000003585	Sec14l2	2631	2	2	0	2	2	0	1	0	2	2	3	0	1	0	2	2	2	6
ENSMUSG00000003604	Aven	4889	135	161	180	136	129	97	187	230	192	148	149	132	152	189	71	138	176	39
ENSMUSG00000003617	Cp	6371	964	641	1486	10	12	13	2949	3630	3218	64	42	97	767	1137	426	29	19	9
ENSMUSG00000003623	Crot	2996	765	783	797	1178	768	618	746	728	826	838	666	545	720	1026	418	1048	1119	376
ENSMUSG00000003644	Rps6ka1	3876	1628	1653	1416	1098	1074	757	1922	1851	1735	1506	1135	878	1367	2218	963	1265	1324	226
ENSMUSG00000003657	Calb2	1743	0	0	0	0	0	0	3	0	0	1	0	0	0	0	0	0	0	0
ENSMUSG00000003660	Snrnp200	6745	4050	4242	3840	4441	3837	2711	4132	4107	3899	4578	3380	3243	3989	4962	2320	4931	4476	902
ENSMUSG00000003662	Ciao1	3075	553	565	597	662	470	375	686	557	599	618	495	381	544	699	315	665	641	188
ENSMUSG00000003665	Has1	2090	2	2	2	0	0	0	0	1	1	0	0	1	0	2	0	0	0	5
ENSMUSG00000003680	Taf6l	3403	570	627	565	491	522	355	594	590	581	632	499	446	503	735	368	639	595	113
ENSMUSG00000003721	Insig2	3016	430	461	422	528	404	322	396	386	405	453	375	265	382	585	230	548	572	141
ENSMUSG00000003731	Kpna6	5910	1537	1602	1445	1348	1375	1004	1471	1343	1306	1566	1239	852	1417	1970	889	1724	1493	333
ENSMUSG00000003746	Man1a	5306	2218	1936	2060	3230	2996	2418	2238	2053	1963	4419	3467	1524	2022	2608	924	3988	3686	664
ENSMUSG00000003752	Itpkc	3247	230	204	186	179	160	136	247	251	236	248	208	94	203	256	108	208	250	37
ENSMUSG00000003762	Coq8b	2433	246	244	233	290	218	141	250	217	218	289	225	206	263	295	109	253	275	52
ENSMUSG00000003778	Brd8	5496	587	608	599	810	651	515	646	568	601	738	599	435	564	737	343	812	751	201
ENSMUSG00000003779	Kif20a	3796	283	720	477	892	924	685	281	119	276	267	179	163	426	374	355	727	549	291
ENSMUSG00000003808	Farsa	1748	938	1004	947	854	615	545	1056	1061	1012	739	656	540	823	1194	491	940	914	323
ENSMUSG00000003809	Gcdh	2171	245	266	254	319	207	169	292	274	260	252	184	205	244	329	142	320	299	159
ENSMUSG00000003810	Mast2	6367	437	386	293	358	491	359	340	360	300	514	412	196	420	482	207	576	521	76
ENSMUSG00000003812	Dnase2a	1958	1241	1271	1086	1838	1372	1070	1259	1194	1191	2087	1609	1171	1117	1517	735	1918	2045	572
ENSMUSG00000003813	Rad23a	2407	565	606	582	559	547	409	579	540	575	601	416	328	537	705	385	655	606	141
ENSMUSG00000003814	Calr	2184	14716	17494	16342	12011	10987	7971	19019	16938	17701	13459	10286	9746	13138	16875	9554	14325	13304	3248
ENSMUSG00000003824	Syce2	1704	63	103	76	132	122	79	73	42	56	84	65	41	69	72	56	130	133	86
ENSMUSG00000003847	Nfat5	13382	608	642	479	522	533	653	629	526	648	845	816	222	628	775	282	760	711	144
ENSMUSG00000003848	Nob1	1658	165	202	175	235	206	156	170	179	138	253	170	95	157	223	134	244	250	70
ENSMUSG00000003849	Nqo1	1553	150	223	143	110	99	74	100	140	162	143	146	697	122	152	81	109	109	50
ENSMUSG00000003863	Ppfia3	4690	23	9	16	9	9	6	23	16	23	7	6	7	14	13	9	10	11	1
ENSMUSG00000003865	Gys1	3816	938	745	726	200	215	215	836	861	820	347	223	297	941	1262	536	311	272	67
ENSMUSG00000003868	Ruvbl2	2665	326	466	332	528	368	280	347	263	348	434	347	225	363	390	249	573	526	158
ENSMUSG00000003872	Lin7b	735	2	1	2	3	2	2	1	0	0	2	2	1	6	5	1	1	2	3
ENSMUSG00000003873	Bax	511	1013	1215	1048	1086	779	561	1127	1189	1146	1060	798	586	962	1340	627	1028	1113	429
ENSMUSG00000003882	Il7r	3208	2807	2078	2696	5881	4780	4329	952	1030	1106	3878	4389	2629	2606	3739	1373	7500	8838	1425
ENSMUSG00000003923	Tfam	4399	488	474	489	516	361	286	493	524	448	404	301	315	432	589	224	494	434	159
ENSMUSG00000003929	Zfp81	6639	106	139	123	116	127	110	148	95	121	181	162	60	112	159	61	188	193	48
ENSMUSG00000003934	Efnb3	3183	2	4	3	0	0	0	2	0	1	2	0	1	0	0	0	0	4	4
ENSMUSG00000003948	Mmd	3301	188	181	158	485	450	383	119	145	178	567	469	154	170	184	96	575	627	133
ENSMUSG00000003949	Hlf	5852	0	0	0	0	1	0	0	0	0	2	0	0	0	3	0	0	1	4
ENSMUSG00000003955	Fam162a	635	550	581	612	350	219	198	621	692	747	266	230	286	576	808	341	411	307	138
ENSMUSG00000003970	Rpl8	862	7920	8915	7640	10715	7273	5962	8504	9387	7740	9656	7872	4824	7847	9982	4274	10467	10519	4522
ENSMUSG00000003974	Grm3	3049	0	1	0	0	0	0	0	0	0	0	0	0	0	1	0	0	0	8
ENSMUSG00000003992	Ssbp2	3957	31	43	26	67	65	64	35	31	35	103	87	20	35	42	9	68	75	42
ENSMUSG00000004018	Fancl	2794	178	195	127	255	180	147	161	153	144	214	171	86	154	208	88	245	289	131
ENSMUSG00000004031	Brinp2	4167	0	0	0	0	0	0	0	0	0	0	0	0	0	1	0	0	0	3
ENSMUSG00000004032	Gstm5	1065	65	62	51	84	60	46	66	51	65	70	63	56	55	70	21	77	70	14
ENSMUSG00000004035	Gstm7	1601	5	4	0	0	3	2	2	3	2	2	1	4	1	0	0	3	2	3
ENSMUSG00000004038	Gstm3	1311	1	0	0	0	1	1	0	0	0	2	2	1	1	1	1	3	1	0
ENSMUSG00000004040	Stat3	6228	3390	2651	3370	1513	1594	1175	4089	4650	3673	2264	1807	1968	3234	4677	1654	1907	1910	263
ENSMUSG00000004043	Stat5a	4107	569	518	549	419	379	268	599	692	517	442	341	301	541	742	295	439	414	128
ENSMUSG00000004044	Cavin1	3491	52	47	35	111	65	45	40	44	27	66	43	35	47	57	23	65	54	9
ENSMUSG00000004054	Map3k11	3801	1038	977	881	905	940	677	1117	1168	1063	1263	1050	833	1005	1403	536	1187	1157	218
ENSMUSG00000004056	Akt2	5995	936	847	891	1170	860	654	983	1108	860	1158	898	609	928	1220	500	1145	1169	318
ENSMUSG00000004069	Dnaja3	2648	663	745	659	867	580	472	679	618	639	754	560	386	664	849	395	859	890	227
ENSMUSG00000004070	Hmox2	2217	3277	2768	3772	2348	1922	1519	3615	3898	3459	2467	1886	2968	3063	4366	1676	2555	2664	739
ENSMUSG00000004071	Cdip1	4348	235	232	169	286	309	200	222	189	173	386	310	118	242	311	105	386	344	49
ENSMUSG00000004085	Map3k20	8986	607	780	593	1303	1274	967	449	390	424	1140	984	514	650	765	404	1749	1585	320
ENSMUSG00000004096	Cwc15	1527	1941	2008	2211	1703	1339	979	2433	2467	2207	1547	1224	1171	1864	2449	1109	1705	1544	519
ENSMUSG00000004098	Col5a3	6119	2	2	1	0	0	3	1	0	2	2	1	11	3	5	1	0	1	3
ENSMUSG00000004099	Dnmt1	6108	2031	2157	1958	3000	2990	2211	1489	1291	1473	2627	2262	2034	1880	2409	1293	3886	3620	715
ENSMUSG00000004100	Ppan	1670	198	243	196	278	191	165	192	171	146	274	252	118	160	231	121	358	337	78
ENSMUSG00000004105	Angptl2	3339	498	843	429	1586	1720	1138	127	165	129	688	683	666	537	671	367	1974	1798	423
ENSMUSG00000004110	Cacna1e	15251	0	0	2	3	0	2	0	0	6	1	0	0	2	0	0	3	1	12
ENSMUSG00000004113	Cacna1b	9942	30	17	23	25	37	21	20	16	23	17	28	15	38	25	8	72	37	18
ENSMUSG00000004127	Trmt10a	4605	72	98	89	84	75	68	54	42	57	66	77	41	61	77	46	92	82	25
ENSMUSG00000004151	Etv1	7477	49	66	71	95	141	73	78	66	84	120	87	59	67	60	37	116	124	17
ENSMUSG00000004187	Kifc2	3143	12	9	5	32	28	14	11	8	11	37	22	10	12	20	7	42	25	15
ENSMUSG00000004207	Psap	2744	97464	76328	93688	104255	94909	68330	89144	93425	82049	137526	110489	54226	77982	122700	41941	124480	137609	19165
ENSMUSG00000004221	Ikbkg	7741	1670	1899	1784	1578	1157	925	1727	2034	1736	1606	1451	1069	1719	2555	916	1788	1861	441
ENSMUSG00000004231	Pax2	5409	1	0	0	0	0	0	1	0	0	1	0	0	1	0	0	1	0	5
ENSMUSG00000004233	Wars2	4410	73	57	72	103	92	43	90	66	75	142	93	50	70	87	39	98	112	21
ENSMUSG00000004263	Atn1	4504	84	68	55	70	90	95	89	51	70	88	50	42	87	97	36	50	62	7
ENSMUSG00000004264	Phb2	1343	1453	1692	1350	1394	1279	906	1555	1562	1440	1537	1217	766	1362	1924	883	1715	1708	438
ENSMUSG00000004266	Ptpn6	2675	8926	9535	9863	5412	3806	3126	11608	12002	11006	5239	4110	4246	8805	11839	5610	5622	5270	1710
ENSMUSG00000004267	Eno2	3366	139	116	128	202	153	128	87	101	108	143	131	46	135	166	58	217	250	45
ENSMUSG00000004268	Emg1	1034	793	899	739	897	524	431	699	636	713	762	584	462	762	813	415	820	797	418
ENSMUSG00000004270	Lpcat3	2281	671	675	581	492	597	322	695	683	665	527	434	328	616	784	348	567	575	93
ENSMUSG00000004285	Atp6v1f	1063	1779	1877	1737	1978	1416	1083	1699	1532	1604	1772	1278	947	1727	2266	993	2009	2047	886
ENSMUSG00000004296	Il12b	1967	30	142	106	0	0	0	53	33	50	3	0	0	65	34	79	1	3	0
ENSMUSG00000004317	Clcn5	9019	1391	1216	1237	1277	1191	1075	1625	1690	1598	2189	1601	611	1152	1984	738	1688	1737	288
ENSMUSG00000004319	Clcn3	6461	1122	1198	1056	1216	1107	771	1004	971	1036	1142	1038	609	1030	1660	672	1454	1391	282
ENSMUSG00000004328	Hif3a	6710	0	0	0	0	3	0	1	0	0	0	0	0	0	1	1	0	1	7
ENSMUSG00000004341	Gpx6	1340	0	0	0	0	0	0	0	0	0	0	0	0	0	0	0	0	0	0
ENSMUSG00000004344	Gpx5	1674	0	0	0	0	0	0	0	0	0	0	0	0	0	0	0	3	0	0
ENSMUSG00000004347	Pde1c	16115	10	11	34	55	42	111	0	3	5	15	19	4	15	19	9	118	138	23
ENSMUSG00000004356	Utp20	8984	739	942	641	791	783	647	650	642	698	905	771	349	639	1016	452	1183	1104	183
ENSMUSG00000004359	Spic	1813	26	26	24	7	12	10	33	48	32	23	16	3	17	17	13	7	2	0
ENSMUSG00000004360	9330159F19Rik	5094	0	0	0	0	0	0	0	0	0	1	0	0	0	0	0	0	0	0
ENSMUSG00000004364	Cul3	4709	1811	1787	1754	1530	1563	1212	1929	1844	1834	1878	1548	1079	1681	2407	920	1975	1891	433
ENSMUSG00000004366	Sst	599	0	0	0	0	0	0	0	0	0	0	0	0	0	0	0	0	0	0
ENSMUSG00000004371	Il11	2012	0	0	0	0	0	0	0	0	0	0	0	0	0	0	0	0	1	0
ENSMUSG00000004383	Large1	4746	386	391	348	534	472	405	345	339	322	574	503	263	417	560	239	773	750	148
ENSMUSG00000004393	Ddx56	1956	489	566	518	581	422	318	512	469	501	512	414	324	464	579	302	603	594	202
ENSMUSG00000004394	Tmed4	2003	807	868	741	667	774	508	837	722	662	816	636	443	766	1007	438	862	875	147
ENSMUSG00000004415	Col26a1	2787	3	0	0	0	0	0	0	0	0	0	0	0	0	1	0	0	0	2
ENSMUSG00000004446	Bid	2448	707	736	818	656	660	436	505	524	625	404	312	384	644	942	448	797	846	201
ENSMUSG00000004451	Ralb	2569	2038	2085	2161	1727	1385	994	2578	2557	2346	1760	1402	1039	2115	2780	1107	1853	1876	583
ENSMUSG00000004455	Ppp1cc	2384	1335	1244	1223	1636	1265	951	1346	1347	1262	1662	1424	804	1185	1680	713	1657	1760	486
ENSMUSG00000004460	Dnajb11	3236	2836	2920	3064	2515	1961	1345	3311	3176	2963	2201	1782	2063	2717	3414	1584	2635	2612	891
ENSMUSG00000004462	Tbccd1	2702	240	265	217	272	262	185	245	206	237	287	231	179	238	294	118	298	334	71
ENSMUSG00000004473	Clec11a	2978	15	9	7	16	10	8	8	8	15	19	12	8	8	18	2	14	16	4
ENSMUSG00000004500	Zfp324	4315	184	176	190	172	162	109	213	199	215	186	145	127	184	179	114	200	188	22
ENSMUSG00000004508	Gab2	6168	1370	1152	1109	1146	1457	1160	1287	1237	1194	1753	1384	733	1347	1739	697	1936	1729	295
ENSMUSG00000004530	Coro1c	3876	7253	7246	6334	8576	7414	5019	6122	5813	5514	7957	6291	4514	6664	9597	4071	9943	10331	1902
ENSMUSG00000004535	Tax1bp1	3729	5452	5504	6565	4732	4037	3112	6095	5587	6327	4266	3453	2944	5613	7450	3114	5272	5442	1381
ENSMUSG00000004540	Psg17	2100	0	1	0	0	0	0	0	0	0	0	0	0	0	0	0	0	0	1
ENSMUSG00000004542	Psg19	2105	0	0	0	0	0	0	2	0	1	0	1	0	1	0	0	0	0	0
ENSMUSG00000004552	Ctse	2126	6	3	11	8	12	4	9	15	225	28	17	292	7	11	6	15	19	2
ENSMUSG00000004558	Ndrg2	2157	11	4	17	21	21	30	3	3	3	26	16	18	8	6	7	13	18	24
ENSMUSG00000004561	Mettl17	1795	88	81	80	124	74	76	108	93	86	141	97	69	94	99	51	136	114	23
ENSMUSG00000004562	Arhgef40	5970	28	34	15	85	68	34	21	14	12	37	20	17	35	28	12	68	40	19
ENSMUSG00000004565	Pnpla6	4894	261	258	243	311	319	245	234	214	260	357	247	218	215	341	151	334	341	61
ENSMUSG00000004567	Mcoln1	2198	391	421	345	535	500	355	280	364	339	607	494	336	400	491	256	656	703	96
ENSMUSG00000004568	Arhgef18	5393	37	24	38	42	45	40	31	37	9	53	43	12	64	47	19	92	58	15
ENSMUSG00000004591	Pkn2	6207	1162	1103	1185	1020	899	702	1402	1236	1204	1257	889	705	1071	1597	628	1239	1244	277
ENSMUSG00000004609	Cd33	6085	814	715	582	1013	1074	621	901	638	656	1242	934	238	749	954	383	968	1047	154
ENSMUSG00000004610	Etfb	662	536	673	512	690	423	325	481	463	432	451	374	304	528	560	305	620	648	337
ENSMUSG00000004612	Nkg7	881	0	0	0	0	0	0	0	0	0	0	0	0	0	0	0	0	0	2
ENSMUSG00000004613	Lim2	884	0	0	0	0	0	0	0	0	0	0	0	0	0	0	0	0	0	0
ENSMUSG00000004626	Stxbp2	2947	2468	2382	2272	2147	1724	1350	2616	2753	2565	2325	1824	1453	2388	3132	1440	2357	2385	650
ENSMUSG00000004630	Pcp2	1675	0	1	0	0	2	0	0	0	0	0	0	0	1	0	0	1	0	0
ENSMUSG00000004631	Sgce	1878	1	3	0	2	0	0	4	3	1	0	1	0	0	1	1	2	2	1
ENSMUSG00000004633	Chn2	5026	31	41	16	134	136	73	47	37	34	142	125	68	23	26	15	141	180	24
ENSMUSG00000004637	Wwox	5368	167	221	159	232	186	125	156	121	153	252	134	97	179	187	85	246	232	63
ENSMUSG00000004642	Slbp	2760	465	467	510	678	480	314	449	391	462	512	437	303	397	561	245	629	663	218
ENSMUSG00000004651	Tyr	6042	0	0	0	0	2	0	0	0	0	0	0	0	0	2	0	1	0	6
ENSMUSG00000004654	Ghrhr	1561	0	0	0	0	0	0	0	0	0	0	0	0	1	2	0	0	0	0
ENSMUSG00000004655	Aqp1	2627	12	10	0	15	9	3	4	1	1	10	7	3	9	3	3	7	1	5
ENSMUSG00000004661	Arid3b	4667	138	115	98	84	109	72	154	126	93	117	92	61	154	170	75	124	134	38
ENSMUSG00000004665	Cnn2	2460	238	292	250	137	109	94	283	278	258	154	126	171	330	333	147	227	167	55
ENSMUSG00000004667	Polr2e	1148	447	565	467	828	481	421	426	429	437	661	554	260	472	577	275	669	767	305
ENSMUSG00000004668	Abca13	16092	2	6	6	12	14	13	3	9	3	4	14	5	15	9	4	13	8	20
ENSMUSG00000004677	Myo9b	7406	4016	3735	3455	4254	3578	2918	4048	4385	3840	5384	4424	2816	3773	5350	2181	5036	5067	830
ENSMUSG00000004698	Hdac9	11057	149	199	107	301	329	156	322	236	337	246	192	166	169	175	79	336	299	77
ENSMUSG00000004707	Ly9	2738	3245	3978	3236	2213	2324	1452	3004	2668	2808	2800	2025	1700	2936	3726	2089	2709	2379	445
ENSMUSG00000004709	Cd244	3760	74	60	60	95	79	40	73	33	30	42	35	16	37	97	12	111	77	31
ENSMUSG00000004730	Adgre1	3245	51667	47395	55450	28435	16555	15426	62303	67608	66909	29160	23507	10098	44137	67938	28154	28148	31038	8528
ENSMUSG00000004748	Mtfp1	1411	3	1	0	6	3	5	3	0	4	3	1	4	2	2	0	12	1	2
ENSMUSG00000004768	Rab23	4500	75	77	53	67	89	49	74	66	62	74	70	34	71	78	46	104	90	18
ENSMUSG00000004771	Rab11a	2191	1965	1766	1931	1820	1326	1107	2294	2099	2078	1828	1485	1117	1789	2432	933	2061	1958	573
ENSMUSG00000004788	Eif2b2	1605	532	486	450	506	393	265	503	446	414	346	337	374	492	569	287	444	525	184
ENSMUSG00000004789	Dlst	2764	1914	2051	1691	2000	1475	1169	1841	1996	1837	1928	1577	1069	1793	2393	1036	2147	2168	546
ENSMUSG00000004791	Pgf	2080	0	2	5	0	0	0	2	2	1	1	0	3	2	4	0	1	0	5
ENSMUSG00000004798	Ulk2	5743	634	696	562	1213	1096	842	676	606	644	1521	1200	396	550	940	359	1419	1318	272
ENSMUSG00000004814	Ccl24	1295	34	26	43	4	5	7	76	56	52	60	24	35	32	59	11	13	19	3
ENSMUSG00000004815	Dgkq	4938	377	336	380	421	298	258	410	409	440	491	418	300	366	572	173	579	476	103
ENSMUSG00000004821	Tmed11	763	0	0	0	0	0	0	0	0	0	0	0	0	0	0	0	0	1	0
ENSMUSG00000004837	Grap	1662	148	183	207	161	92	65	319	269	277	262	146	102	195	167	114	160	118	45
ENSMUSG00000004842	Pou1f1	1982	1	0	0	0	0	0	0	0	0	1	0	0	1	0	0	0	0	1
ENSMUSG00000004843	Chmp2b	1838	1210	1076	1033	1256	1021	767	1138	1135	1053	1236	971	636	1115	1503	545	1323	1278	313
ENSMUSG00000004846	Plod3	3257	2490	1774	2979	1307	1157	968	3177	3784	3214	1835	1482	3056	2262	3518	1274	1714	1658	330
ENSMUSG00000004849	Ap1s1	2103	1582	1669	1561	1499	1192	909	1471	1561	1339	1349	1130	1017	1450	1896	909	1735	1557	443
ENSMUSG00000004864	Mapk13	1392	1	1	2	0	0	0	0	1	1	2	1	0	1	1	0	0	1	0
ENSMUSG00000004865	Srpk1	4776	1016	1032	925	1132	945	761	921	1033	985	1166	997	669	947	1292	514	1333	1325	278
ENSMUSG00000004872	Pax3	3866	0	3	0	0	0	1	0	0	1	0	0	0	0	0	0	0	2	1
ENSMUSG00000004880	Lbr	3851	796	943	758	1439	1293	819	939	929	967	1352	1031	600	772	960	470	1387	1316	390
ENSMUSG00000004885	Crabp2	931	0	1	0	0	0	0	0	0	1	1	0	0	0	0	0	0	0	0
ENSMUSG00000004891	Nes	6126	231	304	483	453	469	585	140	101	184	219	234	200	463	319	214	1163	684	157
ENSMUSG00000004892	Bcan	3187	0	0	1	0	0	0	0	0	0	0	0	0	1	0	0	2	0	0
ENSMUSG00000004894	Hapln2	1711	0	0	0	0	0	0	0	0	0	0	0	0	0	0	0	1	0	0
ENSMUSG00000004895	Prcc	2099	319	292	329	337	355	240	281	340	322	342	334	225	338	425	199	405	417	73
ENSMUSG00000004896	Rrnad1	3141	139	120	108	119	101	86	140	121	142	153	125	92	129	209	68	186	141	39
ENSMUSG00000004897	Hdgf	2561	2583	3174	2430	1956	2331	1626	2532	2649	2459	2234	1884	1213	2656	3334	1611	2475	2193	374
ENSMUSG00000004902	Slc25a18	1911	9	10	9	2	1	1	19	19	15	1	1	1	9	11	7	4	0	0
ENSMUSG00000004929	Thop1	2832	220	265	182	317	209	231	180	204	197	234	209	160	218	266	121	328	334	102
ENSMUSG00000004931	Apba3	2201	298	291	262	272	235	171	334	302	320	348	278	227	357	391	164	270	315	69
ENSMUSG00000004933	Matk	2852	69	60	66	157	103	149	33	56	51	148	146	112	55	107	32	225	237	73
ENSMUSG00000004934	Pias4	2598	304	331	322	297	280	219	299	292	291	284	262	220	347	395	143	310	318	58
ENSMUSG00000004936	Map2k1	2436	4690	3761	5073	2289	1899	1725	4711	5922	5326	2572	2225	2974	4868	6337	2310	2897	2911	630
ENSMUSG00000004937	Sgta	2191	930	943	893	890	832	586	946	925	830	902	720	697	946	1218	555	1070	958	167
ENSMUSG00000004939	Nmrk2	1854	0	0	0	0	0	0	1	0	2	1	0	0	0	0	0	0	0	5
ENSMUSG00000004945	Tmem242	1837	1002	951	861	1216	735	548	833	796	814	857	712	634	926	1010	419	1072	1080	476
ENSMUSG00000004947	Dtx2	2734	461	375	498	72	110	86	756	939	649	139	103	99	406	772	288	113	88	10
ENSMUSG00000004948	Zp3	1323	0	4	0	0	0	0	0	0	0	0	0	0	0	1	0	0	0	0
ENSMUSG00000004951	Hspb1	1031	1	1	1	0	0	0	2	0	0	0	0	0	0	1	0	0	0	2
ENSMUSG00000004952	Rasa4	2778	3644	2812	3460	1277	1393	1079	4256	4516	3790	2348	1656	1998	3414	5051	1651	1851	1582	255
ENSMUSG00000004961	Syt5	2380	2	0	1	0	0	0	1	0	0	1	0	0	0	1	1	0	1	0
ENSMUSG00000004980	Hnrnpa2b1	2434	8562	8647	8782	9915	7641	5411	9151	9002	8696	8322	6743	4292	7288	9734	3950	9273	9037	2823
ENSMUSG00000004988	Fxyd4	1663	0	0	0	0	0	0	0	0	0	1	0	0	0	1	0	0	0	4
ENSMUSG00000004994	Ccdc130	2119	93	98	97	98	97	67	110	109	110	118	112	71	100	124	71	106	110	18
ENSMUSG00000004996	Mri1	2819	154	122	106	231	141	91	130	74	105	201	108	69	103	168	90	167	202	60
ENSMUSG00000005034	Prkacb	5377	2101	2321	2019	3008	2883	2116	2243	1919	2067	3047	2430	1309	1971	2663	1116	3566	3324	555
ENSMUSG00000005043	Sgsh	4357	294	245	204	868	880	600	149	142	215	865	638	203	225	369	174	937	996	137
ENSMUSG00000005045	Chd5	9486	3	3	7	5	4	9	3	6	5	10	7	11	7	8	2	7	14	6
ENSMUSG00000005054	Cstb	603	7213	7399	6970	4795	4778	3551	6636	6691	6477	4835	4138	4486	6478	9209	3975	6295	6204	1623
ENSMUSG00000005057	Sh2b2	3319	250	263	145	186	281	225	198	134	131	322	257	102	242	337	125	276	293	52
ENSMUSG00000005069	Pex5	3282	1189	1115	1045	1339	905	768	1193	1465	1202	1172	1018	513	1179	1547	527	1289	1376	350
ENSMUSG00000005078	Jkamp	1977	434	450	445	442	349	264	380	371	407	401	317	200	379	574	229	496	511	120
ENSMUSG00000005087	Cd44	5654	7475	8003	6122	7592	8685	6898	7060	6991	6429	10129	7983	4670	7448	9849	4353	11077	10667	1660
ENSMUSG00000005089	Slc1a2	12192	0	7	11	1	1	1	17	22	13	10	7	4	8	2	5	5	4	10
ENSMUSG00000005102	Eif2ak4	7260	300	393	268	545	534	428	243	178	186	491	385	191	323	353	192	696	660	116
ENSMUSG00000005103	Wdr1	3089	17875	17397	16951	12001	9975	7732	19390	20614	18301	12579	11245	7658	15969	23360	9411	15032	14307	2817
ENSMUSG00000005107	Slc2a9	4067	462	481	418	486	452	318	482	574	548	443	391	253	442	631	255	530	561	140
ENSMUSG00000005124	Wisp1	5097	0	0	0	0	1	2	0	0	0	0	0	0	0	0	0	1	0	3
ENSMUSG00000005125	Ndrg1	3203	480	451	468	622	704	399	381	264	382	453	387	250	554	687	310	867	853	128
ENSMUSG00000005131	4930550C14Rik	3051	1	1	2	7	4	2	1	2	1	1	0	0	1	0	2	4	1	1
ENSMUSG00000005142	Man2b1	3822	9754	8706	9421	10232	11090	8472	10905	12747	11251	17653	15089	7551	8918	13609	4322	14510	14488	2038
ENSMUSG00000005148	Klf5	1721	1	0	1	0	2	0	0	0	0	2	0	0	0	0	2	0	1	0
ENSMUSG00000005150	Wdr83	1297	189	198	222	210	144	130	177	236	211	196	159	198	203	258	117	223	198	60
ENSMUSG00000005161	Prdx2	1997	3828	2974	3176	3434	1889	1584	4289	3325	2984	2651	1716	1596	2954	4510	1886	2606	3113	1616
ENSMUSG00000005198	Polr2a	6740	481	476	376	626	538	852	434	446	535	626	632	369	488	550	208	875	693	303
ENSMUSG00000005202	Shbg	1419	6	7	5	0	0	0	7	5	1	1	0	0	2	7	1	0	0	4
ENSMUSG00000005204	Senp3	2409	1011	1040	1041	1034	922	665	1066	1130	1033	1183	910	748	967	1229	544	1274	1216	246
ENSMUSG00000005220	Corin	4966	0	1	0	0	0	1	0	1	1	1	0	0	0	0	0	1	0	3
ENSMUSG00000005225	Plekha8	7005	493	490	464	275	250	219	525	488	481	377	288	190	470	602	261	338	346	67
ENSMUSG00000005232	G6pc2	1892	0	0	0	0	0	0	0	0	0	0	0	0	0	0	0	0	0	3
ENSMUSG00000005233	Spc25	1621	98	205	128	384	393	272	69	47	60	135	111	36	142	107	71	355	301	169
ENSMUSG00000005237	Dnah2	13950	5	5	6	4	1	4	2	3	5	10	9	1	2	5	2	6	5	16
ENSMUSG00000005251	Ripk4	3953	0	0	0	0	0	0	2	0	0	0	0	0	0	0	0	0	1	3
ENSMUSG00000005262	Ufd1	2874	790	827	727	669	520	372	821	787	799	612	587	429	743	902	387	699	639	209
ENSMUSG00000005267	Zfp287	6142	91	117	112	74	70	54	121	101	109	92	90	70	100	137	77	107	89	21
ENSMUSG00000005268	Prlr	13442	0	0	0	1	2	0	2	0	2	1	0	0	0	4	0	2	3	13
ENSMUSG00000005299	Letm1	7425	809	736	740	848	644	569	755	760	685	769	581	558	770	1042	396	927	901	277
ENSMUSG00000005312	Ubqln1	3686	1887	1995	1837	1615	1512	1255	2131	2188	1942	1920	1617	1112	1870	2580	1119	2160	1939	360
ENSMUSG00000005320	Fgfr4	3324	0	0	0	0	1	0	0	0	0	0	0	0	1	1	0	0	1	0
ENSMUSG00000005338	Cadm3	1375	1	0	0	0	0	0	0	0	0	0	0	0	0	0	0	0	0	0
ENSMUSG00000005339	Fcer1a	998	0	0	0	0	0	0	0	0	0	0	0	0	0	0	0	0	0	0
ENSMUSG00000005354	Txn2	4208	670	716	584	560	587	426	575	551	564	669	524	373	515	765	376	660	712	105
ENSMUSG00000005355	Casp14	2394	0	0	0	0	0	0	2	0	0	0	0	0	0	0	0	1	1	0
ENSMUSG00000005357	Slc1a6	2152	0	0	3	0	0	0	0	0	0	0	0	0	2	0	0	0	0	0
ENSMUSG00000005360	Slc1a3	4404	0	0	0	0	1	0	0	1	0	1	1	0	2	0	1	0	0	3
ENSMUSG00000005362	Crbn	2171	1072	1260	1245	997	713	623	1601	1435	1454	980	793	529	1144	1415	611	1018	1167	335
ENSMUSG00000005364	Il5ra	3575	2	0	0	0	1	0	1	1	0	0	1	0	0	1	0	2	1	5
ENSMUSG00000005370	Msh6	4254	398	514	432	747	570	487	278	263	349	655	538	244	379	470	269	886	764	212
ENSMUSG00000005371	Fbxo11	4019	490	462	393	578	464	607	525	456	520	752	676	304	492	644	226	762	669	213
ENSMUSG00000005373	Mlxipl	4016	0	1	0	1	1	0	0	1	0	0	0	1	0	0	0	0	1	6
ENSMUSG00000005374	Tbl2	7705	262	310	235	220	268	197	214	211	238	278	185	125	275	292	139	304	287	90
ENSMUSG00000005378	Wbscr22	2034	271	290	242	273	229	186	248	242	262	288	198	193	212	306	152	295	282	94
ENSMUSG00000005397	Nid1	6091	1	0	0	0	2	2	0	1	2	0	1	3	0	1	0	2	1	0
ENSMUSG00000005410	Mcm5	3457	517	795	642	1220	1015	810	277	207	331	727	717	536	534	539	456	1481	1366	424
ENSMUSG00000005413	Hmox1	1569	18033	20148	17096	4380	3925	3076	16287	19171	16265	5276	4756	5332	17151	23947	10950	5410	5884	981
ENSMUSG00000005417	Mprip	12942	1017	981	874	1368	1325	963	1008	1005	932	1592	1200	882	1011	1313	526	1631	1500	323
ENSMUSG00000005442	Cic	9123	1391	1146	1093	900	1336	1077	1324	1194	1133	1386	1283	833	1294	1942	686	1565	1281	179
ENSMUSG00000005447	Pafah1b3	1459	274	335	340	261	254	146	311	269	251	209	186	163	279	328	178	259	292	117
ENSMUSG00000005465	Il27ra	2664	7	8	10	8	7	4	20	10	6	8	6	11	14	21	9	5	12	4
ENSMUSG00000005469	Prkaca	2488	936	804	746	764	956	622	856	851	849	986	813	599	715	1068	446	931	971	155
ENSMUSG00000005470	Asf1b	1788	139	231	166	260	409	278	100	91	134	169	160	81	171	158	142	361	310	77
ENSMUSG00000005474	Myl10	1018	1	1	0	0	2	0	0	0	0	0	0	0	0	1	0	0	4	3
ENSMUSG00000005481	Ddx39	4370	956	1246	1081	1004	711	571	1058	1226	1087	729	689	645	1031	1299	595	1044	969	389
ENSMUSG00000005483	Dnajb1	3204	494	524	566	465	473	341	576	569	539	587	512	353	487	698	324	628	550	159
ENSMUSG00000005493	Msh4	3701	5	9	8	4	2	6	3	10	7	11	12	3	6	12	7	8	11	7
ENSMUSG00000005501	Usp40	5316	433	431	436	429	320	246	463	367	460	510	410	275	425	614	208	486	488	136
ENSMUSG00000005503	Evx1	2877	0	0	0	0	0	0	0	0	0	1	0	0	1	0	0	0	0	0
ENSMUSG00000005505	Kbtbd4	2440	369	362	380	436	334	247	372	406	344	380	296	343	344	440	200	450	428	89
ENSMUSG00000005506	Celf1	8102	1400	1344	1235	1238	1142	790	1464	1357	1350	1446	1321	873	1384	1946	720	1549	1519	315
ENSMUSG00000005510	Ndufs3	1046	490	482	464	461	389	267	620	526	529	471	359	346	451	579	262	498	453	129
ENSMUSG00000005514	Por	3203	3002	2782	2976	3360	3406	2489	2408	2342	2268	3137	2949	1906	2901	3994	1722	4536	4650	764
ENSMUSG00000005533	Igf1r	11409	97	60	71	105	157	144	25	81	54	176	204	29	87	86	54	190	160	25
ENSMUSG00000005534	Insr	9391	463	419	381	528	515	428	487	484	519	805	646	260	397	610	216	697	693	150
ENSMUSG00000005540	Fcer2a	2359	0	0	0	0	0	1	1	0	1	0	0	0	2	0	0	0	0	1
ENSMUSG00000005547	Cyp2a5	2033	0	0	0	0	1	0	0	0	0	0	0	0	0	0	0	0	0	0
ENSMUSG00000005553	Atp4a	3497	1	0	0	1	0	0	1	1	0	0	0	3	0	1	0	0	0	1
ENSMUSG00000005566	Trim28	3245	1468	1585	1199	1806	1639	1249	1347	1344	1283	1906	1663	816	1250	1774	836	2062	1831	482
ENSMUSG00000005575	Ube2m	1745	1370	1504	1346	1157	1063	738	1334	1338	1232	1179	958	636	1208	1571	759	1374	1393	430
ENSMUSG00000005580	Adcy9	5197	442	418	360	595	486	369	400	334	403	612	478	249	377	612	220	728	716	83
ENSMUSG00000005583	Mef2c	8018	1540	1308	1443	1977	2040	1734	1254	1360	1373	2511	2085	859	1350	2080	659	2881	2752	533
ENSMUSG00000005609	Ctr9	4300	601	645	590	673	538	394	666	645	733	676	554	403	538	787	390	749	743	230
ENSMUSG00000005610	Eif4g2	8812	15891	18236	14232	10625	11549	8732	20273	19642	17763	13093	11295	4643	15816	20535	8774	14416	13850	2537
ENSMUSG00000005611	Mrvi1	6408	0	3	2	6	3	2	3	1	4	6	6	0	4	1	6	6	4	5
ENSMUSG00000005615	Pcyt1a	5199	3649	3510	3810	5452	5157	3495	2714	2612	2618	5193	4174	2728	3344	4800	1841	6770	6532	1001
ENSMUSG00000005621	Zfp592	7297	373	326	373	285	367	280	402	445	351	539	368	212	386	569	231	426	467	70
ENSMUSG00000005625	Psmd4	1838	1679	1884	1835	1759	1114	983	1898	1996	1799	1386	1206	1141	1803	2042	1023	1649	1707	604
ENSMUSG00000005628	Tmod4	1373	3	1	0	2	1	3	0	0	2	0	0	0	0	0	0	2	2	0
ENSMUSG00000005640	Insrr	5102	0	0	1	0	0	0	1	1	0	2	0	0	0	0	0	0	0	3
ENSMUSG00000005649	Cabp5	2526	1	0	0	0	0	0	1	0	0	0	3	0	0	1	0	0	0	1
ENSMUSG00000005656	Snx6	1928	1550	1582	1651	1351	1019	819	1705	1706	1723	1463	1017	880	1416	1923	820	1355	1502	382
ENSMUSG00000005667	Mthfd2	2279	652	750	850	354	413	269	980	1021	955	273	195	279	718	836	433	342	298	93
ENSMUSG00000005672	Kit	5253	1	2	4	0	3	2	0	2	2	1	0	1	1	0	0	2	0	4
ENSMUSG00000005674	Tomm40l	4743	481	548	411	699	577	405	427	403	440	557	427	297	446	577	247	722	737	253
ENSMUSG00000005677	Nr1i3	3270	1	0	1	4	2	0	1	0	1	0	2	0	0	0	1	2	0	0
ENSMUSG00000005681	Apoa2	537	4	1	2	4	1	4	0	3	0	3	2	0	2	3	1	7	9	0
ENSMUSG00000005682	Pan2	4445	149	102	97	151	149	104	158	111	122	178	129	73	111	176	83	175	160	24
ENSMUSG00000005683	Cs	2926	3292	3769	3107	2797	2685	1979	3332	3257	3250	3120	2412	1969	3201	4193	2097	3399	3010	640
ENSMUSG00000005686	Ampd3	4646	750	967	589	426	540	451	835	797	775	936	755	438	835	979	407	741	617	131
ENSMUSG00000005687	Bcas2	1467	518	521	516	785	605	454	429	491	490	671	533	291	515	637	274	782	783	280
ENSMUSG00000005696	Sh2d1a	1523	0	0	0	0	0	0	0	0	0	0	0	0	0	0	0	0	0	0
ENSMUSG00000005698	Ctcf	3782	837	812	799	958	958	718	1057	992	1011	1032	900	586	767	1167	443	1139	1097	241
ENSMUSG00000005699	Pard6a	1433	77	69	63	105	57	52	51	53	53	68	54	67	60	49	40	84	78	63
ENSMUSG00000005705	Agrp	899	1	0	2	0	2	0	1	0	0	0	0	0	1	0	2	0	0	0
ENSMUSG00000005716	Pvalb	1041	0	0	0	0	0	0	0	0	0	0	0	0	0	1	0	0	0	0
ENSMUSG00000005718	Tfap4	2113	32	52	25	61	57	49	18	10	23	69	66	12	23	20	19	82	58	21
ENSMUSG00000005732	Ranbp1	1126	923	1044	863	731	942	623	894	858	818	876	769	493	865	1054	563	1108	1143	223
ENSMUSG00000005763	Cd247	4558	19	32	32	1	3	0	35	39	32	3	6	1	33	32	29	2	2	0
ENSMUSG00000005774	Rfx5	5108	230	210	204	88	134	89	297	310	299	170	107	137	233	282	104	138	114	44
ENSMUSG00000005779	Psmb4	1183	3557	3925	3873	3388	2053	1572	3858	3856	3816	2286	1866	2172	3483	4164	1914	2944	3103	1759
ENSMUSG00000005800	Mmp8	2425	214	225	343	435	325	365	340	400	406	792	757	595	203	393	153	580	725	120
ENSMUSG00000005802	Slc30a4	5482	574	598	515	700	650	524	371	366	400	676	568	206	638	794	280	972	887	146
ENSMUSG00000005803	Sqor	2559	1093	1251	1047	974	699	567	1250	1240	1387	1074	759	558	1053	1335	650	945	931	230
ENSMUSG00000005804	Bloc1s6	3484	723	669	807	634	512	431	889	966	864	703	641	618	646	878	357	828	861	210
ENSMUSG00000005813	Metap1	6027	1622	1634	1569	1157	847	663	1716	2139	2017	1062	1036	878	1489	2115	857	1300	1320	366
ENSMUSG00000005823	Gpr108	2095	817	738	854	797	721	554	839	927	883	907	688	657	846	1039	510	898	917	225
ENSMUSG00000005824	Tnfsf14	1859	25	13	15	23	24	13	17	16	15	30	20	5	25	14	11	21	35	9
ENSMUSG00000005836	Gata6	3194	0	0	0	0	0	1	0	0	0	0	0	0	0	0	1	0	2	0
ENSMUSG00000005846	Rsl1d1	1945	815	1052	767	858	908	730	918	789	838	988	831	507	747	1028	522	1248	1203	331
ENSMUSG00000005864	Cnga2	3064	0	0	0	0	0	0	0	0	0	0	0	0	0	0	0	0	0	1
ENSMUSG00000005871	Apc	12850	965	933	801	922	1175	931	974	770	890	1483	1188	569	888	1172	545	1408	1333	193
ENSMUSG00000005873	Reep5	2894	3460	3597	3314	2997	2703	2295	3427	3242	3310	3516	2768	1862	3174	4587	1946	3793	3556	872
ENSMUSG00000005881	Ergic3	1446	1373	1226	1316	1439	1265	921	1271	1259	1313	1503	1224	911	1261	1771	652	1677	1771	402
ENSMUSG00000005882	Uqcc1	2747	414	476	457	497	321	255	390	470	375	337	334	183	364	530	253	456	459	146
ENSMUSG00000005883	Spo11	1755	0	1	0	0	0	0	0	0	0	0	0	0	0	0	0	0	0	0
ENSMUSG00000005886	Ncoa2	8584	811	785	662	681	910	615	911	872	870	1101	929	514	728	1103	416	1113	1020	232
ENSMUSG00000005891	Prl4a1	876	0	0	0	0	0	0	0	0	0	0	0	0	0	0	0	1	0	0
ENSMUSG00000005892	Trh	1384	0	1	0	0	1	0	0	0	0	0	0	0	0	0	0	0	0	0
ENSMUSG00000005893	Nr2c2	9085	807	876	644	1062	969	815	872	754	848	1299	1108	427	764	997	432	1153	1208	219
ENSMUSG00000005897	Nr2c1	4607	201	170	185	190	194	130	203	171	184	286	192	151	203	267	90	285	254	43
ENSMUSG00000005899	Smpd4	4926	250	278	244	234	294	213	248	248	279	336	255	167	269	354	125	340	287	56
ENSMUSG00000005907	Pex1	4555	200	203	151	255	207	163	173	175	177	281	185	137	215	240	107	268	324	89
ENSMUSG00000005917	Otx1	2933	0	0	0	0	0	0	0	0	0	0	0	0	0	1	2	0	0	4
ENSMUSG00000005936	Kctd20	4379	1289	1258	1274	1350	1067	807	1324	1372	1324	1403	1133	732	1216	1626	706	1465	1392	356
ENSMUSG00000005947	Itgae	4581	0	1	1	0	3	0	4	2	3	1	2	6	0	3	0	2	2	5
ENSMUSG00000005949	Ctns	2724	285	312	250	434	520	365	317	248	295	679	446	275	312	417	197	554	584	106
ENSMUSG00000005950	P2rx5	2395	5	7	3	1	2	0	2	3	3	2	0	0	2	10	2	3	1	3
ENSMUSG00000005951	Shpk	2808	88	77	68	89	76	51	93	72	72	72	48	30	76	92	44	89	93	20
ENSMUSG00000005952	Trpv1	3560	0	1	0	0	0	0	0	0	1	2	1	0	1	0	0	0	1	0
ENSMUSG00000005958	Ephb3	4185	1	0	2	1	0	2	2	0	0	0	2	1	2	1	0	1	1	4
ENSMUSG00000005968	Tuft1	2632	119	108	115	179	129	96	125	96	93	127	116	85	103	155	65	162	171	46
ENSMUSG00000005973	Rcn1	2720	75	88	106	44	32	23	111	127	66	45	45	36	63	110	45	40	39	10
ENSMUSG00000005980	Dnase1	1508	0	0	0	0	0	0	0	0	0	0	0	0	0	0	0	0	0	0
ENSMUSG00000005981	Trap1	2320	774	950	871	937	689	603	769	751	792	851	625	572	757	951	519	1036	917	322
ENSMUSG00000005982	Naa60	2358	455	448	365	401	565	368	474	385	477	631	508	247	440	618	289	532	497	76
ENSMUSG00000005983	1700037C18Rik	2819	31	40	30	37	22	19	24	20	16	26	20	29	33	28	18	30	26	13
ENSMUSG00000005986	Ankrd13d	2139	111	121	137	112	99	52	128	93	145	136	87	68	90	126	49	119	114	24
ENSMUSG00000005994	Tyrp1	2828	0	0	0	0	0	0	0	0	0	0	0	0	0	0	0	0	0	1
ENSMUSG00000006005	Tpr	7773	4816	5056	4599	4369	4664	3555	5923	4704	5502	5688	4233	2921	4856	6216	2732	5853	5301	993
ENSMUSG00000006007	Pdc	3350	0	0	0	0	0	0	0	0	0	0	0	0	1	0	0	0	0	0
ENSMUSG00000006010	BC003331	3359	1176	1239	1270	1415	935	748	1333	1110	1249	1164	939	722	1236	1621	691	1363	1364	434
ENSMUSG00000006014	Prg4	4280	1	1	0	0	0	0	0	0	0	0	1	1	0	0	0	2	1	2
ENSMUSG00000006019	Dhx34	4432	302	343	304	462	381	284	247	325	178	441	325	197	373	478	181	534	503	87
ENSMUSG00000006021	Kptn	1630	93	81	89	133	73	63	96	107	130	87	64	89	82	122	49	138	130	40
ENSMUSG00000006024	Napa	2517	1446	1528	1321	1294	1449	968	1332	1405	1359	1439	1156	872	1448	2022	879	1792	1631	280
ENSMUSG00000006050	Sra1	4384	1293	1245	1183	1072	657	585	1357	1310	1273	1087	783	717	1243	1474	696	1044	1063	439
ENSMUSG00000006056	Calcoco2	1621	0	0	0	0	0	0	1	4	0	0	1	0	0	2	0	0	0	4
ENSMUSG00000006057	Atp5g1	4912	484	567	485	517	391	291	511	473	438	475	389	296	404	626	352	496	520	164
ENSMUSG00000006058	Snf8	1004	845	927	874	707	511	437	862	1077	972	626	503	564	830	1048	512	719	675	316
ENSMUSG00000006095	Tbcb	1416	1399	1723	1583	1601	992	793	1541	1552	1662	1112	979	957	1372	1876	816	1438	1519	582
ENSMUSG00000006127	Inpp5k	2691	837	748	790	744	672	450	982	974	859	1089	706	603	781	1099	407	829	786	177
ENSMUSG00000006134	Crkl	3863	779	697	820	563	726	467	906	1036	926	785	634	492	768	1009	471	861	807	86
ENSMUSG00000006143	Upk3bl	1121	1	0	0	0	0	0	0	0	0	0	0	0	0	0	0	0	1	0
ENSMUSG00000006154	Eps8l1	4844	1	36	16	0	49	17	0	1	0	0	1	0	21	42	8	61	48	7
ENSMUSG00000006169	Clint1	3365	1805	1561	1795	1362	1306	912	2146	2254	1917	1565	1306	1148	1556	2314	978	1604	1551	279
ENSMUSG00000006179	Prss16	2295	10	25	6	28	31	17	6	5	8	11	3	11	14	14	9	24	31	1
ENSMUSG00000006191	Cdkal1	5224	243	241	213	227	257	215	192	249	283	304	292	161	194	295	138	334	333	55
ENSMUSG00000006200	Rhox6	1010	0	0	0	0	0	0	0	0	0	0	0	0	0	0	0	0	0	0
ENSMUSG00000006204	5430419D17Rik	8572	0	1	0	1	0	1	0	0	0	0	0	0	1	1	0	2	2	9
ENSMUSG00000006205	Htra1	2041	92	58	93	8	6	4	102	132	117	18	19	34	66	84	42	14	14	8
ENSMUSG00000006215	Zbtb17	2722	410	486	341	478	373	293	390	413	347	487	354	247	433	495	195	494	448	104
ENSMUSG00000006216	Clcnkb	2490	1	2	9	1	0	1	1	0	0	1	3	3	0	2	1	1	2	1
ENSMUSG00000006218	Fam131c	1433	0	0	0	0	0	0	0	0	0	0	0	0	0	0	0	0	0	0
ENSMUSG00000006219	Fblim1	3964	542	440	398	690	735	548	330	289	272	645	536	339	419	594	242	881	888	104
ENSMUSG00000006221	Hspb7	2769	2	0	0	2	1	1	3	2	0	0	3	1	2	3	0	3	2	0
ENSMUSG00000006235	Epor	1989	0	0	0	0	1	1	0	0	0	2	2	0	0	0	0	0	0	6
ENSMUSG00000006241	Ccdc159	1712	17	19	13	23	11	4	24	10	21	16	12	16	15	14	8	24	25	3
ENSMUSG00000006262	Mob1b	8967	1112	937	938	675	714	551	1066	870	1002	945	882	382	1021	1362	458	1044	867	165
ENSMUSG00000006269	Atp6v1b1	3431	0	0	0	0	0	0	0	0	0	0	0	0	0	0	0	1	0	4
ENSMUSG00000006270	Vax1	1044	0	0	0	0	0	0	0	0	0	0	0	0	0	0	0	0	0	0
ENSMUSG00000006273	Atp6v1b2	2825	10029	8815	9344	8663	7642	5525	8449	8808	7562	8540	7568	6079	8583	13262	4932	11298	11282	1863
ENSMUSG00000006276	Eps15l1	4702	801	770	746	761	632	527	1016	973	900	939	738	474	793	1079	457	914	917	239
ENSMUSG00000006281	Tep1	8168	2293	2007	2277	2017	1678	1366	2197	2156	2242	2037	1611	1575	2054	2960	1165	2185	2072	562
ENSMUSG00000006288	Ttc5	1841	431	444	432	698	500	382	390	392	401	450	431	352	394	533	230	636	673	291
ENSMUSG00000006289	Osgep	3544	410	390	387	520	328	248	379	438	398	440	327	371	342	500	179	450	488	196
ENSMUSG00000006299	Aamp	2068	2115	2295	2075	2855	1735	1332	2043	2296	2120	2316	1912	1053	1827	2542	1113	2488	2601	1078
ENSMUSG00000006301	Tmbim1	11315	1168	1327	1021	1501	1177	944	970	934	853	1902	1563	763	1055	1385	572	1651	1809	371
ENSMUSG00000006304	Arpc2	2033	11618	11612	12059	9240	8517	6677	12639	12721	12191	9583	7616	6888	11451	15158	6633	11762	10781	2591
ENSMUSG00000006307	Kmt2b	8481	280	206	201	203	261	211	323	308	261	395	266	188	252	367	141	291	263	58
ENSMUSG00000006310	Zbtb32	1865	2	1	5	2	3	2	1	1	12	1	0	5	4	7	1	4	1	8
ENSMUSG00000006311	Etv2	1048	0	0	0	0	0	0	0	0	0	0	0	0	1	0	0	0	0	2
ENSMUSG00000006313	Upk1a	1421	1	0	7	0	1	1	4	3	3	2	1	0	4	3	1	3	2	4
ENSMUSG00000006315	Tmem147	945	569	631	523	692	620	431	522	534	544	612	553	312	521	708	317	739	771	278
ENSMUSG00000006333	Rps9	1744	11077	10538	11125	10874	6860	6002	13250	13793	11852	12131	9366	6109	10483	12926	5196	10378	11469	6051
ENSMUSG00000006335	Tfpt	1166	323	278	250	290	183	145	338	325	283	290	213	169	271	400	140	295	270	104
ENSMUSG00000006342	Susd2	3151	15	64	42	0	1	0	28	34	26	1	0	0	57	41	34	0	0	0
ENSMUSG00000006344	Ggt5	4471	9	5	10	8	8	4	12	9	3	13	16	5	7	14	0	10	10	4
ENSMUSG00000006345	Ggt1	3257	0	0	0	1	0	1	0	1	1	0	0	0	1	0	0	1	0	2
ENSMUSG00000006356	Crip2	1691	5	6	2	6	8	6	2	3	2	10	2	18	4	3	1	12	4	0
ENSMUSG00000006360	Crip1	722	4481	4704	4350	6889	4647	3681	4282	4492	4110	5843	5329	5753	4663	3464	2236	6808	4556	2355
ENSMUSG00000006362	Cbfa2t3	8016	0	0	1	1	2	2	0	0	0	1	2	0	0	0	0	2	2	1
ENSMUSG00000006369	Fbln1	4100	0	0	0	0	0	0	0	0	0	0	1	0	1	0	0	0	0	6
ENSMUSG00000006373	Pgrmc1	1857	1203	1225	1185	1420	1058	833	1179	1284	1137	1203	1067	611	1089	1593	605	1401	1454	408
ENSMUSG00000006378	Gcat	2365	54	100	54	98	94	62	54	40	40	59	39	60	49	65	56	96	68	50
ENSMUSG00000006386	Tek	4702	0	0	0	2	0	0	0	0	0	1	1	1	0	0	1	0	0	6
ENSMUSG00000006389	Mpl	2958	0	0	0	0	0	0	0	0	1	0	1	0	0	0	0	1	0	1
ENSMUSG00000006390	Elovl1	1941	1684	1681	1457	1295	1311	825	1701	1762	1470	1610	1378	802	1526	2160	1045	1641	1797	308
ENSMUSG00000006392	Med8	2042	952	950	916	910	637	503	1088	1120	945	810	594	537	947	1214	516	944	925	284
ENSMUSG00000006395	Hyi	910	226	250	215	345	216	147	219	472	407	320	371	145	235	317	92	285	288	157
ENSMUSG00000006398	Cdc20	1793	132	322	182	353	429	283	88	67	121	104	93	64	218	142	171	272	226	97
ENSMUSG00000006403	Adamts4	4810	3	3	2	1	3	1	6	3	0	1	0	0	1	1	1	1	0	1
ENSMUSG00000006411	Nectin4	3746	357	174	441	171	103	80	526	596	435	194	153	309	317	385	134	188	126	21
ENSMUSG00000006412	Pfdn2	1797	176	225	197	192	131	132	232	205	185	148	153	116	170	246	114	233	222	90
ENSMUSG00000006418	Rnf114	3356	2709	1908	3094	957	824	640	3320	3675	3053	1361	1064	1849	2671	3780	1345	1242	1017	271
ENSMUSG00000006423	C330007P06Rik	3907	782	753	800	1101	741	603	782	771	794	803	686	433	770	969	430	1074	1114	291
ENSMUSG00000006435	Neurl1a	4411	13	7	7	18	19	16	18	34	21	119	96	13	9	12	14	18	17	7
ENSMUSG00000006442	Srm	1338	107	173	97	105	143	97	86	109	98	122	121	57	102	147	80	203	155	24
ENSMUSG00000006445	Epha2	3913	2	0	0	1	0	0	0	0	0	5	0	6	0	0	0	3	0	2
ENSMUSG00000006456	Rbm14	3447	248	336	209	200	281	176	243	257	188	269	246	127	258	403	173	313	296	44
ENSMUSG00000006457	Actn3	2880	1	1	0	0	1	0	2	0	2	2	1	0	1	0	0	0	3	16
ENSMUSG00000006463	Zdhhc24	2558	201	190	196	184	145	107	201	251	221	222	205	173	165	268	68	204	228	32
ENSMUSG00000006464	Bbs1	5581	23	12	13	23	23	21	18	14	12	21	15	24	18	26	12	32	39	9
ENSMUSG00000006469	Slc34a3	2183	1	0	2	0	1	0	0	0	0	0	0	0	0	0	0	0	0	0
ENSMUSG00000006471	Ndor1	4904	256	224	201	247	219	206	278	289	258	348	304	162	226	343	130	332	381	74
ENSMUSG00000006476	Nsmf	2987	133	151	116	139	139	111	160	150	111	207	169	60	142	165	58	189	164	43
ENSMUSG00000006488	Prl7a1	1621	0	0	0	0	1	0	0	0	0	0	0	0	0	0	0	0	2	0
ENSMUSG00000006490	Prl8a9	942	0	0	0	0	0	0	0	0	0	0	0	0	0	0	0	0	0	0
ENSMUSG00000006494	Pdk1	5185	4270	4114	4078	2637	1967	1767	3326	3599	3769	2136	1836	1483	4002	6406	2466	3390	3137	884
ENSMUSG00000006498	Ptbp1	3523	1744	1725	1411	1225	1662	1185	1564	1443	1437	1687	1403	1231	1755	2167	1035	1809	1708	300
ENSMUSG00000006517	Mvd	1756	764	1020	673	725	624	368	636	485	610	594	432	189	703	824	428	529	666	221
ENSMUSG00000006519	Cyba	744	10876	10979	11235	9569	5867	5079	10504	12657	11512	8618	7159	5864	10293	14456	5674	9185	10103	4938
ENSMUSG00000006522	Itih3	2815	0	0	0	0	0	0	1	0	0	0	1	0	1	0	0	0	0	3
ENSMUSG00000006526	Tmem110	3737	248	279	265	154	157	97	353	398	337	202	175	138	307	393	177	176	156	48
ENSMUSG00000006527	Sfmbt1	7955	597	605	608	787	744	756	606	542	610	860	808	352	620	871	304	1188	1066	360
ENSMUSG00000006529	Itih1	3089	0	0	0	0	0	0	0	0	0	0	0	0	0	0	0	0	0	6
ENSMUSG00000006538	Ihh	2468	0	0	0	0	0	2	1	2	0	4	1	0	1	1	1	2	1	0
ENSMUSG00000006542	Prkag3	3546	0	1	0	0	0	0	0	1	0	2	0	0	0	0	2	1	0	1
ENSMUSG00000006546	Cryba2	720	0	0	0	0	0	0	0	0	0	0	0	0	0	0	0	0	1	0
ENSMUSG00000006567	Atp7b	6505	0	0	1	0	0	1	0	1	1	1	0	2	3	0	0	1	1	6
ENSMUSG00000006570	Defb2	305	0	0	0	0	0	0	0	0	0	0	0	0	0	0	0	0	0	0
ENSMUSG00000006574	Slc4a1	4545	0	3	0	0	0	1	0	0	0	2	0	0	1	0	0	0	1	0
ENSMUSG00000006575	Rundc3a	2436	0	2	2	0	1	0	0	0	1	0	0	1	0	0	2	1	0	0
ENSMUSG00000006576	Slc4a3	7789	13	9	6	14	17	6	4	6	7	17	10	3	5	11	3	17	15	5
ENSMUSG00000006585	Cdt1	2189	267	275	221	295	391	332	144	133	147	383	318	253	207	307	138	446	453	55
ENSMUSG00000006586	Runx1t1	6765	0	1	0	0	1	0	0	0	1	0	0	0	0	0	2	0	1	3
ENSMUSG00000006587	Snai3	1628	0	1	0	0	0	0	0	0	0	0	0	0	0	0	0	0	1	1
ENSMUSG00000006589	Aprt	1096	1746	1884	1635	2346	1684	1370	1471	1502	1387	1718	1621	995	1629	2148	995	2462	2557	930
ENSMUSG00000006599	Gtf2h1	2898	1001	1108	1035	1375	1077	786	1173	1016	1041	1220	1004	591	980	1344	548	1338	1401	375
ENSMUSG00000006611	Hfe	3572	722	512	549	949	659	501	655	681	658	1160	785	429	509	825	279	829	1024	306
ENSMUSG00000006641	Slc5a6	3889	72	88	78	83	82	55	84	81	75	77	62	49	65	93	50	75	88	18
ENSMUSG00000006642	Tcf23	4116	0	0	0	0	0	0	3	0	0	0	0	0	0	1	0	0	0	1
ENSMUSG00000006649	Nphs1	4814	1	0	0	0	0	0	0	0	1	4	0	0	0	0	0	0	0	2
ENSMUSG00000006651	Aplp1	2343	46	33	41	36	29	32	33	40	33	24	30	35	31	50	22	42	38	1
ENSMUSG00000006673	Qrich1	4525	1550	1597	1465	1338	1523	1109	1681	1702	1477	1809	1403	1076	1496	1997	887	1753	1721	282
ENSMUSG00000006675	P4htm	2492	1	0	1	6	0	0	0	1	1	3	0	2	1	2	0	1	1	0
ENSMUSG00000006676	Usp19	5292	1397	1429	1325	1483	1419	1067	1553	1448	1403	1814	1427	977	1402	1833	760	1710	1669	367
ENSMUSG00000006678	Pola1	5346	226	257	244	711	528	470	151	138	195	401	379	235	221	249	151	712	763	301
ENSMUSG00000006699	Cdc42	2966	17436	16964	17645	14196	13018	9631	18542	17363	17853	14716	12296	10261	17067	23600	10051	17697	16832	3619
ENSMUSG00000006705	Pknox1	4619	364	292	266	244	292	177	356	313	354	361	303	220	302	490	193	346	325	65
ENSMUSG00000006711	D130043K22Rik	4973	0	1	3	0	0	0	0	0	1	0	0	0	1	1	1	1	1	2
ENSMUSG00000006715	Gmnn	1465	361	503	469	874	572	492	273	222	259	571	491	433	347	400	219	741	768	426
ENSMUSG00000006717	Acot13	721	222	290	205	518	400	280	179	159	191	395	283	158	202	223	122	397	383	186
ENSMUSG00000006720	Zfp184	3216	1	0	2	1	1	3	0	1	1	1	0	0	0	1	0	0	0	2
ENSMUSG00000006724	Cyp27b1	2380	0	0	0	0	1	0	1	0	0	0	1	0	0	4	0	0	2	1
ENSMUSG00000006728	Cdk4	2405	936	1075	854	1303	1184	857	807	781	747	1142	893	538	887	1091	603	1549	1504	440
ENSMUSG00000006731	B4galnt1	2395	327	353	272	365	556	345	258	319	260	507	427	285	337	501	215	614	515	114
ENSMUSG00000006732	Mettl1	2128	85	151	94	82	89	67	71	61	91	79	77	47	102	104	55	134	94	22
ENSMUSG00000006736	Tspan31	1556	1178	1114	1189	810	947	661	1193	1069	1182	1128	850	939	1133	1440	660	1099	1046	268
ENSMUSG00000006740	Kif5b	6032	6568	6092	6588	5816	4791	4189	7384	5832	7399	6588	5669	3889	6211	8825	3325	7717	7706	1677
ENSMUSG00000006763	Saal1	4728	154	185	157	206	151	119	122	147	98	185	133	102	160	181	84	199	187	93
ENSMUSG00000006764	Tph2	2626	0	1	0	1	2	0	0	0	0	0	0	0	0	2	0	1	0	3
ENSMUSG00000006777	Krt23	1565	0	0	1	0	0	0	0	0	0	0	0	1	0	0	0	1	2	0
ENSMUSG00000006782	Cnp	2357	945	702	1403	457	373	294	1503	1536	1313	537	354	914	800	1205	489	484	393	101
ENSMUSG00000006784	Ttc25	2845	3	4	1	5	6	2	2	2	0	4	4	0	1	1	1	4	4	4
ENSMUSG00000006800	Sulf2	4919	296	330	253	722	890	623	285	314	188	1447	1451	456	285	336	164	1139	1104	138
ENSMUSG00000006818	Sod2	3824	31790	29164	30724	2885	1737	1948	40480	43229	37569	5413	4153	5092	32233	43341	17402	3536	3055	849
ENSMUSG00000006850	Tmco6	1817	154	174	189	136	113	99	158	133	199	133	92	90	134	176	85	158	160	65
ENSMUSG00000006906	Stambp	3009	154	140	125	93	123	96	167	123	137	135	88	87	113	167	61	142	125	26
ENSMUSG00000006920	Ezh1	6081	787	779	709	964	937	649	810	752	742	1090	831	601	766	1012	405	1110	1024	171
ENSMUSG00000006930	Hap1	3766	16	6	24	1	5	4	42	21	27	3	2	54	14	14	1	5	1	0
ENSMUSG00000006931	P3h4	2178	0	2	1	0	1	0	0	0	2	0	1	2	1	0	0	1	0	0
ENSMUSG00000006932	Ctnnb1	4225	9883	10096	9385	15022	9829	7822	8625	9715	8453	12307	11442	6199	9365	12319	4741	15632	15249	3211
ENSMUSG00000006941	Eif1b	1125	499	444	386	681	445	363	520	564	463	595	512	282	485	694	256	674	728	259
ENSMUSG00000006948	Klk4	1249	0	1	0	0	0	0	0	0	0	1	0	0	0	0	0	0	0	0
ENSMUSG00000006958	Chrd	3865	0	0	1	0	1	1	0	0	2	1	0	0	0	0	0	0	0	7
ENSMUSG00000006998	Psmd2	2961	6237	7020	6496	6513	4936	3667	6526	6763	6360	5402	4403	4008	6119	7857	3366	6590	6616	1621
ENSMUSG00000007021	Syngr3	1965	1	2	3	8	0	2	0	1	1	1	1	0	2	0	0	2	2	1
ENSMUSG00000007029	Vars	4412	531	638	488	599	590	493	480	541	515	563	414	300	561	578	283	691	558	141
ENSMUSG00000007030	Vwa7	4313	13	20	8	17	14	11	10	10	16	27	15	10	15	20	10	25	20	14
ENSMUSG00000007033	Hspa1l	2472	15	15	23	14	8	8	8	29	9	1	5	14	23	20	11	14	8	10
ENSMUSG00000007034	Slc44a4	2499	0	3	0	0	0	0	3	3	2	1	0	0	1	0	1	0	0	1
ENSMUSG00000007035	Msh5	2913	17	21	12	22	24	14	13	14	6	25	19	23	19	11	9	29	34	12
ENSMUSG00000007036	Abhd16a	1945	781	668	829	818	508	428	741	992	774	751	623	613	794	979	409	765	874	186
ENSMUSG00000007038	Neu1	2474	2264	2135	2132	1756	1417	1146	2448	2432	2463	1836	1373	1320	2145	2869	1182	1813	1838	406
ENSMUSG00000007039	Ddah2	1495	93	63	79	163	115	107	89	87	90	193	179	47	91	95	36	207	158	61
ENSMUSG00000007041	Clic1	1466	7640	7470	7786	9257	6291	5405	7746	8049	7334	7214	5957	6157	7667	9889	4331	9827	9326	4282
ENSMUSG00000007050	Lsm2	1108	96	102	81	92	154	98	84	67	80	112	97	58	96	94	49	144	141	36
ENSMUSG00000007080	Pole	7423	95	164	126	234	317	249	55	28	68	211	157	97	117	114	88	325	282	57
ENSMUSG00000007097	Atp1a2	6401	0	0	0	0	0	0	0	1	0	0	0	0	1	0	0	0	0	2
ENSMUSG00000007107	Atp1a4	3470	1	0	0	1	1	0	0	0	0	2	1	0	1	0	2	1	1	3
ENSMUSG00000007122	Casq1	1847	0	0	0	0	0	0	0	0	0	0	0	0	0	0	1	0	0	2
ENSMUSG00000007207	Stx1a	2162	3	5	2	2	3	1	6	6	7	8	5	2	4	11	1	5	3	2
ENSMUSG00000007209	Ceacam9	1411	0	0	0	0	0	0	0	0	0	0	0	0	0	0	0	0	1	2
ENSMUSG00000007216	Zfp775	4162	81	107	82	105	67	63	73	86	62	77	61	59	89	105	38	89	97	31
ENSMUSG00000007279	Scube2	3748	0	2	0	0	0	0	0	0	1	0	0	0	0	0	0	0	0	1
ENSMUSG00000007338	Mrpl49	1722	328	350	303	376	275	222	311	293	302	341	299	194	270	354	167	335	355	119
ENSMUSG00000007379	Dennd2c	5145	78	83	60	208	222	142	42	27	61	183	131	60	57	90	64	296	275	57
ENSMUSG00000007411	Mark3	3555	846	787	823	755	635	530	891	885	886	1013	703	585	778	1023	423	889	878	364
ENSMUSG00000007415	Gatad1	4168	897	928	885	950	858	637	922	771	818	976	736	429	882	1157	465	1137	1132	225
ENSMUSG00000007440	Pcdha11	2499	0	0	1	0	0	0	0	0	0	0	0	0	0	1	0	0	1	0
ENSMUSG00000007457	2310003L06Rik	1431	0	0	0	0	0	0	1	0	0	0	0	0	0	0	0	0	1	2
ENSMUSG00000007458	M6pr	2539	13370	13366	13548	8096	6231	5267	14507	14758	14058	7704	6630	5236	12789	17204	7730	9239	9019	2509
ENSMUSG00000007476	Lrrc8a	4308	482	457	449	406	512	374	508	489	471	675	498	296	475	648	313	598	568	57
ENSMUSG00000007480	Mc5r	1162	0	1	0	0	0	0	0	0	0	0	0	0	2	0	0	0	0	2
ENSMUSG00000007564	Ppp2r1a	2410	3066	3098	2790	2496	2795	1957	2783	2819	2589	2683	2246	1971	2964	3999	1754	3497	3260	481
ENSMUSG00000007570	Fance	2163	232	247	200	447	299	267	202	229	223	414	359	179	201	336	113	496	542	106
ENSMUSG00000007589	Tinf2	1736	154	186	175	180	153	117	147	131	155	158	136	175	136	172	96	197	187	57
ENSMUSG00000007591	Tssk4	1688	8	3	4	7	5	5	4	4	2	6	12	8	2	7	6	7	6	3
ENSMUSG00000007594	Hapln4	3648	2	1	0	2	2	0	2	1	0	4	0	0	2	5	1	0	2	0
ENSMUSG00000007603	Dus3l	2303	228	244	201	296	221	184	289	306	272	376	242	165	195	357	137	366	298	79
ENSMUSG00000007610	Gtpbp3	2803	285	287	308	328	219	153	330	318	331	325	275	244	301	387	143	313	327	107
ENSMUSG00000007613	Tgfbr1	6414	2496	2350	2086	4412	3551	2925	1847	1826	1990	5351	4774	1515	2266	3358	1219	5484	5767	1026
ENSMUSG00000007617	Homer1	11508	389	403	436	392	323	275	372	388	403	434	350	286	369	514	194	483	458	136
ENSMUSG00000007646	Rad51c	4304	18	32	20	53	36	33	18	7	18	25	33	19	18	15	19	66	43	29
ENSMUSG00000007653	Gabrb2	4103	0	0	0	0	0	0	0	0	1	0	0	0	1	0	1	0	0	2
ENSMUSG00000007655	Cav1	3207	1201	1201	1127	418	368	552	1889	1457	1317	2129	1608	680	1122	1466	616	783	625	115
ENSMUSG00000007656	Arpp19	4449	783	871	859	971	818	620	912	909	854	925	801	583	776	1102	433	1073	1119	359
ENSMUSG00000007659	Bcl2l1	4586	993	875	966	1650	1476	1069	714	670	726	1457	1357	899	964	1208	534	2305	2301	382
ENSMUSG00000007670	Khsrp	3990	1098	1062	931	991	1259	771	1077	1068	1012	1292	1050	669	1122	1275	550	1372	1249	218
ENSMUSG00000007682	Dio2	5815	193	187	218	333	399	243	56	58	64	131	118	89	185	318	72	448	538	69
ENSMUSG00000007721	Ccdc124	1696	531	524	517	617	443	353	549	574	479	618	526	406	529	764	308	654	671	169
ENSMUSG00000007739	Cct4	2484	2500	2981	2571	3278	2504	2101	2603	2387	2657	2929	2333	1354	2524	3085	1376	3474	3433	966
ENSMUSG00000007777	0610009B22Rik	998	195	192	185	325	225	181	173	138	174	227	179	135	208	259	115	260	334	70
ENSMUSG00000007783	Cpt1c	2797	4	4	2	8	12	2	6	4	4	3	0	4	3	1	0	6	3	1
ENSMUSG00000007805	Twist2	3174	0	0	0	0	0	1	0	1	0	2	0	0	1	0	0	1	0	2
ENSMUSG00000007812	Zfp655	5598	729	745	655	1032	722	663	738	613	718	990	775	342	765	939	427	1040	1103	235
ENSMUSG00000007815	Rhoa	2477	5906	6112	6079	5470	4749	3383	6090	5993	6088	5070	4447	3866	5778	7927	3367	6314	5877	1427
ENSMUSG00000007817	Zmiz1	7482	533	568	367	594	822	834	485	372	539	869	788	427	589	686	291	945	755	172
ENSMUSG00000007827	Ankrd26	6930	200	205	180	267	235	208	192	169	211	271	195	112	191	280	126	355	343	103
ENSMUSG00000007833	Aldh16a1	3883	791	861	755	1202	868	698	850	899	878	1194	889	651	744	1106	485	1136	1154	340
ENSMUSG00000007836	Hnrnpa0	2678	1305	1305	1167	1385	1194	891	1481	1338	1344	1669	1315	836	1075	1515	564	1518	1474	365
ENSMUSG00000007837	Prrg2	2348	190	175	175	178	131	94	207	223	196	176	180	150	171	263	107	173	176	71
ENSMUSG00000007850	Hnrnph1	2511	2194	2722	2001	2596	2334	1616	2253	1974	2142	2688	2216	1105	2327	2864	1245	2947	2636	750
ENSMUSG00000007867	Ift43	855	75	83	74	88	64	60	68	69	59	73	69	57	82	81	42	119	76	28
ENSMUSG00000007872	Id3	1278	514	449	351	724	537	643	345	290	287	1530	1104	701	411	269	162	537	645	359
ENSMUSG00000007877	Tcap	948	2	0	1	0	1	0	2	4	5	5	2	2	0	1	0	0	0	1
ENSMUSG00000007880	Arid1a	9393	600	538	527	396	554	520	701	693	640	760	603	459	580	823	308	617	528	71
ENSMUSG00000007888	Crlf1	1644	0	0	0	1	0	2	0	0	0	0	0	0	0	0	0	0	0	0
ENSMUSG00000007891	Ctsd	586	15221	14660	15124	23494	18271	13563	12442	13803	11789	21113	18518	8713	13077	21019	9211	24255	30411	5863
ENSMUSG00000007892	Rplp1	499	8585	9337	9002	11830	8187	7216	9558	9687	8493	10692	8893	5430	8652	10809	4684	11389	13020	6522
ENSMUSG00000007907	Cabs1	1505	0	0	0	0	0	0	0	0	0	1	0	0	1	0	1	0	0	8
ENSMUSG00000007908	Hmgcll1	3737	0	0	0	0	2	0	0	0	0	0	0	0	0	0	1	0	0	4
ENSMUSG00000007944	Ttc9b	2052	1	0	0	0	0	0	0	0	0	0	0	0	0	0	0	0	0	0
ENSMUSG00000007946	Phox2a	1609	0	0	0	0	0	0	0	0	0	0	0	0	0	0	0	0	0	0
ENSMUSG00000007950	Abhd8	1978	154	204	161	224	221	163	135	147	176	183	148	97	169	214	109	243	248	102
ENSMUSG00000007987	Ift22	3302	482	424	505	338	309	231	519	462	402	297	245	304	406	479	252	382	369	126
ENSMUSG00000007989	Fzd3	12734	1	0	0	0	5	0	1	1	0	0	2	0	0	0	0	1	4	13
ENSMUSG00000008028	1700008O03Rik	1260	4	1	1	2	3	2	2	0	0	4	0	2	0	0	0	2	2	1
ENSMUSG00000008035	Mid1ip1	2071	1236	1378	1256	2259	1949	1333	1019	904	929	1574	1475	919	1313	1467	642	2690	2739	742
ENSMUSG00000008036	Ap2s1	836	2690	2576	2699	2847	1870	1396	3002	3037	2739	2379	1964	1451	2422	3633	1519	2724	2810	1087
ENSMUSG00000008090	Fgfrl1	2703	19	10	22	24	30	12	5	15	11	18	16	5	16	15	10	25	37	1
ENSMUSG00000008129	4930432K21Rik	2406	2	7	6	10	9	9	4	5	9	19	12	7	5	10	4	18	7	2
ENSMUSG00000008136	Fhl2	1897	0	0	1	0	0	1	0	0	0	0	0	1	0	0	0	0	0	0
ENSMUSG00000008140	Emc10	1971	722	707	580	661	674	403	409	388	352	460	394	250	641	902	345	812	784	154
ENSMUSG00000008153	Clstn3	4202	1	0	2	1	0	1	1	0	2	0	1	1	0	2	1	2	2	2
ENSMUSG00000008167	Fbxw9	1638	157	168	150	227	175	109	146	173	140	188	136	121	170	206	92	253	199	37
ENSMUSG00000008193	Spib	2868	2	1	1	0	0	0	0	1	2	2	2	3	0	1	0	0	1	0
ENSMUSG00000008200	Fnbp4	4691	869	692	864	552	574	496	1085	1074	996	1012	755	596	761	1325	406	819	759	127
ENSMUSG00000008206	Cers4	9505	62	53	50	68	74	43	89	31	69	92	64	36	51	112	24	100	117	30
ENSMUSG00000008226	Scrn3	4606	176	164	147	323	288	158	170	131	138	237	206	163	150	228	104	307	319	87
ENSMUSG00000008301	Phax	2223	606	669	616	862	573	464	727	747	625	806	595	419	600	798	363	802	846	295
ENSMUSG00000008305	Tle1	5246	66	124	67	192	178	133	48	45	32	217	144	80	63	105	53	219	221	96
ENSMUSG00000008307	1700109H08Rik	773	16	17	13	13	15	12	18	12	15	10	19	5	12	13	3	27	25	6
ENSMUSG00000008318	Relt	3280	163	182	132	46	49	42	237	247	219	71	51	30	125	234	100	58	56	10
ENSMUSG00000008333	Snrpb2	2243	830	840	712	810	786	586	885	814	814	1097	853	597	771	943	395	1011	1035	289
ENSMUSG00000008348	Ubc	2893	4228	3014	3761	3699	2871	2255	3617	4536	3562	4039	3028	2876	3269	4193	1408	3962	3541	828
ENSMUSG00000008373	Prpf31	3145	1515	1588	1529	1432	979	774	1514	1605	1307	1193	998	687	1444	1832	851	1443	1452	524
ENSMUSG00000008384	Sertad1	1344	516	411	578	411	320	267	557	670	497	493	457	351	543	612	243	502	422	139
ENSMUSG00000008393	Carhsp1	2849	652	589	913	437	510	348	798	733	713	455	369	517	711	898	346	517	530	107
ENSMUSG00000008398	Elk3	4212	1171	1010	910	644	899	645	1234	1302	1255	1151	908	719	1049	1552	573	1109	918	180
ENSMUSG00000008429	Herpud2	2781	297	318	245	328	393	310	290	269	261	409	351	223	318	366	155	415	421	75
ENSMUSG00000008435	Rdh13	3238	430	526	403	593	313	292	454	428	396	437	382	183	454	659	277	573	594	176
ENSMUSG00000008438	Adam21	2911	2	2	3	6	0	0	4	5	1	2	0	3	3	6	2	2	3	2
ENSMUSG00000008450	Nutf2	1769	117	176	99	111	141	105	142	144	145	150	120	73	123	169	87	200	164	31
ENSMUSG00000008461	Fut1	2786	0	0	3	0	0	0	0	0	0	0	0	0	0	0	0	0	0	0
ENSMUSG00000008475	Arpc5	1914	10289	10032	10686	7017	6858	5033	10545	10478	9859	7464	6390	4501	9791	13226	5193	9486	9094	1690
ENSMUSG00000008482	Rnf151	1189	0	0	0	2	1	0	1	0	1	3	0	0	2	1	0	1	4	5
ENSMUSG00000008489	Elavl2	5300	0	0	0	0	0	0	0	0	0	0	0	0	1	0	0	0	1	0
ENSMUSG00000008496	Pou2f2	7620	610	492	464	91	123	81	794	658	645	183	150	87	543	730	301	132	113	26
ENSMUSG00000008540	Mgst1	2013	2412	2000	2119	2620	1580	1308	2202	2841	2623	2591	2412	1405	1784	2876	1012	2244	2828	894
ENSMUSG00000008575	Nfib	9468	0	1	0	0	1	1	0	1	0	0	0	0	1	1	2	0	2	0
ENSMUSG00000008590	Htr3b	2411	1	0	0	0	0	1	0	0	0	0	1	0	1	0	0	1	0	1
ENSMUSG00000008601	Rab25	1228	0	1	1	2	2	0	4	1	1	1	0	0	1	1	3	1	2	2
ENSMUSG00000008604	Ubqln4	3330	292	354	307	313	399	291	332	313	293	517	368	202	296	415	203	469	452	66
ENSMUSG00000008658	Rbfox1	4151	0	1	2	0	0	1	0	1	1	0	1	0	2	3	5	2	0	1
ENSMUSG00000008668	Rps18	600	4414	4747	4429	6368	4125	3656	4335	5062	4255	5931	4640	2643	4570	5197	2175	6160	6672	2916
ENSMUSG00000008682	Rpl10	903	3692	3885	3229	3415	4295	3126	3711	3678	3269	5479	4208	2017	3322	4560	1969	4765	5026	948
ENSMUSG00000008683	Rps15a	6000	4945	5200	4905	6511	3936	3724	3783	3832	3582	4196	3365	1737	4624	5489	2320	6104	6594	6096
ENSMUSG00000008690	Ncaph2	3319	1407	1584	1415	1987	1489	1186	1223	1478	1370	1512	1230	836	1476	1770	836	2006	1843	638
ENSMUSG00000008730	Hipk1	8201	2921	2730	2233	2829	3192	2726	2374	2062	2647	4062	3547	2121	3009	3638	1433	4049	3769	708
ENSMUSG00000008734	Gprc5b	4518	73	80	60	177	182	120	420	644	441	291	246	868	70	75	28	159	194	84
ENSMUSG00000008763	Man1a2	7969	1640	1682	1693	1644	1600	1257	1594	1723	1761	1985	1757	998	1470	2198	872	2077	2144	348
ENSMUSG00000008789	Ceacam5	3273	0	1	0	0	0	0	0	1	0	0	0	0	0	0	0	0	0	0
ENSMUSG00000008813	Tppp2	741	1	0	0	0	0	0	0	0	1	0	0	0	0	0	0	0	1	3
ENSMUSG00000008822	Acyp1	1380	92	86	55	177	100	63	78	41	85	108	62	94	72	87	26	144	115	95
ENSMUSG00000008843	Cldn13	1067	0	0	0	0	0	0	0	0	0	0	0	0	0	0	0	0	0	3
ENSMUSG00000008845	Cd163	4487	129	100	72	81	40	20	195	209	182	85	62	44	93	114	42	61	49	16
ENSMUSG00000008855	Hdac5	5636	987	825	843	1117	1146	879	812	732	763	1303	1075	745	873	1195	494	1433	1410	246
ENSMUSG00000008859	Rala	2899	1554	1684	1440	1065	1253	912	1268	1163	1201	1290	1110	616	1372	1904	941	1707	1500	365
ENSMUSG00000008874	Clec3a	591	0	1	0	0	0	0	0	0	0	0	0	0	0	0	0	0	0	0
ENSMUSG00000008892	Vdac3	1423	1437	1550	1506	1333	762	637	1595	1680	1529	951	831	683	1422	1760	746	1144	1198	433
ENSMUSG00000008932	Slc1a7	3007	1	0	0	0	0	0	0	0	0	0	0	0	0	0	0	0	1	0
ENSMUSG00000008958	Vps72	1456	370	412	296	373	368	247	347	403	321	415	298	265	304	474	200	429	447	69
ENSMUSG00000008976	Gabpa	5086	1201	998	1124	1436	1152	869	1269	1230	1238	1515	1199	825	1032	1503	590	1532	1474	297
ENSMUSG00000008999	Bmp7	3670	0	0	0	0	0	0	0	0	0	1	0	0	0	0	0	0	0	2
ENSMUSG00000009013	Dynll1	2211	856	917	861	578	640	470	977	848	953	675	649	580	737	1080	525	805	818	128
ENSMUSG00000009030	Pdcl	3649	1201	1335	1248	1526	1182	871	1165	1139	1147	1307	1088	700	1067	1522	621	1558	1693	473
ENSMUSG00000009035	Tmem184b	3434	946	560	918	377	531	412	843	1048	944	538	410	922	946	1187	475	603	512	78
ENSMUSG00000009047	Gm5965	588	0	0	0	0	0	0	0	0	0	0	0	0	0	0	0	0	0	2
ENSMUSG00000009070	Rsph14	2479	0	0	0	0	0	0	0	0	0	2	0	0	1	0	0	0	1	3
ENSMUSG00000009073	Nf2	5570	1251	1364	1040	2134	1890	1257	1068	1045	926	1780	1345	861	1275	1614	688	2460	2184	731
ENSMUSG00000009075	Cabp7	2628	0	0	0	0	0	0	0	0	0	0	0	0	1	0	0	0	0	0
ENSMUSG00000009076	Zmat5	792	159	142	97	88	136	94	129	116	151	122	120	104	117	153	77	148	132	24
ENSMUSG00000009079	Ewsr1	3878	3770	3513	3459	3194	2573	1964	4341	4507	4022	3660	2916	2076	3704	5189	1999	3682	3675	728
ENSMUSG00000009090	Ap1b1	4106	2521	1961	2704	2649	2271	1985	2823	2383	2220	3296	2674	1477	1996	3298	1232	3220	3178	535
ENSMUSG00000009092	Derl3	1321	0	0	0	3	2	1	0	1	1	1	1	1	0	2	0	1	2	3
ENSMUSG00000009093	Gstt4	964	0	0	0	0	0	0	0	1	0	0	0	0	1	0	0	0	0	3
ENSMUSG00000009097	Tbx1	1777	0	0	0	0	0	1	0	0	0	0	0	2	0	0	0	0	0	0
ENSMUSG00000009108	Gnat2	2358	0	0	0	0	0	2	0	0	1	0	0	0	0	0	2	0	0	0
ENSMUSG00000009112	Bcl2l13	6951	505	547	491	500	485	380	611	661	578	617	498	375	546	669	306	647	609	164
ENSMUSG00000009114	2610028H24Rik	1705	0	0	0	0	0	0	0	0	0	0	1	0	0	0	0	0	0	0
ENSMUSG00000009115	Spatc1l	1332	1	2	0	0	0	0	0	0	0	0	1	0	0	1	1	0	0	0
ENSMUSG00000009145	Dqx1	3257	4	7	12	4	5	10	12	12	15	13	9	3	10	19	2	9	10	2
ENSMUSG00000009185	Ccl8	511	92	35	243	3	1	3	268	182	148	12	2	32	74	54	33	5	3	0
ENSMUSG00000009207	Lnpk	3811	438	482	494	595	518	438	407	416	398	473	391	230	410	596	246	679	670	276
ENSMUSG00000009210	Prr29	1724	0	0	0	0	0	0	0	0	0	0	0	0	0	0	0	0	0	0
ENSMUSG00000009214	Mymk	1511	0	1	0	1	0	0	0	0	0	1	0	0	0	0	0	0	0	3
ENSMUSG00000009216	Fam163b	2959	0	0	0	0	0	0	0	1	0	0	0	0	0	0	0	0	0	0
ENSMUSG00000009246	Trpm5	4849	0	1	0	0	0	0	0	0	1	0	0	0	1	2	1	0	0	1
ENSMUSG00000009248	Ascl2	1623	0	2	0	0	0	1	0	0	2	0	0	0	0	2	2	0	0	0
ENSMUSG00000009281	Rarres2	832	0	0	0	0	0	0	0	0	0	0	0	0	0	1	0	1	0	0
ENSMUSG00000009291	Pttg1ip	2471	2535	2438	2354	2580	2105	1605	2283	2676	2596	2666	2334	1368	2398	3542	1415	2893	3031	593
ENSMUSG00000009292	Trpm2	7297	102	102	72	112	76	39	92	140	107	139	98	103	77	113	59	112	89	30
ENSMUSG00000009293	Ube2g2	2157	1186	1111	1082	1121	779	669	1126	1110	1017	1119	966	456	1022	1387	588	1273	1374	437
ENSMUSG00000009350	Mpo	3143	0	6	16	2	16	7	1	3	4	3	1	0	2	8	5	4	8	3
ENSMUSG00000009356	Lpo	3057	0	0	0	0	0	0	1	0	0	0	0	0	0	3	0	0	0	2
ENSMUSG00000009376	Met	6923	432	431	747	27	36	27	523	1006	534	28	34	29	632	1182	402	45	79	22
ENSMUSG00000009378	Slc16a12	4051	1	0	0	0	1	1	0	0	0	6	3	0	0	0	0	4	3	2
ENSMUSG00000009394	Syn2	5026	0	0	0	0	0	1	0	0	0	0	1	0	2	0	0	0	0	11
ENSMUSG00000009406	Elk1	3548	257	278	284	162	249	128	314	295	302	281	208	133	296	391	160	275	219	57
ENSMUSG00000009418	Nav1	13061	847	723	571	785	1079	959	651	464	707	1269	1099	613	752	941	376	1420	1181	196
ENSMUSG00000009470	Tnpo1	8579	3567	3945	3435	4052	3433	2742	3151	3130	3388	4052	3817	1896	3430	4893	1981	4947	5210	812
ENSMUSG00000009471	Myod1	1861	0	0	0	0	0	0	0	0	1	0	0	0	0	0	0	0	0	4
ENSMUSG00000009487	Otog	10123	2	0	0	1	0	0	0	0	3	0	1	0	3	0	1	0	1	5
ENSMUSG00000009535	Rnmt	5392	1163	1086	1057	811	630	527	1471	1329	1370	897	800	471	1116	1451	572	933	966	173
ENSMUSG00000009545	Kcnq1	4093	0	1	0	2	1	3	0	0	1	0	0	2	1	1	1	1	0	3
ENSMUSG00000009549	Srp14	1154	1479	1495	1525	2051	1193	959	1385	1448	1454	1456	1294	957	1437	1743	852	1923	2041	893
ENSMUSG00000009551	6330409D20Rik	1119	0	1	0	0	0	0	0	1	0	0	0	0	0	0	1	1	0	1
ENSMUSG00000009555	Cdk9	1888	928	851	804	1070	828	651	822	871	903	1105	969	673	875	1148	418	1092	1073	331
ENSMUSG00000009563	Tor2a	1625	447	403	453	460	465	297	435	453	429	531	375	269	405	594	253	533	574	164
ENSMUSG00000009566	Fpgs	2400	59	96	49	81	75	56	88	53	61	84	76	44	52	72	46	108	95	24
ENSMUSG00000009569	Mkl2	8990	638	678	481	708	910	662	533	506	532	919	829	419	622	909	298	1110	1041	189
ENSMUSG00000009575	Cbx5	9006	789	1206	835	1514	1442	1121	643	462	651	1066	1019	498	824	941	547	1849	1577	329
ENSMUSG00000009580	Odam	1376	0	0	0	0	0	0	0	0	0	0	0	0	0	0	0	0	0	3
ENSMUSG00000009585	Apobec3	3292	416	638	971	232	292	217	1717	1564	1389	474	343	736	404	1317	213	300	327	58
ENSMUSG00000009588	St6galnac1	2392	0	0	0	0	0	1	0	2	0	2	0	2	1	0	0	0	0	5
ENSMUSG00000009596	Taf7l	2003	0	0	0	0	0	0	3	0	0	0	0	0	0	0	0	0	0	0
ENSMUSG00000009614	Sardh	4684	0	1	0	1	3	4	1	2	0	0	3	0	5	0	1	4	5	2
ENSMUSG00000009621	Vav2	5221	310	250	266	255	239	213	330	317	338	299	258	123	231	386	130	365	342	80
ENSMUSG00000009628	Tex15	9622	4	6	4	12	10	8	1	0	0	5	3	3	3	1	2	11	10	7
ENSMUSG00000009630	Ppp2cb	1469	1088	1139	1107	998	695	573	1188	1296	1081	841	693	402	976	1389	533	1018	995	295
ENSMUSG00000009633	G0s2	871	0	0	1	2	3	0	0	0	0	5	1	0	0	0	0	1	2	0
ENSMUSG00000009640	Dmap1	1566	241	248	233	275	201	128	256	277	197	271	167	184	232	293	140	242	278	103
ENSMUSG00000009646	Pla2g12b	1182	0	0	0	0	0	0	0	0	0	0	0	0	0	0	0	0	3	0
ENSMUSG00000009647	Mcu	3207	225	243	226	274	334	251	196	199	199	363	293	137	204	287	147	438	406	83
ENSMUSG00000009654	Oit3	2717	209	207	146	116	152	128	70	85	101	95	90	116	196	252	122	214	190	21
ENSMUSG00000009670	Tex11	3624	3	1	0	5	0	0	3	8	0	5	11	2	0	2	0	0	4	0
ENSMUSG00000009681	Bcr	7359	30	27	19	30	30	23	23	20	21	26	19	10	30	35	15	41	28	6
ENSMUSG00000009687	Fxyd5	3717	3046	3041	2571	3000	4312	2578	2767	2515	2594	4568	3108	2932	2991	3795	1875	4433	4316	661
ENSMUSG00000009731	Kcnd1	5287	3	1	1	0	0	3	3	0	6	0	2	0	0	0	0	2	1	0
ENSMUSG00000009733	Tfcp2	3250	126	98	117	108	105	70	142	129	120	108	103	67	123	146	71	168	139	32
ENSMUSG00000009734	Pou6f2	6266	2	0	0	0	0	0	0	0	0	1	0	0	0	4	1	0	0	4
ENSMUSG00000009739	Pou6f1	6305	214	184	156	132	142	130	210	166	186	190	118	130	181	313	81	162	147	22
ENSMUSG00000009741	Ubp1	3944	989	848	746	698	608	460	1109	1002	992	1053	875	458	878	1322	445	878	786	164
ENSMUSG00000009772	Nuak2	3131	369	432	441	341	315	238	395	445	394	423	321	272	405	489	242	414	392	88
ENSMUSG00000009828	Ick	8387	44	58	55	63	94	73	72	54	46	127	73	32	40	70	44	102	120	24
ENSMUSG00000009863	Sdhb	1142	2222	2465	2465	2856	1849	1459	2597	2461	2433	2096	1699	1554	2097	2819	1333	2476	2645	1732
ENSMUSG00000009876	Cox4i2	788	1	1	5	1	0	0	2	0	0	1	0	0	0	1	2	2	2	3
ENSMUSG00000009894	Snap47	2651	349	399	334	579	439	320	321	257	324	393	309	293	336	399	223	538	497	162
ENSMUSG00000009900	Wnt3a	2761	0	0	0	0	0	0	0	0	0	0	2	0	0	0	0	1	0	3
ENSMUSG00000009905	Kdsr	5518	152	212	130	376	334	244	140	141	176	327	344	145	147	196	92	412	436	127
ENSMUSG00000009907	Vps4b	7572	3438	3339	3419	3315	2843	2103	3417	3440	3296	3415	2918	1860	3196	4432	1673	4027	4024	931
ENSMUSG00000009927	Rps25	1373	5960	6426	5750	6163	5420	4483	6088	6433	5645	6324	5119	2860	5492	6963	3330	6998	7542	3726
ENSMUSG00000009941	Nxf2	2461	6	4	3	4	4	2	11	5	4	3	0	5	9	4	4	4	5	8
ENSMUSG00000009995	Taz	1890	577	511	495	649	420	355	609	609	594	789	612	340	521	746	253	656	688	212
ENSMUSG00000010021	Kif19a	3598	13	3	3	8	10	6	15	7	8	2	4	30	8	6	2	8	7	11
ENSMUSG00000010025	Aldh3a2	5317	1264	1317	1105	1256	1151	814	1269	1189	1246	1365	1097	793	1242	1813	693	1456	1552	236
ENSMUSG00000010044	Zmynd10	1765	0	1	2	1	1	1	0	0	0	1	0	2	0	3	1	1	1	2
ENSMUSG00000010045	Tmem115	2194	496	468	465	515	486	352	505	482	547	670	500	341	501	630	255	604	635	116
ENSMUSG00000010047	Hyal2	3293	221	254	190	309	276	224	181	186	206	306	290	155	212	334	147	382	464	74
ENSMUSG00000010048	Ifrd2	2056	98	130	80	123	116	78	111	94	82	116	126	54	79	113	72	157	131	30
ENSMUSG00000010051	Hyal1	1076	72	57	49	121	125	72	21	40	25	88	84	32	55	97	43	164	160	23
ENSMUSG00000010054	Tusc2	1665	210	218	186	347	270	194	211	205	180	292	314	182	186	258	125	381	384	127
ENSMUSG00000010057	Nprl2	1441	150	135	139	218	161	129	149	134	164	219	146	111	128	201	95	190	239	52
ENSMUSG00000010064	Slc38a3	4017	1	1	0	0	0	0	0	0	1	2	0	0	0	0	0	1	0	4
ENSMUSG00000010066	Cacna2d2	5831	2	0	0	0	2	0	0	0	1	1	0	0	2	0	1	0	0	3
ENSMUSG00000010067	Rassf1	2142	548	576	558	496	296	263	631	638	568	533	468	335	578	745	282	604	518	131
ENSMUSG00000010080	Epn3	3884	0	0	1	1	0	0	1	0	0	0	0	0	0	0	0	0	0	1
ENSMUSG00000010086	Rnf112	3262	0	0	0	0	0	0	0	0	2	1	0	0	0	0	0	1	0	0
ENSMUSG00000010095	Slc3a2	3343	6095	5102	5771	3064	2661	2188	6128	6927	5893	3984	3662	3686	5596	8154	3161	3814	3770	666
ENSMUSG00000010097	Nxf1	5644	840	899	802	799	828	606	1051	931	969	1245	1001	537	837	1215	496	1066	1007	197
ENSMUSG00000010110	Stx5a	3535	670	571	628	685	570	429	622	624	671	809	589	413	572	782	325	706	759	186
ENSMUSG00000010122	Slc47a1	2806	1	0	0	0	0	1	2	0	0	0	0	1	0	0	0	0	2	7
ENSMUSG00000010136	Pifo	1127	1	0	0	0	0	0	0	0	0	0	0	0	0	0	0	0	0	0
ENSMUSG00000010142	Tnfrsf13b	2626	435	529	390	585	507	352	487	401	354	529	405	252	420	630	268	635	662	130
ENSMUSG00000010154	Spire2	2510	0	2	0	0	2	0	0	0	0	0	0	0	0	0	1	0	1	3
ENSMUSG00000010175	Prox1	8390	0	0	3	0	0	1	3	0	0	0	1	1	0	0	0	2	0	10
ENSMUSG00000010205	Raver1	2047	289	265	243	193	249	183	295	281	271	285	227	172	272	338	153	311	250	33
ENSMUSG00000010277	2610507B11Rik	7443	6823	6732	6341	8628	7750	5882	6874	6726	6634	10148	8043	4880	5946	8895	3803	10537	10030	1830
ENSMUSG00000010290	AI597479	3458	334	342	341	378	256	221	398	320	326	352	336	183	342	432	207	417	423	100
ENSMUSG00000010307	Tmem86a	1831	557	419	579	723	431	392	532	540	513	758	587	513	434	618	250	682	731	174
ENSMUSG00000010311	Optc	2067	0	0	0	0	0	0	1	0	1	0	0	0	0	0	1	0	0	0
ENSMUSG00000010342	Tex14	4888	11	14	13	17	9	8	9	15	11	16	13	11	14	12	11	23	24	29
ENSMUSG00000010358	Ifi35	1362	1902	1277	2478	308	254	212	2911	3986	2763	613	454	2241	1927	2713	937	343	288	115
ENSMUSG00000010362	Rdm1	1124	77	88	64	141	110	75	52	32	49	88	36	40	82	92	37	124	131	71
ENSMUSG00000010376	Nedd8	604	1610	1665	1672	1589	1280	873	1442	1642	1526	1497	1186	940	1480	2042	905	1701	1811	589
ENSMUSG00000010392	Gosr1	4289	838	841	745	747	681	531	997	1054	806	862	713	517	818	1168	470	879	915	141
ENSMUSG00000010406	Mrpl52	480	1160	1086	941	276	205	199	1160	1114	977	449	308	223	1082	1482	647	353	366	105
ENSMUSG00000010435	Spaca7	787	0	0	0	0	0	0	0	0	0	0	0	0	1	0	0	0	0	0
ENSMUSG00000010453	Kansl3	4746	653	545	752	511	425	302	822	918	653	673	557	377	642	919	308	602	600	111
ENSMUSG00000010461	Eya4	6077	122	96	55	222	247	138	56	42	55	218	160	106	78	94	37	248	221	20
ENSMUSG00000010476	Ebf3	5295	0	0	0	0	0	0	0	2	0	0	0	1	0	3	0	0	0	4
ENSMUSG00000010505	Myt1	5667	1	1	1	0	2	1	2	3	0	0	0	0	0	0	0	1	0	0
ENSMUSG00000010517	Faf1	4468	930	956	914	1151	840	725	922	855	942	1067	879	620	831	1086	477	1247	1231	359
ENSMUSG00000010529	Gm266	1215	0	0	0	0	0	0	0	0	0	0	0	0	0	0	0	2	0	0
ENSMUSG00000010538	Tsacc	525	8	5	7	14	6	1	8	13	5	19	11	9	7	15	8	10	10	0
ENSMUSG00000010554	Mettl16	12985	271	358	306	400	306	248	278	298	281	377	315	159	286	356	184	479	437	130
ENSMUSG00000010592	Dazl	2942	2	1	0	3	2	3	0	0	0	3	1	1	1	0	3	2	1	6
ENSMUSG00000010601	Apol7a	2525	0	0	0	0	0	1	0	0	0	0	0	0	0	0	0	0	0	0
ENSMUSG00000010607	Pigyl	777	116	116	80	176	100	89	90	64	84	146	99	82	99	122	41	151	149	86
ENSMUSG00000010608	Rbm25	4867	1795	1778	1772	1664	1603	1166	2013	1616	1822	2234	1723	1157	1779	2514	981	2169	2026	383
ENSMUSG00000010609	Psen2	2392	1616	1570	1469	1315	1156	862	1488	1468	1422	1259	1028	890	1408	1934	856	1554	1582	321
ENSMUSG00000010651	Acaa1b	1689	1	6	11	4	2	0	8	5	6	4	7	2	5	6	4	0	5	0
ENSMUSG00000010660	Plcd1	2851	8	6	9	7	12	9	14	13	20	16	9	15	15	11	11	9	16	3
ENSMUSG00000010663	Fads1	3395	720	727	503	924	1001	796	577	502	608	1224	971	297	565	792	366	1158	1034	174
ENSMUSG00000010721	Lmbr1	5847	125	137	110	157	102	71	140	101	118	153	89	70	96	175	66	123	176	20
ENSMUSG00000010751	Tnfrsf22	4217	22	46	21	24	22	14	11	11	13	29	19	15	23	22	13	32	26	9
ENSMUSG00000010755	Cars	3304	358	351	374	442	445	315	381	298	332	366	290	286	329	408	221	382	429	126
ENSMUSG00000010760	Phlda2	788	0	0	0	0	0	0	0	0	0	0	0	0	0	0	0	0	0	0
ENSMUSG00000010796	Asz1	1736	0	0	0	0	0	0	0	0	0	0	0	0	0	0	0	1	0	1
ENSMUSG00000010797	Wnt2	2255	1	2	0	0	0	0	0	0	0	1	0	0	0	1	0	0	0	0
ENSMUSG00000010803	Gabra1	5118	0	1	0	0	0	1	2	1	0	1	0	2	0	0	0	0	0	0
ENSMUSG00000010825	Grid2ip	4697	0	3	2	0	0	1	0	0	0	0	1	0	1	1	0	0	0	0
ENSMUSG00000010830	Kdelr3	1414	0	0	1	0	3	0	0	0	0	0	0	0	1	0	0	0	0	1
ENSMUSG00000010841	1700006E09Rik	798	0	1	0	0	0	0	0	0	0	0	1	0	0	0	0	1	0	0
ENSMUSG00000010911	Apip	919	208	247	235	287	203	155	250	245	243	190	165	203	218	273	124	220	260	76
ENSMUSG00000010914	Pdhx	3930	429	447	439	604	312	310	509	560	515	463	465	305	389	621	225	508	489	160
ENSMUSG00000010936	Vac14	3069	729	703	586	579	738	482	755	714	667	817	683	481	629	972	443	844	817	147
ENSMUSG00000011008	Mcoln2	2804	3086	3762	3649	1672	1151	942	3527	3446	3185	1821	1161	850	3116	4383	1828	1701	1704	465
ENSMUSG00000011034	Slc5a1	4104	1	0	0	0	0	0	2	0	0	1	0	0	0	0	0	1	0	1
ENSMUSG00000011096	Akt1s1	2043	313	275	258	368	324	213	314	334	271	409	355	196	276	459	180	375	371	106
ENSMUSG00000011114	Tbrg1	1984	852	953	841	775	629	531	804	621	642	637	475	627	798	918	449	801	782	174
ENSMUSG00000011118	Panx3	2531	0	1	0	0	0	1	0	0	1	0	0	1	2	2	0	0	0	0
ENSMUSG00000011148	Adssl1	1867	1365	1248	1162	3228	2133	1861	859	979	854	2660	2385	1741	1231	1795	632	3589	3664	941
ENSMUSG00000011154	Cfap161	3015	0	0	6	1	0	1	0	1	2	1	0	0	3	0	0	0	0	5
ENSMUSG00000011158	Brf1	2615	384	397	353	488	398	332	465	420	428	596	513	305	415	636	212	524	500	130
ENSMUSG00000011171	Vipr2	3456	3	3	4	1	0	1	0	0	0	0	0	0	0	0	1	4	0	4
ENSMUSG00000011179	Odc1	2208	366	404	270	794	632	337	341	357	359	952	686	336	263	254	150	535	551	241
ENSMUSG00000011254	Thg1l	2422	304	302	219	224	166	95	426	404	318	270	195	132	238	339	150	226	191	92
ENSMUSG00000011256	Adam19	6383	270	161	174	149	167	79	182	124	99	180	54	21	129	144	28	148	96	10
ENSMUSG00000011257	Pabpc4	3198	293	313	203	312	481	314	216	182	163	375	275	127	267	363	171	461	389	60
ENSMUSG00000011263	Exoc3l2	4016	0	2	3	1	1	2	0	1	0	4	0	0	0	0	0	1	4	0
ENSMUSG00000011267	Zfp296	1530	3	7	2	4	5	0	1	4	1	4	0	1	2	1	0	7	2	0
ENSMUSG00000011305	Plin5	2087	0	0	0	1	0	0	0	0	0	0	0	0	0	0	0	1	0	0
ENSMUSG00000011306	Sugp1	2681	351	406	434	421	330	270	472	414	485	373	254	302	406	530	250	502	372	139
ENSMUSG00000011349	Dmrtc2	1619	0	0	1	0	1	0	0	0	0	0	0	0	0	0	0	1	0	2
ENSMUSG00000011382	Dhdh	4633	444	472	447	395	366	270	455	383	488	506	368	199	398	606	250	484	499	73
ENSMUSG00000011427	Zfp790	3658	261	279	253	288	258	200	305	247	251	295	274	152	260	367	158	358	336	93
ENSMUSG00000011463	Cpb1	2718	0	0	0	0	0	0	0	0	0	0	0	0	0	1	0	1	0	7
ENSMUSG00000011486	Slc25a41	1331	0	0	0	0	0	0	0	0	0	1	0	0	0	0	0	0	0	1
ENSMUSG00000011589	Fsd1	1748	0	0	0	0	0	1	0	0	0	0	0	0	0	0	0	0	0	1
ENSMUSG00000011632	Pinlyp	843	0	0	0	0	0	0	0	0	0	0	0	0	0	0	1	0	0	1
ENSMUSG00000011658	Fuz	1915	103	87	84	116	73	70	75	89	106	106	106	85	78	109	37	117	124	27
ENSMUSG00000011751	Sptbn4	9249	11	11	12	7	10	5	15	11	9	14	15	8	14	10	1	9	14	2
ENSMUSG00000011752	Pgam1	1831	3039	3169	2629	1940	1795	1283	2671	2663	2719	1823	1566	1881	3025	3931	1794	2239	2051	441
ENSMUSG00000011831	Evi5	6613	1077	1107	1019	1520	1157	916	1245	1051	1282	1644	1318	693	1020	1345	500	1549	1483	463
ENSMUSG00000011832	Evi5l	4976	230	242	219	297	257	158	255	233	175	248	205	151	242	345	123	305	292	68
ENSMUSG00000011837	Snapc2	1769	173	201	143	186	160	120	195	156	165	176	148	89	191	240	103	200	183	17
ENSMUSG00000011877	Git1	3512	351	414	319	340	457	388	395	354	304	485	413	307	414	582	214	511	471	114
ENSMUSG00000011884	Gltp	1762	1580	1573	1779	1714	1931	1485	1733	1786	1871	2618	2148	1315	1722	2263	859	2728	2111	362
ENSMUSG00000011958	Bnip2	3226	5675	4990	5728	4842	2859	2332	7286	8117	6613	4537	3933	2517	5269	7474	2782	4657	4686	1620
ENSMUSG00000011960	Ccnt1	7397	1175	1096	1095	1161	851	736	1257	1096	1212	1321	1044	587	1054	1335	567	1239	1260	332
ENSMUSG00000012017	Scarf2	3302	2	1	6	0	5	4	3	0	8	5	3	1	0	9	3	8	8	4
ENSMUSG00000012042	4930579F01Rik	1772	0	0	1	0	0	0	0	0	0	0	0	0	0	0	0	0	1	1
ENSMUSG00000012076	Brms1l	2609	205	254	232	304	221	174	233	233	242	248	220	139	224	270	146	295	296	86
ENSMUSG00000012114	Med15	3383	1041	910	920	760	934	667	1062	1037	873	1051	881	638	905	1372	557	1041	992	229
ENSMUSG00000012117	Dhdds	3250	585	574	637	571	523	371	684	696	639	595	528	512	607	803	394	615	581	182
ENSMUSG00000012123	Crybg2	4990	2	2	1	3	3	0	2	0	3	1	2	4	0	2	1	4	3	0
ENSMUSG00000012126	Ubxn11	2480	15	16	15	26	25	23	16	12	11	28	21	13	12	22	9	25	21	13
ENSMUSG00000012187	Mogat1	1393	0	0	0	0	1	2	0	2	0	3	2	0	2	0	0	3	0	2
ENSMUSG00000012211	Tex22	1270	3	3	1	2	1	2	0	3	5	6	4	0	0	2	1	3	2	0
ENSMUSG00000012282	Wnt8a	1746	0	0	0	0	0	0	0	0	0	0	0	0	0	0	0	0	0	0
ENSMUSG00000012296	Tjap1	3236	144	167	122	147	128	109	160	161	117	171	152	99	124	153	60	165	164	29
ENSMUSG00000012350	Ehf	5033	2	1	0	0	0	1	2	1	2	0	0	1	3	0	2	0	0	1
ENSMUSG00000012396	Nanog	2242	0	1	0	0	0	0	0	0	0	0	0	0	0	1	0	0	0	0
ENSMUSG00000012405	Rpl15	2397	1440	1570	1315	1705	1316	1155	1427	1428	1376	1735	1395	857	1337	1729	824	1879	1883	617
ENSMUSG00000012422	Tmem167	9776	1694	1776	1646	1508	1208	899	1716	1539	1698	1464	1235	860	1654	2175	863	1743	1801	402
ENSMUSG00000012428	Steap4	3155	11	4	11	0	0	0	2	3	8	0	0	0	6	8	3	0	0	2
ENSMUSG00000012429	Mplkip	2839	143	185	154	215	219	141	180	164	155	242	211	136	131	224	74	217	232	63
ENSMUSG00000012443	Kif11	4819	319	627	482	1089	1154	972	190	86	253	387	319	161	456	392	332	1147	877	383
ENSMUSG00000012483	Rpa3	670	41	58	73	137	60	59	66	51	56	91	82	43	47	72	36	105	109	117
ENSMUSG00000012519	Mlkl	2091	1374	978	2051	327	288	211	1839	1922	1841	296	237	1271	1462	1764	676	346	260	89
ENSMUSG00000012520	Phox2b	3645	0	0	0	0	0	0	0	0	0	0	0	0	0	0	1	0	0	0
ENSMUSG00000012535	Tnpo3	4269	1459	1608	1427	1374	1302	998	1581	1411	1402	1508	1194	841	1448	1866	838	1638	1582	376
ENSMUSG00000012609	Ttll5	8717	86	109	77	157	181	139	103	76	104	174	138	74	93	102	68	201	206	75
ENSMUSG00000012640	Zfp715	4840	476	502	404	971	684	534	506	394	419	828	683	282	441	629	251	1102	1082	296
ENSMUSG00000012705	Retn	1579	2	0	0	0	0	0	0	0	0	0	0	2	1	0	2	0	0	3
ENSMUSG00000012777	Acpt	1749	0	0	0	0	0	0	0	0	0	0	0	0	0	0	0	0	0	11
ENSMUSG00000012819	Cdh23	11118	5	1	4	3	0	2	0	4	0	1	4	0	2	3	0	1	3	20
ENSMUSG00000012848	Rps5	921	6659	7459	7168	8539	6086	5543	6350	7123	5707	8259	6449	3681	6391	8366	3866	8646	10503	4253
ENSMUSG00000012889	Podnl1	2090	1	0	0	0	0	0	0	0	0	0	0	0	0	0	0	0	0	3
ENSMUSG00000013033	Adgrl1	8536	2	1	2	0	0	1	7	1	1	6	8	2	0	5	1	1	2	0
ENSMUSG00000013076	Amotl1	9428	43	57	54	62	81	48	24	20	30	52	56	47	37	56	23	55	60	32
ENSMUSG00000013083	2200002J24Rik	616	2	0	0	0	0	0	0	0	0	0	0	0	0	0	0	0	0	0
ENSMUSG00000013089	Etv5	4103	741	448	625	725	721	553	598	753	582	851	808	452	588	960	318	1133	1094	159
ENSMUSG00000013091	Tmem190	589	0	0	0	0	0	0	0	0	1	0	0	0	0	0	0	0	0	0
ENSMUSG00000013150	Gfod2	4548	39	29	30	37	23	26	31	37	18	23	18	11	32	39	14	37	27	21
ENSMUSG00000013155	Enkd1	1275	35	26	35	39	46	32	27	17	24	53	41	28	32	32	20	51	49	11
ENSMUSG00000013158	4933405L10Rik	1214	0	0	0	1	0	0	0	0	0	1	1	0	0	0	0	1	0	0
ENSMUSG00000013160	Atp6v0d1	1629	2515	2701	2384	2376	2304	1511	2458	2481	2248	2478	1894	1551	2248	3229	1505	2891	2742	565
ENSMUSG00000013236	Ptprs	7026	532	474	379	674	714	630	389	347	348	886	695	493	548	765	279	1029	949	122
ENSMUSG00000013275	Slc41a1	4697	120	142	131	115	113	86	136	147	134	149	100	99	118	177	81	128	148	24
ENSMUSG00000013338	Fer1l4	6106	1	0	0	1	0	0	0	0	0	0	0	0	0	1	0	0	0	1
ENSMUSG00000013353	4931406B18Rik	5495	1	0	1	0	0	1	1	0	0	0	1	0	2	0	0	0	0	0
ENSMUSG00000013367	Iglon5	2622	0	0	1	0	0	0	0	0	1	0	0	0	0	0	0	1	1	2
ENSMUSG00000013415	Igf2bp1	1948	1	1	1	0	0	1	2	6	4	0	0	2	2	4	0	2	2	0
ENSMUSG00000013418	B4galnt2	1722	6	9	10	4	1	3	4	15	13	8	5	0	10	13	11	8	4	2
ENSMUSG00000013419	Zfp651	6353	4	9	4	18	15	14	11	15	8	18	22	2	16	20	10	21	20	0
ENSMUSG00000013465	Nelfb	2637	902	878	918	1036	717	586	919	997	916	976	737	582	882	1168	488	1105	1004	298
ENSMUSG00000013483	Card14	4206	0	0	1	1	0	1	2	0	0	0	0	0	2	0	0	0	1	1
ENSMUSG00000013495	Tmem175	4887	331	321	314	359	366	265	319	317	323	428	383	275	269	486	189	384	444	63
ENSMUSG00000013523	Bcas1	3090	3	3	3	1	0	0	2	1	1	0	0	0	3	1	1	2	1	1
ENSMUSG00000013539	Tango2	1604	243	291	237	242	136	123	239	286	267	213	196	155	218	299	119	236	213	120
ENSMUSG00000013584	Aldh1a2	2264	0	1	0	0	0	0	0	1	2	1	0	0	0	1	1	0	1	0
ENSMUSG00000013593	Ndufs2	1794	2052	2281	2130	2641	1715	1439	2153	2129	2017	2013	1591	1328	2056	2483	1179	2466	2348	906
ENSMUSG00000013611	Snx31	2862	0	0	0	0	0	0	0	0	1	0	0	0	0	0	0	0	0	0
ENSMUSG00000013622	Atraid	1367	700	667	588	1147	861	612	609	621	599	1030	798	528	633	786	283	1031	1125	380
ENSMUSG00000013629	Cad	7305	189	251	166	218	222	198	183	170	205	270	231	177	203	310	122	310	272	31
ENSMUSG00000013643	Lypd8	1284	0	0	0	0	0	0	0	0	0	0	0	0	0	1	0	0	0	0
ENSMUSG00000013646	Sh3bp5l	3016	332	371	340	442	357	215	356	381	324	380	325	302	333	421	191	503	434	133
ENSMUSG00000013653	1810065E05Rik	926	1	0	0	0	0	0	0	0	0	0	0	0	0	0	0	0	0	0
ENSMUSG00000013662	Atad1	2813	1553	1316	1542	1431	1273	986	1603	1662	1528	1656	1482	945	1268	1907	672	1809	1979	292
ENSMUSG00000013663	Pten	8292	2907	2791	2463	2836	2588	2031	3083	2736	3053	3600	3020	1495	2668	3648	1406	3319	3175	695
ENSMUSG00000013668	4933402N03Rik	1826	0	0	0	0	0	0	0	0	0	0	0	0	0	0	0	0	0	0
ENSMUSG00000013698	Pea15a	2720	2505	2663	2208	2888	2700	2148	2085	2112	2154	2990	2557	1250	2441	3244	1502	3837	3563	591
ENSMUSG00000013701	Timm23	1173	736	806	725	551	443	293	794	819	762	527	447	393	660	939	424	646	617	226
ENSMUSG00000013707	Tnfaip8l2	1122	884	678	937	893	885	630	1040	1103	879	1229	873	724	736	1182	479	993	1123	228
ENSMUSG00000013736	Trnt1	4101	793	795	771	891	592	510	975	863	847	827	638	458	730	1104	394	949	929	305
ENSMUSG00000013766	Ly6g6e	1273	0	0	1	0	0	1	0	0	0	0	0	0	0	0	0	0	0	1
ENSMUSG00000013787	Ehmt2	4145	3072	2669	2980	2558	2088	1628	3709	3986	3599	2510	2066	1658	2959	3644	1544	2647	2476	575
ENSMUSG00000013822	Elof1	1209	458	480	408	533	396	302	414	500	436	464	387	298	480	595	286	600	560	305
ENSMUSG00000013833	Med16	3306	489	482	389	400	423	296	473	481	412	539	427	349	419	567	248	531	505	123
ENSMUSG00000013846	St3gal1	4985	2218	1967	1692	696	797	675	2455	2315	1942	1449	1052	561	2300	3205	1205	1310	1145	192
ENSMUSG00000013858	Tmem259	2297	1077	1060	907	1095	941	667	1110	1107	1018	1423	1037	728	1008	1425	533	1181	1250	241
ENSMUSG00000013878	Rnf170	4747	224	231	170	262	185	125	270	223	222	304	174	131	215	300	112	232	310	61
ENSMUSG00000013921	Clip3	3509	0	0	3	0	1	0	0	0	0	0	0	0	1	0	0	1	0	2
ENSMUSG00000013928	Thap8	1184	4	2	1	2	3	0	0	0	1	2	1	0	1	1	0	3	0	0
ENSMUSG00000013936	Myl2	1609	1	0	0	1	0	1	1	1	0	2	0	1	1	0	0	1	2	8
ENSMUSG00000013973	Dedd	3483	331	273	313	229	232	182	326	369	298	295	221	232	341	428	182	300	251	46
ENSMUSG00000013974	Mcemp1	1494	392	439	346	145	57	70	428	491	598	164	113	163	403	456	281	114	111	51
ENSMUSG00000013997	Nit1	4016	334	372	355	364	315	233	355	262	351	311	267	202	346	448	180	357	358	109
ENSMUSG00000014030	Pax5	8697	1	0	2	0	1	0	2	1	1	0	1	0	2	0	0	0	0	4
ENSMUSG00000014039	Prdm15	6504	131	141	137	152	115	59	154	131	146	215	165	96	138	161	62	165	173	44
ENSMUSG00000014074	Rnf168	4462	618	588	597	643	527	398	722	583	623	604	579	420	573	855	346	701	788	219
ENSMUSG00000014075	Tctex1d2	838	358	365	331	487	304	216	260	247	241	334	230	175	271	341	173	441	426	220
ENSMUSG00000014077	Chp1	3299	1164	1177	1153	1270	1317	946	1769	1645	1706	1713	1442	986	1079	1474	703	1580	1552	269
ENSMUSG00000014104	Sval2	765	0	0	0	0	0	0	0	0	0	0	0	0	2	0	0	0	0	0
ENSMUSG00000014158	Trpv4	3231	39	50	38	64	70	37	58	61	75	137	94	49	56	84	20	65	96	16
ENSMUSG00000014164	Klhl3	7322	18	31	13	78	94	59	2	11	17	61	47	34	27	29	12	103	102	34
ENSMUSG00000014177	Tvp23b	1784	350	380	353	502	294	238	419	355	416	467	335	258	320	408	165	454	495	215
ENSMUSG00000014195	Dnajc7	2481	1661	1638	1672	1529	1270	880	1777	1692	1611	1444	1192	945	1524	1927	881	1702	1621	431
ENSMUSG00000014198	Zfp385c	3076	1	1	1	1	0	0	0	1	0	0	1	2	0	0	0	1	0	0
ENSMUSG00000014226	Cacybp	2098	1199	1214	1316	1029	815	705	1383	1278	1371	920	777	631	1137	1463	660	1097	1205	362
ENSMUSG00000014232	Cluap1	1371	75	112	82	187	100	83	106	64	85	142	99	60	96	100	44	142	136	55
ENSMUSG00000014243	Zswim7	732	99	110	76	68	60	45	86	94	70	74	63	26	71	109	48	81	62	25
ENSMUSG00000014245	Pigl	2174	54	71	71	53	63	37	68	59	54	84	55	38	55	63	32	50	56	8
ENSMUSG00000014294	Ndufa2	572	1230	1423	1198	1419	983	760	1283	1272	1221	1195	930	711	1191	1521	668	1317	1474	967
ENSMUSG00000014301	Pam16	596	55	61	59	56	53	43	74	53	56	78	56	36	54	83	31	81	65	8
ENSMUSG00000014303	Glis2	3660	1	3	2	1	0	0	0	0	3	6	1	0	2	1	1	1	1	4
ENSMUSG00000014313	Cox6c	1113	1470	1828	1680	1790	1276	1026	1607	1534	1589	1365	1105	777	1622	2046	858	1797	1750	1256
ENSMUSG00000014329	Bicc1	5555	0	1	0	0	1	1	0	2	0	1	1	1	0	0	0	2	0	0
ENSMUSG00000014349	Ube2z	3997	2020	1853	2016	1595	1298	1029	2305	2528	2180	1732	1508	1089	2075	2711	1035	1838	1826	353
ENSMUSG00000014351	Gip	687	0	0	0	0	0	0	0	0	0	0	0	0	0	0	1	0	0	0
ENSMUSG00000014353	Tmem87b	4842	1655	1437	1577	2116	1349	1017	1628	1599	1620	2099	1699	810	1510	2197	745	2074	2246	779
ENSMUSG00000014355	Anapc1	10086	1842	1999	1834	1931	2010	1594	1962	1745	1982	2423	1846	1383	1699	2576	1082	2572	2442	422
ENSMUSG00000014361	Mertk	4302	977	624	1280	975	827	720	1705	1281	1996	1596	1052	794	605	1393	480	1085	1232	185
ENSMUSG00000014402	Tsg101	1949	682	674	650	514	650	443	665	590	649	669	575	389	644	799	393	810	705	125
ENSMUSG00000014418	Hps5	4990	859	901	897	932	690	581	992	883	998	958	729	505	857	1163	444	1039	984	192
ENSMUSG00000014426	Map3k4	5305	492	481	462	430	394	303	473	475	512	427	393	327	407	619	245	473	464	87
ENSMUSG00000014444	Piezo1	8219	1996	1536	1558	1871	2101	1840	1528	1454	1273	2321	2054	1443	1784	2394	845	2848	2423	405
ENSMUSG00000014453	Blk	2326	1	0	0	0	0	0	0	0	0	0	0	0	0	0	2	0	0	3
ENSMUSG00000014470	Rnf166	1783	554	458	462	447	519	377	470	406	500	631	541	235	441	710	306	585	588	91
ENSMUSG00000014496	Ankrd28	5229	1123	1339	938	1656	1344	1096	748	540	673	1728	1538	729	1108	1195	597	1986	1901	479
ENSMUSG00000014498	Ankrd52	6602	556	538	442	353	470	381	452	362	414	427	393	295	474	586	289	626	503	70
ENSMUSG00000014503	Pkd2l2	2666	7	4	7	2	2	1	2	6	3	12	2	1	6	1	1	2	6	2
ENSMUSG00000014504	Srp19	876	401	459	439	381	367	244	416	421	406	354	271	242	389	552	261	399	440	172
ENSMUSG00000014529	Tmbim7	2016	0	0	0	0	0	0	0	0	0	0	1	0	0	1	0	0	0	1
ENSMUSG00000014542	Clec4f	2471	0	0	0	0	0	0	0	0	1	0	0	1	0	0	0	0	0	3
ENSMUSG00000014543	Klra17	1192	1	0	0	0	1	3	15	15	5	67	51	11	1	0	0	2	0	0
ENSMUSG00000014547	Wdfy2	6266	4744	3960	4743	3580	3156	2178	5258	5157	4810	4412	3230	2491	4266	5720	2215	3742	3481	813
ENSMUSG00000014550	Rbsn	5667	877	889	768	1028	745	530	973	855	813	1104	777	601	824	1112	462	1134	1156	273
ENSMUSG00000014551	Mrps25	6073	320	371	325	428	291	236	319	295	349	378	311	241	306	382	179	437	446	246
ENSMUSG00000014554	Dguok	1107	271	237	255	256	239	142	296	300	287	317	241	212	246	350	134	276	309	73
ENSMUSG00000014592	Camta1	9085	39	46	38	26	52	29	42	34	27	25	32	17	29	49	22	28	57	60
ENSMUSG00000014599	Csf1	4860	50	28	64	7	23	18	78	91	62	20	14	105	69	65	24	15	22	4
ENSMUSG00000014601	Strip1	3215	750	705	720	726	547	471	768	894	790	857	651	435	734	966	353	845	809	185
ENSMUSG00000014602	Kif1a	8738	16	6	10	1	4	4	27	19	14	6	0	1	17	8	2	2	2	2
ENSMUSG00000014603	Alx3	1874	0	0	0	0	0	0	0	0	0	0	0	0	0	0	1	0	1	0
ENSMUSG00000014606	Slc25a11	1955	2052	2108	1997	1665	1463	1026	2250	2259	2149	1730	1391	940	2004	2711	1176	1892	1786	398
ENSMUSG00000014609	Chrne	1616	1	1	0	0	0	2	0	1	0	0	0	1	1	0	0	1	4	0
ENSMUSG00000014633	Cmc2	1503	53	86	58	131	101	83	41	34	41	89	63	40	60	47	34	118	89	36
ENSMUSG00000014668	Chfr	3652	712	719	846	819	719	584	979	1004	961	1075	795	524	783	1056	383	965	866	185
ENSMUSG00000014686	Ceacam16	1635	15	21	15	19	14	20	7	10	16	19	14	20	9	28	13	27	29	56
ENSMUSG00000014704	Hoxa2	566	0	0	0	0	0	0	0	0	1	0	0	0	0	0	0	0	0	0
ENSMUSG00000014725	Adam28	3863	0	1	0	0	1	0	0	0	1	2	0	0	0	0	0	1	0	4
ENSMUSG00000014747	Ankrd53	1739	0	0	0	0	0	0	0	0	0	0	0	0	0	0	0	0	0	0
ENSMUSG00000014748	Tex261	2984	1060	1011	906	1211	1233	765	978	949	921	1572	1183	649	992	1359	569	1489	1479	204
ENSMUSG00000014763	Fam120b	4518	341	395	334	506	405	326	386	351	345	561	399	229	359	465	204	560	533	89
ENSMUSG00000014767	Tbp	13266	231	202	200	204	207	166	251	216	259	213	202	147	200	298	135	296	264	32
ENSMUSG00000014769	Psmb1	1036	2729	2985	2873	3339	1920	1583	2810	2818	2750	2282	1872	1510	2681	3196	1423	2710	2899	1421
ENSMUSG00000014771	Pdcd2	2277	188	242	223	269	197	122	245	201	210	215	188	106	183	256	122	291	267	144
ENSMUSG00000014773	Dll1	3581	8	6	9	0	5	1	9	20	9	2	3	15	0	15	1	0	1	1
ENSMUSG00000014776	Nol3	3176	1	2	0	0	0	1	0	1	5	4	1	2	0	2	1	0	0	0
ENSMUSG00000014778	Fhod1	3928	223	183	159	211	184	150	198	202	190	292	230	145	192	255	101	313	324	70
ENSMUSG00000014782	Plekhg4	4560	2	2	1	0	2	1	2	1	7	1	1	2	1	5	0	1	0	0
ENSMUSG00000014786	Slc9a5	3499	25	23	17	36	26	24	11	18	16	31	18	12	18	17	19	30	24	5
ENSMUSG00000014791	Elmo3	3189	9	14	9	7	9	2	12	16	16	15	7	3	6	4	8	16	9	4
ENSMUSG00000014813	Stc1	4197	0	0	0	0	0	0	0	0	1	0	0	0	3	0	1	0	0	8
ENSMUSG00000014837	4931428F04Rik	3889	13	16	31	36	33	14	28	26	44	33	20	25	32	43	17	50	24	14
ENSMUSG00000014846	Tppp3	1848	47	18	56	112	42	41	24	20	17	32	20	22	33	43	16	79	63	45
ENSMUSG00000014850	Msh3	4058	181	211	231	268	190	163	208	192	239	265	169	156	197	269	132	279	283	110
ENSMUSG00000014852	Adamts13	4874	4	4	2	4	1	0	6	2	4	0	1	2	1	2	1	0	3	6
ENSMUSG00000014856	Tmem208	1362	499	539	557	612	309	272	565	571	532	522	446	311	481	692	287	559	649	353
ENSMUSG00000014859	E2f4	1993	323	294	326	223	300	195	338	320	331	382	249	223	314	394	207	361	341	61
ENSMUSG00000014867	Surf4	3281	8387	8283	7445	4487	3852	2911	10173	10604	9439	5836	4602	3384	7735	10693	4345	5205	5279	938
ENSMUSG00000014873	Surf2	1203	139	135	112	178	143	107	169	144	157	219	178	59	110	188	79	186	202	47
ENSMUSG00000014905	Dnajb9	2549	400	388	361	448	379	266	379	278	384	377	355	219	315	474	216	464	527	127
ENSMUSG00000014907	Naf1	2990	95	88	66	84	125	68	68	70	49	92	86	39	90	104	32	108	107	21
ENSMUSG00000014932	Yes1	5399	0	1	2	0	0	2	0	1	0	4	2	3	0	0	0	2	1	7
ENSMUSG00000014956	Ppp1cb	5962	3756	4306	4222	3667	2504	2008	4359	4168	4932	2884	2610	1719	4226	5377	2024	3840	3706	1056
ENSMUSG00000014959	Gorasp2	3402	1339	1305	1105	952	1178	747	1250	1187	1104	1144	916	690	1085	1635	778	1219	1181	180
ENSMUSG00000014980	Tsen15	1133	98	85	104	133	91	77	102	80	87	118	117	51	104	141	59	173	157	70
ENSMUSG00000015001	Oc90	1912	0	0	0	0	0	0	0	0	0	0	0	0	0	1	0	0	0	0
ENSMUSG00000015002	Efr3a	6403	2100	2107	2182	2302	2062	1586	2302	2441	2438	2613	2028	1290	2219	2954	1099	2663	2733	561
ENSMUSG00000015013	Trappc2l	1659	474	573	612	619	432	321	509	512	549	439	470	381	533	676	331	644	697	212
ENSMUSG00000015016	Acsf3	3146	139	138	127	113	150	84	128	99	108	115	88	111	138	175	79	153	127	29
ENSMUSG00000015023	Ddx19a	2547	447	464	438	428	435	348	435	435	430	538	378	286	419	588	224	533	591	124
ENSMUSG00000015027	Galns	2557	1221	1154	1225	1419	1426	1021	917	1050	1123	1116	1020	634	1256	1676	832	1659	1721	301
ENSMUSG00000015053	Gata2	3683	3	4	4	1	2	1	0	1	1	1	3	1	4	4	2	1	2	0
ENSMUSG00000015083	C8g	1342	7	7	10	31	14	7	5	8	11	15	16	7	19	4	5	15	12	1
ENSMUSG00000015085	Entpd2	1935	0	0	0	0	0	0	6	1	1	0	0	1	3	0	0	1	2	4
ENSMUSG00000015087	Rabl6	3230	789	774	682	735	733	548	722	775	717	891	719	427	653	974	418	933	888	203
ENSMUSG00000015090	Ptgds	938	0	0	0	0	0	0	0	0	0	0	0	0	0	0	1	0	0	2
ENSMUSG00000015092	Edf1	722	1242	1255	1254	1004	781	616	1412	1570	1431	1043	858	737	1171	1520	714	1086	1194	418
ENSMUSG00000015093	Clic3	808	1	0	0	0	0	0	0	0	0	0	0	0	0	0	0	0	0	0
ENSMUSG00000015094	Npdc1	1595	1	3	4	3	6	0	5	2	3	3	3	4	0	13	2	4	5	0
ENSMUSG00000015095	Fbxw5	2388	448	364	350	374	309	219	420	380	370	429	351	295	362	538	204	412	382	51
ENSMUSG00000015112	Slc25a13	3122	460	631	468	1074	891	647	391	393	421	838	731	450	530	754	307	1424	1237	263
ENSMUSG00000015120	Ube2i	5077	1320	1361	1206	1474	1162	931	1539	1533	1391	1551	1305	831	1359	1756	712	1586	1574	376
ENSMUSG00000015126	Tsr3	1192	187	195	185	196	147	96	145	184	162	170	150	154	181	221	102	213	160	90
ENSMUSG00000015127	Unkl	5194	51	46	40	48	49	42	59	38	50	61	53	35	41	60	24	57	61	20
ENSMUSG00000015133	Lrrk1	7250	542	406	461	306	309	265	601	614	519	569	358	348	423	690	249	399	378	69
ENSMUSG00000015134	Aldh1a3	4434	2	3	0	0	0	0	2	0	2	0	0	0	1	1	0	1	0	6
ENSMUSG00000015143	Actn1	3800	2163	2251	1921	1818	1755	1548	1724	2053	1599	1831	1723	1097	2088	2869	1155	2560	2306	348
ENSMUSG00000015149	Sirt2	2254	1193	1098	938	1183	1343	842	977	954	970	1514	1077	741	1068	1388	619	1570	1526	227
ENSMUSG00000015165	Hnrnpl	2822	2340	2406	2120	2676	2407	1904	2611	2504	2435	3128	2533	1767	2186	3099	1427	3276	3395	588
ENSMUSG00000015176	Nolc1	3651	436	592	453	474	544	372	489	431	460	602	460	238	416	625	304	753	699	113
ENSMUSG00000015189	Casd1	3961	560	569	512	620	515	402	609	594	600	753	649	291	509	640	253	747	799	128
ENSMUSG00000015202	Cnksr3	3837	62	53	47	64	47	35	53	87	64	60	50	33	57	77	30	82	94	23
ENSMUSG00000015214	Mtmr1	4742	664	667	622	793	649	536	644	576	620	786	645	441	652	854	343	863	853	179
ENSMUSG00000015217	Hmgb3	1964	36	65	46	118	114	72	36	12	21	39	34	10	39	27	34	100	82	36
ENSMUSG00000015222	Map2	10816	1	2	1	1	2	4	0	2	5	2	0	1	2	2	1	6	1	12
ENSMUSG00000015224	Cyp2j9	2037	1	1	0	0	1	3	1	0	0	3	2	0	1	0	0	0	4	1
ENSMUSG00000015242	Nipsnap3a	1687	0	0	0	0	0	0	0	0	0	0	1	0	0	0	0	0	0	0
ENSMUSG00000015243	Abca1	10262	10335	6432	8088	2298	2261	3070	8989	9754	8556	6391	4897	2154	8023	13672	4056	3620	3330	620
ENSMUSG00000015247	Nipsnap3b	1552	764	798	657	674	556	395	654	738	710	673	559	416	696	934	359	751	779	126
ENSMUSG00000015289	Lage3	2021	234	273	213	314	211	143	222	203	219	232	194	130	213	279	137	335	332	153
ENSMUSG00000015290	Ubl4a	2527	266	278	238	358	256	186	291	284	264	267	241	136	291	335	180	333	415	117
ENSMUSG00000015291	Gdi1	2809	819	672	750	402	495	379	900	891	844	675	604	346	818	1069	409	720	610	94
ENSMUSG00000015305	Sash1	8049	8609	6844	6701	4996	5638	4934	8988	9896	8389	9373	7920	4956	7925	11346	3941	7890	7164	1187
ENSMUSG00000015312	Gadd45b	1372	561	417	567	257	187	188	418	434	352	232	208	181	647	419	153	307	362	71
ENSMUSG00000015314	Slamf6	7367	99	61	111	15	15	8	216	220	196	43	30	27	108	153	58	15	19	7
ENSMUSG00000015316	Slamf1	2693	6	4	7	0	2	3	16	18	14	2	1	0	8	7	4	3	0	0
ENSMUSG00000015335	Zdhhc12	1207	231	339	267	142	149	99	261	236	243	158	130	123	287	304	145	178	205	41
ENSMUSG00000015337	Endog	1063	77	119	68	80	35	39	92	111	101	97	46	47	54	112	52	72	79	36
ENSMUSG00000015340	Cybb	4809	81142	73390	84656	20371	14154	16448	93735	102497	102193	36868	27832	29821	80672	117314	42537	28488	26908	5331
ENSMUSG00000015341	Golga7	2005	1321	1156	1299	1121	1019	768	1267	1202	1245	1177	991	716	1153	1613	672	1251	1382	328
ENSMUSG00000015342	Xk	5076	15	15	14	22	45	22	19	13	17	29	15	15	23	11	5	32	45	10
ENSMUSG00000015354	Pcolce2	4438	3	0	0	1	0	0	0	1	1	0	1	0	0	0	0	0	2	6
ENSMUSG00000015355	Cd48	1189	2275	2217	2289	2099	1714	1340	2665	2448	2456	2487	1971	1181	1903	3142	1343	2482	2529	700
ENSMUSG00000015357	Clpx	2886	795	821	816	1115	742	571	924	797	950	1160	826	711	707	957	395	1070	1107	358
ENSMUSG00000015363	Trabd	3098	1033	1086	991	1081	768	582	1092	999	1029	869	700	527	997	1180	503	1071	1011	372
ENSMUSG00000015365	Mov10l1	4137	0	0	0	0	0	0	0	0	1	0	0	0	0	0	1	0	0	8
ENSMUSG00000015377	Dennd6b	4394	37	29	61	16	12	15	53	48	48	32	19	49	27	54	20	25	21	12
ENSMUSG00000015396	Cd83	2477	338	179	205	1289	777	794	143	152	120	1608	1163	91	372	243	78	1292	1748	344
ENSMUSG00000015401	Tmem27	1544	0	1	0	0	0	0	0	2	0	0	3	2	0	1	0	0	0	0
ENSMUSG00000015405	Ace2	3762	0	0	0	2	0	0	0	0	0	2	0	0	0	2	0	0	0	4
ENSMUSG00000015437	Gzmb	1436	0	0	0	0	0	0	0	0	0	0	1	0	0	0	0	0	0	0
ENSMUSG00000015441	Gzmf	919	0	0	0	0	0	0	0	0	0	0	0	0	0	0	0	0	0	0
ENSMUSG00000015443	Gzmn	990	0	0	0	0	0	0	0	0	0	0	0	0	0	0	0	0	0	0
ENSMUSG00000015452	Ager	1374	4	1	6	1	2	4	6	8	8	6	8	0	5	17	2	9	7	5
ENSMUSG00000015461	Atf6b	2575	824	919	875	694	650	509	1075	1076	1018	807	630	576	836	1178	526	822	814	152
ENSMUSG00000015467	Egfl8	1282	12	21	15	17	8	11	28	27	14	27	15	9	10	26	6	20	17	9
ENSMUSG00000015468	Notch4	6591	13	16	7	10	32	23	7	6	10	19	16	16	18	19	4	21	26	4
ENSMUSG00000015474	Ppt2	2614	889	1032	935	655	655	479	1080	1130	1100	904	657	535	889	1253	556	864	783	135
ENSMUSG00000015476	Prrt1	1940	2	3	3	2	4	2	3	0	3	2	6	3	2	4	2	1	1	1
ENSMUSG00000015478	Rnf5	1238	260	253	252	255	278	181	227	207	264	261	220	159	263	287	153	328	298	83
ENSMUSG00000015484	Fam163a	3882	0	0	0	0	1	0	0	0	1	0	0	0	0	0	0	0	0	0
ENSMUSG00000015488	Cacfd1	4682	281	274	242	259	218	170	297	231	268	342	222	168	280	376	155	305	336	59
ENSMUSG00000015501	Hivep2	10372	216	201	204	131	212	161	352	361	251	292	289	152	233	278	120	254	258	35
ENSMUSG00000015519	2310057J18Rik	1757	0	0	0	0	0	0	0	0	0	0	0	0	0	0	0	0	1	0
ENSMUSG00000015522	Arnt	4831	612	612	554	517	528	401	590	518	626	683	530	365	625	789	334	656	653	147
ENSMUSG00000015533	Itga2	7133	1	0	1	0	0	0	2	0	0	1	0	0	0	1	0	1	0	9
ENSMUSG00000015536	Mocs2	5282	1517	1197	1590	1114	763	603	1674	1749	1538	1068	790	839	1420	1918	705	1011	1174	393
ENSMUSG00000015542	Nat9	1228	245	309	290	537	306	232	227	272	239	286	181	203	234	259	128	363	419	205
ENSMUSG00000015568	Lpl	4115	44671	34946	37144	29212	23110	21228	26369	28328	21520	22876	23203	9023	37032	65733	22267	44319	44971	7436
ENSMUSG00000015575	Atp6v0e	3261	2428	2520	2597	2547	1860	1418	2343	2268	2318	2069	1756	1589	2359	3377	1382	2852	3077	827
ENSMUSG00000015579	Nkx2-5	1525	0	0	0	0	0	0	0	0	0	0	0	0	0	1	0	0	0	0
ENSMUSG00000015597	Zfp318	8356	301	307	232	370	434	291	362	268	326	586	417	201	257	360	141	459	417	80
ENSMUSG00000015599	Ttbk1	13858	0	0	1	0	2	1	1	0	1	0	1	2	0	1	1	0	2	13
ENSMUSG00000015605	Srf	3826	486	509	438	412	415	342	525	558	496	542	391	218	486	711	280	599	563	104
ENSMUSG00000015619	Gata3	3433	1	1	0	0	2	0	0	0	0	0	2	2	0	1	0	2	1	3
ENSMUSG00000015627	Gata5	3277	0	1	0	0	0	0	0	0	0	0	0	0	0	0	0	0	0	0
ENSMUSG00000015647	Lama5	11239	2	3	1	1	0	0	0	0	0	0	1	1	1	0	0	2	1	2
ENSMUSG00000015652	Steap1	1377	0	1	0	0	1	1	0	0	0	0	1	0	0	0	0	0	0	4
ENSMUSG00000015653	Steap2	10922	0	1	1	0	2	0	1	1	0	1	0	0	2	0	0	1	3	8
ENSMUSG00000015656	Hspa8	2554	18259	18534	20245	13947	10538	8730	16767	19746	16098	10719	10397	6667	17202	23441	11321	15916	16805	4910
ENSMUSG00000015659	Serac1	4007	75	109	85	151	124	82	85	57	88	173	138	69	90	125	90	163	139	25
ENSMUSG00000015665	Awat1	1390	0	0	0	0	0	0	0	2	0	0	0	0	0	1	1	0	0	0
ENSMUSG00000015668	Pdzd11	1696	343	340	339	222	230	139	369	361	335	231	205	176	339	425	207	302	268	68
ENSMUSG00000015671	Psma2	3673	3478	3644	3773	3136	1755	1428	3749	3856	3608	2108	1756	2050	3463	4015	1858	2567	2716	1657
ENSMUSG00000015672	Mrpl32	3013	319	307	327	351	243	211	363	320	292	272	224	168	311	388	216	371	354	117
ENSMUSG00000015697	Setdb1	4660	937	1039	931	970	854	655	1001	806	1032	1056	867	546	907	1293	628	1154	1030	253
ENSMUSG00000015702	Anxa9	2073	82	81	67	74	91	70	39	31	33	88	72	34	70	87	36	113	84	21
ENSMUSG00000015709	Arnt2	6844	7	3	6	3	4	0	10	10	8	0	3	13	4	7	1	3	0	12
ENSMUSG00000015711	Prune1	3140	276	296	208	324	342	263	232	220	235	365	310	173	279	302	135	439	454	77
ENSMUSG00000015714	Cers2	2592	3003	3164	2678	3010	3283	2368	2607	2597	2517	3416	2840	1768	2786	4169	1805	4371	4051	592
ENSMUSG00000015721	Nlrp5	3520	0	0	0	0	0	0	0	1	0	0	1	0	0	0	0	1	0	0
ENSMUSG00000015733	Capza2	2557	18793	15582	21255	10067	7022	6361	21856	24270	21800	11039	9636	9260	18031	26101	9021	11703	11887	3523
ENSMUSG00000015745	Plekho1	1985	2309	1985	2213	2629	2347	1790	2502	2527	2232	3286	2514	1823	2172	2803	1216	3203	3270	824
ENSMUSG00000015747	Vps45	2637	338	498	490	535	367	293	381	309	364	425	298	257	377	411	253	537	530	283
ENSMUSG00000015748	Prpf3	3362	250	352	289	302	213	194	335	265	291	257	226	218	315	330	162	327	295	49
ENSMUSG00000015749	Anp32e	3463	994	1388	1157	1498	1428	995	1027	965	1071	1041	983	554	1164	1152	660	1619	1386	469
ENSMUSG00000015750	Aph1a	2863	787	676	686	619	606	433	736	784	718	675	526	458	654	1019	387	680	658	119
ENSMUSG00000015755	Tab2	5557	1927	1575	1786	1137	1442	1066	2358	2395	2168	1945	1519	935	1867	2543	1026	1645	1650	181
ENSMUSG00000015757	Ppil4	3471	693	662	711	799	540	448	758	665	707	799	686	409	669	913	361	886	843	291
ENSMUSG00000015759	Cnih1	1523	891	982	852	1039	1063	806	722	695	783	974	844	509	737	1125	533	1306	1248	234
ENSMUSG00000015766	Eps8	5289	182	155	260	338	459	303	137	98	150	341	291	338	169	184	74	415	391	82
ENSMUSG00000015776	Med22	3614	923	908	676	1383	1138	764	988	1039	1004	2382	1716	719	913	1225	427	1479	1502	326
ENSMUSG00000015787	Abo	1920	0	0	0	0	0	0	0	1	0	0	0	0	0	0	0	0	0	0
ENSMUSG00000015790	Surf1	1228	531	527	516	641	424	322	635	586	498	702	536	432	460	659	314	644	616	184
ENSMUSG00000015804	Med28	4560	723	709	785	655	518	399	888	883	849	707	580	510	682	916	375	720	743	233
ENSMUSG00000015806	Qdpr	1721	665	804	692	880	676	504	563	602	604	676	590	372	631	856	367	856	967	300
ENSMUSG00000015812	Gnrh1	642	6	3	5	8	4	7	4	4	3	8	3	3	2	9	3	7	6	0
ENSMUSG00000015829	Tnr	12683	0	1	3	0	1	0	0	4	0	0	0	4	6	0	3	2	0	2
ENSMUSG00000015837	Sqstm1	2823	8955	12491	9841	7974	6484	5313	7536	7757	8256	9596	7575	5592	9797	10457	5378	8946	8757	2298
ENSMUSG00000015839	Nfe2l2	2475	2557	2730	2086	2004	2707	1985	2743	2857	2417	4000	2826	1399	2680	3676	1563	3090	2822	457
ENSMUSG00000015843	Rxrg	2297	0	0	0	0	1	0	0	0	0	0	1	0	0	0	0	1	2	1
ENSMUSG00000015846	Rxra	5180	920	842	751	1405	1130	854	764	728	762	1665	1365	674	732	1152	486	1413	1631	270
ENSMUSG00000015850	Adamtsl4	4051	9	4	5	1	2	0	11	11	7	7	4	7	4	10	1	2	5	0
ENSMUSG00000015852	Fcrls	2334	311	206	324	509	316	362	768	587	489	1620	956	95	245	325	129	520	729	174
ENSMUSG00000015854	Cd5l	2036	712	584	987	745	486	416	305	562	545	316	520	289	647	1199	274	1019	1221	452
ENSMUSG00000015869	Prpsap1	2039	276	301	300	424	340	250	379	333	346	466	335	313	265	398	177	423	427	88
ENSMUSG00000015879	Fam184b	4236	0	0	0	0	0	0	0	0	0	0	0	0	0	1	0	0	2	2
ENSMUSG00000015880	Ncapg	3703	169	334	210	517	479	338	105	31	112	170	149	53	208	173	174	468	347	185
ENSMUSG00000015882	Lcorl	10067	577	570	526	734	743	560	603	341	493	830	591	235	528	701	277	858	843	176
ENSMUSG00000015889	Lta4h	2029	673	680	637	1140	920	695	585	519	664	972	752	474	633	808	385	1155	1124	288
ENSMUSG00000015890	Amdhd1	2421	1	0	0	0	0	0	2	0	0	1	3	0	1	0	0	2	0	7
ENSMUSG00000015932	Dstn	1911	2855	3025	3011	2977	2106	1666	2530	2728	2614	2043	1961	1372	2703	3708	1665	3002	2948	918
ENSMUSG00000015937	H2afy	2137	1968	1802	2025	1491	1400	1040	2217	2034	1967	1589	1275	1482	1874	2455	1055	1793	1629	335
ENSMUSG00000015942	Gtf2ird2	3552	77	54	65	112	86	70	78	75	92	137	121	68	69	123	23	134	111	33
ENSMUSG00000015943	Bola1	1082	133	169	153	218	190	123	121	132	98	172	178	109	113	136	102	200	229	142
ENSMUSG00000015944	Gatsl2	7367	304	267	238	230	363	321	217	220	190	324	302	179	271	426	151	339	367	49
ENSMUSG00000015947	Fcgr1	2589	15090	7641	19723	2332	1639	1850	18708	19662	16135	3813	2690	10117	13712	19445	6369	3354	3178	917
ENSMUSG00000015950	Ncf1	2882	7123	7507	7383	6724	5913	4210	9760	10489	9462	9828	7718	7247	7058	9121	4066	7164	7268	1601
ENSMUSG00000015957	Wnt11	3633	0	0	0	0	0	0	0	0	0	0	0	0	0	0	0	0	0	0
ENSMUSG00000015961	Adss	2771	1492	2010	1338	3108	2608	1933	1035	929	1220	2448	1918	1225	1394	1804	842	3452	2995	917
ENSMUSG00000015962	1700016C15Rik	768	1	0	0	0	0	0	0	0	0	0	0	0	1	0	0	0	0	0
ENSMUSG00000015966	Il17rb	2098	0	0	0	0	0	0	0	0	0	1	0	0	0	1	0	0	0	0
ENSMUSG00000015968	Cacna1d	8982	1118	615	925	372	386	336	1432	1613	1285	744	677	311	986	1695	423	523	603	68
ENSMUSG00000015970	Chdh	5897	1	1	3	2	1	0	0	1	1	0	2	4	1	1	1	0	0	1
ENSMUSG00000015971	Actr8	2782	422	446	436	595	454	338	438	420	401	563	396	265	411	543	251	560	561	138
ENSMUSG00000015980	Lrrc27	2858	223	259	245	731	670	450	72	26	27	322	37	30	217	303	128	872	914	204
ENSMUSG00000015981	Stk32c	2302	6	11	6	21	13	11	5	2	2	7	5	5	6	3	0	18	10	12
ENSMUSG00000015994	Fnta	1930	1200	1312	1262	1414	962	803	1311	1210	1097	1197	945	639	1191	1613	694	1405	1519	568
ENSMUSG00000016018	Skiv2l2	3689	1075	1126	1080	1181	956	763	975	1032	976	1101	891	653	931	1330	607	1336	1378	267
ENSMUSG00000016024	Lbp	3302	8	8	14	10	9	2	16	18	11	4	14	3	11	12	7	11	17	4
ENSMUSG00000016028	Celsr1	11050	1	1	3	0	0	2	3	2	0	0	1	0	1	1	0	3	0	1
ENSMUSG00000016087	Fli1	3486	1911	1717	1792	2451	2129	1531	2361	2222	2103	2958	2375	1562	1679	2628	1079	2798	2925	597
ENSMUSG00000016128	Stard13	4574	0	0	1	0	2	2	2	0	1	1	3	1	0	2	0	0	0	3
ENSMUSG00000016150	Tenm1	12911	0	0	0	2	0	1	0	0	1	0	1	0	0	0	0	1	0	1
ENSMUSG00000016179	Camk1g	2511	0	0	0	0	0	0	0	0	1	0	0	0	0	0	0	0	0	0
ENSMUSG00000016181	Diexf	5726	215	236	165	220	181	149	256	192	229	257	218	93	155	296	123	273	320	51
ENSMUSG00000016194	Hsd11b1	2273	44	45	31	32	20	12	36	31	36	8	19	86	18	36	22	18	24	3
ENSMUSG00000016200	Syt14	9331	1	1	1	0	0	1	1	1	2	1	0	0	0	2	0	2	1	10
ENSMUSG00000016206	H2-M3	1438	922	704	1098	560	305	253	1476	1664	1487	595	446	576	996	1170	405	522	452	152
ENSMUSG00000016239	Lonrf3	3067	582	721	488	1173	1149	757	320	266	320	1098	908	379	580	671	314	1469	1522	270
ENSMUSG00000016252	Atp5e	421	1843	1969	1898	2380	1333	1186	1876	1972	1829	1761	1388	1106	1778	2262	882	2053	2208	1905
ENSMUSG00000016253	Nelfcd	2327	329	285	305	419	383	258	344	424	343	443	312	298	306	469	175	421	410	114
ENSMUSG00000016255	Tubb1	1406	2	4	1	0	3	3	2	6	1	6	4	1	2	8	1	1	0	2
ENSMUSG00000016256	Ctsz	1441	31935	29663	32351	24494	15732	12484	34596	37671	33781	22213	18077	18219	30151	41489	18173	24247	25197	7416
ENSMUSG00000016257	Prelid3b	1695	1071	1123	1098	928	700	534	1183	1117	1126	848	702	526	1070	1352	625	963	1001	345
ENSMUSG00000016262	Sertad4	3405	0	0	0	0	0	0	0	0	0	0	0	0	0	0	0	0	0	2
ENSMUSG00000016283	H2-M2	1551	203	288	363	4	5	11	205	327	199	23	25	30	381	297	116	23	10	3
ENSMUSG00000016308	Ube2a	1790	535	543	524	488	457	313	551	477	528	502	400	300	521	716	272	548	559	128
ENSMUSG00000016319	Slc25a5	1240	5058	5251	4778	6405	4061	3306	5274	5398	4954	5182	4214	2599	4298	5695	2712	5600	5626	2238
ENSMUSG00000016327	Atp1b4	4201	0	0	1	0	0	0	0	0	1	0	1	2	0	0	0	2	1	3
ENSMUSG00000016344	Ppdpf	1160	217	211	240	183	239	135	198	271	208	242	197	197	201	294	117	234	293	50
ENSMUSG00000016346	Kcnq2	8496	0	2	1	0	0	0	0	0	3	0	0	1	0	0	0	1	1	2
ENSMUSG00000016349	Eef1a2	2084	49	51	39	40	71	36	16	47	26	30	51	38	47	58	30	72	59	18
ENSMUSG00000016356	Col20a1	4189	16	10	15	15	8	9	18	24	29	27	11	22	18	22	13	20	13	5
ENSMUSG00000016382	Pls3	3676	1385	1435	1420	1872	1375	1407	1340	1207	1241	1688	1583	1391	1569	1477	724	2528	1712	474
ENSMUSG00000016386	Mpped2	3043	0	0	0	1	0	0	0	0	0	1	0	0	0	0	0	0	0	5
ENSMUSG00000016409	Nkap	4230	488	467	516	518	450	386	484	442	497	581	458	307	487	684	279	701	618	100
ENSMUSG00000016427	Ndufa1	419	805	684	773	883	640	478	726	769	703	656	558	457	713	976	366	808	958	507
ENSMUSG00000016458	Wt1	3364	0	0	0	0	0	0	0	0	1	0	0	0	0	0	0	0	0	4
ENSMUSG00000016477	E2f3	5361	360	319	264	280	267	222	327	307	293	339	304	160	319	391	164	401	383	69
ENSMUSG00000016481	Cr1l	3264	1586	1524	1636	1586	1034	841	1731	1924	1683	1456	1346	988	1607	1972	799	1531	1513	470
ENSMUSG00000016487	Ppfibp1	5322	2372	2190	2084	2051	1670	1489	1653	2046	1444	2086	1945	1178	2144	2701	1083	2438	2341	604
ENSMUSG00000016493	Cd46	6288	21	14	22	15	10	16	28	8	24	35	31	4	22	42	15	33	20	5
ENSMUSG00000016494	Cd34	2610	0	6	4	7	12	6	2	0	1	7	4	2	5	1	1	7	6	6
ENSMUSG00000016495	Plgrkt	1982	630	622	604	804	679	450	533	472	544	631	479	366	610	856	343	732	763	236
ENSMUSG00000016496	Cd274	3622	4957	2879	8720	562	586	562	5588	7938	6305	719	654	1833	5404	8032	2091	865	915	131
ENSMUSG00000016498	Pdcd1lg2	1645	9	9	11	2	4	0	11	14	8	5	2	4	3	0	6	2	1	1
ENSMUSG00000016503	Gtf3a	1482	371	467	393	546	520	321	341	398	343	510	373	280	346	515	235	583	592	164
ENSMUSG00000016510	Mtif3	5127	230	229	236	227	192	156	243	245	244	216	188	144	225	310	118	230	235	100
ENSMUSG00000016520	Lnx2	4557	135	126	129	125	155	125	133	96	102	141	131	107	114	200	84	155	126	33
ENSMUSG00000016524	Il19	1149	0	0	3	1	1	0	1	1	0	0	0	0	2	0	0	0	0	0
ENSMUSG00000016526	Dyrk3	3178	14	33	14	44	52	45	9	4	6	28	23	31	27	11	7	46	36	11
ENSMUSG00000016528	Mapkapk2	3041	12704	12345	11842	4243	3738	3076	16171	19328	14240	7541	5740	6008	12828	16752	6120	5556	4819	984
ENSMUSG00000016529	Il10	1310	93	39	215	30	24	24	174	91	105	78	19	69	79	128	34	35	57	26
ENSMUSG00000016534	Lamp2	5039	13864	12184	16002	13200	11063	9001	14383	13824	14732	13005	11183	10129	13485	18628	6852	15891	16931	3657
ENSMUSG00000016541	Atxn10	2425	1098	1265	1006	1522	1407	910	936	1023	915	1312	1036	597	1003	1438	627	1614	1600	395
ENSMUSG00000016552	Foxred2	4891	367	393	288	337	365	239	185	166	221	270	188	249	309	439	237	371	352	62
ENSMUSG00000016554	Eif3d	1910	1955	2359	2076	2231	1701	1296	2066	2159	2098	2044	1562	1369	1977	2538	1242	2264	2390	735
ENSMUSG00000016559	H3f3b	2514	13375	10462	15416	9478	7148	5750	14939	18723	15598	10282	8372	8871	13721	17495	5841	10344	10773	3765
ENSMUSG00000016619	Nup50	4741	923	885	918	941	847	649	918	871	810	865	792	597	818	996	494	1084	984	223
ENSMUSG00000016624	Phf21b	3762	0	0	1	3	0	1	0	0	2	2	0	0	0	0	0	0	0	3
ENSMUSG00000016626	Nlrp14	3537	0	1	0	0	0	1	0	0	0	0	0	0	0	1	0	0	2	3
ENSMUSG00000016637	Ift27	1012	118	113	91	113	152	85	87	79	82	136	107	66	70	107	64	110	162	27
ENSMUSG00000016664	Pacsin2	3885	1987	1950	1897	2467	2013	1567	2467	2546	2350	2578	2265	1429	1733	2660	1023	3003	3051	569
ENSMUSG00000016756	Cmah	10180	2	1	3	12	25	13	0	0	0	11	5	0	1	4	2	16	4	3
ENSMUSG00000016757	Ttll12	3220	209	251	215	203	280	156	220	236	244	241	202	168	193	231	117	304	295	55
ENSMUSG00000016758	Bik	943	0	0	0	0	1	0	0	1	1	0	8	0	0	3	0	0	3	0
ENSMUSG00000016763	Scube1	7926	0	0	0	0	0	0	0	0	0	1	0	0	0	2	0	0	1	5
ENSMUSG00000016831	Tox4	5340	1904	1607	1936	1404	1229	898	2136	2242	1956	1591	1202	1268	1768	2306	950	1591	1502	395
ENSMUSG00000016833	Mrps18c	940	738	750	807	811	475	378	784	747	744	547	415	529	765	831	422	687	725	373
ENSMUSG00000016918	Sulf1	8045	1	0	2	0	0	0	2	0	0	1	0	0	0	1	0	2	0	16
ENSMUSG00000016921	Srsf6	3692	2156	2195	1839	2115	1734	1409	2162	2259	1973	2552	2273	1149	1904	2907	1027	2764	2592	545
ENSMUSG00000016933	Plcg1	5907	193	216	205	256	261	190	225	199	261	296	272	145	198	291	130	309	306	59
ENSMUSG00000016940	Kctd2	2671	198	231	207	281	255	190	178	213	191	287	221	129	196	247	114	308	263	77
ENSMUSG00000016942	Tmprss6	3191	0	0	0	0	0	0	0	0	1	0	0	1	1	1	0	1	0	0
ENSMUSG00000016946	Kctd5	2443	530	550	493	535	369	287	448	516	449	394	286	258	539	643	264	566	571	120
ENSMUSG00000016982	Pom121l2	3534	0	0	0	0	0	0	0	0	0	0	1	0	0	0	0	1	0	1
ENSMUSG00000016984	Etaa1	4185	163	181	158	235	203	196	156	147	175	201	160	115	155	197	95	317	278	86
ENSMUSG00000016995	Matn4	2367	0	0	2	0	0	0	0	0	0	0	0	0	1	0	0	0	2	0
ENSMUSG00000016998	Svs4	731	0	0	0	0	0	0	0	0	0	0	0	0	0	5	0	0	0	2
ENSMUSG00000017000	Svs6	535	0	0	1	0	0	0	0	0	0	0	0	0	0	0	0	0	0	0
ENSMUSG00000017002	Slpi	936	488	538	550	37	14	36	735	674	887	102	70	492	479	550	303	51	29	9
ENSMUSG00000017003	Svs3a	1200	0	0	0	0	0	0	0	0	0	0	0	0	0	0	0	0	0	0
ENSMUSG00000017004	Svs5	646	0	0	0	0	0	0	0	0	0	0	0	0	0	0	0	0	0	0
ENSMUSG00000017007	Rbpjl	2456	0	0	0	0	0	0	0	0	0	0	0	0	0	0	0	0	0	0
ENSMUSG00000017009	Sdc4	2458	8645	5658	8410	3021	2622	2388	12810	16251	10998	5329	4324	2314	8777	12263	3575	4408	4171	1022
ENSMUSG00000017049	Ccdc70	1115	0	1	0	0	1	0	0	0	0	0	0	0	1	0	0	0	1	2
ENSMUSG00000017057	Il13ra1	3712	860	679	1069	217	187	205	1207	1269	999	471	375	468	844	1450	446	273	262	31
ENSMUSG00000017064	Prl5a1	1061	0	0	0	0	0	0	0	0	0	0	0	0	0	0	0	0	0	0
ENSMUSG00000017119	Nbr1	5227	1795	1852	1824	2497	2000	1697	1830	1642	1750	2860	2066	1218	1598	2236	1024	2671	2643	557
ENSMUSG00000017132	Cyth1	3708	963	938	1117	1908	1262	1040	954	1067	1043	1813	1323	1198	1034	1279	482	1734	1708	553
ENSMUSG00000017144	Rnd3	4365	1541	1481	1054	517	430	316	4652	4350	2956	4109	2897	1061	1207	2221	725	788	688	169
ENSMUSG00000017146	Brca1	6629	141	223	181	337	402	326	84	45	77	227	202	119	145	164	133	403	322	103
ENSMUSG00000017165	Gast	460	0	0	0	0	0	1	0	0	2	0	0	0	0	0	0	0	0	0
ENSMUSG00000017167	Cntnap1	5440	19	23	15	24	8	10	13	8	31	19	18	13	14	30	13	15	24	3
ENSMUSG00000017176	Nt5c3b	2325	111	125	106	141	97	89	129	141	141	114	117	93	116	134	79	137	154	76
ENSMUSG00000017188	Coa3	886	519	528	559	611	427	306	564	470	502	444	336	332	514	650	309	593	549	338
ENSMUSG00000017195	Zpbp2	1639	1	0	0	1	1	0	0	1	0	0	0	2	1	0	0	1	1	6
ENSMUSG00000017204	Gsdma	2726	0	0	0	0	0	0	0	0	2	2	0	0	1	0	0	0	2	0
ENSMUSG00000017210	Med24	3535	448	361	348	358	474	287	361	352	399	400	379	338	376	542	236	482	466	117
ENSMUSG00000017211	Gsdma2	1673	0	0	1	0	0	0	0	0	0	0	0	0	0	0	0	2	0	1
ENSMUSG00000017221	Psmd3	2220	1349	1405	1252	940	880	720	1505	1482	1370	1059	836	863	1303	1716	773	1124	1099	235
ENSMUSG00000017264	Exosc10	2790	730	755	616	519	647	462	851	890	714	745	535	470	721	926	446	710	686	115
ENSMUSG00000017286	Glod4	1900	672	743	671	1090	613	537	679	677	677	787	606	384	707	869	368	950	978	354
ENSMUSG00000017288	Vps53	3268	787	885	764	741	766	518	754	757	736	778	590	519	720	954	471	845	818	238
ENSMUSG00000017291	Taok1	12421	4809	4514	4144	4601	4367	3940	4649	3965	4808	5958	5135	2373	4561	6225	2288	6608	6134	1159
ENSMUSG00000017299	Dnttip1	1860	339	283	310	321	231	164	377	323	327	282	200	199	302	381	156	314	295	93
ENSMUSG00000017300	Tnnc2	700	0	0	0	0	1	0	0	0	0	0	0	0	2	0	0	0	0	0
ENSMUSG00000017307	Acot8	1152	242	263	266	246	154	128	297	255	296	216	159	167	258	396	145	258	200	73
ENSMUSG00000017309	Cd300lg	2737	12	14	9	14	21	9	4	8	7	12	8	11	12	13	5	14	12	3
ENSMUSG00000017310	Spint4	751	0	0	0	0	0	0	0	0	0	0	0	0	0	0	0	0	0	1
ENSMUSG00000017311	Pyy	625	0	0	0	0	0	0	0	0	0	0	0	0	0	0	0	0	0	0
ENSMUSG00000017314	Mpp2	4245	1	3	0	0	0	0	0	0	1	0	0	1	0	0	0	0	0	0
ENSMUSG00000017316	Ppy	500	0	1	0	0	0	0	0	0	0	0	0	0	0	0	0	0	0	0
ENSMUSG00000017344	Vtn	1744	0	0	0	0	0	0	0	0	0	0	0	0	0	0	0	0	0	0
ENSMUSG00000017376	Nlk	4444	364	322	295	375	369	226	324	298	300	391	358	220	304	475	189	444	476	110
ENSMUSG00000017386	Traf4	2078	4	0	3	1	1	0	1	1	2	0	7	0	0	2	1	3	1	0
ENSMUSG00000017390	Aldoc	2976	1286	1135	681	1265	875	509	787	552	634	836	543	387	1003	1335	584	1120	1109	295
ENSMUSG00000017400	Stac2	3139	51	53	30	74	72	65	55	87	48	186	231	104	67	79	36	100	85	6
ENSMUSG00000017404	Rpl19	683	2120	2175	1981	2090	1866	1443	2153	2488	2067	2437	1911	1186	1907	2400	1091	2251	2282	786
ENSMUSG00000017405	Nek8	2809	28	33	42	48	35	34	40	40	30	39	45	28	41	57	20	42	36	25
ENSMUSG00000017412	Cacnb4	8709	13	17	7	6	3	7	12	16	11	22	6	5	6	16	6	12	5	3
ENSMUSG00000017417	Plxdc1	3149	211	173	157	295	343	258	122	83	122	318	231	128	165	281	110	400	400	61
ENSMUSG00000017418	Arl5b	7272	289	282	268	381	337	212	258	232	253	433	317	139	285	384	148	440	444	92
ENSMUSG00000017421	Zfp207	4735	3353	3115	3127	2204	2085	1434	3722	3567	3244	2667	2055	1913	3450	4525	1806	2748	2727	513
ENSMUSG00000017428	Psmd11	3020	691	795	786	511	485	425	760	811	813	550	477	363	702	772	401	644	650	138
ENSMUSG00000017446	C1qtnf1	3131	0	1	4	0	0	0	6	1	4	0	0	0	2	5	0	0	1	3
ENSMUSG00000017453	Pipox	1998	0	1	0	0	0	0	0	0	0	0	0	0	0	1	0	0	0	0
ENSMUSG00000017466	Timp2	3896	2835	2337	2497	4039	4106	2936	2726	3104	2625	6104	5656	2926	2491	3130	1078	5192	4714	732
ENSMUSG00000017478	Zc3h18	3956	737	776	730	630	693	519	894	866	807	913	710	518	727	1004	448	914	858	138
ENSMUSG00000017485	Top2b	10335	2778	2759	2439	2656	2260	1697	2908	2425	2866	2989	2377	1407	2565	3592	1355	3000	2996	585
ENSMUSG00000017491	Rarb	3940	0	0	0	0	1	0	0	0	0	3	1	2	2	1	0	3	0	4
ENSMUSG00000017493	Igfbp4	3924	2050	1941	1715	3322	3068	2241	2250	2548	1978	5105	4555	1229	1648	2403	943	3731	3832	636
ENSMUSG00000017499	Cdc6	4783	79	142	86	123	140	116	47	16	33	109	99	63	81	80	92	150	162	33
ENSMUSG00000017548	Suz12	4373	1006	941	937	1300	1060	962	935	826	954	1199	1016	593	942	1208	500	1454	1336	393
ENSMUSG00000017550	Atad5	7275	129	192	160	252	295	216	116	82	119	233	216	122	150	176	119	359	286	108
ENSMUSG00000017561	Crlf3	2396	1019	1117	1316	979	759	637	1436	1452	1357	1251	977	685	1005	1285	599	983	1084	343
ENSMUSG00000017588	Krt27	1550	0	0	0	0	0	0	0	0	0	0	0	0	1	0	0	0	0	0
ENSMUSG00000017607	Tns4	4755	22	24	22	19	15	13	19	25	25	34	15	49	20	40	10	21	24	20
ENSMUSG00000017615	Tnfaip1	3781	780	797	669	628	837	571	730	672	643	860	677	347	762	948	495	916	852	139
ENSMUSG00000017631	Abr	7846	5182	4871	4756	3103	2903	2851	5211	5559	5239	4332	3949	3594	5289	6797	2705	4148	3871	707
ENSMUSG00000017639	Rab11fip4	7451	23	24	20	21	17	7	18	13	17	12	17	14	10	28	12	19	21	2
ENSMUSG00000017652	Cd40	3100	1290	972	2066	290	153	120	1757	2458	1868	324	228	744	1372	1767	634	269	274	83
ENSMUSG00000017664	Slc35c2	2169	517	544	446	712	617	375	529	421	474	620	465	376	448	674	322	763	676	147
ENSMUSG00000017667	Zfp334	8205	30	30	20	19	16	15	25	21	12	33	18	22	22	22	15	35	23	11
ENSMUSG00000017670	Elmo2	6403	815	811	747	834	842	683	860	827	812	969	791	601	811	1106	520	1128	1134	171
ENSMUSG00000017677	Wsb1	2476	2183	1996	1883	2468	1895	1378	2173	2054	2020	2422	2126	996	2036	2815	986	2840	2868	589
ENSMUSG00000017679	Ttpal	4810	941	938	772	729	668	559	890	844	887	846	762	479	853	1215	517	1011	862	147
ENSMUSG00000017686	Rhot1	4392	947	1001	949	1039	789	644	1097	1112	1094	1179	1003	554	933	1262	514	1245	1332	426
ENSMUSG00000017688	Hnf4g	2630	0	0	0	0	0	0	0	0	0	0	0	0	0	0	0	0	0	4
ENSMUSG00000017692	Rhbdl3	3736	1	1	1	1	0	0	0	0	1	2	0	1	1	3	0	0	0	6
ENSMUSG00000017697	Ada	1688	35	29	34	42	29	20	50	38	32	40	27	30	30	39	22	28	37	13
ENSMUSG00000017707	Serinc3	3683	10008	9656	9816	15020	14817	9678	8088	8110	8696	16822	12768	7224	9219	11192	4989	14922	14761	3066
ENSMUSG00000017713	Tha1	1770	47	43	50	63	38	23	84	104	72	50	42	21	56	71	23	50	52	21
ENSMUSG00000017715	Pgs1	2673	1205	1197	1204	916	680	599	1333	1511	1268	927	847	584	1228	1586	615	954	977	243
ENSMUSG00000017716	Birc5	3402	163	365	213	366	463	282	109	56	84	118	106	49	217	145	139	382	268	208
ENSMUSG00000017718	Afmid	1479	22	28	21	12	13	11	28	38	30	40	10	9	30	50	10	23	13	1
ENSMUSG00000017720	Trp53tg5	934	0	0	0	0	0	0	2	0	0	0	0	0	0	0	0	0	0	9
ENSMUSG00000017721	Pigt	3004	470	397	395	335	496	280	384	366	365	424	356	359	414	559	239	508	471	41
ENSMUSG00000017723	Wfdc2	979	0	0	1	1	0	0	0	0	0	0	0	0	0	0	0	1	0	0
ENSMUSG00000017724	Etv4	2400	1	2	0	1	3	2	1	0	0	0	1	0	4	0	1	4	2	5
ENSMUSG00000017733	Eppin	778	0	0	0	0	0	0	0	0	0	0	0	0	0	0	0	1	0	0
ENSMUSG00000017734	Dbndd2	4389	201	181	195	264	164	135	219	199	191	310	154	153	181	229	120	289	250	101
ENSMUSG00000017737	Mmp9	3363	301	345	498	47	48	105	171	250	193	42	53	253	317	907	248	97	143	4
ENSMUSG00000017740	Slc12a5	6208	8	11	11	3	4	7	5	7	8	7	3	5	0	12	10	2	5	0
ENSMUSG00000017747	Ghdc	2486	244	282	249	321	270	202	240	234	235	279	211	127	230	329	151	312	338	59
ENSMUSG00000017754	Pltp	2402	3540	1907	3392	1813	2127	2145	6090	7063	5055	6643	5593	1716	3083	4640	1176	3784	3499	373
ENSMUSG00000017756	Slc12a7	5142	1083	983	977	722	679	550	1160	1127	974	984	865	551	939	1283	546	1092	961	159
ENSMUSG00000017760	Ctsa	3809	10157	9263	9677	9587	9762	7648	9429	9678	9473	11526	9304	6633	9587	14244	5955	12944	13097	2220
ENSMUSG00000017764	Zswim1	2781	75	78	76	51	92	61	64	58	63	78	54	62	75	82	59	89	82	10
ENSMUSG00000017765	Slc12a4	3626	1144	1035	1090	707	648	631	1291	1371	1184	1073	849	571	1167	1527	582	1062	1007	189
ENSMUSG00000017767	Spata25	786	4	2	7	1	3	3	7	3	12	2	4	5	6	6	4	3	10	0
ENSMUSG00000017774	Myo1c	5596	3528	3368	3146	2943	3220	2285	3701	3809	3370	3554	3105	2546	3321	4901	1820	4152	3879	649
ENSMUSG00000017776	Crk	4730	3138	2682	2830	2641	2024	1738	3651	3676	2946	3252	2835	1674	2813	4072	1449	3108	3355	750
ENSMUSG00000017778	Cox7c	1131	979	1053	1076	1268	730	635	914	954	938	988	796	533	880	1183	435	1120	1261	816
ENSMUSG00000017781	Pitpna	3781	8175	7129	7448	5039	4837	3927	8516	8882	8039	6571	5344	4626	7356	10542	4099	6787	6496	1143
ENSMUSG00000017801	Mlx	1988	740	805	781	571	450	350	891	894	786	595	451	466	742	965	426	672	585	157
ENSMUSG00000017802	Retreg3	3356	1093	998	1130	1249	955	765	1090	1037	1132	1372	1020	759	1096	1564	604	1245	1376	317
ENSMUSG00000017817	Jph2	4255	0	1	0	0	0	0	0	1	0	0	0	0	4	0	0	0	0	1
ENSMUSG00000017830	Dhx58	2412	3322	1853	3885	308	215	251	4039	4807	3703	640	458	2631	3316	4252	1590	434	305	116
ENSMUSG00000017831	Rab5a	2357	1728	1491	1768	1482	1222	972	1985	1907	1921	1574	1321	1015	1639	2255	811	1800	1655	334
ENSMUSG00000017832	Hspb9	726	0	1	4	1	1	1	0	5	0	1	2	0	1	4	1	0	3	0
ENSMUSG00000017837	Nkiras2	2923	1020	1093	1063	959	959	612	959	859	868	916	573	535	1015	1376	600	1131	1162	241
ENSMUSG00000017843	Ppp2r5c	7188	2855	2930	2717	2635	2733	1972	2898	2874	2803	3025	2390	1661	2607	3582	1552	3383	3257	556
ENSMUSG00000017858	Ift52	2371	653	603	568	785	507	408	525	547	525	582	437	312	508	687	323	753	696	176
ENSMUSG00000017861	Mybl2	3608	23	29	19	55	49	33	10	3	10	32	40	21	17	18	24	60	70	11
ENSMUSG00000017868	Sgk2	3294	0	1	0	1	0	0	0	0	0	0	0	0	0	0	2	0	0	2
ENSMUSG00000017897	Eya2	2693	0	0	0	0	0	0	0	0	1	0	0	0	0	0	0	1	0	2
ENSMUSG00000017922	Prl3c1	930	0	0	0	0	0	0	0	1	0	0	0	0	0	1	0	0	0	4
ENSMUSG00000017929	B4galt5	4210	2169	1815	2586	1926	1768	1333	2091	2420	2020	1751	1671	1612	2200	3151	1136	2604	2434	408
ENSMUSG00000017943	Gdap1l1	2580	3	1	2	2	2	0	0	0	1	6	1	0	4	3	3	11	5	1
ENSMUSG00000017950	Hnf4a	4702	0	0	1	0	0	0	0	0	0	0	0	0	0	0	0	3	0	0
ENSMUSG00000017969	Ptgis	2288	0	0	0	0	1	0	0	0	0	1	0	1	2	0	1	0	0	4
ENSMUSG00000017978	Cadps2	6229	0	3	1	0	0	1	2	0	1	0	0	0	2	0	0	0	0	3
ENSMUSG00000017999	Ddx27	4054	485	616	522	687	502	412	533	557	489	661	509	322	506	588	286	794	773	207
ENSMUSG00000018001	Cyth3	4682	781	708	648	921	734	628	840	828	748	1004	838	463	753	929	372	1040	972	176
ENSMUSG00000018008	Cyth4	2791	8035	6327	7062	5724	5036	3878	8171	8064	6606	6513	5298	3531	6998	10026	3953	7440	7009	1483
ENSMUSG00000018012	Rac3	1076	107	76	104	30	37	22	139	146	118	46	55	18	89	140	48	45	48	21
ENSMUSG00000018040	Rrp7a	4538	919	1193	1174	993	843	655	1233	1374	1255	1055	820	824	1003	1659	627	1069	1205	293
ENSMUSG00000018042	Cyb5r3	4298	3351	3693	3216	2698	2863	2076	3654	3959	3265	3271	2755	2047	3145	5448	1879	3297	3924	567
ENSMUSG00000018068	Ints2	6148	415	474	469	527	396	303	425	367	462	500	395	377	493	570	220	647	544	151
ENSMUSG00000018076	Med13l	9323	1161	929	966	817	891	819	1220	1116	998	1353	1005	640	1071	1583	543	1260	1101	460
ENSMUSG00000018102	Hist1h2bc	1156	582	735	735	992	780	612	442	382	603	448	448	743	672	887	455	947	1013	620
ENSMUSG00000018126	Baiap2l2	2441	0	1	0	0	0	0	0	0	0	0	0	0	0	0	0	1	1	1
ENSMUSG00000018143	Mafk	3619	637	506	835	523	343	288	695	859	732	509	449	499	578	910	270	528	564	167
ENSMUSG00000018160	Med1	8174	1119	1086	1051	849	976	740	1348	1341	1328	1268	1071	742	1131	1516	647	1336	1157	194
ENSMUSG00000018166	Erbb3	5890	90	47	58	48	55	28	96	94	104	70	53	55	63	120	22	101	71	15
ENSMUSG00000018167	Stard3	2070	1738	1331	1994	766	536	478	1978	2347	1963	1018	721	1383	1641	2236	770	846	860	164
ENSMUSG00000018168	Ikzf3	3658	0	0	0	0	0	0	1	0	0	0	0	5	0	0	0	0	0	2
ENSMUSG00000018169	Mfng	1865	6	7	7	8	23	18	10	14	15	57	32	16	4	28	1	7	44	6
ENSMUSG00000018171	Vmp1	1288	1270	1346	1359	916	682	588	1406	1240	1329	1035	952	625	1217	1546	684	1040	1135	388
ENSMUSG00000018189	Uchl5	1857	466	566	567	759	571	486	463	426	450	595	394	326	491	573	267	757	734	235
ENSMUSG00000018196	Glrx2	4507	272	266	230	326	230	179	293	248	268	265	212	171	241	341	155	266	340	83
ENSMUSG00000018199	Trove2	8738	768	871	689	1189	1051	798	619	439	653	1204	952	407	649	943	403	1515	1576	281
ENSMUSG00000018209	Stk4	5684	3584	3614	3412	3073	2952	2160	3959	3943	3634	3798	3008	2370	3459	4940	2079	3826	3759	730
ENSMUSG00000018211	Wfdc15b	572	0	0	0	0	1	0	0	0	0	0	0	0	0	0	2	0	0	0
ENSMUSG00000018217	Pmp22	2155	3178	3328	2650	5350	6321	4067	2307	2055	2239	5450	4393	2526	3443	4103	1987	7944	7460	896
ENSMUSG00000018238	Gdf9	1793	7	13	5	9	9	4	10	6	8	14	5	5	7	2	1	3	2	1
ENSMUSG00000018239	Zcchc10	1267	33	38	38	47	27	27	48	31	38	32	19	16	23	32	17	57	35	9
ENSMUSG00000018259	Prl8a2	939	0	0	0	0	0	0	0	0	0	0	0	0	0	0	0	0	0	0
ENSMUSG00000018263	Tbx5	4675	0	0	1	0	1	0	0	0	3	0	0	0	0	1	1	0	0	1
ENSMUSG00000018286	Psmb6	798	3629	4374	3758	3351	2099	1716	3287	3046	3192	2098	1743	1792	3607	4061	2196	3056	3107	1896
ENSMUSG00000018287	Spag7	1159	433	490	410	434	466	341	449	477	417	525	424	228	381	554	245	519	567	151
ENSMUSG00000018293	Pfn1	1026	9784	10109	9279	4726	6806	4753	10858	10669	10054	7891	6558	4973	8926	13468	5974	8085	7606	1166
ENSMUSG00000018322	Tomm34	2369	259	313	251	196	341	171	263	313	303	371	249	198	268	374	195	352	302	42
ENSMUSG00000018326	Ywhab	3382	2246	2306	2071	2061	2061	1704	2326	2387	2284	2233	1969	1285	2102	2940	1277	2539	2455	446
ENSMUSG00000018334	Ksr1	7022	58	76	45	37	47	31	113	103	86	65	50	28	68	82	30	40	45	2
ENSMUSG00000018339	Gpx3	1813	74	38	68	55	82	52	103	85	92	147	111	28	65	86	30	78	80	17
ENSMUSG00000018340	Anxa6	2489	4410	3296	4489	3892	2940	2330	10400	9640	9305	6981	4821	3880	4076	4773	1990	3700	3941	951
ENSMUSG00000018341	Il12rb2	3794	11	24	12	28	28	15	7	9	3	23	15	18	8	18	5	30	16	6
ENSMUSG00000018347	Zkscan6	2371	307	227	231	279	183	137	237	280	227	296	208	192	237	281	142	275	305	82
ENSMUSG00000018362	Kpna2	2633	786	1184	861	1265	1237	904	738	527	743	799	568	414	858	911	599	1141	1194	349
ENSMUSG00000018363	Smurf2	4794	829	783	772	945	759	632	1053	1090	930	1102	926	475	817	1110	494	1033	1100	251
ENSMUSG00000018372	Cep95	3072	138	122	107	144	111	86	107	116	109	146	118	93	126	153	70	147	145	24
ENSMUSG00000018377	Vezf1	4601	555	554	424	584	722	555	532	470	507	830	666	372	527	669	307	863	765	142
ENSMUSG00000018378	Cuedc1	3180	108	110	71	177	177	138	53	85	70	220	138	119	112	179	53	224	216	25
ENSMUSG00000018379	Srsf1	5558	3557	4001	3679	4389	2987	2349	3910	3471	3736	3607	3179	2187	3602	4621	1977	4386	4489	1317
ENSMUSG00000018381	Abi3	4006	97	110	142	32	46	42	142	126	145	71	65	58	159	156	84	62	44	3
ENSMUSG00000018387	Shroom1	3424	0	0	0	0	0	1	0	0	0	0	0	0	0	1	0	1	3	0
ENSMUSG00000018395	Kif3a	3421	362	402	386	1262	957	695	294	198	274	1259	890	264	363	386	178	1171	1282	342
ENSMUSG00000018398	Sept8	6087	1447	1431	1300	1546	1677	1184	1339	1338	1159	1871	1557	1045	1422	1929	709	2040	1965	270
ENSMUSG00000018401	Mtmr4	6240	675	732	611	645	561	405	742	659	668	692	496	413	569	835	379	697	698	145
ENSMUSG00000018405	Mrm1	2477	108	152	171	172	122	100	163	162	136	154	122	65	122	206	97	181	200	64
ENSMUSG00000018411	Mapt	6438	0	0	0	0	0	2	0	0	0	0	0	1	0	0	0	0	1	6
ENSMUSG00000018412	Kansl1	5407	555	538	523	634	838	542	637	588	586	964	734	469	584	845	315	942	848	198
ENSMUSG00000018415	Gid4	4283	418	426	377	448	404	368	385	374	384	481	455	194	410	517	205	583	527	98
ENSMUSG00000018417	Myo1b	5662	89	127	70	97	100	114	92	74	71	122	126	30	51	119	67	150	149	34
ENSMUSG00000018425	Dhx40	3813	740	699	810	663	495	422	583	580	746	573	467	344	745	834	415	596	645	205
ENSMUSG00000018427	Ypel2	4847	275	264	200	223	290	158	189	219	212	342	214	127	286	370	133	263	234	33
ENSMUSG00000018428	Akap1	3979	271	358	245	333	307	210	266	271	295	338	298	182	267	393	157	395	418	69
ENSMUSG00000018433	Nol11	3158	578	619	562	648	460	370	654	513	557	599	453	319	525	752	314	734	682	147
ENSMUSG00000018442	Derl2	4301	1802	1664	1688	1425	1079	723	1752	1851	1701	1327	1188	925	1546	2198	872	1468	1477	631
ENSMUSG00000018446	C1qbp	1175	313	411	287	435	382	279	270	250	292	312	315	144	327	383	212	538	476	132
ENSMUSG00000018449	Rpain	1100	179	166	176	345	186	119	205	195	205	274	168	101	179	244	107	268	235	194
ENSMUSG00000018459	Slc13a3	3524	777	495	852	89	89	96	1249	2001	1070	135	174	139	484	1092	381	132	128	12
ENSMUSG00000018470	Kcnab3	2538	0	2	1	0	3	0	2	4	3	3	1	2	2	2	2	2	4	0
ENSMUSG00000018474	Chd3	7309	922	716	707	1175	1134	701	971	978	830	1588	1347	691	730	1029	417	1349	1373	218
ENSMUSG00000018476	Kdm6b	6654	20	13	20	8	6	27	24	20	14	57	30	3	21	15	11	23	24	14
ENSMUSG00000018479	1700125H20Rik	995	0	0	0	0	0	0	0	0	0	0	2	0	1	0	0	0	0	2
ENSMUSG00000018481	Appbp2	6463	1178	1144	1038	1032	943	766	1017	1080	1124	997	981	620	1048	1463	582	1390	1307	197
ENSMUSG00000018486	Wnt9b	4518	0	0	0	0	0	0	0	0	0	1	1	1	0	0	0	0	0	0
ENSMUSG00000018500	Adora2b	1845	156	143	140	24	28	44	115	109	101	83	76	36	194	133	88	55	65	33
ENSMUSG00000018501	Ncor1	11777	1834	1818	1630	1586	2136	1665	1992	1679	1891	2723	2046	1183	1744	2433	966	2563	2090	296
ENSMUSG00000018507	Trpv2	3080	1610	1720	1453	1950	1997	1334	1359	1174	1280	2072	1520	1231	1479	2151	1014	2436	2228	460
ENSMUSG00000018509	Cenpv	1032	14	17	10	42	32	15	18	12	14	39	19	12	13	25	9	36	29	14
ENSMUSG00000018537	Pcgf2	2836	13	12	12	19	23	13	17	5	17	24	15	8	14	9	11	27	17	2
ENSMUSG00000018541	Cwc25	4710	477	454	550	445	385	302	485	484	467	487	393	314	470	543	259	551	509	121
ENSMUSG00000018543	1700001P01Rik	624	0	0	1	0	0	1	2	0	0	1	1	0	0	1	0	1	0	0
ENSMUSG00000018547	Pip4k2b	5053	1252	1315	1130	824	884	715	1497	1425	1431	1273	956	551	1181	1655	754	1099	1200	218
ENSMUSG00000018548	Trim37	5632	322	391	247	628	573	432	321	211	282	565	422	222	278	332	175	658	679	191
ENSMUSG00000018554	Ybx2	1812	2	0	0	1	0	1	0	0	1	2	0	0	1	2	0	0	1	7
ENSMUSG00000018559	Ctdnep1	1676	584	574	551	262	374	279	659	723	568	540	436	277	600	777	313	507	473	78
ENSMUSG00000018565	Elp5	1798	561	602	599	605	473	319	665	602	601	534	434	320	641	714	326	612	614	222
ENSMUSG00000018566	Slc2a4	2835	0	0	4	0	1	0	0	1	0	0	0	0	0	1	0	1	0	0
ENSMUSG00000018567	Gabarap	1351	5826	5624	5289	5256	5034	3579	5767	5752	5301	6232	4773	3330	5144	7455	3246	6380	6677	1626
ENSMUSG00000018569	Cldn7	1948	0	1	2	0	0	0	0	0	0	0	0	0	0	0	0	0	0	1
ENSMUSG00000018570	2810408A11Rik	1714	2	1	0	1	2	3	1	0	4	2	0	0	1	3	2	3	2	4
ENSMUSG00000018572	Phf23	2761	1189	1292	1218	1296	915	766	1560	1668	1506	1536	1349	823	1171	1531	644	1332	1431	452
ENSMUSG00000018574	Acadvl	2168	878	928	887	1191	840	627	927	885	916	1078	850	733	824	1071	472	1147	1085	438
ENSMUSG00000018581	Dnah11	14072	1	2	0	1	1	1	1	0	1	1	2	0	1	3	0	0	3	12
ENSMUSG00000018583	G3bp1	1323	1020	1225	1018	976	899	747	1074	1077	970	1097	874	633	996	1260	624	1258	1227	356
ENSMUSG00000018585	Atox1	541	1699	1915	1832	1593	1309	1105	1750	1907	1765	1701	1250	1121	1834	2535	1071	1822	1838	647
ENSMUSG00000018589	Glra2	3150	0	0	0	0	0	0	0	0	0	0	0	0	0	0	0	1	0	0
ENSMUSG00000018593	Sparc	2721	2	5	5	1	1	10	7	2	2	1	1	0	2	5	2	3	4	2
ENSMUSG00000018595	Glra4	1831	0	0	0	0	0	0	0	0	2	0	0	0	0	0	0	0	0	3
ENSMUSG00000018599	Mief2	2522	395	418	380	306	173	156	370	323	345	246	180	200	336	489	184	284	312	62
ENSMUSG00000018604	Tbx3	5205	0	0	0	0	0	0	0	0	0	0	1	0	1	0	0	0	0	0
ENSMUSG00000018620	Mmp20	3287	0	1	0	0	0	1	0	0	1	0	0	0	0	0	0	0	0	1
ENSMUSG00000018623	Mmp7	1068	0	0	0	0	0	0	1	0	0	0	0	0	0	0	0	0	0	0
ENSMUSG00000018634	Crhr1	2460	1	0	0	0	0	0	0	0	0	0	0	0	0	3	0	0	0	3
ENSMUSG00000018648	Dusp14	1945	0	0	1	1	5	2	0	0	0	0	1	2	1	0	0	6	3	11
ENSMUSG00000018651	Tada2a	2358	52	75	65	79	60	74	107	61	83	123	77	59	55	110	49	112	101	24
ENSMUSG00000018654	Ikzf1	5777	2157	1699	2176	885	1093	782	3329	4128	3057	1738	1396	1357	2034	3275	993	1402	1250	317
ENSMUSG00000018656	Tcaf3	3389	0	0	0	0	1	0	0	0	0	2	0	0	2	0	0	0	0	1
ENSMUSG00000018659	Pnpo	2139	255	260	216	294	254	168	209	207	201	278	218	164	217	313	141	351	286	115
ENSMUSG00000018661	Cog1	4706	492	457	434	401	453	330	496	457	415	608	422	324	431	632	274	564	517	112
ENSMUSG00000018666	Cbx1	2430	368	389	389	463	396	261	402	347	365	436	376	211	392	482	220	497	514	129
ENSMUSG00000018669	Cdk5rap3	2575	300	353	317	425	266	190	298	251	318	292	216	192	276	316	184	393	338	176
ENSMUSG00000018672	Copz2	930	77	61	67	92	86	48	84	58	61	77	57	17	70	88	27	85	79	22
ENSMUSG00000018677	Slc25a39	2167	603	566	466	553	620	407	576	531	493	757	553	399	571	795	318	729	676	133
ENSMUSG00000018678	Sp2	3414	54	41	36	31	50	51	48	55	53	48	45	31	66	83	29	67	61	7
ENSMUSG00000018697	Aatf	1822	290	383	311	423	295	219	453	392	351	449	379	175	362	369	192	432	448	137
ENSMUSG00000018698	Lhx1	3971	0	0	0	1	0	1	0	0	0	1	0	0	0	3	0	0	0	1
ENSMUSG00000018707	Dync1h1	14342	14560	13325	14062	9529	9385	8193	16421	17553	15540	12179	9807	12012	14964	19199	7812	12901	11007	2312
ENSMUSG00000018727	Cpsf4l	1687	0	2	0	0	0	1	0	0	0	1	0	0	0	0	0	0	0	1
ENSMUSG00000018733	Pex12	3370	91	102	79	143	121	90	88	84	111	133	113	63	88	135	45	160	125	40
ENSMUSG00000018736	Ndel1	3072	1365	1401	1273	1469	1204	876	1449	1555	1416	1533	1322	766	1277	1720	804	1737	1832	411
ENSMUSG00000018740	Slc25a35	3677	25	21	20	14	31	13	27	24	32	22	16	22	24	28	15	29	15	5
ENSMUSG00000018750	Zbtb4	8117	684	609	548	604	690	440	670	653	636	958	712	433	667	820	331	831	829	151
ENSMUSG00000018761	Mpdu1	1321	899	887	952	1112	732	586	938	988	894	905	757	575	874	1261	506	1001	1187	291
ENSMUSG00000018765	Fxr2	2951	930	974	900	992	804	597	951	926	932	963	800	510	856	1138	452	1129	1090	310
ENSMUSG00000018770	Atp5g3	724	2012	2190	1922	2049	1646	1111	1961	1950	1910	1622	1376	1056	1723	2278	979	1998	2016	680
ENSMUSG00000018774	Cd68	1257	12182	11321	10419	11653	15111	9369	10086	10064	9377	14430	11489	7393	10843	15460	7090	16719	17380	2322
ENSMUSG00000018776	Slc35g3	1618	0	0	0	0	0	0	1	0	0	0	0	0	0	0	0	0	0	2
ENSMUSG00000018796	Acsl1	4348	15753	14210	13251	1151	1038	897	22151	24204	18585	1501	1202	1368	16826	20411	8743	1684	1288	268
ENSMUSG00000018800	Abca5	8320	87	103	70	282	247	146	111	229	155	467	703	187	100	77	39	343	278	54
ENSMUSG00000018809	Smyd4	3517	111	123	85	162	117	100	77	77	92	131	104	110	93	128	63	205	153	41
ENSMUSG00000018819	Lsp1	2641	1583	1891	1135	1969	2642	1428	833	843	887	1648	1364	1692	1812	1762	969	3051	2409	407
ENSMUSG00000018820	Zfyve27	5705	530	478	470	519	365	291	472	461	472	508	446	237	472	682	232	574	576	124
ENSMUSG00000018821	Avpi1	1236	92	131	75	159	118	91	136	84	85	127	112	92	101	99	57	111	113	90
ENSMUSG00000018822	Sfrp5	1900	0	0	0	0	0	0	0	0	0	0	2	0	0	0	2	0	0	0
ENSMUSG00000018830	Myh11	6632	1	1	2	0	0	2	2	1	5	0	0	0	5	1	4	2	0	2
ENSMUSG00000018841	Rad51d	3426	119	144	94	105	140	88	118	111	95	151	121	85	113	147	49	155	153	17
ENSMUSG00000018844	Fndc8	2166	0	0	1	0	0	0	0	0	0	2	0	0	1	0	0	0	0	2
ENSMUSG00000018845	Unc45b	4258	0	1	4	1	1	0	0	0	1	1	0	1	1	0	0	2	1	0
ENSMUSG00000018846	Pank3	7376	3438	3977	2971	5147	3972	3178	2880	2371	3232	4172	3629	1331	3223	4204	1716	5644	6011	942
ENSMUSG00000018848	Rars	2109	1551	1660	1703	1640	1354	1030	1714	1830	1669	1386	1208	996	1477	1918	965	2027	1934	476
[truncated: 19,736 more rows]
